# Supplementary material for: Two-step synthesis of chiral fused tricyclic scaffolds from phenols via desymmetrization on nickel
Source: PubMed Central journal article supplement (PMC5484674; doi:10.1038/s41467-017-00068-8), 2017-06-26
Supplement: 41467_2017_68_MOESM1_ESM.pdf [file 41467_2017_68_MOESM1_ESM.pdf]

File Name: Supplementary Information

Description: Supplementary Figures, Supplementary Table, Supplementary Methods and Supplementary References.

File Name: Peer Review File

Description:

## Supplementary Methods

**General considerations and starting materials.** All manipulations were conducted under a nitrogen atmosphere by using standard Schlenk or dry box techniques unless otherwise noted.  $^1\text{H}$  and  $^{13}\text{C}$  spectra were recorded on Bruker AVANCE III 400 spectrometers at 25 °C. The chemical shifts in  $^1\text{H}$  NMR and  $^{13}\text{C}\{^1\text{H}\}$  NMR spectra are reported in parts per million (ppm) and are referenced to the residual solvent signal as the internal standard:  $\text{CDCl}_3$   $\delta = 7.26$  ( $^1\text{H}$ ) and  $\delta = 77.0$  ( $^{13}\text{C}$ ) ppm;  $\text{C}_6\text{D}_6$ :  $\delta = 7.16$  ( $^1\text{H}$ ) and  $\delta = 128.1$  ( $^{13}\text{C}$ ) ppm. Splitting patterns are denoted as "s" for singlet; "d" for doublet; "t" for triplet; "q" for quartet; "sext" for sextet; "sept" for septet; "m" for multiplet, "br" for broad; "dt" for doublet of triplets; "td" for triplet of doublets, and "app" for apparent. Mass spectra were obtained by using a Shimadzu GCMS-QP 2010 instrument with an ionization voltage of 70 eV. Medium-pressure column chromatography was carried out on a Biotage Flash Purification System Isolera, equipped with a 250 nm UV detector. Analytical gas chromatography (GC) was carried out on a Shimadzu GC-2014 gas chromatograph, equipped with a flame ionization detector. High resolution mass spectrometry (HRMS) and elemental analysis were performed at Instrumental Analysis Center, Faculty of Engineering, Osaka University. Enantioselectivities were recorded by means of either JASCO-Supercritical Fluid chromatography (SFC) equipped with PU-2080- $\text{CO}_2$  plus  $\text{CO}_2$  delivery pump and MD-2018 plus as a photodiode array detector using chiral stationary phase columns of Diacel Chiralpak (IA). Optical rotations were measured either in JASCO-DIP-1000 or JASCO-P-2200 polarimeter with a path length of 1 dm using the sodium D line, 589 nm. THF, toluene, and benzene- $d_6$  were distilled from sodium benzophenone ketyl and other solvents were distilled and degassed prior to use. All commercially available reagents were distilled over  $\text{CaH}_2$  under reduced pressure prior to use. All synthesized starting materials were purified either by distillation over  $\text{CaH}_2$  or recrystallized prior to use. Chiral *N*-heterocyclic carbene (NHC) salts were synthesized according to the reported procedures.<sup>1-4</sup>

### Preparation of alkynyl-cyclohexadienones (1)

The general experimental procedures for the preparation of alkynyl-cyclohexadienone were followed as reported previously (Supplementary Figure 1).<sup>5-7</sup> (Diacetoxyiodo)benzene (1.1 equiv) (PIDA) was added portion wise to a stirred solution of 4-substituted phenol (1.0–15 mmol) in propargyl alcohol (1.0 mL/mmol of phenol) at 0 °C. The solution was allowed to warm to room temperature for overnight. Reaction was quenched with saturated aqueous  $\text{NaHCO}_3$  solution to neutralize the acidic reaction mixture and extracted with EtOAc for three times. The combined organic phases

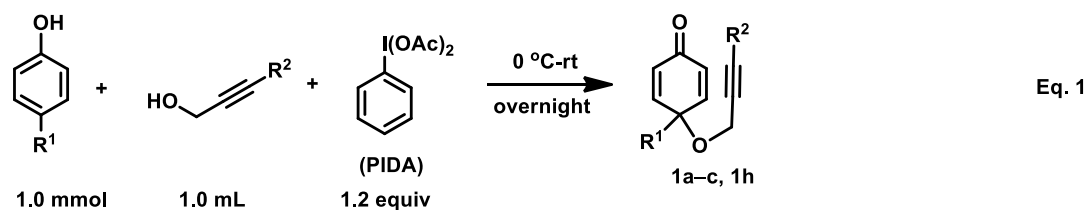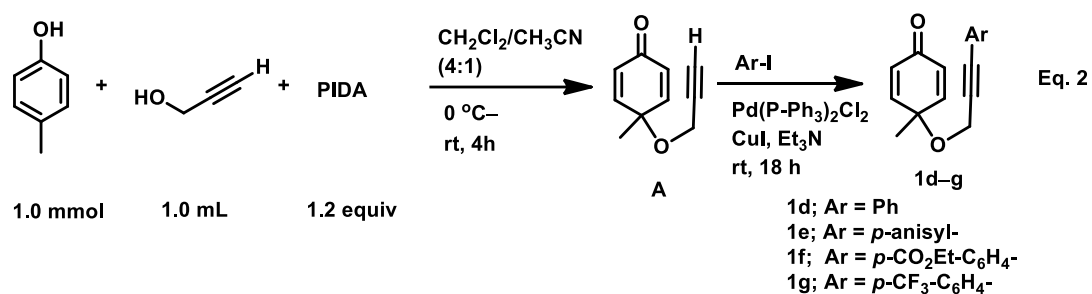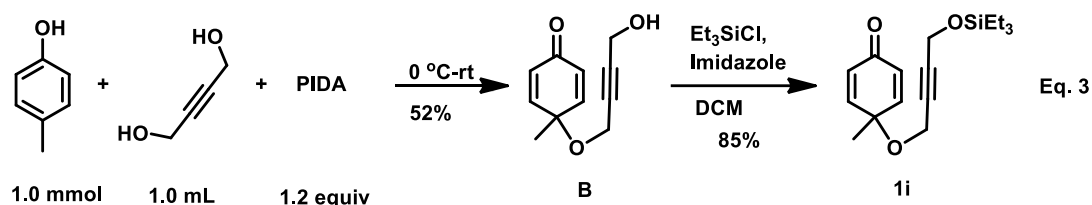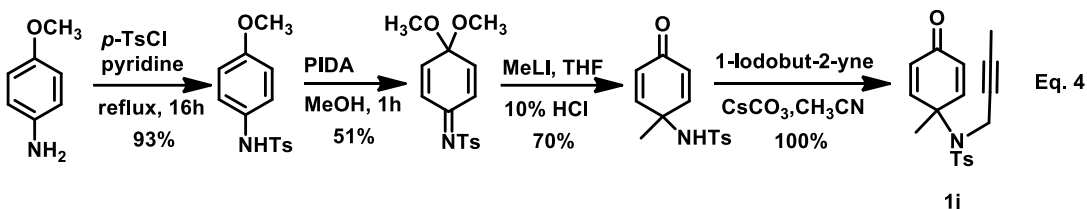

### Supplementary Figure 1. Synthesis of Alkynyl-cyclohexadienone

were washed with brine, dried over Na<sub>2</sub>SO<sub>4</sub>, filtered and concentrated under reduced pressure. The residue was purified by column chromatography (5–10% EtOAc in hexane) to give pure alkyne-cyclohexadienone **1**. Alkyne-cyclohexadienones **1a–1e**, **1h**, and **1j** were synthesized following the reported procedures.<sup>S2</sup> Compounds **1f**, **1g**, and **1i** were prepared according to experimental procedures, shown below.

#### Ethyl 4-(3-((1-methyl-4-oxocyclohexa-2,5-dien-1-yl)oxy)prop-1-yn-1-yl)benzoate (**1f**):

Alkyne-cyclohexadienone **1f** was synthesized in two steps following the equation 2 in Supplementary Figure 1. (Diacetoxyiodo)benzene (5.8 g, 18.0 mmol) was added portion wise to a stirred solution of *p*-cresol (1.6 g, 15.0 mmol) in propargyl alcohol (15.0 mL) at 0 °C, the solution

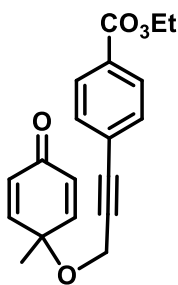

was warmed to room temperature and stirred for overnight. The reaction was quenched with saturated aqueous  $\text{NaHCO}_3$  solution (40 mL) and extracted with EtOAc ( $3 \times 30$  mL). The combined organic phases were washed with brine (40 mL). The combined organic layers were dried over  $\text{Na}_2\text{SO}_4$ , filtered, and concentrated under reduced pressure. The residue was purified by column chromatography (10% EtOAc in hexane) to give 4-methyl-4-(prop-2-yn-1-yloxy)cyclohexa-2,5-dien-1-one (**A**; 0.97 g, 5.99 mmol, 40%) as a pale yellow solid. The spectral data of **A** is matched with that of reported previously.<sup>8</sup> An oven-dried Schlenk flask containing stirrer bar was charged with  $\text{Pd}(\text{PPh}_3)_2\text{Cl}_2$  (39.1 mg, 0.06 mmol) and  $\text{CuI}$  (5.6 mg, 0.04 mmol) under  $\text{N}_2$ . A solution of alkyne-cyclohexadienone **A** (300.0 mg, 1.85 mmol) and ethyl 4-iodobenzoate (543.0 mg, 2.07 mmol) in  $\text{Et}_3\text{N}$  (10 mL) was added and the mixture was stirred at room temperature for 18 h. The mixture was diluted with EtOAc (25 mL) and washed with 10% aqueous HCl solution ( $2 \times 25$  mL). The combined organic layers were dried over  $\text{Na}_2\text{SO}_4$ , filtered and concentrated under reduced pressure. The residue was purified by silica gel flash chromatography (5–10% EtOAc in hexane) to give cyclohexadienone **1f** as a yellow amorphous solid (0.40 g, 1.3 mmol, 70%).  $R_f = 0.3$  (20% EtOAc in hexane).  $^1\text{H NMR}$  (400 MHz,  $\text{CDCl}_3$ )  $\delta$  7.96 (2H, d,  $J = 8.0$  Hz, ArH), 7.45 (2H, d,  $J = 8.0$  Hz, ArH), 6.87 (2H, d,  $J = 9.2$  Hz, CH=CHC), 6.34 (2H, d,  $J = 9.2$  Hz, CH=CHC), 4.35 (2H, q,  $J = 7.6$  Hz,  $\text{OCH}_2\text{CH}_3$ ), 4.22 (2H, s,  $\text{OCH}_2\text{C}$ ), 1.50 (3H, s,  $\text{CCH}_3$ ), 1.37 (3H, t,  $J = 7.6$  Hz,  $\text{CH}_2\text{CH}_3$ ).  $^{13}\text{C}\{^1\text{H}\}$  NMR (100 MHz,  $\text{CDCl}_3$ )  $\delta$  185.0, 165.9, 150.7, 131.5, 130.5, 130.2, 129.4, 126.8, 88.5, 86.0, 73.3, 61.1, 54.4, 26.3, 14.2. HRMS (CI<sup>+</sup>):  $m/z$  Calcd for  $\text{C}_{19}\text{H}_{19}\text{O}_4$ : ( $\text{M}+\text{H}^+$ ) 311.1283, found 311.1282.

#### 4-Methyl-4-((3-(4-(trifluoromethyl)phenyl)prop-2-yn-1-yl)oxy)cyclohexa-2,5-dien-1-one (**1g**):

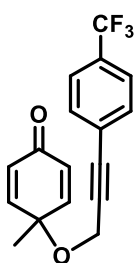

Alkynyl-cyclohexadienone **1g** was synthesized in two steps following the equation 2 in Supplementary Figure 1. First 4-methyl-4-(prop-2-yn-1-yloxy)cyclohexa-2,5-dien-1-one (**A**) was synthesized by following the above experimental procedure. An oven-dried Schlenk flask containing stirrer bar was charged with  $\text{Pd}(\text{PPh}_3)_2\text{Cl}_2$  (25.1 mg, 0.03 mmol) and  $\text{CuI}$  (3.0 mg, 0.02 mmol) under  $\text{N}_2$ . A solution of alkyne-cyclohexadienone **A** (200.0 mg, 1.23 mmol) and 1-iodo-4-(trifluoromethyl)benzene (367.6 mg, 1.35 mmol) in  $\text{Et}_3\text{N}$  (10 mL) was added and the mixture was stirred at room temperature for 18 h. The mixture was diluted with EtOAc (20 mL) and washed with 10% aqueous HCl solution ( $2 \times 20$  mL). The combined organic layers were dried over  $\text{Na}_2\text{SO}_4$ , filtered and concentrated under reduced pressure. The residue was purified by silica gel

flash chromatography (5% EtOAc in hexane) to give **1g** as a yellow amorphous solid (250 mg, 0.82 mmol, 67%).  $R_f = 0.4$  (20% EtOAc in hexane).  $^1\text{H NMR}$  (400 MHz,  $\text{CDCl}_3$ )  $\delta$  7.57 (2H, d,  $J = 8.4$  Hz, ArH), 7.51 (2H, d,  $J = 8.4$  Hz, ArH), 6.88 (2H, d,  $J = 9.2$  Hz, CH=CHC), 6.35 (2H, d,  $J = 9.2$  Hz, CH=CHC), 4.24 (2H, s,  $\text{OCH}_2\text{C}$ ), 1.52 (3H, s,  $\text{CCH}_3$ ).  $^{13}\text{C}\{^1\text{H}\}$  NMR (100 MHz,  $\text{CDCl}_3$ )  $\delta$  185.0, 150.7, 131.9, 130.6, 130.2, 125.1 (d,  $J_{\text{CF}} = 275.0$  Hz), 125.2 (q,  $J_{\text{CF}} = 4.0$  Hz), 88.1, 85.4, 73.3, 61.1, 54.4, 26.3. HRMS (CI+):  $m/z$  Calcd for  $\text{C}_{17}\text{H}_{14}\text{F}_3\text{O}_2$ : ( $\text{M}+\text{H}^+$ ) 307.0946, found 307.0947.

**4-Methyl-4-((4-((triethylsilyl)oxy)but-2-yn-1-yl)oxy)cyclohexa-2,5-dien-1-one (1i):** Alkynyl-

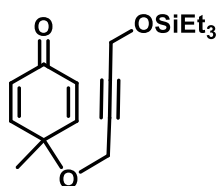

cyclohexadienone **1i** was synthesized in two steps following the equation 3 in Supplementary Figure 1. A flame-dried flask was charged with *p*-cresol (1.10 g, 10.0 mmol),  $\text{CH}_3\text{CN}$  (10 mL) and 1,4-butyne-1,3-diol (4.30 g, 50.0 mmol). A solution of  $\text{PhI}(\text{OAc})_2$  (4.80 g, 15.0 mmol, dissolved in 40 mL  $\text{CH}_2\text{Cl}_2$ ) was added dropwise to the reaction pot over 2 h. The reaction mixture was allowed

to stir at room temperature for 1 h. The solution was concentrated under vacuo and the residue was purified by column silica gel flash chromatography (50% EtOAc in hexane) to give pure alkynol-cyclohexadienone **B** as a yellow amorphous solid (1.0 g, 5.2 mmol, 52%).  $R_f = 0.2$  (50% EtOAc in hexane).  $^1\text{H NMR}$  (400 MHz,  $\text{CDCl}_3$ )  $\delta$  6.82 (2H, d,  $J = 10.2$  Hz, CH=CHC), 6.31 (2H, d,  $J = 10.2$  Hz, CH=CHC), 4.29 (2H, br s,  $\text{CH}_2\text{OH}$ ), 4.03 (2H, t,  $J = 1.9$  Hz,  $\text{OCH}_2\text{C}$ ), 1.47 (3H, s,  $\text{CCH}_3$ ). The primary alcohol **B** (280.0 mg, 1.2 mmol) and imidazole (0.24 g, 3.5 mmol) were taken to two neck flask and dissolved in DCM (10 mL). Chlorotriethylsilane (0.39 g, 0.24 mmol) was then added dropwise to the stirring solution at 0 °C. The reaction mixture was allowed to warm to room temperature for overnight. The mixture was quenched with water (20 mL) and partitioned by separating funnel. Aqueous layer was washed with DCM (2 x 20 mL). The combined organic layers were dried over  $\text{Na}_2\text{SO}_4$ , filtered and concentrated under reduced pressure. The residue was purified by silica gel flash chromatography (5% EtOAc in hexane) to give cyclohexadienone **1i** as a yellow amorphous solid (310.0 g, 1.1 mmol, 84%).  $R_f = 0.4$  (10% EtOAc in hexane);  $^1\text{H NMR}$  (400 MHz,  $\text{CDCl}_3$ )  $\delta$  6.82 (2H, d,  $J = 10.2$  Hz, CH=CHC), 6.29 (2H, d,  $J = 10.2$  Hz, CH=CHC), 4.31 (2H, d,  $J = 1.8$  Hz,  $\text{CCH}_2\text{OSi}$ ), 4.01 (2H, d,  $J = 1.8$  Hz,  $\text{OCH}_2\text{C}$ ), 1.46 (3H, s,  $\text{CCH}_3$ ), 0.96 (9H, t,  $J = 8.0$  Hz,  $\text{SiCH}_2\text{CH}_3$ ), 0.61 (6H, q,  $J = 8.0$  Hz,  $\text{SiCH}_2\text{CH}_3$ ).  $^{13}\text{C}\{^1\text{H}\}$  NMR (100 MHz,  $\text{CDCl}_3$ )  $\delta$  184.8, 150.7, 130.3, 85.3, 81.1, 73.0, 53.9, 51.2, 26.2, 6.5, 4.3. HRMS (EI):  $m/z$  Calcd for  $\text{C}_{17}\text{H}_{26}\text{O}_3\text{Si}$ : ( $\text{M}^+$ ) 307.1729, found 307.1728.

## Evaluation of catalytic reaction conditions (Supplementary Table 1)

**General method for the catalytic racemic reactions (Entries 1–4):** In glove box, a vial was charged with phosphine (20 mol%) or IPr (10 mol%) and Ni(cod)<sub>2</sub> (2.75 mg, 0.01 mmol, 10 mol%) in C<sub>6</sub>D<sub>6</sub> (0.5 mL). After 10 min of stirring, a mixture of 4-(but-2-yn-1-yloxy)-4-methylcyclohexa-2,5-dien-1-one (**1a**, 17.6 mg, 0.1 mmol) and (*E*)-3-(4-methoxyphenyl)-1-phenylprop-2-en-1-one (**2a**, 23.8 mg, 0.12 mmol) in C<sub>6</sub>D<sub>6</sub> (0.5 mL) was

**Supplementary Table 1. Evaluation of catalytic reaction conditions**

10 mol% L<sup>n</sup>  
10 mol% NaO<sup>t</sup>Bu  
10 mol% Ni(cod)<sub>2</sub>  
solvent

| entry          | ligand           | special conditions             | sovent                        | base                | temp (°C) | time (h) | yield (%) | ee (%) |
|----------------|------------------|--------------------------------|-------------------------------|---------------------|-----------|----------|-----------|--------|
| 1 <sup>a</sup> | PCy <sub>3</sub> | 20 mol% PCy <sub>3</sub>       | C <sub>6</sub> D <sub>6</sub> | –                   | rt        | 72       | 0         | –      |
| 2 <sup>a</sup> | IPr              | –                              | C <sub>6</sub> D <sub>6</sub> | –                   | rt        | 11       | 58        | –      |
| 3              | IPr              | –                              | C <sub>6</sub> D <sub>6</sub> | –                   | rt        | 20       | 96        | –      |
| 4              | IPr              | no Ni(cod) <sub>2</sub>        | C <sub>6</sub> D <sub>6</sub> | –                   | rt        | 24       | 0         | –      |
| 5              | L*1              | –                              | C <sub>6</sub> D <sub>6</sub> | NaO <sup>t</sup> Bu | rt        | 72       | 0         | –      |
| 6              | L*2              | –                              | C <sub>6</sub> D <sub>6</sub> | NaO <sup>t</sup> Bu | rt        | 72       | 0         | –      |
| 7 <sup>b</sup> | L*3              | –                              | C <sub>6</sub> D <sub>6</sub> | NaO <sup>t</sup> Bu | rt        | 72       | 13        | 94     |
| 8              | L*4              | –                              | C <sub>6</sub> D <sub>6</sub> | NaO <sup>t</sup> Bu | rt        | 72       | 0         | –      |
| 9              | L*5              | –                              | C <sub>6</sub> D <sub>6</sub> | NaO <sup>t</sup> Bu | rt        | 72       | 0         | –      |
| 10             | L*6              | –                              | C <sub>6</sub> D <sub>6</sub> | NaO <sup>t</sup> Bu | rt        | 36       | 36        | 98     |
| 11             | L*7              | –                              | C <sub>6</sub> D <sub>6</sub> | NaO <sup>t</sup> Bu | rt        | 36       | 48        | 89     |
| 12             | L*6              | –                              | benzene                       | KO <sup>t</sup> Bu  | rt        | 36       | 29        | 98     |
| 13             | L*6              | –                              | benzene                       | LiO <sup>t</sup> Bu | rt        | 36       | 29        | 98     |
| 14             | L*6              | –                              | benzene                       | NaHMDS              | rt        | 36       | 40        | 96     |
| 15             | L*6              | –                              | toluene                       | NaO <sup>t</sup> Bu | rt        | 36       | 41        | 97     |
| 16             | L*6              | –                              | DMSO                          | NaO <sup>t</sup> Bu | rt        | 36       | 7         | 96     |
| 17             | L*6              | –                              | CF <sub>3</sub> -toluene      | NaO <sup>t</sup> Bu | rt        | 36       | 24        | 98     |
| 18             | L*6              | –                              | THF                           | NaO <sup>t</sup> Bu | rt        | 36       | 30        | 97     |
| 19             | L*6              | –                              | DMF                           | NaO <sup>t</sup> Bu | rt        | 36       | 8         | 97     |
| 20             | L*6              | –                              | <i>o</i> -Xylene              | NaO <sup>t</sup> Bu | rt        | 36       | 36        | 97     |
| 21             | L*6              | –                              | CPME                          | NaO <sup>t</sup> Bu | rt        | 36       | 19        | 97     |
| 22             | L*6              | 0.5 mL solvent                 | toluene                       | NaO <sup>t</sup> Bu | rt        | 36       | 32        | 96     |
| 23             | L*6              | 3.0 mL solvent                 | toluene                       | NaO <sup>t</sup> Bu | 60        | 36       | 51        | 98     |
| 24             | L*6              | 5.0 mL solvent                 | toluene                       | NaO <sup>t</sup> Bu | rt        | 36       | 68        | 99     |
| 25             | L*6              | 10.0 mL solvent                | toluene                       | NaO <sup>t</sup> Bu | rt        | 36       | 67        | 99     |
| 26             | L*6              | 5.0 mL solvent                 | toluene                       | NaO <sup>t</sup> Bu | 60        | 36       | 74        | 98     |
| 27             | L*6              | 5.0 mL solvent,<br>5 mol% cat. | toluene                       | NaO <sup>t</sup> Bu | 60        | 36       | 61        | 98     |

Chiral NHC imidazolium salts

General conditions. Reaction was conducted with **1a** (0.12 mmol), **2a** (0.10 mmol), and solvent (1.0 mL). Isolated yields are given and enantioselectivity was determined by SFC equipped with a chiral stationary phase. <sup>a</sup>1.2 Equiv of **2a** was employed. <sup>b</sup>Yield and ee were measured at 27% conversion of **1a**. Cy = Cyclohexyl, CPME = Cyclopentylmethyl ether.

added and transferred to a J. Young NMR tube. The progress of reaction was monitored by  $^1\text{H}$  NMR. After consumption of **1a**, reaction mixture was filtered through a small pad of silica, washed with diethylether, concentrated under vacuum. The residue was purified by silica gel flash chromatography (10% EtOAc in hexane) to get pure *rac*-**3aa** as a white amorphous solid.  $R_f = 0.3$  (20% EtOAc in hexane). The structure of **3aa** was confirmed by 1D and 2D spectral analyses. IPr was effective ligand to afford *rac*-**3aa** in 58% yield (entry 2). However, 96% yield was obtained, when 1.2 equiv. of **1a** was used (entry 3).

**Controlled Experiment:** Reaction didn't proceed in the absence of  $\text{Ni}(\text{cod})_2$  (entry 4).

**General method for the catalytic enantioselective reactions:** A screw cap vial in the globe box was charged with  $\text{L}^*\text{n}\cdot\text{HBF}_4$  (0.01 mmol, 10 mol%) and  $\text{NaO}^t\text{Bu}$  (0.01 mmol, 10 mol%) in toluene or  $\text{C}_6\text{D}_6$  (0.5 mL). After 10 min of stirring,  $\text{Ni}(\text{cod})_2$  (0.01 mmol, 10 mol%) was added. To the stirring solution was added a mixture of 4-(but-2-yn-1-yloxy)-4-methylcyclohexa-2,5-dien-1-one (**1a**, 0.12 mmol) and (*E*)-3-(4-methoxyphenyl)-1-phenylprop-2-en-1-one (**2a**, 0.10 mmol) in toluene or  $\text{C}_6\text{D}_6$  (0.5 mL) and stirred at room temperature for 36–72 h. The progress of reaction was monitored by TLC or NMR. After the consumption of **1a**, reaction mixture was filtered through a small pad of silica, washed with diethylether, and concentrated under vacuum. The residue was purified by silica gel flash chromatography (10% EtOAc in hexane) to get pure *enantioenriched*-**3aa** as a white amorphous solid. The absolute configuration of all five chiral centers in **3aa** was assigned by according to an analogy to **3ij**, determined unambiguously by X-ray crystallography (*vide infra*).

**Entries 5–11:** Screening of  $\text{C}_2$ -chiral NHC imidazolium salts ( $\text{L}^*\text{1}$ – $\text{L}^*\text{7}\cdot\text{HBF}_4$ )

( $\text{L}^*\text{6}\cdot\text{HBF}_4$  gave the best enantioselectivity among them; entry 10).

**Entries 12–14:** Different bases were examined using  $\text{L}^*\text{6}\cdot\text{HBF}_4$ .

**Entries 15–21:** Different solvents were examined using  $\text{L}^*\text{6}\cdot\text{HBF}_4$ .

**Entries 22–25:** Reactions were studied at dilute conditions using  $\text{L}^*\text{6}\cdot\text{HBF}_4$  to retard oligomerization of **1a**, which was a major side reaction in this transformation.

**Optimized conditions for the study of scope and limitations (entry 26):** To a screw cap vial in a glove box was added  $\text{L}^*\text{6}\cdot\text{HBF}_4$  (16.3 mg, 0.02 mmol, 10 mol%) and  $\text{NaO}^t\text{Bu}$  (1.9 mg, 0.02 mmol, 10 mol%) in toluene (5 mL) and the suspension was allowed to stir at room temperature for 10 minutes and then  $\text{Ni}(\text{cod})_2$  (5.5 mg, 0.02 mmol, 10 mol%) was added. After further stirring for 10 minutes at room temperature was added a solution of alkynyl-cyclohexadienone (**1**, 0.24 mmol, 1.2 eq) and enone (**2**, 0.20 mmol) in toluene (10 mL). The reaction mixture was taken out of glove box

and heated at 60 °C for 36 h with stirring. The reaction mixture was cooled to room temperature and filtered after the consumption of **1** and washed with Et<sub>2</sub>O. The filtrate was concentrated in vacuo, and the residue was purified by silica gel flash chromatography (SiO<sub>2</sub>, eluted with 5 to 20% ethyl acetate in hexane) to get pure *enantioenriched-3*.

**Entry 27:** Reaction was carried out with 5 mol% of **L\*6**·HBF<sub>4</sub>, NaO<sup>t</sup>Bu, and Ni(cod)<sub>2</sub>.

### Spectral data of chiral tricyclic products **3**

(2a<sup>1S,4S,5R,5aR,8aS</sup>)-5-Benzoyl-4-(4-methoxyphenyl)-3,8a-dimethyl-2,2a<sup>1</sup>,4,5,5a,8a-hexahydro-6H-naphtho[1,8-*bc*]furan-6-one (**3aa**):

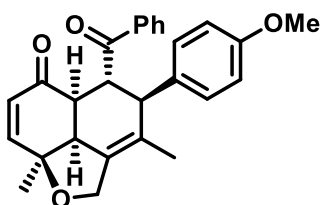

Following the general procedure, (*R,R*)-**L\*6**·HBF<sub>4</sub> (16.0 mg, 0.02 mmol), NaO<sup>t</sup>Bu (2.0 mg, 0.02 mmol), Ni(cod)<sub>2</sub> (5.5 mg, 0.02 mmol), 4-(but-2-yn-1-yloxy)-4-methylcyclohexa-2,5-dien-1-one (**1a**, 42.2 mg, 0.24 mmol) and (*E*)-3-(4-methoxyphenyl)-1-phenylprop-2-en-1-one (**2a**, 47.6 mg, 0.2 mmol) were used. Purification by silica gel flash column chromatography (10% EtOAc in hexane) gave **3aa** (61.0 mg, 0.157 mmol, 74% yield) as a white solid. *R*<sub>f</sub> = 0.3 (20% EtOAc in hexane). <sup>1</sup>H NMR (400 MHz, CDCl<sub>3</sub>) δ 7.99 (2H, d, *J* = 7.6 Hz, benzoyl-*ortho*-Ar-*H*), 7.56 (1H, dd, *J* = 7.6, 7.6 Hz, benzoyl-*para*-Ar-*H*), 7.44 (2H, dd, *J* = 7.6, 7.6 Hz, benzoyl-*meta*-Ar-*H*), 6.88 (2H, d, *J* = 8.6 Hz, Ar-*H*), 6.79 (2H, d, *J* = 8.6 Hz, Ar-*H*), 6.58 (1H, dd, *J* = 10.2, 2.0 Hz, CH=CHCO), 5.98 (1H, d, *J* = 10.2 Hz, CH=CHCO), 4.88 (1H, br s, CHCOPh), 4.57 (1H, d, *J* = 13.5 Hz, OCH<sub>2</sub>C), 4.33 (1H, d, *J* = 13.5 Hz, OCH<sub>2</sub>C), 3.80 (1H, br s, CCH-anisyl), 3.78 (3H, s, OCH<sub>3</sub>), 2.93 (1H, dd, *J* = 5.8, 1.2 Hz, CH=CHCOCHCH), 2.76 (1H, s, CCHC=CH), 1.45 (3H, s, CCH<sub>3</sub>), 1.39 (3H, s, C=CCH<sub>3</sub>). <sup>13</sup>C{<sup>1</sup>H} NMR (100 MHz, CDCl<sub>3</sub>) δ 201.5, 195.4, 158.2, 151.8, 135.6, 135.2, 133.7, 133.3, 130.1, 128.9, 128.8, 128.2, 126.6, 113.6, 80.1, 68.6, 55.1, 49.6, 44.2, 44.0, 42.9, 24.1, 18.1. HRMS (ED): *m/z* Calcd for C<sub>27</sub>H<sub>26</sub>O<sub>4</sub>: (M<sup>+</sup>) 414.1831, found 414.1835. [α]<sub>D</sub><sup>23</sup> = (+) 177.3 (*c* = 0.11, in CHCl<sub>3</sub>). **Chiral separation** (98% ee): The enantioselectivity was determined by SFC using Chiralpak IA (Back pressure = 15 MPa, Flow (CO<sub>2</sub>) = 2.4 mL/min, Flow (isopropanol) = 0.6 mL/min, 25 °C, λ = 250 nm). Retention time: *t*<sub>R</sub> = 2.6 min (minor enantiomer) and 4.4 min (major enantiomer).

A half-gram scale reaction of **1a** (0.53 g, 3.0 mmol) was carried out with **2a** (0.6 g, 2.5 mmol), giving almost same results (0.76 g, 1.83 mmol, 73% yield, 98% ee).



(2a<sup>1</sup>S,4S,5R,5aR,8aS)-5-Benzoyl-3,8a-dimethyl-4-phenyl-2,2a<sup>1</sup>,4,5,5a,8a-hexahydro-6H-naphtho[1,8-bc]furan-6-one (**3ab**):

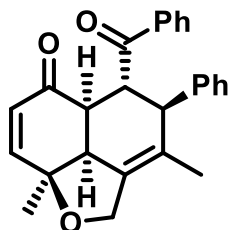

Following the general procedure, (*R,R*)-**L\*6**·HBF<sub>4</sub> (16.2 mg, 0.02 mmol), NaO<sup>t</sup>Bu (2.0 mg, 0.02 mmol), Ni(cod)<sub>2</sub> (5.4 mg, 0.02 mmol), 4-(but-2-yn-1-yloxy)-4-methylcyclohexa-2,5-dien-1-one (**1a**, 42.0 mg, 0.24 mmol) and chalcone (**2b**, 41.6 mg, 0.2 mmol) were used. Purification by silica gel flash column chromatography (5% EtOAc in hexane) gave **3ab** (56.0 mg, 0.145 mmol, 73% yield) as a white amorphous solid. *R*<sub>f</sub> = 0.4 (20% EtOAc in hexane). <sup>1</sup>H NMR (400 MHz, CDCl<sub>3</sub>) δ 7.99 (2H, d, *J* = 7.6 Hz, benzoyl-*ortho*-Ar-*H*), 7.55 (1H, dd, *J* = 7.6, 7.6 Hz, benzoyl-*para*-Ar-*H*), 7.43 (2H, dd, *J* = 7.6, 7.6 Hz, benzoyl-*meta*-Ar-*H*), 7.17–7.27 (3H, m, Ar-*H*), 6.97 (2H, d, *J* = 7.6 Hz, Ar-*H*), 6.58 (1H, dd, *J* = 10.2, 2.0 Hz, CH=CHCO), 5.98 (1H, d, *J* = 10.2 Hz, CH=CHCO), 4.90 (1H, s, CHCOPh), 4.57 (1H, d, *J* = 13.2 Hz, OCH<sub>2</sub>C), 4.34 (1H, d, *J* = 13.2 Hz, OCH<sub>2</sub>C), 3.86 (1H, s, CCH-Ph), 2.95 (1H, d, *J* = 5.2 Hz, CH=CHCOCHCH), 2.76 (1H, s, CCHC=CH), 1.44 (3H, s, CCH<sub>3</sub>), 1.41 (3H, s, C=CCH<sub>3</sub>). <sup>13</sup>C{<sup>1</sup>H} NMR (100 MHz, CDCl<sub>3</sub>) δ 201.3, 195.2, 151.7, 143.5, 135.2, 133.9, 133.3, 129.1, 128.9, 128.8, 128.3, 128.2, 126.6, 126.3, 80.1, 68.5, 49.5, 44.9, 44.1, 42.9, 24.1, 18.1. HRMS (EI): *m/z* Calcd for C<sub>26</sub>H<sub>24</sub>O<sub>3</sub>: (M<sup>+</sup>) 384.1725, found 384.1726. [α]<sub>D</sub><sup>23</sup> = (+) 204.6 (*c* = 0.17, in CHCl<sub>3</sub>). **Chiral separation** (98% ee): The enantioselectivity was determined by SFC using Chiralpak IA (Back pressure = 15 MPa, Flow (CO<sub>2</sub>) = 3.0 mL/min, Flow (isopropanol) = 0.3 mL/min, 25 °C, λ = 250 nm). Retention time: *t*<sub>R</sub> = 3.8 min (minor enantiomer) and 6.1 min (major enantiomer).

(2a<sup>1</sup>S,4S,5R,5aR,8aS)-5-Benzoyl-4-(4-fluorophenyl)-3,8a-dimethyl-2,2a<sup>1</sup>,4,5,5a,8a-hexahydro-6H-naphtho[1,8-bc]furan-6-one (**3ac**):

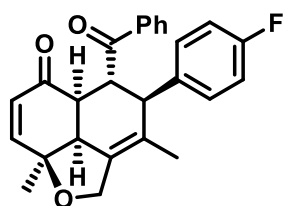

Following the general procedure, (*R,R*)-**L\*6**·HBF<sub>4</sub> (16.4 mg, 0.02 mmol), NaO<sup>t</sup>Bu (2.0 mg, 0.02 mmol), Ni(cod)<sub>2</sub> (5.5 mg, 0.02 mmol), 4-(but-2-yn-1-yloxy)-4-methylcyclohexa-2,5-dien-1-one (**1a**, 42.2 mg, 0.24 mmol) and (*E*)-3-(4-fluorophenyl)-1-phenylprop-2-en-1-one (**2c**, 45.2 mg, 0.2 mmol) were used. Purification by silica gel flash column chromatography (5% EtOAc in hexane) gave **3ac** (58.0 mg, 0.144 mmol, 72% yield) as thick oil. *R*<sub>f</sub> = 0.4 (20% EtOAc in hexane). <sup>1</sup>H NMR (400 MHz, CDCl<sub>3</sub>) δ 7.98 (2H, d, *J* = 7.6 Hz, benzoyl-*ortho*-Ar-*H*), 7.57 (1H, dd, *J* = 7.6, 7.6 Hz, benzoyl-*para*-Ar-*H*), 7.45 (2H, dd, *J* = 7.6, 7.6 Hz, benzoyl-*meta*-Ar-*H*), 6.94 (4H, d, *J* = 7.6 Hz, Ar-*H*), 6.59 (1H, d, *J* = 10.2 Hz, CH=CHCO), 5.98 (1H, d, *J* = 10.2 Hz, CH=CHCO), 4.87 (1H, s, CHCOPh), 4.58 (1H, d, *J* = 13.2 Hz, OCH<sub>2</sub>C), 4.34 (1H, d, *J* = 13.2 Hz, OCH<sub>2</sub>C), 3.86 (1H, s, CCHAr), 2.95 (1H, d, *J* = 5.2 Hz,

CH=CHCOCHCH), 2.74 (1H, s, CCHC=CH), 1.45 (3H, s, CCH<sub>3</sub>), 1.39 (3H, s, C=CCH<sub>3</sub>). <sup>13</sup>C{<sup>1</sup>H} NMR (100 MHz, CDCl<sub>3</sub>) δ 201.1, 195.3, 151.9, 135.1, 134.2, 133.5, 130.6, 130.5, 128.9, 128.8, 128.2, 126.1, 115.3, 115.1, 80.1, 68.5, 49.5, 44.12, 44.08, 43.0, 24.0, 18.1. **HRMS** (ED): *m/z* Calcd for C<sub>26</sub>H<sub>23</sub>FO<sub>3</sub>: (M<sup>+</sup>) 402.1631, found 402.1628. [α]<sub>D</sub><sup>20</sup> = (+) 135.3 (*c* = 0.13, in CHCl<sub>3</sub>). **Chiral separation** (98% ee): The enantioselectivity was determined by SFC using Chiralpak IA (Back pressure = 15 MPa, Flow (CO<sub>2</sub>) = 3.0 mL/min, Flow (isopropanol) = 0.3 mL/min, 25 °C, λ = 250 nm). Retention time: *t*<sub>R</sub> = 3.3 min (minor enantiomer) and 4.7 min (major enantiomer).

**(2a<sup>1</sup>S,4S,5R,5aR,8aS)-5-benzoyl-4-(4-fluorophenyl)-3,8a-dimethyl-2,2a1,4,5,5a,8a-hexahydro-6**

**H-naphtho[1,8-bc]furan-6-one (3ad):** Following the general procedure, (*R,R*)-L\*6·HBF<sub>4</sub> (8.1 mg,

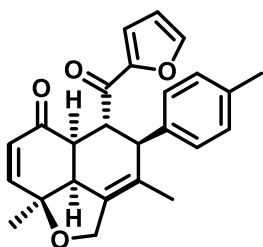

0.01 mmol), and NaO<sup>t</sup>Bu (1.0 mg, 0.01 mmol), Ni(cod)<sub>2</sub> (2.76 mg, 0.01 mmol), 4-(but-2-yn-1-yloxy)-4-methylcyclohexa-2,5-dien-1-one (**1a**, 21.0 mg, 0.12 mmol), and (*E*)-1-(furan-2-yl)-3-(*p*-tolyl)prop-2-en-1-one (**2d**, 21.0 mg, 0.1 mmol), were used. Purification by column chromatography (15% EtOAc in hexane) gave **3ad** (28.0 mg, 0.072 mmol, 72%) as colorless oil. *R*<sub>f</sub> = 0.3 (20% EtOAc in hexane). <sup>1</sup>H NMR (400 MHz,

CDCl<sub>3</sub>): δ 7.59 (1H, d, 1.0 Hz, Furyl-*H*), 7.23 (1H, d, *J* = 3.5 Hz, Furyl-Ar-*H*), 7.06 (2H, d, *J* = 7.9 Hz, Ar-*H*), 6.87 (2H, d, *J* = 7.9 Hz, Ar-*H*), 6.58 (1H, dd, *J* = 10.2, 1.7 Hz, CH=CHCO), 6.50 (1H, dd, *J* = 3.5, 1.7 Hz, Furyl-Ar-*H*), 5.97 (1H, d, *J* = 10.2 Hz, CH=CHCO), 4.61 (1H, dd, *J* = 2.5, 1.7 Hz, CHCOPh), 4.57 (1H, d, *J* = 13.1 Hz, OCH<sub>2</sub>C), 4.33 (1H, d, *J* = 13.1 Hz, OCH<sub>2</sub>C), 3.75 (1H, br s, CCHAr), 2.94 (1H, dd, *J* = 5.9, 1.4 Hz, CH=CHCOCHCH), 2.88 (1H, br s, CCHC=CH), 2.30 (3H, s, Ar-CH<sub>3</sub>), 1.49 (3H, s, CCH<sub>3</sub>), 1.38 (3H, s, C=CCH<sub>3</sub>). <sup>13</sup>C NMR (100 MHz, CDCl<sub>3</sub>): δ 195.1, 190.2, 151.5, 151.2, 147.0, 140.2, 136.0, 134.1, 128.9, 128.2, 126.2, 118.9, 112.3, 80.1, 68.5, 49.9, 44.2, 44.1, 43.2, 24.1, 21.0, 18.1. **HRMS** (EI<sup>+</sup>): *m/z* Calcd for C<sub>25</sub>H<sub>24</sub>O<sub>4</sub>: (M<sup>+</sup>) 388.1675, found 388.1678. [α]<sub>D</sub><sup>20</sup> = (+) 160.3 (*c* = 0.24, in CHCl<sub>3</sub>). **Chiral separation** (99% ee): The enantioselectivity was determined by SFC using Chiralpak IA (Back pressure = 15 MPa, Flow (CO<sub>2</sub>) = 3.0 mL/min, Flow (isopropanol) = 0.3 mL/min, 40 °C, λ = 250 nm). Retention time: *t*<sub>R</sub> = 4.6 min (minor enantiomer) and 5.0 min (major enantiomer).

**(2a<sup>1</sup>S,4S,5R,5aR,8aS)-5-Benzoyl-3,4,8a-trimethyl-2,2a1,4,5,5a,8a-hexahydro-6H-naphtho[1,8-b**

**c]furan-6-one (3ae):** Following the general procedure, (*R,R*)-L\*6·HBF<sub>4</sub> (8.2 mg, 0.01 mmol), and NaO<sup>t</sup>Bu (1.0 mg, 0.01 mmol), Ni(cod)<sub>2</sub> (2.75 mg, 0.01 mmol), 4-(but-2-yn-1-yloxy)-4-methylcyclohexa-2,5-dien-1-one (**1a**, 21.0 mg, 0.12 mmol), and

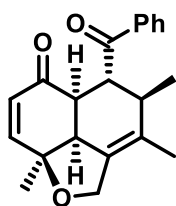

(*E*)-1-phenylbut-2-en-1-one (**2e**, 14.8 mg, 0.1 mmol), were used. Purification by column chromatography (5% EtOAc in hexane) gave **3ad** (20.0 mg, 0.062 mmol, 62%) as colorless oil.  $R_f = 0.3$  (20% EtOAc in hexane).  $^1\text{H NMR}$  (400 MHz,  $\text{CDCl}_3$ ):  $\delta$  8.04 (2H, d, 7.6 Hz, benzoyl-*ortho*-Ar-*H*), 7.59 (1H, dd,  $J = 7.2, 7.2$  Hz, benzoyl-*para*-Ar-*H*), 7.49 (2H, dd,  $J = 8.0, 8.0$  Hz, benzoyl-*meta*-Ar-*H*), 6.52 (1H, dd,  $J = 10.0, 2.0$  Hz,  $\text{CH}=\text{CHCO}$ ), 5.91 (1H, d,  $J = 10.0$  Hz,  $\text{CH}=\text{CHCO}$ ), 4.59 (1H, dd,  $J = 1.6, 1.6$  Hz,  $\text{CHCOPh}$ ), 4.49 (1H, d,  $J = 13.2$  Hz,  $\text{OCH}_2\text{C}$ ), 4.22 (1H, d,  $J = 13.2$  Hz,  $\text{OCH}_2\text{C}$ ), 2.94 (1H, dd,  $J = 6.0, 1.8$  Hz,  $\text{CH}=\text{CHCOCHCH}$ ), 2.72 (1H, br s,  $\text{CCHC}=\text{CH}$ ), 2.60 (1H, br s,  $\text{CCHCH}_3$ ), 1.58 (3H, br s,  $\text{C}=\text{CCH}_3$ ), 1.41 (3H, s,  $\text{CCH}_3$ ), 1.12 (3H, d,  $J = 7.6$  Hz,  $\text{CHCH}_3$ ).  $^{13}\text{C NMR}$  (100 MHz,  $\text{CDCl}_3$ ):  $\delta$  202.0, 196.3, 151.9, 135.6, 133.2, 131.2, 128.9, 128.5, 128.3, 128.0, 80.0, 68.6, 48.2, 43.9, 42.2, 33.4, 24.0, 20.6, 17.2. **HRMS** (EI+):  $m/z$  Calcd for  $\text{C}_{21}\text{H}_{22}\text{O}_3$ : ( $\text{M}^+$ ) 322.1569, found 322.1571.  $[\alpha]_D^{20} = (+) 73.0$  ( $c = 0.34$ , in  $\text{CHCl}_3$ ). **Chiral separation** (97% ee): The enantioselectivity was determined by SFC using Chiralpak IA (Back pressure = 15 MPa, Flow ( $\text{CO}_2$ ) = 2.4 mL/min, Flow (isopropanol) = 0.6 mL/min, 25 °C,  $\lambda = 250$  nm). Retention time:  $t_R = 2.0$  min (minor enantiomer) and 2.5 min (major enantiomer).

The fully-intermolecular [2+2+2] cycloaddition product (**3ae'**) was eluted with 15% EtOAc in hexane (3.8 mg).  $R_f = 0.2$  (20% EtOAc in hexane).  $^1\text{H NMR}$  (400 MHz,  $\text{CDCl}_3$ ):  $\delta$  7.99

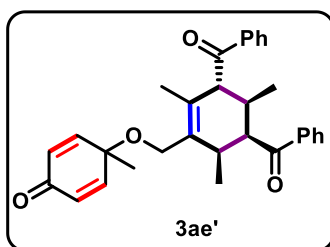

(2H, d,  $J = 8.2$  Hz, benzoyl-*ortho*-Ar-*H*), 7.86 (2H, d,  $J = 8.2$  Hz, benzoyl-*ortho*-Ar-*H*), 7.42–7.59 (6H, m, Ph-*H*), 6.86 (2H, td,  $J = 2.5, 10.2$  Hz,  $\text{CH}=\text{CHCO}$ ), 6.30 (2H, d,  $J = 10.2$  Hz,  $\text{CH}=\text{CHCO}$ ), 4.12 (1H, br s,  $\text{C}=\text{CCHCOPh}$ ), 3.94 (2H, br s,  $\text{OCH}_2\text{C}$ ), 3.86 (1H, dd,  $J = 3.4, 6.0$  Hz,  $\text{CHCHCOPh}$ ), 2.98 (1H, t,  $J = 6.8$  Hz,  $\text{C}=\text{CCHCH}_3$ ), 2.51–2.54 (1H, m,  $\text{CHCHCH}_3$ ), 1.60 (3H, d,  $J = 1.6$  Hz,  $\text{C}=\text{CCH}_3$ ), 1.42 (3H, s,  $\text{CCH}_3$ ), 1.19 (3H, d,  $J = 7.3$  Hz,  $\text{CHCHCH}_3$ ), 0.96 (3H, d,  $J = 7.3$  Hz,  $\text{C}=\text{CCHCH}_3$ ).  $^{13}\text{C NMR}$  (100 MHz,  $\text{CDCl}_3$ ):  $\delta$  203.7, 202.5, 185.3, 152.4, 152.3, 138.6, 137.2, 133.5, 133.3, 132.7, 130.0, 129.8, 129.3, 128.8, 128.6, 128.4, 128.0, 72.5, 63.5, 56.0, 46.3, 34.4, 33.1, 26.5, 19.3, 18.7, 15.7. **HRMS** (EI+):  $m/z$  Calcd for  $\text{C}_{31}\text{H}_{32}\text{O}_4$ : ( $\text{M}^+$ ) 468.2301, found 468.2306.

(**2a<sup>1</sup>S,4S,5R,5aR,8aS**)-(4-Methoxybenzoyl)-3,4,8a-trimethyl-2,2a<sup>1</sup>,4,5,5a,8a-hexahydro-6H-naphtho[1,8-*bc*]furan-6-one (**3af**): Following the general procedure, (*R,R*)-**L\*6**· $\text{HBF}_4$  (8.1 mg, 0.01 mmol),  $\text{NaO}^t\text{Bu}$  (1.0 mg, 0.01 mmol),  $\text{Ni}(\text{cod})_2$  (2.75 mg, 0.01 mmol), 4-(but-2-yn-1-yloxy)-4-methylcyclohexa-2,5-dien-1-one (**1a**, 21.0 mg, 0.12 mmol) and (*E*)-1-(4-methoxyphenyl)but-2-en-1-one (**2f**, 17.6 mg, 0.1 mmol) were used. Purification by

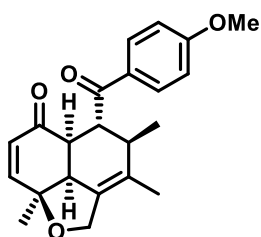

silica gel flash column chromatography (5–10% EtOAc in hexane) gave **3af** (22.9 mg, 0.065 mmol, 65% yield) as thick oil.  $R_f = 0.3$  (20% EtOAc in hexane).  $^1\text{H NMR}$  (400 MHz,  $\text{CDCl}_3$ ):  $\delta$  8.03 (2H, d, 8.3 Hz, benzoyl-*ortho*-Ar-*H*), 6.96 (2H, d,  $J = 8.3$  Hz, benzoyl-*meta*-Ar-*H*), 6.52 (1H, d,  $J = 10.4$  Hz,  $\text{CH}=\text{CHCO}$ ), 5.90 (1H, d,  $J = 10.4$  Hz,  $\text{CH}=\text{CHCO}$ ), 4.54 (1H, s,  $\text{CHCOPh}$ ), 4.51 (1H, d,  $J = 12.8$  Hz,  $\text{OCH}_2\text{C}$ ), 4.21 (1H, d,  $J = 12.8$  Hz,  $\text{OCH}_2\text{C}$ ), 3.87 (3H, s,  $\text{OCH}_3$ ), 2.90 (1H, d,  $J = 6.1$  Hz,  $\text{CH}=\text{CHCOCHCH}$ ), 2.73 (1H, br s,  $\text{CCHC}=\text{CH}$ ), 2.59 (1H, br s,  $\text{CCHCH}_3$ ), 1.57 (3H, br s,  $\text{CCH}_3$ ), 1.41 (3H, s,  $\text{C}=\text{CCH}_3$ ), 1.10 (3H, d,  $J = 7.8$  Hz,  $\text{CHCH}_3$ ).  $^{13}\text{C NMR}$  (100 MHz,  $\text{CDCl}_3$ ):  $\delta$  200.5, 196.5, 163.6, 151.9, 131.2, 130.9 (two carbons), 128.4, 128.0, 114.0, 80.0, 68.6, 55.5, 47.8, 43.9, 42.6, 33.5, 24.0, 20.6, 17.2. **HRMS** (EI+):  $m/z$  Calcd for  $\text{C}_{22}\text{H}_{24}\text{O}_4$ : ( $\text{M}^+$ ) 352.1675, found 352.1672.  $[\alpha]_{\text{D}}^{20} = (+) 91.6$  ( $c = 0.14$ , in  $\text{CHCl}_3$ ). **Chiral separation** (94% ee): The enantioselectivity was determined by SFC using Chiralpak IA (Back pressure = 15 MPa, Flow ( $\text{CO}_2$ ) = 2.4 mL/min, Flow (isopropanol) = 0.6 mL/min, 25 °C,  $\lambda = 250$  nm). Retention time:  $t_{\text{R}} = 2.4$  min (minor enantiomer) and 3.6 min (major enantiomer).

**(2a<sup>1</sup>S,4S,5R,5aR,8aS)-3,4,8a-Trimethyl-5-(4-methylbenzoyl)-2,2a<sup>1</sup>,4,5,5a,8a-hexahydro-6H-naptho[1,8-*bc*]furan-6-one (3ag)**: Following the general procedure, (*R,R*)-**L\*6**· $\text{HBF}_4$  (16.2 mg, 0.02

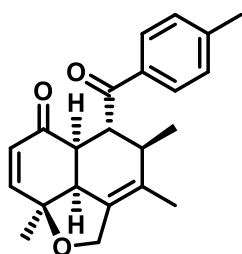

mmol),  $\text{NaO}^t\text{Bu}$  (1.9 mg, 0.02 mmol),  $\text{Ni}(\text{cod})_2$  (5.5 mg, 0.02 mmol), 4-(but-2-yn-1-yloxy)-4-methylcyclohexa-2,5-dien-1-one (**1a**, 42.2 mg, 0.24 mmol) and (*E*)-1-(*p*-tolyl)but-2-en-1-one (**2g**, 32.0 mg, 0.2 mmol) were used. Purification by silica gel flash column chromatography (5% EtOAc in hexane) gave **3ag** (45.0 mg, 0.134 mmol, 67% yield) as thick oil.  $R_f = 0.3$  (20% EtOAc in hexane).  $^1\text{H NMR}$  (400 MHz,  $\text{CDCl}_3$ ):  $\delta$  7.94 (2H, d,  $J = 7.6$  Hz, benzoyl-*ortho*-Ar-*H*), 7.28 (2H, d,  $J = 7.6$  Hz, benzoyl-*meta*-Ar-*H*), 6.51 (1H, d,  $J = 10.0$  Hz,  $\text{CH}=\text{CHCO}$ ), 5.90 (1H, d,  $J = 10.4$  Hz,  $\text{CH}=\text{CHCO}$ ), 4.56 (1H, s,  $\text{CHCOPh}$ ), 4.48 (1H, dd,  $J = 12.6$  Hz,  $\text{OCH}_2\text{C}$ ), 4.21 (1H, d,  $J = 12.6$  Hz,  $\text{OCH}_2\text{C}$ ), 2.92 (1H, d,  $J = 5.6$  Hz,  $\text{CH}=\text{CHCOCHCH}$ ), 2.72 (1H, br s,  $\text{CCHC}=\text{CH}$ ), 2.59 (1H, br s,  $\text{CCHCH}_3$ ), 2.42 (3H, s, Ar- $\text{CH}_3$ ), 1.57 (3H, br s,  $\text{CCH}_3$ ), 1.40 (3H, s,  $\text{C}=\text{CCH}_3$ ), 1.11 (3H, d,  $J = 7.0$  Hz,  $\text{CHCH}_3$ ).  $^{13}\text{C NMR}$  (100 MHz,  $\text{CDCl}_3$ ):  $\delta$  201.7, 196.5, 151.9, 144.0, 133.0, 131.2, 129.5, 128.7, 128.4, 128.0, 80.0, 68.6, 48.1, 43.9, 42.3, 33.5, 24.1, 21.6, 20.6, 17.2. **HRMS** (EI+):  $m/z$  Calcd for  $\text{C}_{22}\text{H}_{24}\text{O}_3$ : ( $\text{M}^+$ ) 336.1725, found 336.1720.  $[\alpha]_{\text{D}}^{20} = (+) 96.3$  ( $c = 0.13$ , in  $\text{CHCl}_3$ ). **Chiral separation** (95% ee): The enantioselectivity was determined by SFC using Chiralpak IA (Back pressure = 15 MPa, Flow ( $\text{CO}_2$ ) = 3.0 mL/min, Flow (isopropanol) = 0.3 mL/min, 25 °C,  $\lambda = 250$  nm). Retention time:  $t_{\text{R}} = 3.6$  min (minor enantiomer) and 5.4 min (major

enantiomer).

**(2a<sup>1</sup>S,4S,5R,5aR,8aS)-(4-Fluorobenzoyl)-3,4,8a-trimethyl-2,2a<sup>1</sup>,4,5,5a,8a-hexahydro-6H-naphtho[1,8-*bc*]furan-6-one (3ah):** Following the general procedure, (*R,R*)-**L\*6**·HBF<sub>4</sub> (16.4 mg, 0.02

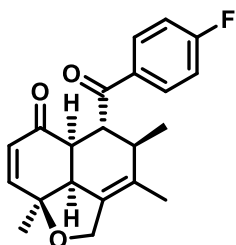

mmol), NaO<sup>t</sup>Bu (2.0 mg, 0.02 mmol), Ni(cod)<sub>2</sub> (5.5 mg, 0.02 mmol), 4-(but-2-yn-1-yloxy)-4-methylcyclohexa-2,5-dien-1-one (**1a**, 42.2 mg, 0.24 mmol) and (*E*)-1-(4-fluorophenyl)but-2-en-1-one (**2h**, 32.8 mg, 0.2 mmol) were used. Purification by silica gel flash column chromatography (5% EtOAc in hexane) gave **3ah** (46.0 mg, 0.135 mmol, 68% yield) as thick oil.

*R*<sub>f</sub> = 0.3 (20% EtOAc in hexane). <sup>1</sup>H NMR (400 MHz, CDCl<sub>3</sub>): δ 8.05–8.09

(2H, m, benzoyl-*ortho*-Ar-*H*), 7.12–7.18 (2H, m, benzoyl-*meta*-Ar-*H*), 6.53 (1H, dd *J* = 10.5, 1.5 Hz, CH=CHCO), 5.91 (1H, d, *J* = 10.5 Hz, CH=CHCO), 4.54 (1H, s, CHCOPh), 4.51 (1H, dd, *J* = 13.4 Hz, OCH<sub>2</sub>C), 4.21 (1H, d, *J* = 13.4 Hz, OCH<sub>2</sub>C), 2.89 (1H, d, *J* = 5.7 Hz, CH=CHCOCHCH), 2.71 (1H, br s, CCHC=CH), 2.59 (1H, d, *J* = 3.4 Hz, CCHCH<sub>3</sub>), 1.58 (3H, br s, CCH<sub>3</sub>), 1.42 (3H, s, C=CCH<sub>3</sub>), 1.11 (3H, d, *J* = 6.7 Hz, CHCH<sub>3</sub>). <sup>13</sup>C NMR (100 MHz, CDCl<sub>3</sub>): δ 200.4, 196.2, 165.8 (d, *J*<sub>CF</sub> = 255.6 Hz), 152.1, 132.0, 131.3, 128.3, 128.0, 116.1, 115.7 (d, *J*<sub>CF</sub> = 20.1 Hz), 80.0, 68.6, 48.2, 43.9, 42.3, 33.5, 24.1, 20.6, 17.2. HRMS (EI<sup>+</sup>): *m/z* Calcd for C<sub>21</sub>H<sub>21</sub>FO<sub>3</sub>: (M<sup>+</sup>) 340.1475, found 340.1474. [α]<sub>D</sub><sup>20</sup> = (+) 86.4 (*c* = 0.15, in CHCl<sub>3</sub>). **Chiral separation** (95% ee): The enantioselectivity was determined by SFC using Chiralpak IA (Back pressure = 15 MPa, Flow (CO<sub>2</sub>) = 3.0 mL/min, Flow (isopropanol) = 0.3 mL/min, 25 °C, λ = 250 nm). Retention time: *t*<sub>R</sub> = 2.7 min (minor enantiomer) and 3.3 min (major enantiomer).

**(2a<sup>1</sup>S,4S,5R,5aR,8aS)-(3-Fluorobenzoyl)-3,4,8a-trimethyl-2,2a<sup>1</sup>,4,5,5a,8a-hexahydro-6H-naphtho[1,8-*bc*]furan-6-one (3ai):** Following the general procedure, (*R,R*)-**L\*6**·HBF<sub>4</sub> (16.0 mg, 0.02

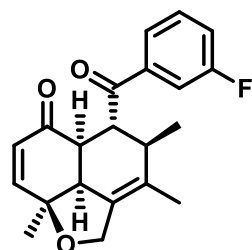

mmol), NaO<sup>t</sup>Bu (2.0 mg, 0.02 mmol), Ni(cod)<sub>2</sub> (5.5 mg, 0.02 mmol), 4-(but-2-yn-1-yloxy)-4-methylcyclohexa-2,5-dien-1-one (**1a**, 42.0 mg, 0.24 mmol) and (*E*)-1-(3-fluorophenyl)but-2-en-1-one (**2i**, 32.5 mg, 0.2 mmol) were used. Purification by silica gel flash column chromatography (5% EtOAc in hexane) gave **3ai** (47.0 mg, 0.14 mmol, 70% yield) as thick oil.

*R*<sub>f</sub> = 0.3 (20% EtOAc in hexane). <sup>1</sup>H NMR (400 MHz, CDCl<sub>3</sub>): δ 7.82 (1H,

d, *J* = 8.0 Hz, benzoyl-*ortho*-Ar-*H*), 7.70 (1H, d, *J* = 8.0 Hz, benzoyl-*ortho*-Ar-*H*), 7.47 (1H, dd, *J* = 8.0, 8.0 Hz, benzoyl-*meta*-Ar-*H*), 7.29 (1H, dd, *J* = 8.0, 8.0 Hz, benzoyl-*para*-Ar-*H*), 6.52 (1H, dd *J* = 10.0, 1.8 Hz, CH=CHCO), 5.91 (1H, d, *J* = 10.0 Hz, CH=CHCO), 4.52 (1H, s, CHCOPh), 4.50 (1H,

d,  $J = 12.7$  Hz,  $\text{OCH}_2\text{C}$ ), 4.21 (1H, d,  $J = 12.7$  Hz,  $\text{OCH}_2\text{C}$ ), 2.91 (1H, d,  $J = 5.7$  Hz,  $\text{CH}=\text{CHCOCHCH}$ ), 2.71 (1H, br s,  $\text{CCHC}=\text{CH}$ ), 2.58 (1H, d,  $J = 5.7$  Hz,  $\text{CCHCH}_3$ ), 1.57 (3H, br s,  $\text{CCH}_3$ ), 1.42 (3H, s,  $\text{C}=\text{CCH}_3$ ), 1.11 (3H, d,  $J = 7.2$  Hz,  $\text{CHCH}_3$ ).  $^{13}\text{C}$  NMR (100 MHz,  $\text{CDCl}_3$ ):  $\delta$  200.8, 196.1, 163.1 (d,  $J_{\text{CF}} = 248.6$  Hz), 152.0, 137.8 (d,  $J_{\text{CF}} = 6.7$  Hz), 131.3, 130.6 (d,  $J_{\text{CF}} = 8.7$  Hz), 128.2, 128.0, 124.2 (d,  $J_{\text{CF}} = 2.8$  Hz), 120.3 (d,  $J_{\text{CF}} = 22.2$  Hz), 115.3 (d,  $J_{\text{CF}} = 22.2$  Hz), 80.0, 68.6, 48.5, 43.9, 42.1, 33.4, 24.1, 20.6, 17.2. **HRMS** (EI+):  $m/z$  Calcd for  $\text{C}_{21}\text{H}_{21}\text{FO}_3$ : ( $\text{M}^+$ ) 340.1475, found 340.1478.  $[\alpha]_{\text{D}}^{20} = (+) 84.4$  ( $c = 0.14$ , in  $\text{CHCl}_3$ ). **Chiral separation** (97% ee): The enantioselectivity was determined by SFC using Chiralpak IA (Back pressure = 15 MPa, Flow ( $\text{CO}_2$ ) = 4.5 mL/min, Flow (isopropanol) = 0.2 mL/min, 25 °C,  $\lambda = 250$  nm). Retention time:  $t_{\text{R}} = 3.2$  min (minor enantiomer) and 3.6 min (major enantiomer).

**(2a<sup>1</sup>S,4S,5R,5aR,8aS)-5-Benzoyl-8a-ethyl-3-methyl-4-phenyl-2,2a<sup>1</sup>,4,5,5a,8a-hexahydro-6H-naphtho[1,8-bc]furan-6-one (3bb)**: Following the general procedure, (*R,R*)-**L\*6**· $\text{HBF}_4$  (16.4 mg, 0.02

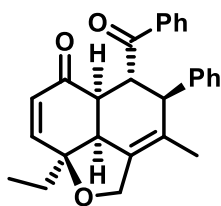

mmol), NaO<sup>t</sup>Bu (2.0 mg, 0.02 mmol), Ni(cod)<sub>2</sub> (5.5 mg, 0.02 mmol), 4-(but-2-yn-1-yloxy)-4-ethylcyclohexa-2,5-dien-1-one (**1b**, 45.2 mg, 0.24 mmol) and chalcone (**2b**, 41.6 mg, 0.2 mmol) were used. Purification by silica gel flash column chromatography (5% EtOAc in hexane) gave **3bb** (58.0 mg, 0.146 mmol, 73% yield) as thick oil.  $R_{\text{f}} = 0.3$  (20% EtOAc in hexane).  $^1\text{H}$  NMR (400 MHz,  $\text{CDCl}_3$ )  $\delta$  7.96 (2H, d,  $J = 7.6$  Hz, benzoyl-ortho-Ar-H), 7.55 (1H, dd,  $J = 7.6, 7.6$  Hz, benzoyl-para-Ar-H), 7.43 (2H, dd,  $J = 7.6, 7.6$  Hz, benzoyl-meta-Ar-H), 7.20–7.28 (3H, m, Ar-H), 6.98 (2H, d,  $J = 7.6$  Hz, Ar-H), 6.59 (1H, dd,  $J = 10.2, 2.0$  Hz,  $\text{CH}=\text{CHCO}$ ), 6.05 (1H, d,  $J = 10.2$  Hz,  $\text{CH}=\text{CHCO}$ ), 4.87 (1H, s,  $\text{CHCOPh}$ ), 4.57 (1H, d,  $J = 12.6$  Hz,  $\text{OCH}_2\text{C}$ ), 4.34 (1H, d,  $J = 12.6$  Hz,  $\text{OCH}_2\text{C}$ ), 3.85 (1H, s,  $\text{CCH-Ph}$ ), 2.97 (1H, d,  $J = 5.2$  Hz,  $\text{CH}=\text{CHCOCHCH}$ ), 2.83 (1H, br s,  $\text{CCHC}=\text{CH}$ ), 1.74–1.84 (2H, m,  $\text{CH}_2\text{CH}_3$ ), 1.41 (3H, s,  $\text{C}=\text{CCH}_3$ ), 0.92 (3H, t,  $J = 7.7$  Hz,  $\text{CH}_2\text{CH}_3$ ).  $^{13}\text{C}\{^1\text{H}\}$  NMR (100 MHz,  $\text{CDCl}_3$ )  $\delta$  201.5, 195.6, 150.4, 143.4, 135.3, 134.1, 133.3, 129.2, 129.1, 128.8, 128.7, 128.3, 126.6, 126.1, 82.7, 68.4, 49.6, 44.9, 43.4, 42.0, 31.1, 18.1, 8.0. **HRMS** (EI):  $m/z$  Calcd for  $\text{C}_{27}\text{H}_{26}\text{O}_3$ : ( $\text{M}^+$ ) 384.1725, found 384.1726.  $[\alpha]_{\text{D}}^{23} = (+) 170.8$  ( $c = 0.17$ , in  $\text{CHCl}_3$ ). **Chiral separation** (99% ee): The enantioselectivity was determined by SFC using Chiralpak IA (Back pressure = 15 MPa, Flow ( $\text{CO}_2$ ) = 3.0 mL/min, Flow (isopropanol) = 0.3 mL/min, 25 °C,  $\lambda = 250$  nm). Retention time:  $t_{\text{R}} = 3.8$  min (minor enantiomer) and 5.6 min (major enantiomer).

**(2a<sup>1</sup>S,4S,5R,5aR,8aS)-5-Benzoyl-8a-ethyl-3-methyl-4-propyl-2,2a<sup>1</sup>,4,5,5a,8a-hexahydro-6H-nap**

**htho[1,8-*bc*]furan-6-one (3bj):** Following the general procedure, (*R,R*)-**L\*6**·HBF<sub>4</sub> (16.0 mg, 0.02

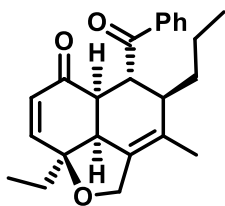

mmol), NaO<sup>t</sup>Bu (2.0 mg, 0.02 mmol), Ni(cod)<sub>2</sub> (5.5 mg, 0.02 mmol), 4-(but-2-yn-1-yloxy)-4-ethylcyclohexa-2,5-dien-1-one (**1b**, 45.6 mg, 0.24 mmol) and (*E*)-1-phenylhex-2-en-1-one (**2j**, 34.2 mg, 0.2 mmol) were used. Purification by silica gel flash column chromatography (5% EtOAc in hexane) gave **3bj** (48.0 mg, 0.132 mmol, 65% yield) as thick oil. R<sub>f</sub> = 0.4 (20% EtOAc

in hexane). <sup>1</sup>H NMR (400 MHz, CDCl<sub>3</sub>): δ 8.03 (2H, d, *J* = 7.6 Hz, benzoyl-*ortho*-Ar-*H*), 7.57 (1H, dd, *J* = 7.6, 7.6 Hz, benzoyl-*para*-Ar-*H*), 7.50 (2H, dd, *J* = 7.6, 7.6 Hz, benzoyl-*meta*-Ar-*H*), 6.51 (1H, dd, *J* = 10.1, 2.0 Hz, CH=CHCO), 5.96 (1H, d, *J* = 10.1 Hz, CH=CHCO), 4.74 (1H, br s, CHCOPh), 4.49 (1H, d, *J* = 12.6 Hz, OCH<sub>2</sub>C), 4.22 (1H, d, *J* = 12.6 Hz, OCH<sub>2</sub>C), 2.87 (1H, dd, *J* = 5.2, 1.7 Hz, CH=CHCOCHCH), 2.64 (1H, br s, CCH-Ph), 2.51 (1H, d, *J* = 11.8 Hz, CH=CHCOCHCH), 1.57–1.76 (7H, m, (CH<sub>2</sub>)<sub>2</sub>CH<sub>3</sub>, C=CCH<sub>3</sub>), 1.23–1.31 (1H, m, CH<sub>2</sub>CH<sub>3</sub>), 1.07–1.15 (1H, m, CH<sub>2</sub>CH<sub>3</sub>), 0.89 (3H, t, *J* = 7.6 Hz, CH<sub>2</sub>CH<sub>3</sub>), 0.84 (3H, t, *J* = 7.6 Hz, CH<sub>2</sub>CH<sub>3</sub>). <sup>13</sup>C{<sup>1</sup>H} NMR (100 MHz, CDCl<sub>3</sub>) δ 202.3, 196.3, 151.2, 135.4, 133.2, 131.5, 128.9, 128.8, 128.5, 127.9, 82.5, 68.6, 44.4, 42.9, 41.5, 38.2, 34.6, 31.0, 21.3, 17.6, 14.1, 8.0. HRMS (EI): *m/z* Calcd for C<sub>24</sub>H<sub>28</sub>O<sub>3</sub>: (M<sup>+</sup>) 364.2038, found 364.2039. [α]<sub>D</sub><sup>20</sup> = (+) 52.7 (*c* = 0.14, in CHCl<sub>3</sub>). **Chiral separation** (96% ee): The enantioselectivity was determined by SFC using Chiralpak IA (Back pressure = 15 MPa, Flow (CO<sub>2</sub>) = 3.0 mL/min, Flow (isopropanol) = 0.3 mL/min, 25 °C, λ = 250 nm). Retention time: *t*<sub>R</sub> = 2.4 min (minor enantiomer) and 4.2 min (major enantiomer).

**(2a<sup>1</sup>*S*,4*S*,5*R*,5a*R*,8a*S*)-5-Benzoyl-8a-(2-methoxyethyl)-4-(4-methoxyphenyl)-3-methyl-2,2a<sup>1</sup>,4,5,5a,8a-hexahydro-6*H*-naphtho[1,8-*bc*]furan-6-one (3ca):** Following the general procedure,

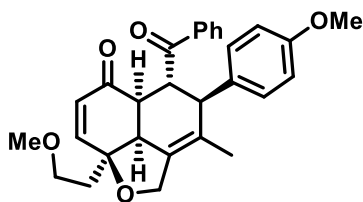

(*R,R*)-**L\*6**·HBF<sub>4</sub> (16.0 mg, 0.02 mmol), NaO<sup>t</sup>Bu (2.0 mg, 0.02 mmol), Ni(cod)<sub>2</sub> (5.5 mg, 0.02 mmol), 4-(but-2-yn-1-yloxy)-4-(2-methoxyethyl)cyclohexa-2,5-dien-1-one (**1c**, 48.4 mg, 0.24 mmol) and (*E*)-3-(4-methoxyphenyl)-1-phenylprop-2-en-1-one (**2a**, 47.0 mg,

0.197 mmol) were used. Purification by silica gel flash column chromatography (20% EtOAc in hexane) gave **3ca** (55.0 mg, 0.12 mmol, 60% yield) as a white amorphous solid. R<sub>f</sub> = 0.2 (30% EtOAc in hexane). <sup>1</sup>H NMR (400 MHz, CDCl<sub>3</sub>): δ 8.00 (2H, d, *J* = 7.9 Hz, benzoyl-*ortho*-Ar-*H*), 7.52 (1H, dd, *J* = 7.9, 7.9 Hz, benzoyl-*para*-Ar-*H*), 7.44 (2H, dd, *J* = 7.9, 7.9 Hz, benzoyl-*meta*-Ar-*H*), 6.90 (2H, d, *J* = 8.8 Hz, anisyl-*ortho*-Ar-*H*), 6.79 (2H, d, *J* = 8.8 Hz, anisyl-*meta*-Ar-*H*), 6.52 (1H, dd, *J* = 10.3, 2.0 Hz, CH=CHCO), 6.04 (1H, d, *J* = 10.3 Hz,

CH=CHCO), 4.85 (1H, dd,  $J = 2.2, 1.7$  Hz,  $CHCOPh$ ), 4.54 (1H, d,  $J = 13.3$  Hz,  $OCH_2C$ ), 4.33 (1H, d,  $J = 13.3$  Hz,  $OCH_2C$ ), 3.88 (1H, br s,  $CH=CHCOCHCH$ ), 3.78 (3H, s,  $OCH_3$ ), 3.33–3.40 (2H, m,  $CH_2OCH_3$ ), 3.19 (1H, dd,  $J = 5.6, 1.3$  Hz,  $CCH-Ph$ ), 2.86 (3H, s,  $CH_2OCH_3$ ), 2.80 (1H, br s,  $C=CCH$ ), 2.03–2.10 (1H, m,  $CH_2CH_2OCH_3$ ), 1.91–1.97 (1H, m,  $CH_2CH_2OCH_3$ ), 1.41 (3H, br s,  $C=CCH_3$ ).  $^{13}C\{^1H\}$  NMR (100 MHz,  $CDCl_3$ )  $\delta$  201.3, 195.9, 158.1, 150.3, 135.8, 135.2, 133.8, 133.2, 130.1, 129.3, 128.8, 128.7, 126.5, 113.6, 82.1, 68.2, 67.8, 58.0, 55.1, 49.9, 43.8, 43.1, 42.5, 38.1, 18.1. **HRMS** (EI):  $m/z$  Calcd for  $C_{29}H_{30}O_5$ : ( $M^+$ ) 458.2093, found 458.2088.  $[\alpha]_D^{23} = (+) 215.9$  ( $c = 0.10$ , in  $CHCl_3$ ). **Chiral separation** (98% ee): The enantioselectivity was determined by SFC using Chiralpak IA (Back pressure = 15 MPa, Flow ( $CO_2$ ) = 2.4 mL/min, Flow (isopropanol) = 0.6 mL/min, 25 °C,  $\lambda = 250$  nm). Retention time:  $t_R = 3.1$  min (minor enantiomer) and 4.5 min (major enantiomer).

**(2a<sup>1S</sup>,4S,5R,5aR,8aS)-5-Benzoyl-4-(4-chlorophenyl)-8a-(2-methoxyethyl)-3-methyl-2,2a<sup>1</sup>,4,5,5a,8a-hexahydro-6H-naphtho[1,8-bc]furan-6-one (3ck):** Following the general procedure,

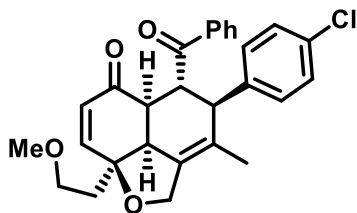

(*R,R*)-**L\*6**· $HF_4$  (16.0 mg, 0.02 mmol), NaO<sup>t</sup>Bu (2.0 mg, 0.02 mmol), Ni(cod)<sub>2</sub> (5.5 mg, 0.02 mmol), 4-(but-2-yn-1-yloxy)-4-(2-methoxyethyl)cyclohexa-2,5-dien-1-one (**1c**, 48.0 mg, 0.24 mmol) and (*E*)-3-(4-chlorophenyl)-1-phenylprop-2-en-1-one (**2k**, 49.0 mg,

0.2 mmol) were used. Purification by silica gel flash column chromatography (15% EtOAc in hexane) gave **3ck** (63.0 mg, 0.136 mmol, 68% yield) as a white amorphous solid.  $R_f = 0.2$  (20% EtOAc in hexane).  $^1H$  NMR (400 MHz,  $CDCl_3$ ):  $\delta$  7.97 (2H, d,  $J = 7.6$  Hz, benzoyl-*ortho*-Ar-*H*), 7.54 (1H, dd,  $J = 7.6, 7.6$  Hz, benzoyl-*para*-Ar-*H*), 7.43 (2H, dd,  $J = 7.6, 7.6$  Hz, benzoyl-*meta*-Ar-*H*), 7.22 (2H, d,  $J = 8.4$  Hz, anisyl-*ortho*-Ar-*H*), 6.92 (2H, d,  $J = 8.4$  Hz, anisyl-*meta*-Ar-*H*), 6.52 (1H, dd,  $J = 10.2, 1.8$  Hz,  $CH=CHCO$ ), 6.03 (1H, d,  $J = 10.2$  Hz,  $CH=CHCO$ ), 4.81 (1H, dd,  $J = 2.0, 1.8$  Hz,  $CHCOPh$ ), 4.55 (1H, d,  $J = 13.1$  Hz,  $OCH_2C$ ), 4.32 (1H, d,  $J = 13.1$  Hz,  $OCH_2C$ ), 3.93 (1H, br s,  $CH=CHCOCHCH$ ), 3.31–3.93 (2H, m,  $CH_2OCH_3$ ), 3.22 (1H, dd,  $J = 5.8, 1.5$  Hz,  $CCH-Ph$ ), 2.81 (3H, s,  $CH_2OCH_3$ ), 2.78 (1H, br s,  $C=CCH$ ), 2.02–2.09 (1H, m,  $CH_2CH_2OCH_3$ ), 1.89–1.96 (1H, m,  $CH_2CH_2OCH_3$ ), 1.40 (3H, br s,  $C=CCH_3$ ).  $^{13}C\{^1H\}$  NMR (100 MHz,  $CDCl_3$ )  $\delta$  200.8, 195.8, 150.4, 142.3, 135.0, 134.6, 133.3, 132.3, 130.5, 129.2, 128.8, 128.7, 128.5, 125.6, 82.2, 68.2, 67.8, 58.0, 49.6, 43.8, 43.2, 42.5, 38.0, 18.1. **HRMS** (EI):  $m/z$  Calcd for  $C_{28}H_{27}ClO_4$ : ( $M^+$ ) 462.1798, found 462.1594.  $[\alpha]_D^{20} = (+) 132.8$  ( $c = 0.27$ , in  $CHCl_3$ ). **Chiral separation** (98% ee): The enantioselectivity was determined by SFC using Chiralpak IA (Back



pressure = 15 MPa, Flow (CO<sub>2</sub>) = 2.4 mL/min, Flow (isopropanol) = 0.6 mL/min, 40 °C, λ = 250 nm). Retention time: *t*<sub>R</sub> = 3.0 min (minor enantiomer) and 3.8 min (major enantiomer).

**(2a<sup>1</sup>S,4S,5R,5aR,8aS)-5-Benzoyl-4,8a-dimethyl-3-phenyl-2,2a<sup>1</sup>,4,5,5a,8a-hexahydro-6H-naphtho[1,8-*bc*]furan-6-one (3de):** Following the general procedure, (*R,R*)-**L\*6**·HBF<sub>4</sub> (16.0 mg, 0.02

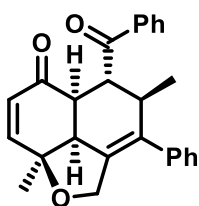

mmol), NaO<sup>t</sup>Bu (2.0 mg, 0.02 mmol), Ni(cod)<sub>2</sub> (5.5 mg, 0.02 mmol), 4-methyl-4-((3-phenylprop-2-yn-1-yl)oxy)cyclohexa-2,5-dien-1-one (**1d**, 57.0 mg, 0.24 mmol) and (*E*)-1-phenylbut-2-en-1-one (**2e**, 29.8 mg, 0.02 mmol), were used. Purification by silica gel flash column chromatography gave **3de** (54.0 mg, mmol, 0.14 mmol, 70% yield) as thick oil. *R*<sub>f</sub> = 0.3 (20% EtOAc in hexane).

<sup>1</sup>H NMR (400 MHz, CDCl<sub>3</sub>): δ 8.08 (2H, d, *J* = 7.8 Hz, benzoyl-*ortho*-Ar-*H*), 7.61 (1H, dd, *J* = 7.8, 7.8 Hz, benzoyl-*para*-Ar-*H*), 7.52 (2H, dd, *J* = 7.8, 7.8 Hz, benzoyl-*meta*-Ar-*H*), 7.30 (2H, dd, *J* = 7.6, 7.6 Hz, Ph-*ortho*-Ar-*H*), 7.22 (1H, dd, *J* = 7.6, 7.6 Hz, Ph-*para*-Ar-*H*), 7.05 (2H, d, *J* = 7.6 Hz, Ph-*meta*-Ar-*H*), 6.59 (1H, dd, *J* = 10.1, 2.0 Hz, CH=CHCO), 6.03 (1H, d, *J* = 10.2 Hz, CH=CHCO), 4.73 (1H, br s, CHCOPh), 4.26 (1H, d, *J* = 13.5 Hz, OCH<sub>2</sub>C), 4.19 (1H, d, *J* = 13.5 Hz, OCH<sub>2</sub>C), 2.93 (2H, dd, *J* = 1.6, 5.6 Hz, CH=CHCOCHCH, CHCH<sub>3</sub>), 2.85 (1H, br s, CCHC=C), 1.46 (3H, s, CCH<sub>3</sub>), 0.92 (3H, d, *J* = 7.6 Hz, CHCH<sub>3</sub>). <sup>13</sup>C{<sup>1</sup>H} NMR (100 MHz, CDCl<sub>3</sub>) δ 202.0, 196.0, 151.9, 140.1, 135.5, 134.8, 134.2, 133.3, 128.9, 128.5, 128.33, 128.25, 127.6, 126.8, 80.0, 68.5, 47.8, 44.1, 42.1, 33.2, 23.9, 21.3. HRMS (EI<sup>+</sup>): *m/z* Calcd for C<sub>26</sub>H<sub>24</sub>O<sub>3</sub>: (M<sup>+</sup>) 384.1725, found 384.1727. [α]<sub>D</sub><sup>23</sup> = (+) 211.4 (*c* = 0.11, in CHCl<sub>3</sub>). **Chiral separation** (99% ee): The enantioselectivity was determined by SFC using Chiralpak IA (Back pressure = 15 MPa, Flow (CO<sub>2</sub>) = 3.0 mL/min, Flow (isopropanol) = 0.3 mL/min, 25 °C, λ = 250 nm). Retention time: *t*<sub>R</sub> = 3.4 min (minor enantiomer) and 5.7 min (major enantiomer).

**(2a<sup>1</sup>S,4S,5R,5aR,8aS)-5-Benzoyl-4-(4-fluorophenyl)-3-(4-methoxyphenyl)-8a-methyl-2,2a<sup>1</sup>,4,5,5a,8a-hexahydro-6H-naphtho[1,8-*bc*]furan-6-one (3ec):** Following the general procedure,

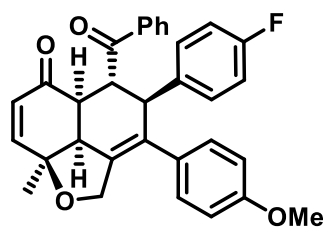

(*R,R*)-**L\*6**·HBF<sub>4</sub> (16.0 mg, 0.02 mmol), NaO<sup>t</sup>Bu (2.0 mg, 0.02 mmol), Ni(cod)<sub>2</sub> (5.5 mg, 0.02 mmol), 4-((3-(4-methoxyphenyl)prop-2-yn-1-yl)oxy)-4-methylcyclohexa-2,5-dien-1-one (**1e**, 64.3 mg, 0.24 mmol) and (*E*)-3-(4-fluorophenyl)-1-phenylprop-2-en-1-one (**2c**, 45.0 mg, 0.2

mmol) were used. Purification by silica gel flash column chromatography (20% EtOAc in hexane) gave **3ec** (70.0 mg, 0.14 mmol, 71% yield) as a white amorphous solid. *R*<sub>f</sub> = 0.2 (20% EtOAc in

hexane). **<sup>1</sup>H NMR** (400 MHz, CDCl<sub>3</sub>) δ 7.99 (2H, d, *J* = 7.6 Hz, benzoyl-*ortho*-Ar-*H*), 7.56 (1H, dd, *J* = 7.6, 7.6 Hz, benzoyl-*para*-Ar-*H*), 7.44 (2H, dd, *J* = 7.6, 8.6 Hz, benzoyl-*ortho*-Ar-*H*), 6.88 (2H, dd, *J* = 8.6, 8.6 Hz, Ar-*H*), 6.83 (2H, d, *J* = 8.6 Hz, Ar-*H*), 6.76 (2H, dd, *J* = 8.6, 8.6 Hz, Ar-*H*), 6.63 (1H, dd, *J* = 1.8, 10.1 Hz, CH=CHCO), 6.62 (2H, d, *J* = 8.6 Hz, Ar-*H*), 6.09 (1H, d, *J* = 10.1 Hz, CH=CHCO), 4.99 (1H, dd, *J* = 1.4, 3.5 Hz, CHCOPh), 4.58 (1H, d, *J* = 13.2 Hz, OCH<sub>2</sub>C), 4.50 (1H, quintet, *J* = 3.3 Hz, CHAr), 4.34 (1H, dq, *J* = 1.5, 13.2 Hz, OCH<sub>2</sub>C), 3.69 (3H, s, OCH<sub>3</sub>), 3.04 (1H, dd, *J* = 1.4, 5.7 Hz, CH=CHCOCHCH), 2.91 (1H, br s, CCHC=CH), 1.50 (3H, s, CCH<sub>3</sub>). **<sup>13</sup>C{<sup>1</sup>H} NMR** (100 MHz, CDCl<sub>3</sub>) δ 201.2, 195.4, 161.2 (d, *J*<sub>CF</sub> = 250.4 Hz), 158.0, 151.4, 139.1 (d, *J*<sub>CF</sub> = 3.1 Hz), 137.2, 135.3, 133.5, 131.7 (d, *J*<sub>CF</sub> = 15.7 Hz), 130.9 (d, *J*<sub>CF</sub> = 7.4 Hz), 129.0, 128.9, 128.8, 128.6, 115.0, 114.7, 113.3, 80.1, 68.8, 55.0, 50.2, 45.3, 43.9, 43.8, 23.8. **HRMS** (EI+): *m/z* Calcd for C<sub>32</sub>H<sub>27</sub>FO<sub>4</sub>: (M<sup>+</sup>) 494.1893, found 494.1895. [α]<sub>D</sub><sup>20</sup> = (+) 217.2 (*c* = 0.30, in CHCl<sub>3</sub>). **Chiral separation** (98% ee): The enantioselectivity was determined by SFC using Chiralpak IA (Back pressure = 15 MPa, Flow (CO<sub>2</sub>) = 2.4 mL/min, Flow (isopropanol) = 0.6 mL/min, 40 °C, λ = 250 nm). Retention time: *t*<sub>R</sub> = 3.0 min (minor enantiomer) and 4.3 min (major enantiomer).

**(2a<sup>1</sup>S,4S,5R,5aR,8aS)-5-Benzoyl-4-(4-chlorophenyl)-3-(4-methoxyphenyl)-8a-methyl-2,2a<sup>1</sup>,4,5,5a,8a-hexahydro-6H-naphtho[1,8-*bc*]furan-6-one (3ek):** Following the general procedure,

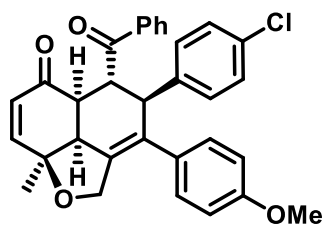

(*R,R*)-**L\*6**·HBF<sub>4</sub> (32.2 mg, 0.04 mmol), NaO<sup>t</sup>Bu (3.9 mg, 0.04 mmol), Ni(cod)<sub>2</sub> (10.9 mg, 0.04 mmol), 4-((3-(4-methoxyphenyl)prop-2-yn-1-yl)oxy)-4-methylcyclohexa-2,5-dien-1-one (**1e**, 128.0 mg, 0.48 mmol) and (*E*)-3-(4-chlorophenyl)-1-phenylprop-2-en-1-one (**2k**, 98.0 mg, 0.4

mmol) were used. Purification by silica gel flash column chromatography (20% EtOAc in hexane) gave **3ek** (138.0 mg, 0.27 mmol, 68% yield) as a white amorphous solid. *R*<sub>f</sub> = 0.2 (20% EtOAc in hexane). **<sup>1</sup>H NMR** (400 MHz, CDCl<sub>3</sub>) δ 7.99 (2H, d, *J* = 8.0 Hz, benzoyl-*ortho*-Ar-*H*), 7.56 (1H, dd, *J* = 8.0, 8.0 Hz, benzoyl-*para*-Ar-*H*), 7.44 (2H, dd, *J* = 8.0, 8.0 Hz, Ar-*H*), 7.04 (2H, d, *J* = 8.3 Hz, Ar-*H*), 6.86 (2H, d, *J* = 8.3 Hz, Ar-*H*), 6.84 (2H, d, *J* = 8.3 Hz, Ar-*H*), 6.63 (1H, d, *J* = 10.3 Hz, CH=CHCO), 6.62 (2H, d, *J* = 8.3 Hz, Ar-*H*), 6.10 (1H, d, *J* = 10.3 Hz, CH=CHCO), 4.97 (1H, dd, *J* = 1.1, 3.3 Hz, CHCOPh), 4.48 (1H, dt, *J* = 2.6, 14.0 Hz, OCH<sub>2</sub>C), 4.42 (1H, quintet, *J* = 3.1 Hz, CHAr), 4.33 (1H, d, *J* = 14.0 Hz, OCH<sub>2</sub>C), 3.69 (3H, s, OCH<sub>3</sub>), 3.04 (1H, d, *J* = 5.9 Hz, CH=CHCOCHCH), 2.88 (1H, br s, CCHC=CH), 1.49 (3H, s, CCH<sub>3</sub>). **<sup>13</sup>C{<sup>1</sup>H} NMR** (100 MHz, CDCl<sub>3</sub>) δ 201.0, 195.2, 158.0, 151.4, 142.0, 137.3, 135.1, 133.5, 131.8, 131.5, 131.4, 130.7, 129.0, 128.9, 128.8, 128.6, 128.2, 113.3, 80.0, 68.7, 55.0, 50.0, 45.2, 43.9, 43.7, 23.7. **HRMS** (EI+): *m/z*

Calcd for C<sub>32</sub>H<sub>27</sub>ClO<sub>4</sub>: (M<sup>+</sup>) 510.1598, found 510.1591. [ $\alpha$ ]<sub>D</sub><sup>23</sup> = (+) 201.8 (*c* = 0.46, in CHCl<sub>3</sub>).

**Chiral separation** (99% ee): The enantioselectivity was determined by SFC using Chiralpak IA (Back pressure = 15 MPa, Flow (CO<sub>2</sub>) = 2.4 mL/min, Flow (isopropanol) = 0.6 mL/min, 40 °C,  $\lambda$  = 250 nm). Retention time: *t*<sub>R</sub> = 3.9 min (minor enantiomer) and 5.8 min (major enantiomer).

**Ethyl 4-((2a<sup>1</sup>S,4S,5R,5aR,8aS)-5-benzoyl-4-(4-fluorophenyl)-8a-methyl-6-oxo-2a<sup>1</sup>,4,5,5a,6,8a-hexahydro-2H-naphtho[1,8-*bc*]furan-3-yl)benzoate (3fc):** Following the general procedure,

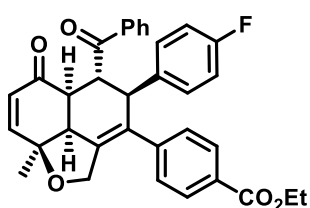

(*R,R*)-**L\*6**·HBF<sub>4</sub> (8.2 mg, 0.01 mmol), NaO<sup>t</sup>Bu (0.92 mg, 0.01 mmol), Ni(cod)<sub>2</sub> (2.7 mg, 0.01 mmol), ethyl 4-(3-((1-methyl-4-oxocyclohexa-2,5-dien-1-yl)oxy) prop-1-yn-1-yl)-benzoate (**1f**, 37.0 mg, 0.12 mmol) and (*E*)-3-(4-fluorophenyl)-1-phenylprop-2-en-1-one (**2c**, 22.6 mg, 0.1

mmol) were used. Purification by silica gel flash column chromatography (15% EtOAc in hexane) gave **3fc** (32.0 mg, 0.06 mmol, 60% yield) as thick oil. *R*<sub>f</sub> = 0.3 (20% EtOAc in hexane). <sup>1</sup>H NMR (400 MHz, CDCl<sub>3</sub>)  $\delta$  7.99 (2H, d, *J* = 8.5 Hz, benzoyl-*ortho*-Ar-*H*), 7.77 (2H, d, *J* = 8.5 Hz, benzoyl-*meta*-Ar-*H*), 7.57 (1H, dd, *J* = 8.5, 8.5 Hz, benzoyl-*para*-Ar-*H*), 7.45 (2H, dd, *J* = 7.8, 7.8 Hz, Ar-*H*), 6.99 (2H, d, *J* = 8.3 Hz, Ar-*H*), 6.88 (2H, d, *J* = 8.7 Hz, Ar-*H*), 6.74 (2H, dd, *J* = 8.7, 8.7 Hz, Ar-*H*), 6.64 (1H, dd, *J* = 1.9, 10.2 Hz, CH=CHCO), 6.14 (1H, d, *J* = 10.2 Hz, CH=CHCO), 5.02 (1H, dd, *J* = 1.4, 3.5 Hz, CHCOPh), 4.25–4.49 (2H, m, OCH<sub>2</sub>C), 4.25–4.44 (3H, m, CHAr, OCH<sub>2</sub>CH<sub>3</sub>), 3.06 (1H, dd, *J* = 1.2, 5.9 Hz, CH=CHCOCHCH), 2.90 (1H, br s, CCHC=3CH), 1.51 (3H, s, CCH<sub>3</sub>), 1.25 (3H, t, *J* = 7.3 Hz, CH<sub>2</sub>CH<sub>3</sub>). <sup>13</sup>C{<sup>1</sup>H} NMR (100 MHz, CDCl<sub>3</sub>)  $\delta$  201.0, 195.1, 166.2, 161.3 (d, *J*<sub>CF</sub> = 237.6 Hz), 151.2, 144.1, 138.9, 138.7 (d, *J*<sub>CF</sub> = 3.5 Hz), 135.1, 133.6, 130.8 (d, *J*<sub>CF</sub> = 8.5 Hz), 129.2, 128.9, 128.9, 128.8, 128.7, 127.9, 115.2, 114.9, 80.2, 68.5, 60.9, 49.8, 45.4, 43.9, 43.5, 23.7, 14.3. **HRMS** (EI<sup>+</sup>): *m/z* Calcd for C<sub>34</sub>H<sub>29</sub>FO<sub>5</sub>: (M<sup>+</sup>) 536.1999, found 536.1992. [ $\alpha$ ]<sub>D</sub><sup>20</sup> = (+) 158.4 (*c* = 0.09, in CHCl<sub>3</sub>). **Chiral separation** (98% ee): The enantioselectivity was determined by SFC using Chiralpak IA (Back pressure = 15 MPa, Flow (CO<sub>2</sub>) = 2.4 mL/min, Flow (isopropanol) = 0.6 mL/min, 40 °C,  $\lambda$  = 250 nm). Retention time: *t*<sub>R</sub> = 3.0 min (minor enantiomer) and 4.6 min (major enantiomer).

**(2a<sup>1</sup>S,4S,5R,5aR,8aS)-5-Benzoyl-4,8a-dimethyl-3-(4-(trifluoromethyl)phenyl)-2,2a<sup>1</sup>,4,5,5a,8a-hexahydro-6H-naphtho[1,8-*bc*]furan-6-one (3ge):** Following the general procedure, (*R,R*)-**L\*6**·HBF<sub>4</sub> (16.0 mg, 0.02 mmol), NaO<sup>t</sup>Bu (2.0 mg, 0.02 mmol), Ni(cod)<sub>2</sub> (5.5 mg, 0.02 mmol), 4-methyl-4-((3-(4-(trifluoromethyl)phenyl)prop-2-yn-1-yl)oxy)cyclohexa-2,5-dien-1-one (**1g**, 61.5

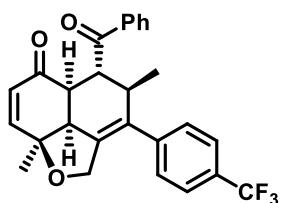

mg, 0.24 mmol) and (*E*)-1-phenylbut-2-en-1-one (**2e**, 29.2 mg, 0.2 mmol) were used. Purification by silica gel flash column chromatography (10% EtOAc in hexane) gave **3ge** (64.2 mg, 0.14 mmol, 71% yield) as a white crystalline solid.  $R_f = 0.3$  (20% EtOAc in hexane).  $^1\text{H NMR}$  (400 MHz,  $\text{CDCl}_3$ )  $\delta$  8.08 (2H, d,  $J = 7.4$  Hz, benzoyl-*ortho*-Ar-*H*), 7.62 (1H, dd,  $J = 7.4, 7.4$  Hz, benzoyl-*para*-Ar-*H*), 7.51–7.57 (4H, m, benzoyl and  $\text{CF}_3$ -*meta*-Ar-*H*), 7.19 (2H, d,  $J = 7.9$  Hz, Ar-*H*), 6.59 (1H, dd,  $J = 1.8, 10.2$  Hz,  $\text{CH}=\text{CHCO}$ ), 6.03 (1H, d,  $J = 10.2$  Hz,  $\text{CH}=\text{CHCO}$ ), 4.74 (1H, br s,  $\text{CHCOPh}$ ), 4.18–4.24 (2H, m,  $\text{OCH}_2\text{C}$ ), 3.03–3.07 (2H, m,  $\text{CH}=\text{CHCOCHCH}$ ,  $\text{CCHC}=\text{C}$ ), 2.82 (1H, br s,  $\text{CHCH}_3$ ), 1.45 (3H, s,  $\text{CHCH}_3$ ), 0.91 (3H, d,  $J = 7.3$  Hz,  $\text{CHCH}_3$ ).  $^{13}\text{C}\{^1\text{H}\}$  NMR (100 MHz,  $\text{CDCl}_3$ )  $\delta$  201.7, 195.6, 151.7, 143.8, 135.4, 135.3, 133.7, 133.4, 129.0, 128.5, 128.3, 128.0, 125.4, 125.3, 80.0, 68.2, 47.6, 44.2, 42.0, 32.9, 23.8, 21.1, one carbon overlapped in aromatic region. HRMS (EI+):  $m/z$  Calcd for  $\text{C}_{27}\text{H}_{23}\text{F}_3\text{O}_3$ : ( $\text{M}^+$ ) 452.1599, found 452.1595.  $[\alpha]_{\text{D}}^{23} = (+) 166.3$  ( $c = 0.20$ , in  $\text{CHCl}_3$ ). **Chiral separation** (96% ee): The enantioselectivity was determined by SFC using Chiralpak IA (Back pressure = 15 MPa, Flow ( $\text{CO}_2$ ) = 3.0 mL/min, Flow (isopropanol) = 0.3 mL/min, 40 °C,  $\lambda = 250$  nm). Retention time:  $t_{\text{R}} = 2.4$  min (minor enantiomer) and 3.5 min (major enantiomer)

(2a<sup>1</sup>*S*,4*S*,5*R*,5a*R*,8a*S*)-5-Benzoyl-3-ethyl-4,8a-dimethyl-2,2a1,4,5,5a,8a-hexahydro-6*H*-naphtho[1,8-*bc*]furan-6-one (**3he**):

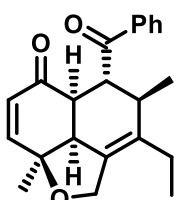

Following the general procedure, (*R,R*)-**L\*6**· $\text{HBF}_4$  (16.0 mg, 0.02 mmol),  $\text{NaO}^t\text{Bu}$  (2.0 mg, 0.02 mmol),  $\text{Ni}(\text{cod})_2$  (5.5 mg, 0.02 mmol), 4-methyl-4-(pent-2-yn-1-yloxy)cyclohexa-2,5-dien-1-one (**1h**, 45.2 mg, 0.24 mmol) and (*E*)-1-phenylbut-2-en-1-one (**2e**, 29.0 mg, 0.2 mmol) were used. Purification by silica gel flash column chromatography (5% EtOAc in hexane) gave **3he** (46.4 mg, 0.138 mmol, 69% yield) as thick oil.  $R_f = 0.4$  (20% EtOAc in hexane).  $^1\text{H NMR}$  (400 MHz,  $\text{CDCl}_3$ )  $\delta$  8.03 (2H, d,  $J = 7.3$  Hz, benzoyl-*ortho*-Ar-*H*), 7.58 (1H, dd,  $J = 7.3, 7.3$  Hz, benzoyl-*para*-Ar-*H*), 7.50 (2H, dd,  $J = 7.3, 7.3$  Hz, benzoyl-*meta*-Ar-*H*), 6.51 (1H, dd,  $J = 2.0, 10.2$  Hz,  $\text{CH}=\text{CHCO}$ ), 5.90 (1H, d,  $J = 10.2$  Hz,  $\text{CH}=\text{CHCO}$ ), 4.58 (1H, br s,  $\text{CHCOPh}$ ), 4.51 (1H, d,  $J = 12.5$  Hz,  $\text{OCH}_2\text{C}$ ), 4.26 (1H, d,  $J = 12.5$  Hz,  $\text{OCH}_2\text{C}$ ), 2.92 (1H, dd,  $J = 1.7, 5.7$  Hz,  $\text{CH}=\text{CHCOCHCH}$ ), 2.73–2.77 (1H, m,  $\text{CCHC}=\text{C}$ ), 2.70 (1H, br s,  $\text{CHCH}_3$ ), 2.03 (1H, dq,  $J = 7.5, 15.5$  Hz,  $\text{CH}_2\text{CH}_3$ ), 1.90 (1H, dq,  $J = 7.5, 15.5$  Hz,  $\text{CH}_2\text{CH}_3$ ), 1.40 (3H, s,  $\text{CCH}_3$ ), 1.10 (3H, d,  $J = 7.5$  Hz,  $\text{CHCH}_3$ ), 0.96 (3H, t,  $J = 7.5$  Hz,  $\text{CH}_2\text{CH}_3$ ).  $^{13}\text{C}\{^1\text{H}\}$  NMR (100 MHz,  $\text{CDCl}_3$ )  $\delta$  202.0, 196.3, 152.0, 135.6, 134.3, 133.2, 130.7, 128.9, 128.5, 128.0, 79.7, 68.2, 48.2, 43.9, 42.2, 30.6, 24.1, 24.0, 20.5, 12.3. HRMS (EI+):  $m/z$  Calcd for  $\text{C}_{22}\text{H}_{24}\text{O}_3$ : ( $\text{M}^+$ ) 336.1725, found 336.1723.  $[\alpha]_{\text{D}}^{20} = (+)$

113.7 ( $c = 0.28$ , in  $\text{CHCl}_3$ ). **Chiral separation** (98% ee): The enantioselectivity was determined by SFC using Chiralpak IA (Back pressure = 15 MPa, Flow ( $\text{CO}_2$ ) = 3.0 mL/min, Flow (isopropanol) = 0.3 mL/min, 25 °C,  $\lambda = 250$  nm). Retention time:  $t_R = 2.4$  min (minor enantiomer) and 3.4 min (major enantiomer)

**(2a<sup>1S</sup>,4S,5R,5aR,8aS)-5-Benzoyl-4-(4-fluorophenyl)-8a-methyl-3-(((triethylsilyl)oxy)methyl)-2,2a1,4,5,5a,8a-hexahydro-6H-naphtho[1,8-bc]furan-6-one (3ic):** Following the general procedure,

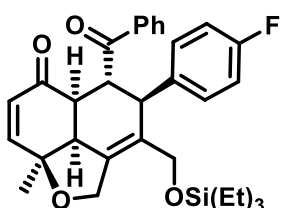

(*R,R*)-**L\*6**· $\text{HBF}_4$  (8.2 mg, 0.01 mmol),  $\text{NaO}^t\text{Bu}$  (1.0 mg, 0.02 mmol),  $\text{Ni}(\text{cod})_2$  (2.75 mg, 0.01 mmol), 4-methyl-4-(((triethylsilyl)oxy)but-2-yn-1-yl)oxy)cyclohexa-2,5-dien-1-one (**1i**, 33.6 mg, 0.12 mmol) and (*E*)-3-(4-fluorophenyl)-1-phenylprop-2-en-1-one (**2c**, 22.6 mg, 0.1

mmol) were used. Purification by silica gel flash column chromatography (5% EtOAc in hexane) gave **3ic** (39.0 mg, 0.07 mmol, 74% yield) as a white amorphous solid.  $R_f = 0.4$  (20% EtOAc in hexane).  $^1\text{H NMR}$  (400 MHz,  $\text{CDCl}_3$ )  $\delta$  7.95 (2H, d,  $J = 7.5$  Hz, benzoyl-*ortho*-Ar-*H*), 7.55 (1H, dd,  $J = 7.5, 7.5$  Hz, benzoyl-*para*-Ar-*H*), 7.43 (2H, dd,  $J = 7.5, 7.5$  Hz, benzoyl-*para*-Ar-*H*), 6.90–6.99 (4H, m, Ar-*H*), 6.59 (1H, dd,  $J = 2.0, 10.2$  Hz,  $\text{CH}=\text{CHCO}$ ), 5.99 (1H, d,  $J = 10.2$  Hz,  $\text{CH}=\text{CHCO}$ ), 4.85 (1H, dd,  $J = 1.5, 3.0$  Hz,  $\text{CHCOPh}$ ), 4.77 (1H, dq,  $J = 1.5, 13.0$  Hz,  $\text{OCH}_2\text{C}$ ), 4.43 (1H, d,  $J = 13.0$  Hz,  $\text{OCH}_2\text{C}$ ), 4.00 (1H, t,  $J = 2.6$  Hz,  $\text{CHAr}$ ), 3.84 (1H, d,  $J = 13.2$  Hz,  $\text{CH}_2\text{OTES}$ ), 3.77 (1H, d,  $J = 13.2$  Hz,  $\text{CH}_2\text{OTES}$ ), 2.97 (1H, dd,  $J = 1.5, 5.7$  Hz,  $\text{CH}=\text{CHCOCHCH}$ ), 2.81 (1H, br s,  $\text{CCHC}=\text{C}$ ), 1.46 (3H, s,  $\text{CCH}_3$ ), 0.82 (9H, t,  $J = 8.0$  Hz,  $\text{CH}_2\text{CH}_3$ ), 0.44 (6H, t,  $J = 8.0$  Hz,  $\text{CH}_2\text{CH}_3$ ).  $^{13}\text{C}\{^1\text{H}\}$  NMR (100 MHz,  $\text{CDCl}_3$ )  $\delta$  200.9, 195.4, 162.6 (d,  $J_{\text{CF}} = 237.6$  Hz), 151.9, 138.7 (d,  $J_{\text{CF}} = 3.1$  Hz), 135.4 (d,  $J_{\text{CF}} = 32.2$  Hz), 133.4, 130.5 (d,  $J_{\text{CF}} = 7.3$  Hz), 129.4, 129.1, 128.8, 128.3, 123.8, 115.1 (d,  $J_{\text{CF}} = 21.8$  Hz), 79.1, 68.6, 62.8, 49.4, 44.9, 43.3, 41.4, 23.8, 6.6, 4.1. **HRMS** (EI<sup>+</sup>):  $m/z$  Calcd for  $\text{C}_{32}\text{H}_{37}\text{FO}_4\text{Si}$ : ( $\text{M}^+$ ) 532.2445, found 532.2441.  $[\alpha]_{\text{D}}^{20} = (+) 103.6$  ( $c = 0.19$ , in  $\text{CHCl}_3$ ). **Chiral separation** (95% ee): The enantioselectivity was determined by SFC using Chiralpak IA (Back pressure = 15 MPa, Flow ( $\text{CO}_2$ ) = 3.0 mL/min, Flow (isopropanol) = 0.3 mL/min, 25 °C,  $\lambda = 250$  nm). Retention time:  $t_R = 2.5$  min (minor enantiomer) and 3.4 min (major enantiomer).

**(2a<sup>1S</sup>,4S,5R,5aR,8aS)-5-Benzoyl-4-(4-chlorophenyl)-8a-methyl-3-(((triethylsilyl)oxy)methyl)-2,2a1,4,5,5a,8a-hexahydro-6H-naphtho[1,8-bc]furan-6-one (3ik):** Following the general procedure, (*R,R*)-**L\*6**· $\text{HBF}_4$  (8.1 mg, 0.02 mmol),  $\text{NaO}^t\text{Bu}$  (1.0 mg, 0.01 mmol),  $\text{Ni}(\text{cod})_2$  (2.76 mg, 0.01 mmol), 4-methyl-4-(((triethylsilyl)oxy)but-2-yn-1-yl)oxy)cyclohexa-2,5-dien-1-one (**1i**, 33.6 mg, 0.12

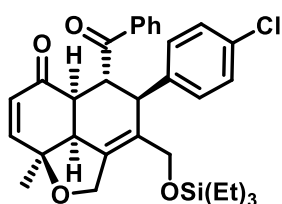

mmol) and (*E*)-3-(4-chlorophenyl)-1-phenylprop-2-en-1-one (**2k**, 24.0 mg, 0.1 mmol) were used. Purification by silica gel flash column chromatography (10% EtOAc in hexane) gave **3ik** (42.0 mg, 0.08 mmol, 77% yield) as a white amorphous solid.  $R_f = 0.4$  (20% EtOAc in hexane).

**$^1\text{H}$  NMR** (400 MHz,  $\text{CDCl}_3$ )  $\delta$  7.95 (2H, d,  $J = 7.6$  Hz, benzoyl-*ortho*-Ar-H), 7.55 (1H, dd,  $J = 7.6, 7.6$  Hz, benzoyl-*para*-Ar-H), 7.43 (2H, dd,  $J = 7.6, 7.6$  Hz, benzoyl-*para*-Ar-H), 7.20 (2H,  $J = 8.3$  Hz, Ar-H), 6.94 (2H,  $J = 8.3$  Hz, Ar-H), 6.59 (1H, dd,  $J = 1.8, 10.2$  Hz, CH=CHCO), 5.99 (1H, d,  $J = 10.2$  Hz, CH=CHCO), 4.83 (1H, dd,  $J = 1.5, 3.1$  Hz, CHCOPh), 4.77 (1H, dq,  $J = 1.8, 13.9$  Hz, OCH<sub>2</sub>C), 4.43 (1H, d,  $J = 13.9$  Hz, OCH<sub>2</sub>C), 4.00 (1H, t,  $J = 2.7$  Hz, CHAr), 3.85 (1H, d,  $J = 13.2$  Hz, CH<sub>2</sub>OTES), 3.77 (1H, d,  $J = 13.2$  Hz, CH<sub>2</sub>OTES), 2.97 (1H, dd,  $J = 1.3, 5.9$  Hz, CH=CHCOCHCH), 2.80 (1H, br s, CCHC=C), 1.46 (3H, s, CCH<sub>3</sub>), 0.83 (9H, t,  $J = 8.0$  Hz, CH<sub>2</sub>CH<sub>3</sub>), 0.44 (6H, t,  $J = 8.0$  Hz, CH<sub>2</sub>CH<sub>3</sub>).  **$^{13}\text{C}\{^1\text{H}\}$  NMR** (100 MHz,  $\text{CDCl}_3$ )  $\delta$  200.8, 195.3, 152.0, 141.6, 135.8, 135.2, 133.4, 132.4, 130.4, 128.9, 128.8, 128.4, 128.3, 79.1, 68.6, 62.8, 49.3, 44.8, 43.3, 41.5, 23.8, 6.6, 4.1, one carbon overlapped in aromatic region. **HRMS** (EI+):  $m/z$  Calcd for C<sub>32</sub>H<sub>37</sub>ClO<sub>4</sub>Si: (M<sup>+</sup>) 548.2140, found 548.2140.  $[\alpha]_D^{23} = (+) 149.3$  ( $c = 0.15$ , in  $\text{CHCl}_3$ ). **Chiral separation** (97% ee, 100% ee after single recrystallization): The enantioselectivity was determined by SFC using Chiralpak IA (Back pressure = 15 MPa, Flow (CO<sub>2</sub>) = 3.0 mL/min, Flow (isopropanol) = 0.3 mL/min, 25 °C,  $\lambda = 250$  nm). Retention time:  $t_R = 3.1$  min (minor enantiomer) and 4.5 min (major enantiomer).

### Synthetic Applications of **3aa**

(2a<sup>1S</sup>,4S,5aR,8aS)-5-Benzoyl-4-(4-methoxyphenyl)-3,8a-dimethyl-2a<sup>1</sup>,5,5a,8a-tetrahydro-2H-na phtho[1,8-*bc*]furan-2,6(4H)-dione (**4**): To a solution of **3aa** (41 mg, 0.10 mmol) in  $\text{CH}_2\text{Cl}_2$  (1 mL)

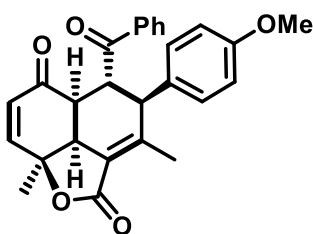

in a flask under N<sub>2</sub> at room temperature was added pyridine (10  $\mu\text{L}$ ) and PCC (22.0 mg, 0.1 mmol). The resulting solution was heated with stirring at 50 °C for 3 h. The reaction mixture was cooled to room temperature and another portion of pyridine (10  $\mu\text{L}$ ) and PCC (22.0 mg, 0.1 mmol) were added and again heated for another 3 h. The

resulting brown solution was stirred at room temperature for 24 h to complete the reaction. The solid was filtered off and washed with  $\text{CH}_2\text{Cl}_2$ , concentrated under vacuo and purified by silica gel flash chromatography (25% ethyl acetate in hexanes) to get pure lactone **4** (39.0 mg, 0.09 mmol, 90%) as thick oil.  $R_f = 0.2$  (30% EtOAc in hexane).  **$^1\text{H}$  NMR** (400 MHz,  $\text{CDCl}_3$ )  $\delta$  7.99 (2H, d,  $J = 7.3$  Hz,

benzoyl-*ortho*-Ar-*H*), 7.59 (1H, dd,  $J = 7.3, 7.3$  Hz, benzoyl-*para*-Ar-*H*), 7.47 (2H, dd,  $J = 7.3, 7.3$  Hz, benzoyl-*meta*-Ar-*H*), 6.87 (2H,  $J = 8.4$  Hz, Ar-*H*), 6.80 (2H,  $J = 8.4$  Hz, Ar-*H*), 6.67 (1H, dd,  $J = 1.6, 10.0$  Hz, CH=CHCO), 6.06 (1H, d,  $J = 10.0$  Hz, CH=CHCO), 4.94 (1H, br s, CHCOPh), 3.94 (1H, s, CHAr), 3.78 (3H, s, OCH<sub>3</sub>), 3.22 (1H, br s, CH=CHCOCHCH), 3.01 (1H, d,  $J = 6.6$  Hz, CCHC=C), 2.04 (3H, d,  $J = 2.2$  Hz, C=CCH<sub>3</sub>), 1.63 (3H, br s, CCH<sub>3</sub>). <sup>13</sup>C{<sup>1</sup>H} NMR (100 MHz, CDCl<sub>3</sub>)  $\delta$  200.5, 193.6, 167.2, 158.6, 153.4, 147.4, 134.6, 133.8, 133.5, 130.1, 129.0, 128.9, 127.9, 120.9, 114.0, 78.7, 55.2, 48.8, 46.3, 43.0, 41.6, 24.7, 17.4. **HRMS** (EI<sup>+</sup>):  $m/z$  Calcd for C<sub>27</sub>H<sub>24</sub>O<sub>5</sub>: (M<sup>+</sup>) 428.1624, found 428.1622.  $[\alpha]_D^{23} = (+) 205.3$  ( $c = 0.11$ , in CHCl<sub>3</sub>). **Chiral separation** (98% ee): The enantioselectivity was determined by SFC using Chiralpak IA (Back pressure = 15 MPa, Flow (CO<sub>2</sub>) = 2.4 mL/min, Flow (isopropanol) = 0.6 mL/min, 40 °C,  $\lambda = 250$  nm). Retention time:  $t_R = 4.3$  min (minor enantiomer) and 5.3 min (major enantiomer).

**(2a<sup>1</sup>S,4S,5aR,6aS,7aR,7bR)-5-Benzoyl-4-(4-methoxyphenyl)-3,7b-dimethyl-2,2a<sup>1</sup>,4,5,5a,6a,7a,7b-octahydro-6H-oxireno[2',3':2,3]naphtho[1,8-*bc*]furan-6-one (5)**: To a solution of **3aa** (41.0 mg,

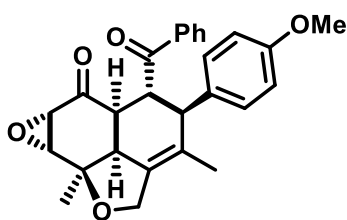

0.10 mmol) in MeOH:CH<sub>2</sub>Cl<sub>2</sub> (3:1) (0.4 mL), H<sub>2</sub>O<sub>2</sub> (30 wt. % in H<sub>2</sub>O) (0.2 mL) and NaOH (20 wt. % in H<sub>2</sub>O) (0.1 mL) were added sequentially at 0 °C. The reaction was allowed to stir at 0 °C to rt for overnight. The reaction was quenched with sat. Na<sub>2</sub>S<sub>2</sub>O<sub>3</sub>(aq.) (5 mL) to quench excess peroxides. The reaction was partitioned

between CH<sub>2</sub>Cl<sub>2</sub> (15 mL) and H<sub>2</sub>O (10 mL). The layers were separated and the aqueous layer was extracted with CH<sub>2</sub>Cl<sub>2</sub> (2 x 10 mL). The combined organic layers was washed with brine, dried over Na<sub>2</sub>SO<sub>4</sub>, filtered, and concentrated in vacuo. The crude residue was purified by silica gel flash column chromatography (10% EtOAc in hexane) to afford epoxide **5** (32.1 mg, 0.07 mmol, 75% yield) as a white solid.  $R_f = 0.4$  (20% EtOAc in hexane). <sup>1</sup>H NMR (400 MHz, CDCl<sub>3</sub>)  $\delta$  7.74 (2H, d,  $J = 8.0$  Hz, benzoyl-*ortho*-Ar-*H*), 7.51 (1H, dd,  $J = 7.4, 8.0$  Hz, benzoyl-*para*-Ar-*H*), 7.36 (2H, dd,  $J = 7.4, 8.0$  Hz, benzoyl-*meta*-Ar-*H*), 7.17 (2H, br s, Ar-*H*), 6.81 (2H, d  $J = 7.4$  Hz, Ar-*H*), 4.74 (1H, dd,  $J = 1.2, 6.3$  Hz, CHCOPh), 4.53 (1H, doublet,  $J = 13.3$  Hz, OCH<sub>2</sub>C), 4.44 (1H,  $J = 13.3$  Hz, OCH<sub>2</sub>C), 3.89 (1H, br s, CHAr), 3.76 (3H, s, OCH<sub>3</sub>), 3.40–3.43 (2H, m, CHOCH), 3.31 (1H, d  $J = 4.8$  Hz, OCHCOCHCH), 2.75 (1H, br s, CCHC=C), 1.60 (3H, s, CCH<sub>3</sub>), 1.31 (3H, br s, C=CCH<sub>3</sub>). <sup>13</sup>C{<sup>1</sup>H} NMR (100 MHz, CDCl<sub>3</sub>)  $\delta$  204.1, 201.4, 158.3, 135.7, 134.7, 133.3, 132.8, 129.3, 128.7, 128.6, 113.7, 79.6, 69.0, 63.8, 55.7, 55.2, 49.6, 48.1, 44.4, 42.7, 23.9, 18.0, one carbon overlapped in aromatic region. **HRMS** (EI<sup>+</sup>):  $m/z$  Calcd for C<sub>27</sub>H<sub>26</sub>O<sub>5</sub>: (M<sup>+</sup>) 430.1780, found 430.1781.  $[\alpha]_D^{23} = (+) 54.7$  ( $c = 0.07$ , in CHCl<sub>3</sub>). **Chiral separation** (98% ee): The enantioselectivity was determined

by SFC using Chiralpak IA (Back pressure = 15 MPa, Flow (CO<sub>2</sub>) = 2.4 mL/min, Flow (isopropanol) = 0.6 mL/min, 40 °C, λ = 250 nm). Retention time: *t*<sub>R</sub> = 2.6 min (minor enantiomer) and 2.9 min (major enantiomer).

**Diethyl 2-((2a<sup>1</sup>S,4S,5aR,8S,8aS)-5-benzoyl-4-(4-methoxyphenyl)-3,8a-dimethyl-6-oxo-2a<sup>1</sup>,4,5,5a,6,7,8,8a-octahydro-2H-naphtho[1,8-*bc*]furan-8-yl)malonate (6):** To a solution of **3aa** (22.0 mg,

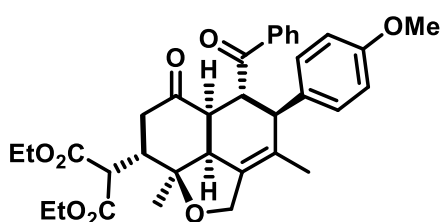

0.053 mmol) in THF (2 mL) was added sodium diethyl malonate (11.7 mg, 0.063 mmol) at room temperature and stirred for 6 h. The reaction was diluted with ether the added water. The reaction was partitioned. The layers were separated and the aqueous layer was extracted with ether (2

x 10 mL). The combined organic extracts were dried over Na<sub>2</sub>SO<sub>4</sub>, filtered, and concentrated *in vacuo*. The crude residue was purified by silica gel flash column chromatography to afford epoxide **6** (26.0 mg, 0.045 mmol, 85% yield) as a white amorphous solid. <sup>1</sup>H NMR (400 MHz, CDCl<sub>3</sub>) δ 7.93 (2H, d, *J* = 7.6 Hz, benzoyl-*ortho*-Ar-*H*), 7.56 (1H, dd, *J* = 7.6, 7.6 Hz, benzoyl-*para*-Ar-*H*), 7.45 (2H, dd, *J* = 7.6, 7.6 Hz, benzoyl-*meta*-Ar-*H*), 6.94 (2H, d, *J* = 9.0 Hz, Ar-*H*), 6.84 (2H, d, *J* = 9.0 Hz, Ar-*H*), 4.76 (1H, br s, *CHCOPh*), 4.45 (2H, br s, *OCH<sub>2</sub>C*), 4.16–4.28 (4H, *CH<sub>2</sub>CH<sub>3</sub>*), 3.79 (3H, s, *OCH<sub>3</sub>*), 3.66 (1H, br s, *CHAr*), 3.48 (1H, d, *J* = 9.5 Hz, *CH(CO<sub>2</sub>Et)<sub>2</sub>*), 2.98 (1H, ddd, *J* = 3.3, 9.5, 13.7 Hz, *CHCH<sub>2</sub>*), 2.83 (1H, d, *J* = 8.1 Hz, *CH<sub>2</sub>COCHCH*), 2.70–2.73 (1H, m, *CCHC=C*), 2.50 (1H, dd, *J* = 3.8, 16.1 Hz, *CHCH<sub>2</sub>*), 2.15 (1H, dd, *J* = 14.7, 16.1 Hz, *CHCH<sub>2</sub>*), 1.50 (3H, br s, *C=CCH<sub>3</sub>*), 1.46 (3H, s, *CCH<sub>3</sub>*), 1.31 (3H, t, *J* = 7.1, Hz, *CH<sub>2</sub>CH<sub>3</sub>*), 1.28 (3H, t, *J* = 7.1, Hz, *C H<sub>2</sub>CH<sub>3</sub>*). <sup>13</sup>C{<sup>1</sup>H} NMR (100 MHz, CDCl<sub>3</sub>) δ 204.6, 201.5, 168.2, 168.1, 158.3, 135.2, 135.1, 133.3, 132.8, 129.8, 128.9, 128.7, 126.2, 113.7, 82.3, 67.0, 61.7, 61.6, 55.1, 52.3, 48.1, 47.7, 44.4, 44.2, 41.0, 37.6, 18.6, 18.2, 14.0, 13.9. HRMS (EI<sup>+</sup>): *m/z* Calcd for C<sub>34</sub>H<sub>38</sub>O<sub>8</sub>: (M<sup>+</sup>) 574.2567, found 574.2564. [α]<sub>D</sub><sup>20</sup> = (+) 71.2 (*c* = 0.14, in CHCl<sub>3</sub>). **Chiral separation** (98% ee): The enantioselectivity was determined by SFC using Chiralpak IA (Back pressure = 15 MPa, Flow (CO<sub>2</sub>) = 2.4 mL/min, Flow (isopropanol) = 0.6 mL/min, 40 °C, λ = 250 nm). Retention time: *t*<sub>R</sub> = 3.1 min (minor enantiomer) and 4.4 min (major enantiomer).

**(2a<sup>1</sup>S,4S,5R,5aR,8aS)-5-Benzoyl-4-(4-methoxyphenyl)-3,8a-dimethyl-2,2a<sup>1</sup>,4,5,5a,7,8,8a-octahydro-6H-naphtho[1,8-*bc*]furan-6-one (7):** To a solution of **3aa** (25.4 mg, 0.06 mmol) in ethyl acetate (5 mL) was added Pd/C (10% w/w, 3.5 mg) and stirred for 6 hours at ambient temperature under an atmospheric pressure of hydrogen (1 atm). The solid was filtered off and filtrate was



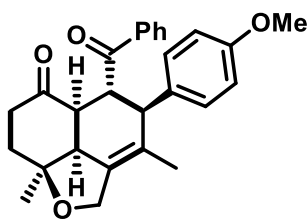

concentrated in vacuo. The residue was purified by silica gel flash column chromatography (10% EtOAc in hexane) to afford **7** (22.2 mg, 0.053 mmol, 89%) as thick colorless oil.  $R_f = 0.4$  (20% EtOAc in hexane).  $^1\text{H NMR}$  (400 MHz,  $\text{CDCl}_3$ )  $\delta$  7.89 (2H, d,  $J = 7.3$  Hz, benzoyl-*ortho*-Ar-H), 7.52 (1H, dd,  $J = 7.3, 7.3$  Hz, benzoyl-*para*-Ar-H), 7.40 (2H, dd,  $J = 7.3, 7.3$  Hz, benzoyl-*meta*-Ar-H), 7.01 (2H,  $J = 8.7$  Hz, Ar-H), 6.79 (2H,  $J = 8.7$  Hz, Ar-H), 4.81 (1H, dd,  $J = 1.5, 4.6$  Hz,  $\text{CHCOPh}$ ), 4.55 (1H, d,  $J = 12.6$  Hz,  $\text{OCH}_2\text{C}$ ), 4.44 (1H, apparent quintet of doublet,  $J = 1.7, 12.6$  Hz,  $\text{OCH}_2\text{C}$ ), 3.80 (1H, s,  $\text{CHAr}$ ), 3.75 (3H, s,  $\text{OCH}_3$ ), 2.83 (1H, dd,  $J = 1.5, 6.8$  Hz,  $\text{CH}_2\text{COCHCH}$ ), 2.70–2.72 (1H, m,  $\text{CCHC}=\text{C}$ ), 2.52 (1H, ddd,  $J = 4.8, 10.5, 15.6$  Hz,  $\text{CH}_2\text{CH}_2\text{CO}$ ), 2.31 (1H, dt,  $J = 5.5, 17.8$  Hz,  $\text{CH}_2\text{CH}_2\text{CO}$ ), 2.02–2.09 (1H, m,  $\text{CH}_2\text{CH}_2\text{CO}$ ), 1.84 (1H, ddd,  $J = 4.8, 10.5, 15.6$  Hz,  $\text{CH}_2\text{CH}_2\text{CO}$ ), 1.41 (3H, s,  $\text{CCH}_3$ ), 1.38 (3H, br s,  $\text{C}=\text{CCH}_3$ ).  $^{13}\text{C}\{^1\text{H}\}$  NMR (100 MHz,  $\text{CDCl}_3$ )  $\delta$  208.6, 201.8, 158.1, 135.5, 134.9, 134.4, 133.1, 130.1, 128.6 (two carbons), 126.6, 113.6, 81.6, 67.6, 55.0, 47.5, 46.8, 45.4, 44.1, 35.4, 32.1, 26.4, 17.9. HRMS (EI+):  $m/z$  Calcd for  $\text{C}_{27}\text{H}_{28}\text{O}_4$ : ( $\text{M}^+$ ) 416.1988, found 416.1986.  $[\alpha]_{\text{D}}^{23} = (+) 177.3$  ( $c = 0.11$ , in  $\text{CHCl}_3$ ).  $[\alpha]_{\text{D}}^{20} = (+) 110.7$  ( $c = 0.06$ , in  $\text{CHCl}_3$ ). **Chiral separation** (98% ee): The enantioselectivity was determined by SFC using Chiralpak IA (Back pressure = 15 MPa, Flow ( $\text{CO}_2$ ) = 3.0 mL/min, Flow (isopropanol) = 0.3 mL/min, 40 °C,  $\lambda = 250$  nm). Retention time:  $t_{\text{R}} = 5.5$  min (minor enantiomer) and 5.7 min (major enantiomer).

### Isolation of $\eta^3$ -oxaallyl nickelacycle (**8**)

To a benzene solution of  $\text{Ni}(\text{cod})_2$  (275.0 mg, 1.0 mmol) and IPr (389.0 mg, 1.0 mmol) was added **1a** (176.0 mg, 1.0 mmol) at room temperature. Resulting dark brown mixture was stirred for 5 minutes and then volatiles were removed under vacuum to give brown solids (622.0 mg, 1.0 mmol, 99%). A single crystal suitable for X-ray diffraction analysis was obtained by recrystallization from  $\text{Et}_2\text{O}$ /hexane at  $-30$  °C, indicated the formation of  $\eta^3$ -oxaallyl nickelacycle of structure **8**. The characteristic resonances of the **8** were attributed as follows;

$^1\text{H NMR}$  (400 MHz,  $\text{C}_6\text{D}_6$ ):  $\delta$  7.12–7.32 (6H, m, ArH), 6.66 (2H, s,  $\text{NCH}=\text{CHN}$ ), 5.95 (1H, d,  $J = 10.1$  Hz,  $\text{CH}=\text{CHCO}$ ), 5.49 (1H, d,  $J = 10.1$  Hz,  $\text{CH}=\text{CHCO}$ ), 4.60 (1H, dd,  $J = 6.2, 2.0$  Hz,  $\eta^3\text{CH}(\text{CH}=\text{CO})\text{Ni}$ ), 3.87 (1H, d,  $J = 9.4$  Hz,  $\text{OCH}_2\text{C}$ ), 3.72 (1H, d,  $J = 9.4$  Hz,  $\text{OCH}_2\text{C}$ ), 3.19 (2H, sept,  $J = 6.8$  Hz, *iPr*-CH), 2.99 (2H, sept,  $J = 6.8$  Hz, *iPr*-CH), 2.74 (1H, d,  $J = 5.9$  Hz,  $\text{CCHC}=\text{C}$ ), 1.47 (6H, d,  $J = 6.8$  Hz, *iPr*- $\text{CH}_3$ ), 1.43 (6H, d,  $J = 6.8$  Hz, *iPr*- $\text{CH}_3$ ), 1.20 (3H, s,  $\text{C}=\text{CCH}_3$ ), 1.14 (3H, s,  $\text{CCH}_3$ ), 1.03 (12H, d,  $J = 7.2$  Hz, s).  $^{13}\text{C NMR}$   $\{^1\text{H}\}$  NMR (100 MHz,  $\text{C}_6\text{D}_6$ ):  $\delta$  190.6 (NCN), 163.1 ( $(\text{CH}=\text{CH})\text{COCHNi}$ ), 147.7 ( $\text{COCH}=\text{CHC}$ ), 146.8 (Ar), 146.5 (Ar), 142.0 ( $\text{CH}_2\text{C}=\text{C}$ ), 141.0

(C=CCH<sub>3</sub>), 136.5 (*Ar*), 130.1 (*Ar*), 125.4 (COCH=CH), 124.5 (*Ar*), 124.3 (*Ar*), 124.2 (*Ar*), 124.0 (NCH=CHN), 75.8 ((CH=CH)COCHNi), 75.4 (CH=CHCCH<sub>3</sub>), 59.9 (OCH<sub>2</sub>C), 53.1 (CCHC=C), 29.0 (*iPr*-CHCH<sub>3</sub>), 28.9 (CCH<sub>3</sub>), 27.3 (C=CCH<sub>3</sub>), 26.5 (*g*), 26.4 (*iPr*-CH<sub>3</sub>), 26.3 (*iPr*-CH<sub>3</sub>), 22.8 (*iPr*-CH<sub>3</sub>), 22.6 (*iPr*-CH<sub>3</sub>). Elemental analysis did not give perfect result probably due to extremely high sensitivity of the complex to the air and moisture. However, best result could be obtained as follows; Elemental Analysis: C, 73.20; H, 7.76; N, 4.49; Ni, 9.41; O, 5.13, found C, 72.66; H, 7.69; N, 4.69.

# Supplementary Figures

## Supplementary Figure 2. $^1\text{H}$ and $^{13}\text{C}$ -NMR spectra of product 1f

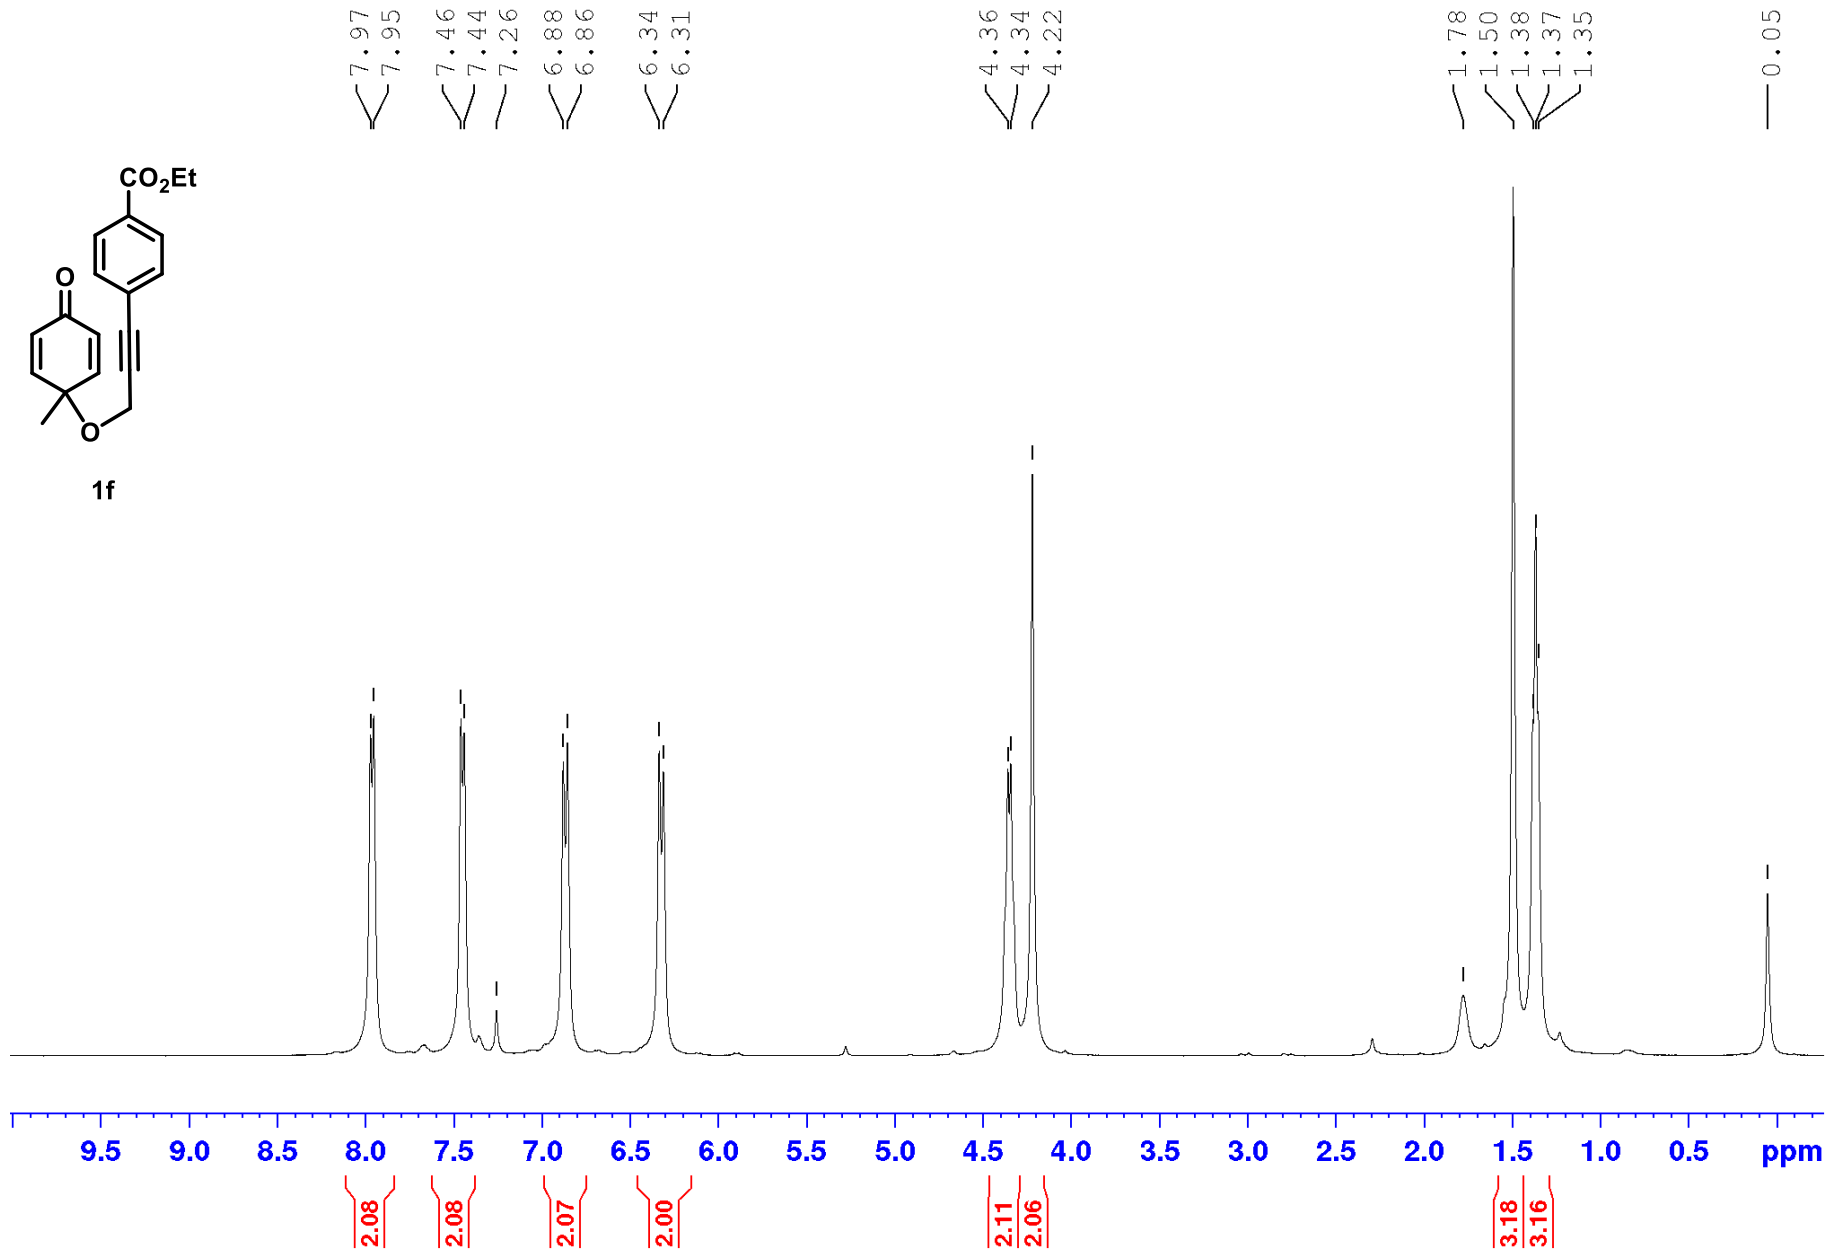

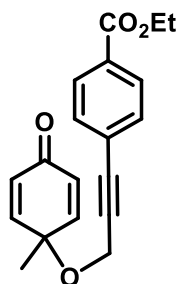

1f

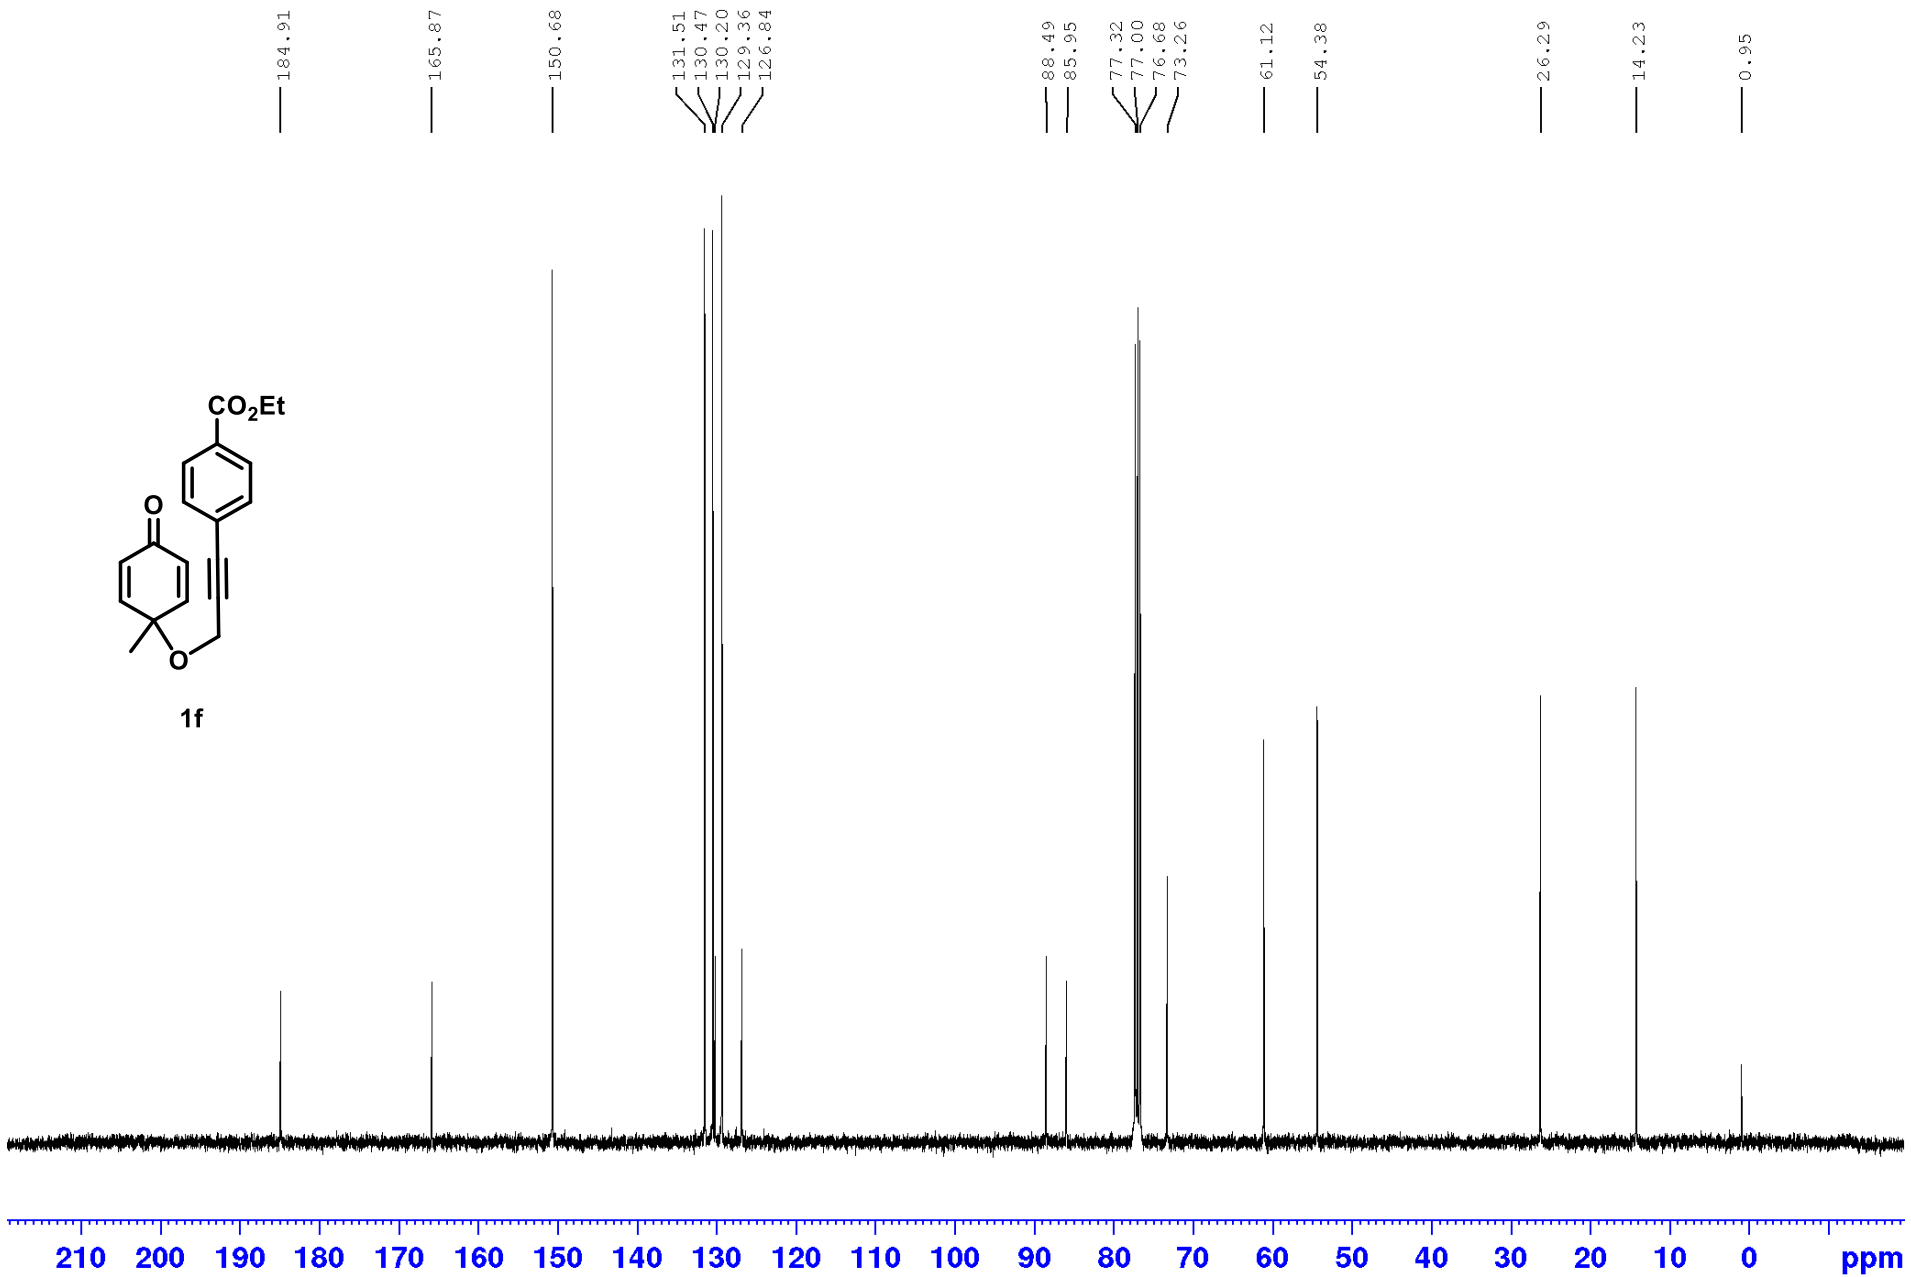

### Supplementary Figure 3. <sup>1</sup>H and <sup>13</sup>C-NMR spectra of product 1g

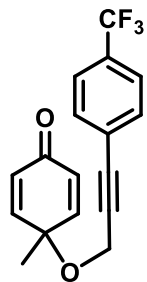

1g

7.58  
7.56  
7.52  
7.50  
7.26  
6.89  
6.89  
6.87  
6.87  
6.36  
6.35  
6.33

4.24

1.61  
1.52

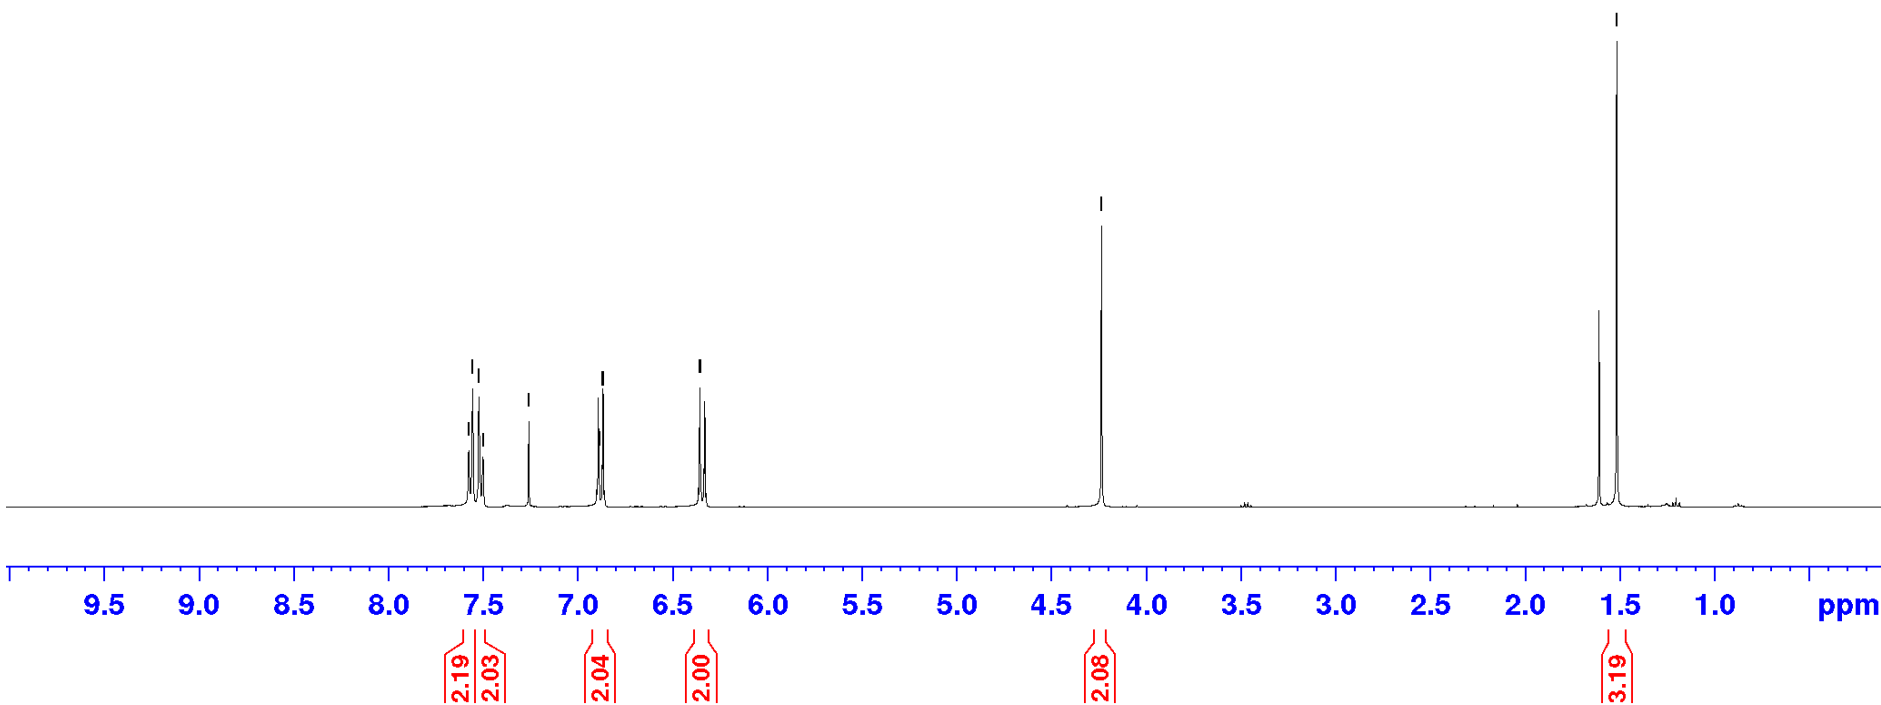

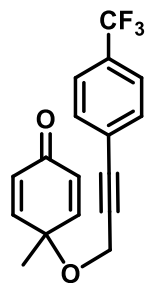

**1g**

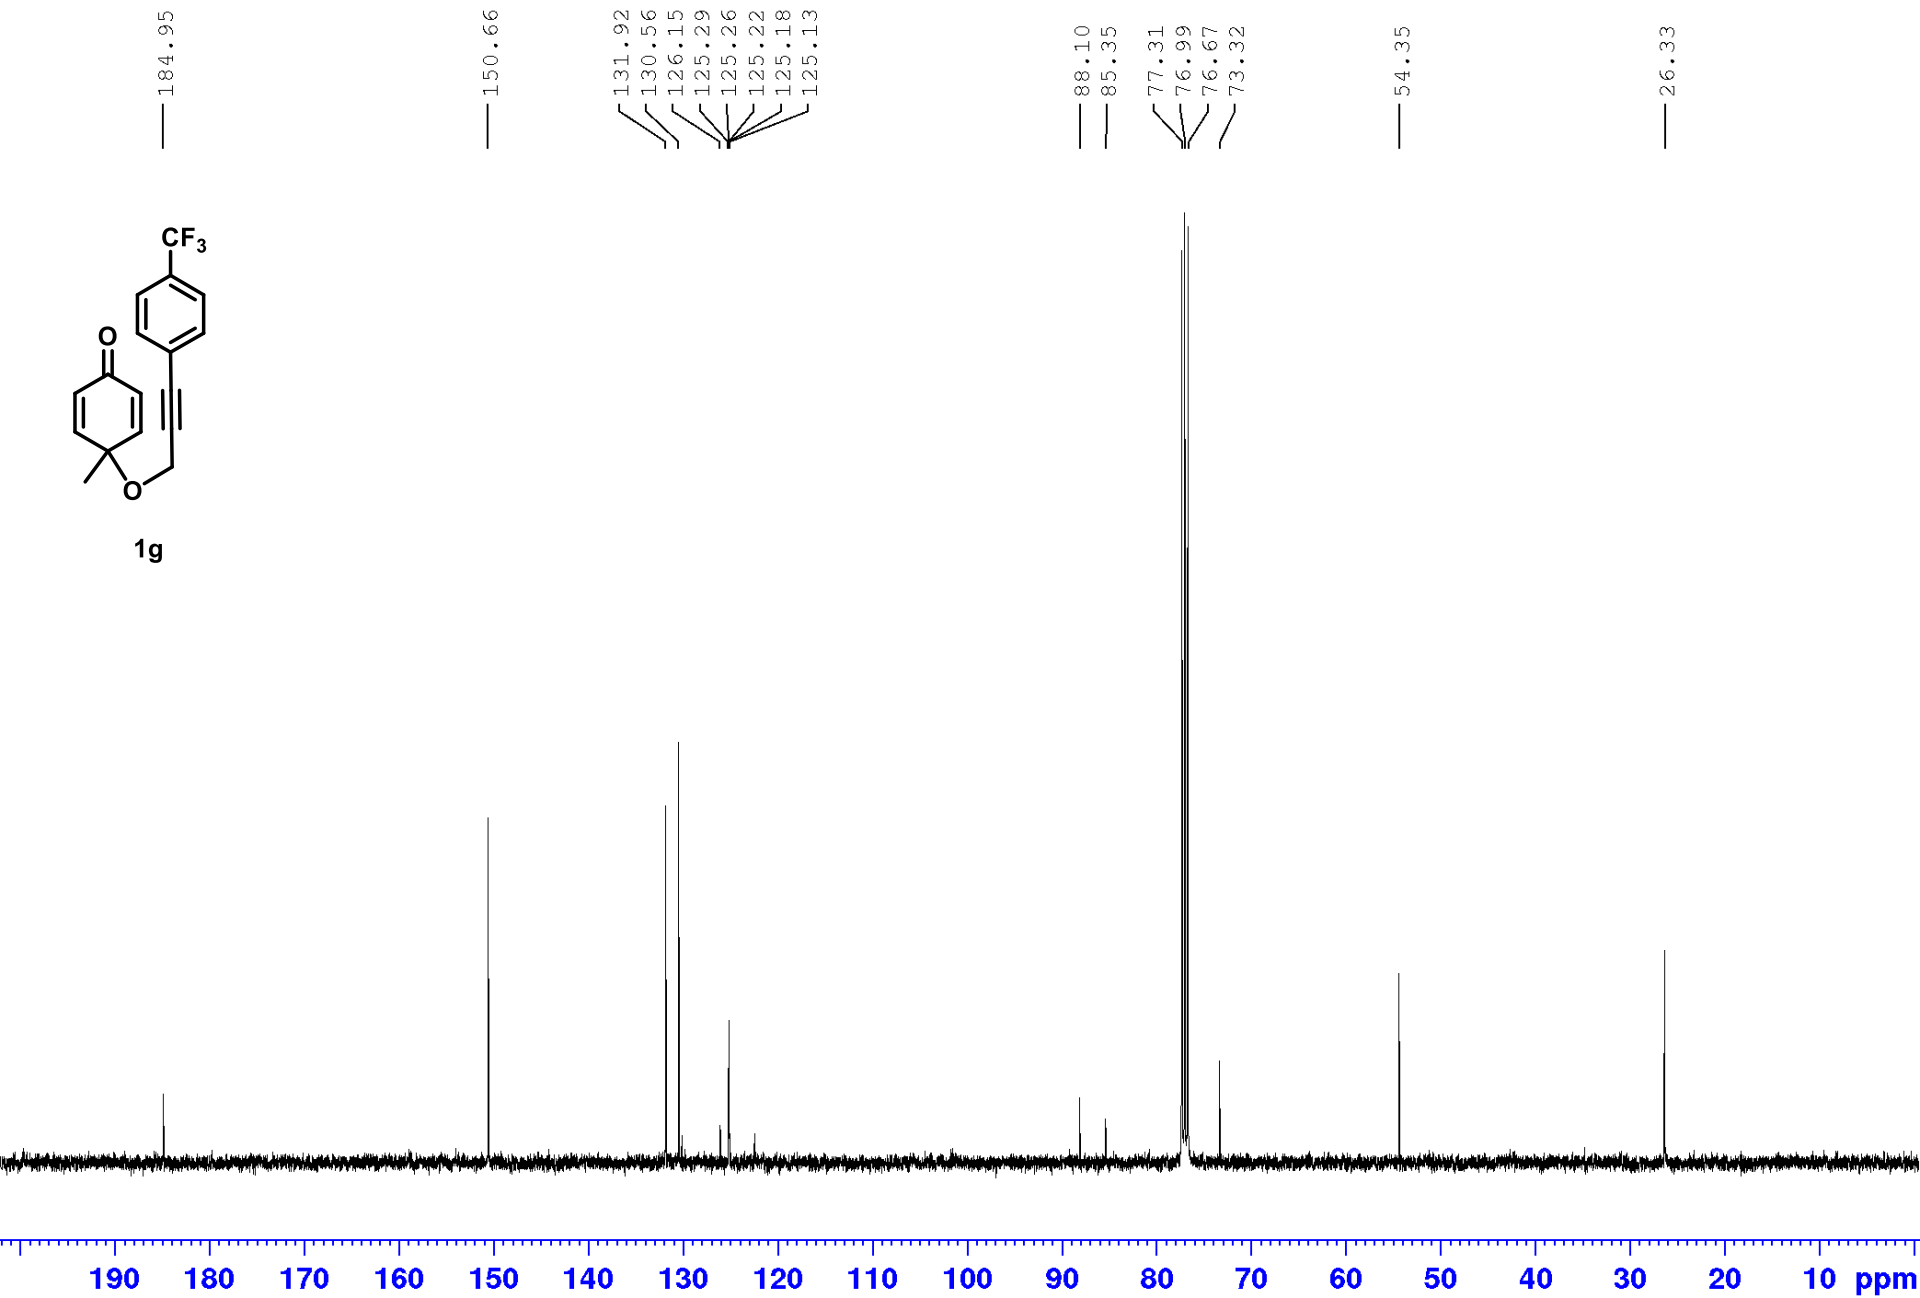

# Supplementary Figure 4. <sup>1</sup>H and <sup>13</sup>C-NMR spectra of product 1i

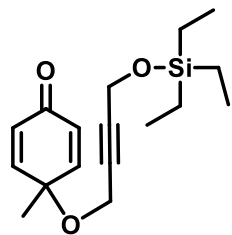

1i

7.26  
6.83  
6.80  
6.30  
6.28  
4.32  
4.31  
4.31  
4.01  
4.01  
4.00  
1.63  
1.46  
0.98  
0.96  
0.94  
0.65  
0.63  
0.61  
0.59

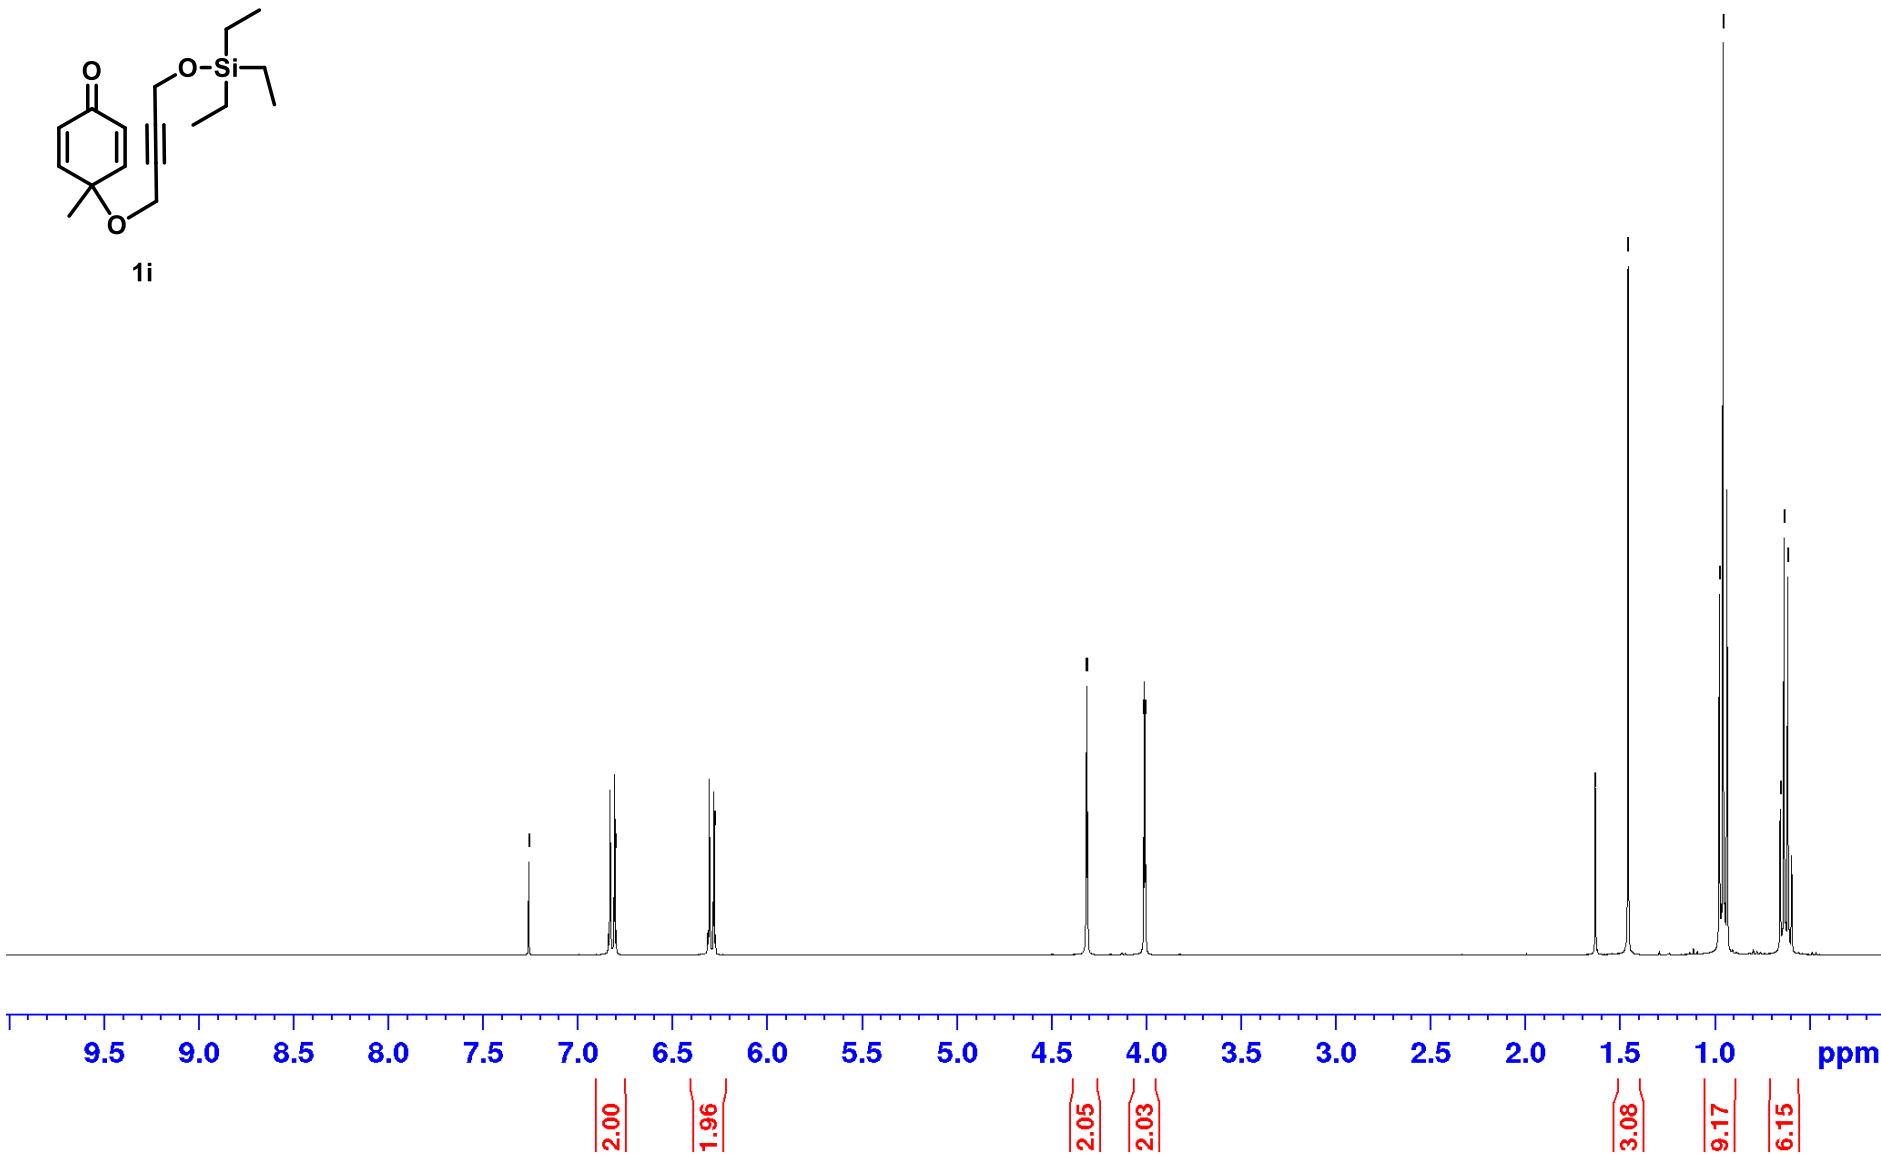

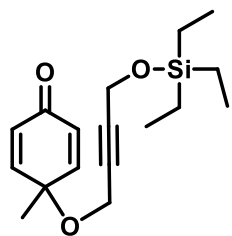

1i

— 184.78

— 150.71

— 130.29

— 85.26

— 81.10

— 77.30

— 76.98

— 76.67

— 72.99

— 53.92

— 51.18

— 26.20

— 6.52

— 4.25

210 200 190 180 170 160 150 140 130 120 110 100 90 80 70 60 50 40 30 20 10 0 ppm



Supplementary Figure 5.  $^1\text{H}$ ,  $^{13}\text{C}$ -NMR and SFC spectra of product 3aa

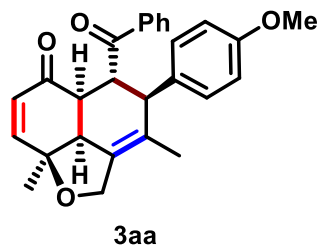

8.00  
7.98  
7.58  
7.56  
7.54  
7.46  
7.44  
7.42  
7.26  
6.89  
6.87  
6.80  
6.77  
6.60  
6.59  
6.57  
6.57  
5.99  
5.97

4.88  
4.59  
4.56  
4.55  
4.35  
4.32

3.80  
3.78

2.95  
2.94  
2.93  
2.76

1.60  
1.57  
1.45  
1.39  
1.39

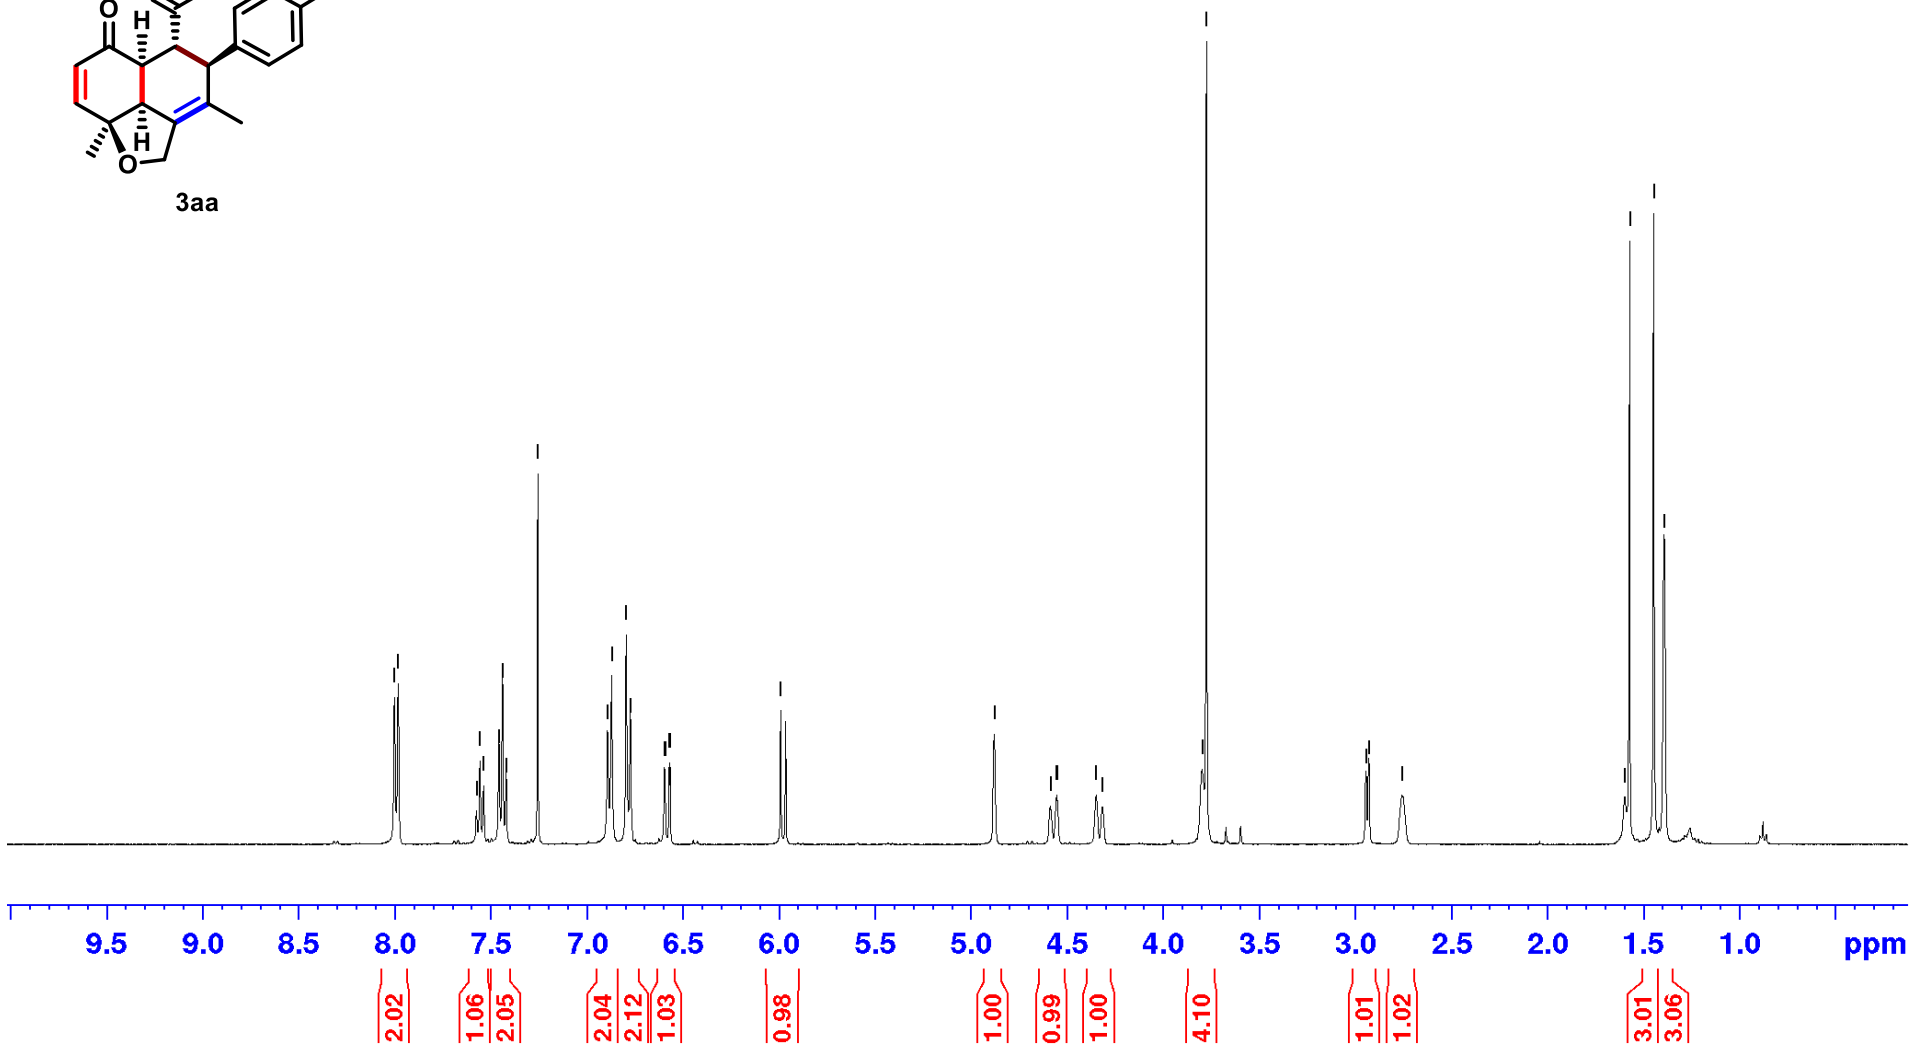

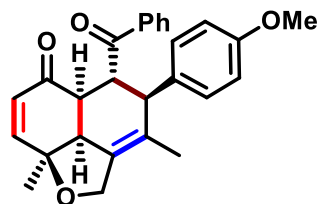

3aa

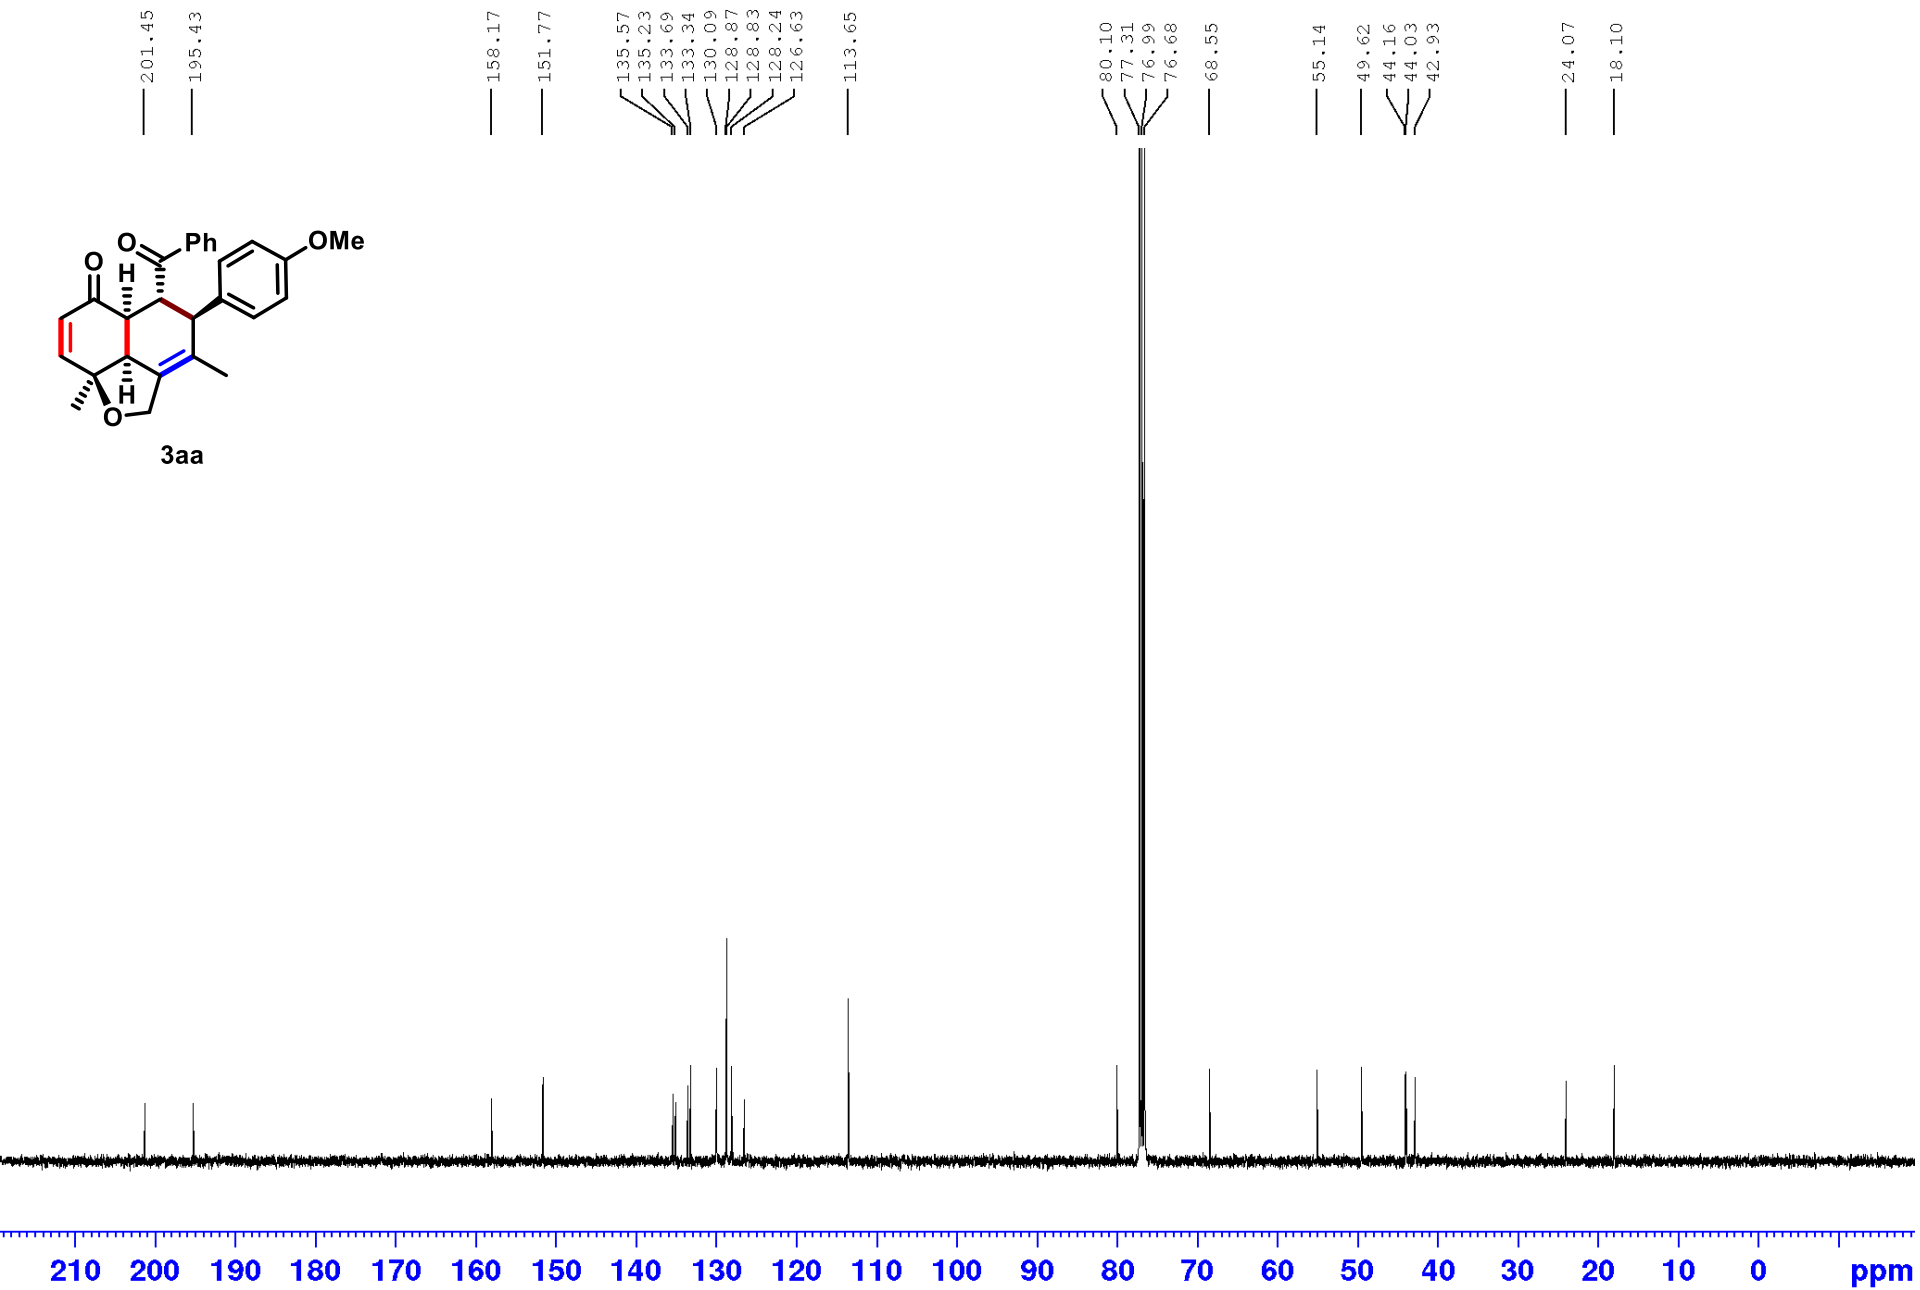

**Chiral Separation** (SFC): Chiralpak IA; Flow (CO<sub>2</sub>) = 2.4 mL/min; Flow (isopropanol) = 0.6 mL/min;  
 T = 25 °C;  $\lambda$  = 250 nm; Back pressure = 15 Mpa

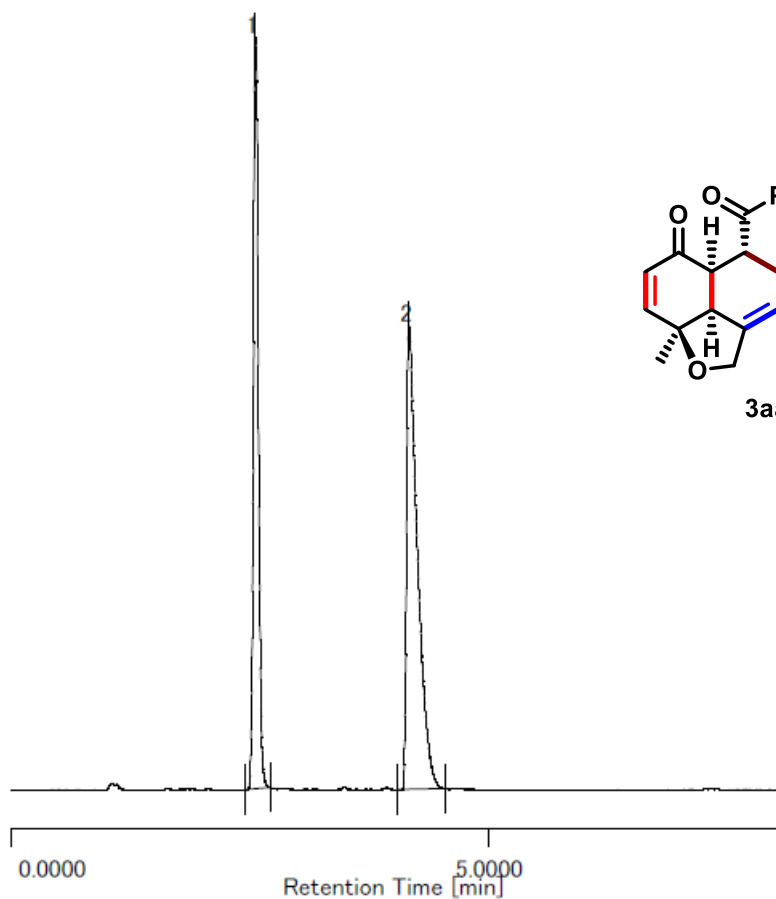

Chromatogram R-551

Name

| # | CH | tR     | Area     | Height  | Area%  |
|---|----|--------|----------|---------|--------|
| 1 | 10 | 2.5583 | 9164659  | 2561898 | 42.586 |
| 2 | 10 | 4.1600 | 12355542 | 1580788 | 57.414 |

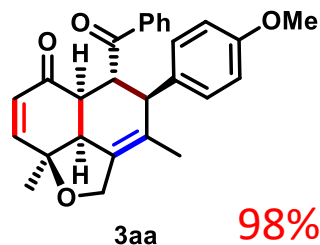

98% ee

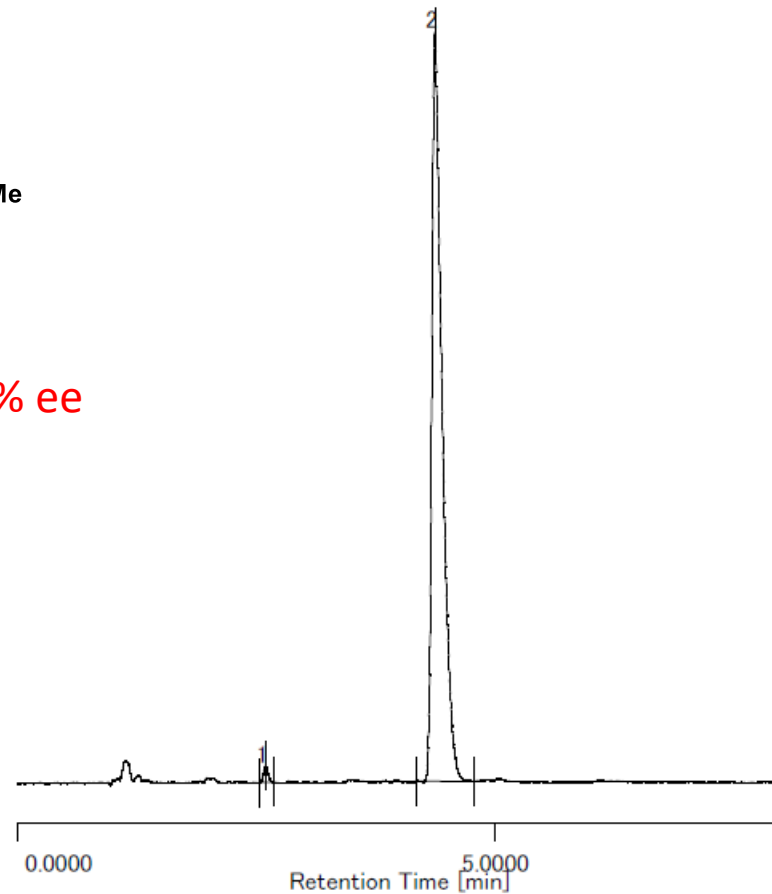

Chromatogram R-651

Name

| # | CH | tR     | Area    | Height | Area%  |
|---|----|--------|---------|--------|--------|
| 1 | 10 | 2.5967 | 58151   | 17411  | 0.998  |
| 2 | 10 | 4.3633 | 5768852 | 785440 | 99.002 |

Supplementary Figure 6.  $^1\text{H}$ ,  $^{13}\text{C}$ -NMR and SFC spectra of product 3ab

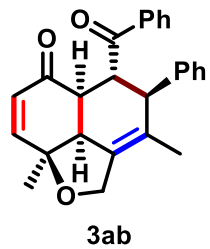

8.00  
7.98  
7.57  
7.55  
7.53  
7.45  
7.43  
7.41  
7.27  
7.25  
7.25  
7.23  
7.21  
7.19  
7.18  
7.17  
6.98  
6.97  
6.60  
6.59  
6.57  
6.57  
5.99  
5.96  
4.90  
4.59  
4.57  
4.56  
4.36  
4.33  
3.86  
2.95  
2.94  
2.76  
1.62  
1.44  
1.41

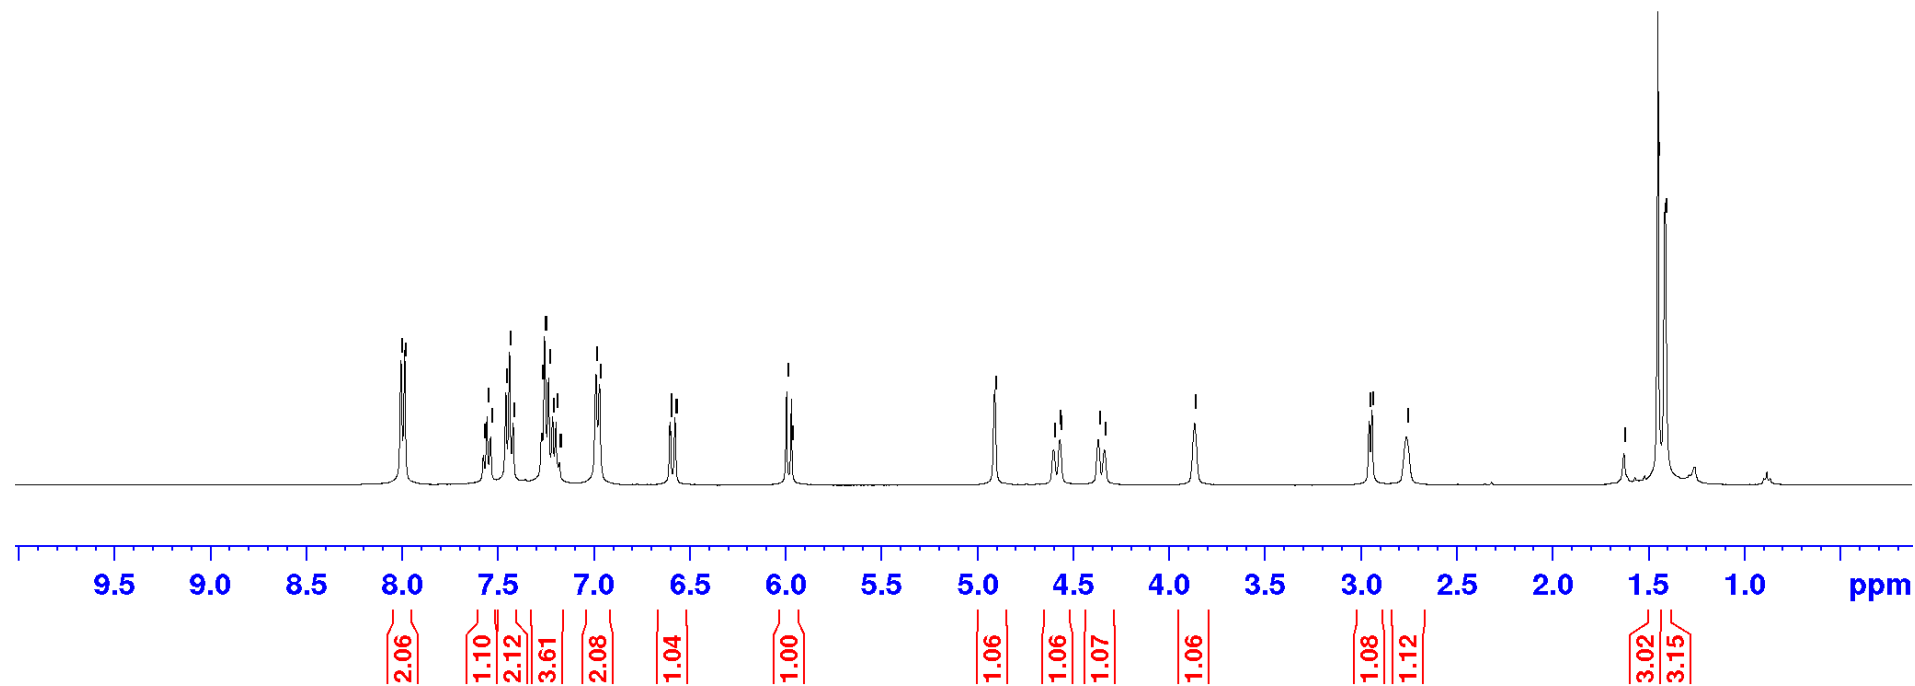

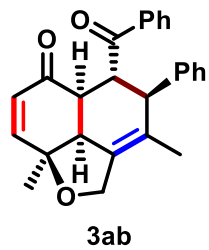

— 201.27  
— 195.23

— 151.74  
— 143.48  
135.17  
133.93  
133.34  
129.14  
128.85  
128.83  
128.29  
128.24  
126.58  
126.29

80.08  
77.31  
77.00  
76.68  
— 68.52

— 49.49  
44.91  
44.05  
42.92

— 24.07  
— 18.11

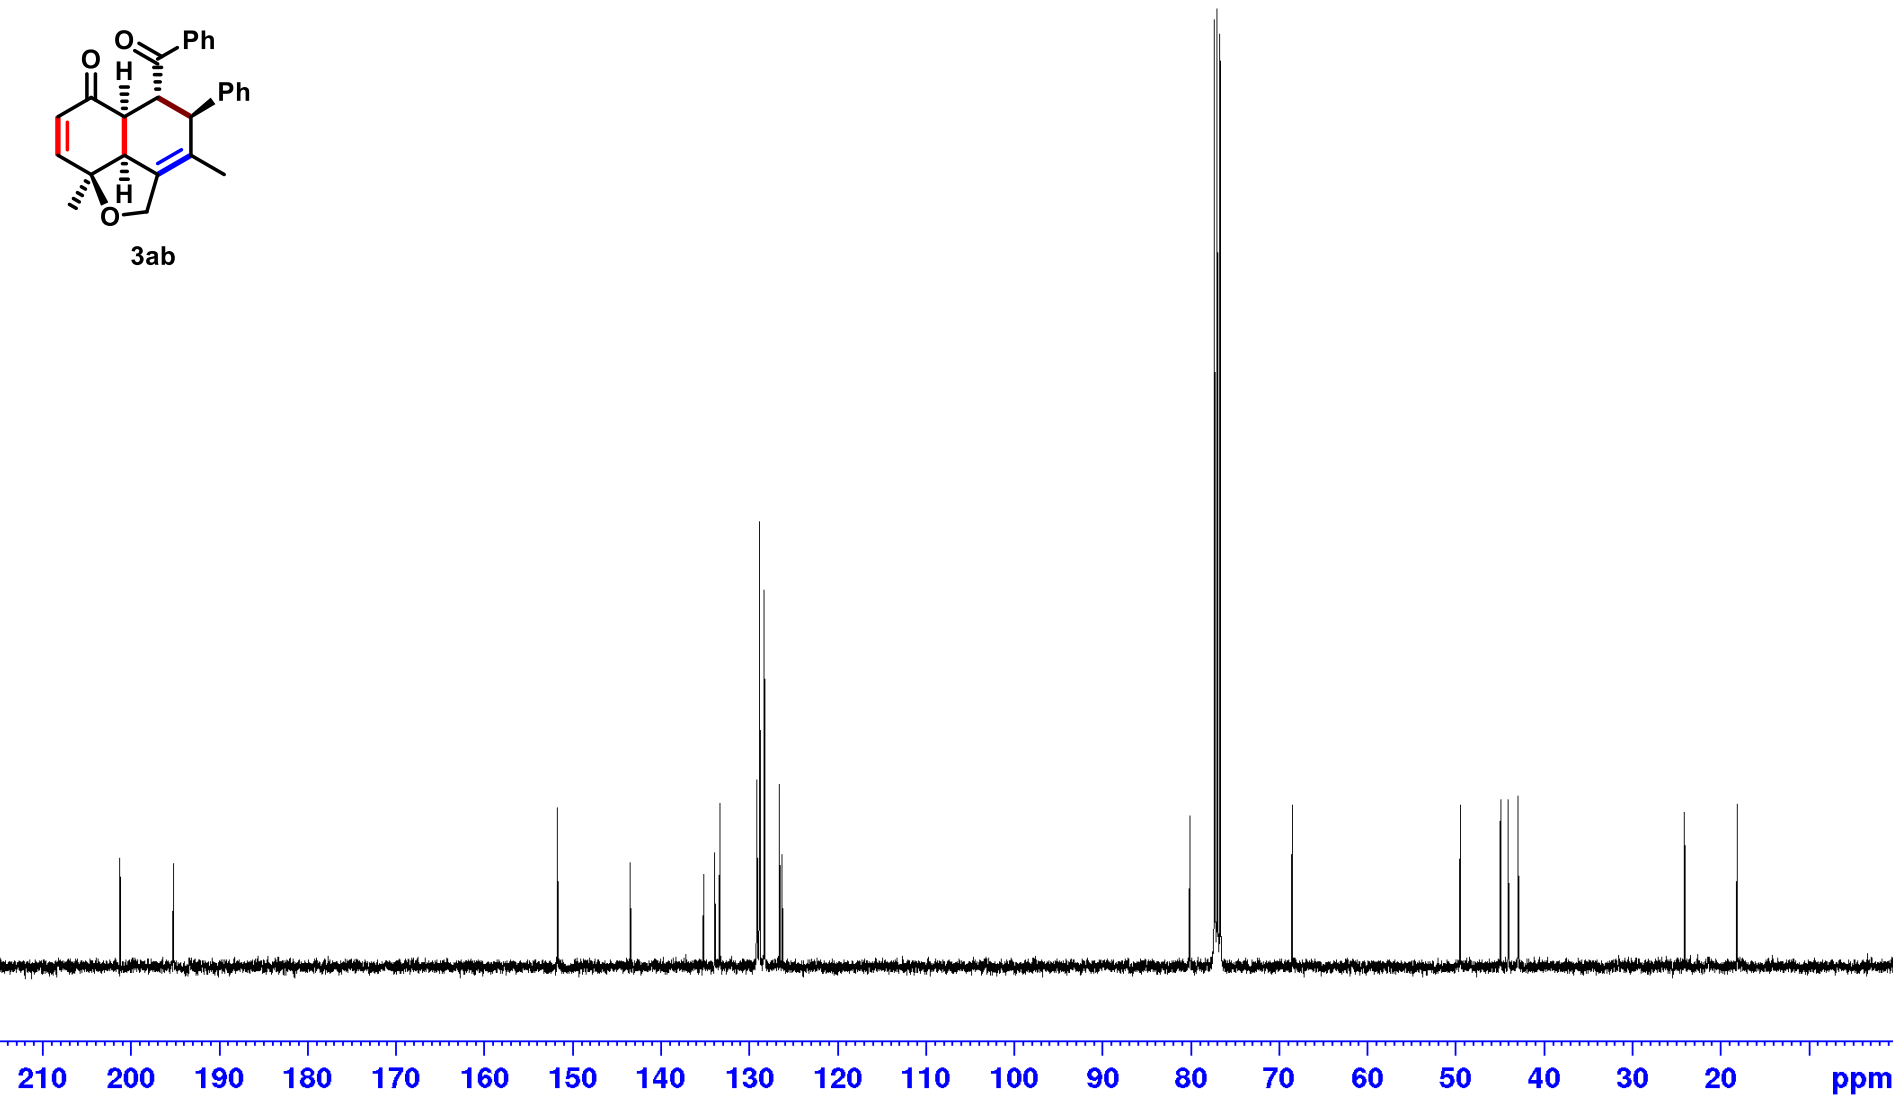

**Chiral Separation (SFC):** Chiralpak IA; Flow (CO<sub>2</sub>) = 3.0 mL/min; Flow (isopropanol) = 0.3 mL/min;  
 T = 25 °C; λ = 250 nm; Back pressure = 15 Mpa

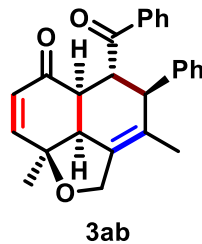

98% ee

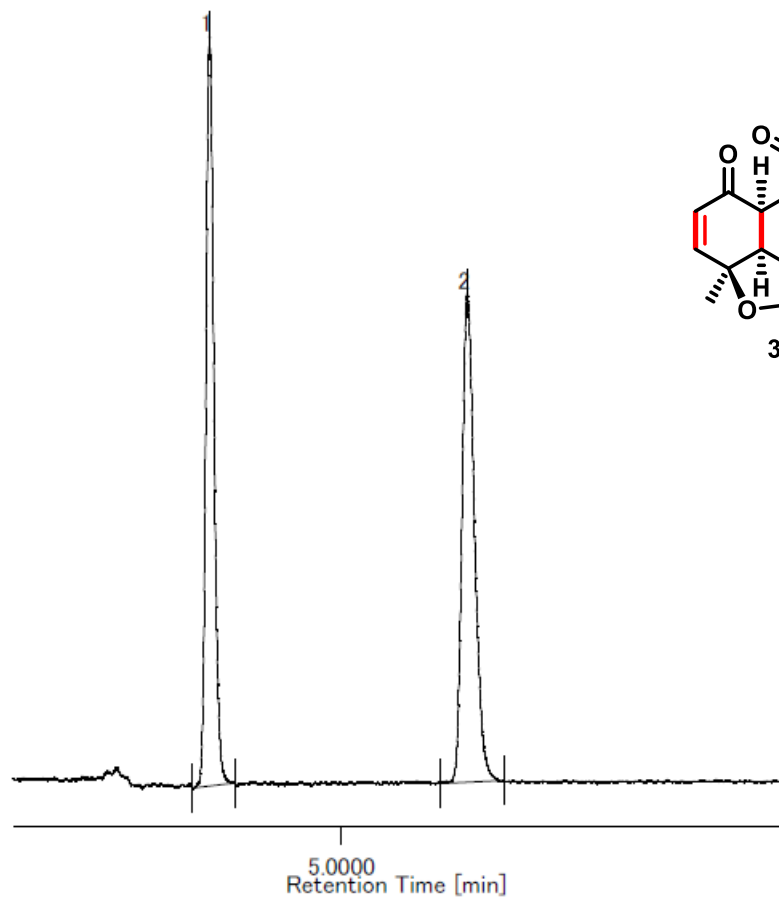

Chromatogram R-680

Name

| # | CH | tR     | Area    | Height | Area%  |
|---|----|--------|---------|--------|--------|
| 1 | 9  | 3.7917 | 1830750 | 361876 | 49.474 |
| 2 | 9  | 6.1450 | 1869713 | 235883 | 50.526 |

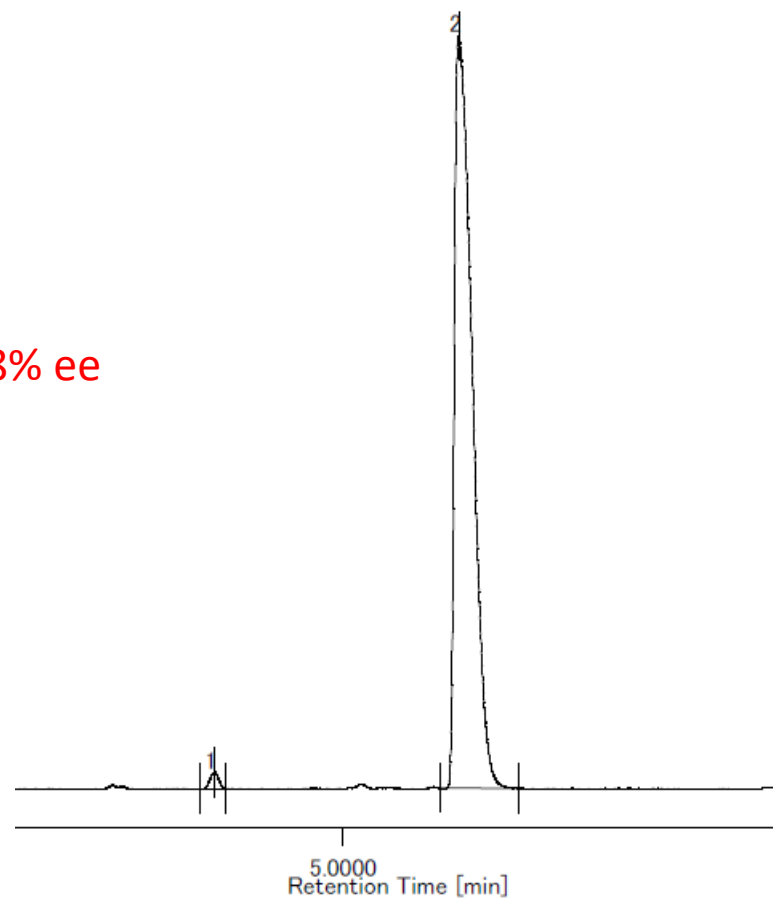

Chromatogram R-678-chalcone

Name

| # | CH | tR     | Area     | Height  | Area%  |
|---|----|--------|----------|---------|--------|
| 1 | 9  | 3.8200 | 174880   | 31805   | 1.051  |
| 2 | 9  | 6.0533 | 16457123 | 1476173 | 98.949 |

Supplementary Figure 7.  $^1\text{H}$ ,  $^{13}\text{C}$ -NMR and SFC spectra of product 3ac

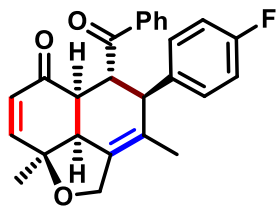

3ac

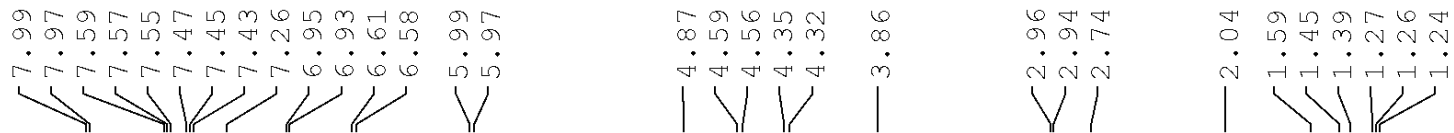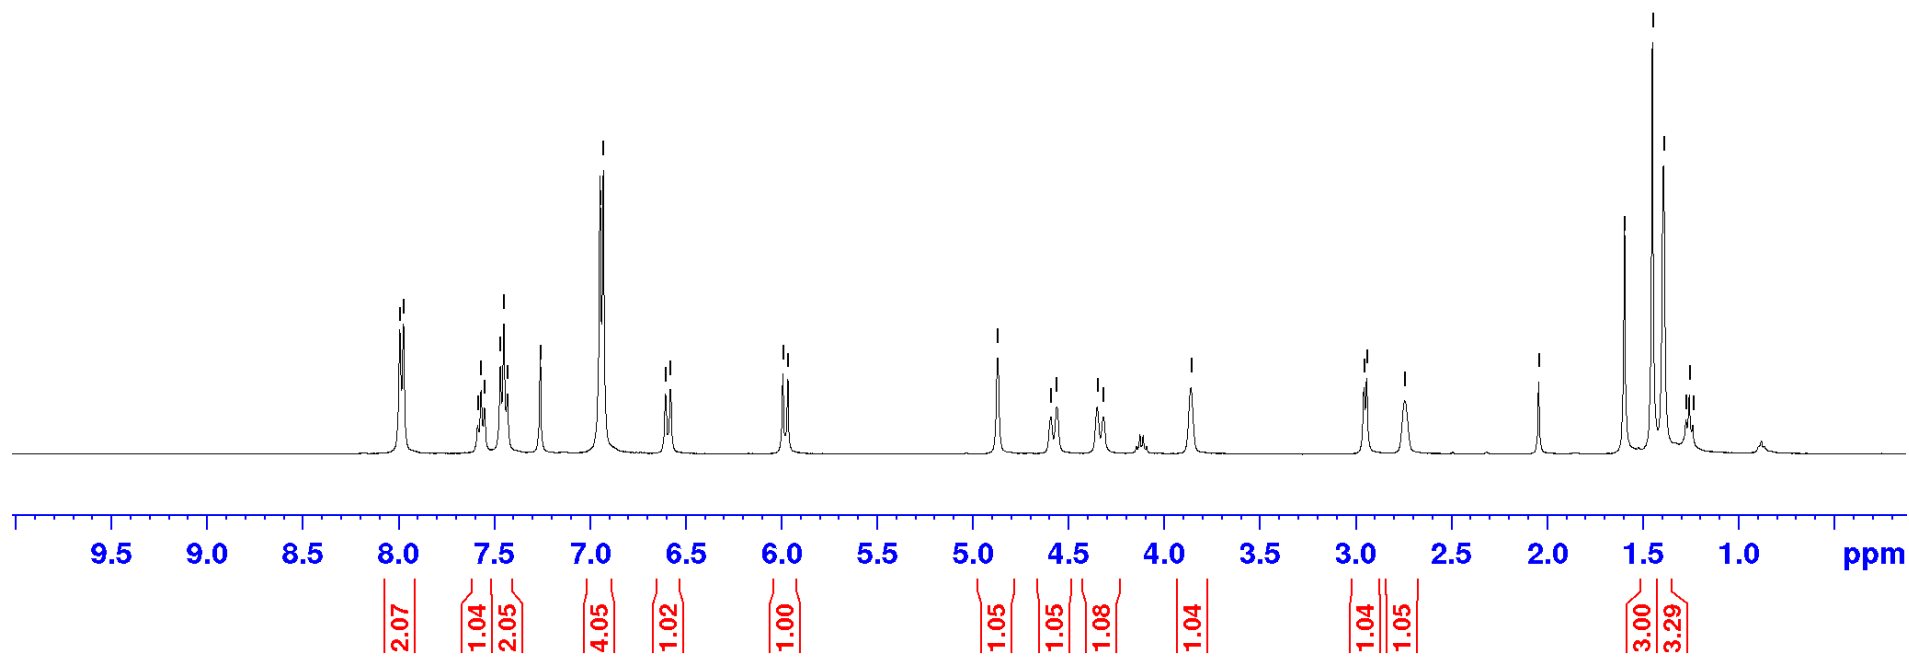

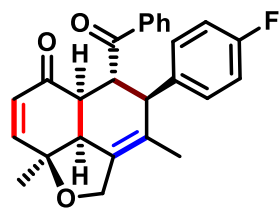

3ac

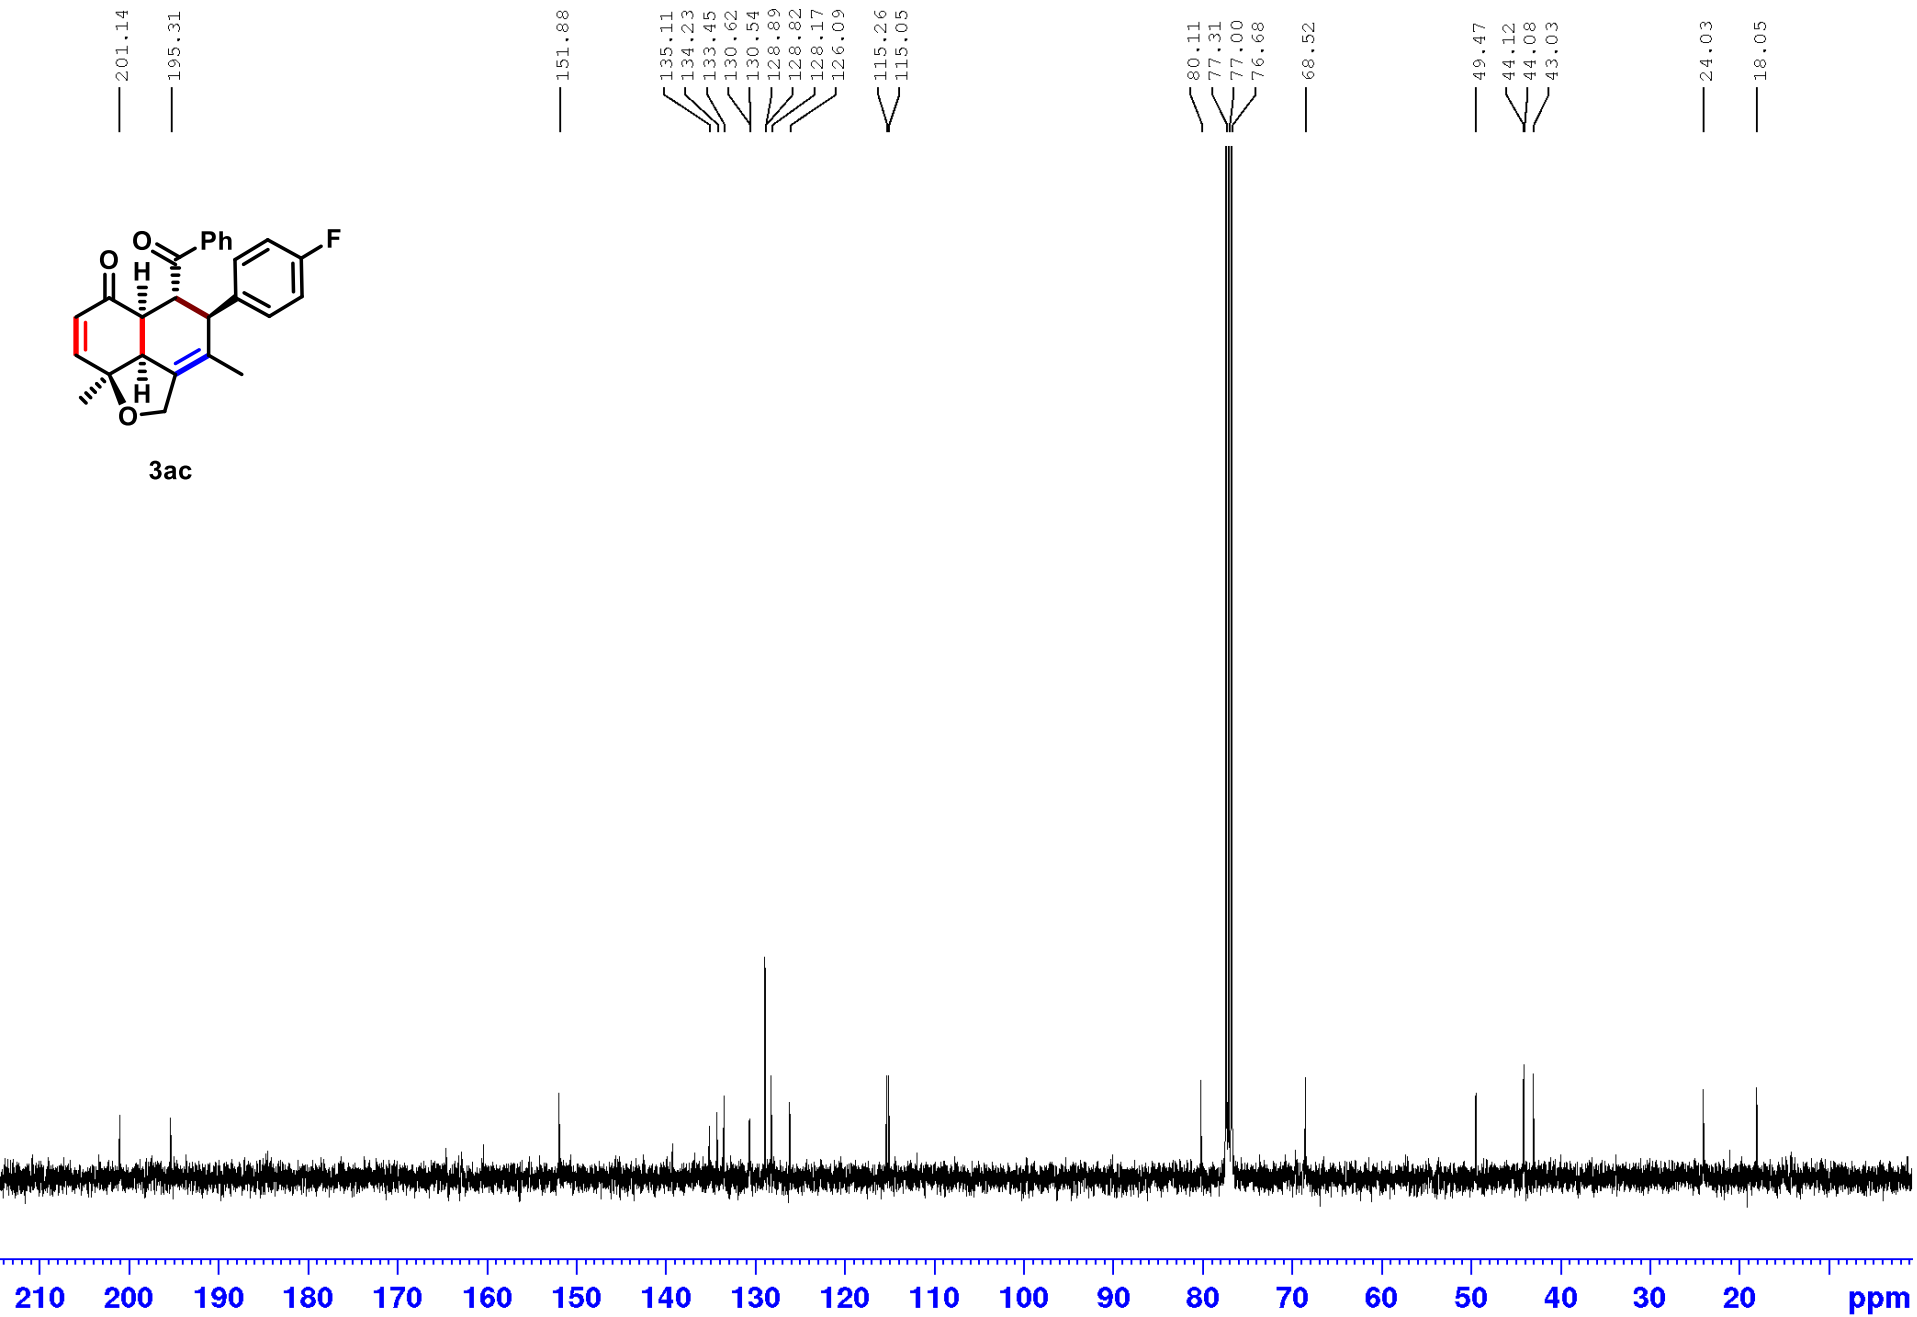



**Chiral Separation** (SFC): Chiralpak IA; Flow (CO<sub>2</sub>) = 3.0 mL/min; Flow (isopropanol) = 0.3 mL/min;  
 T = 25 °C; λ = 250 nm; Back pressure = 15 Mpa

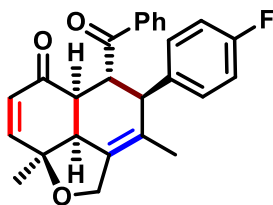

3ac 98% ee

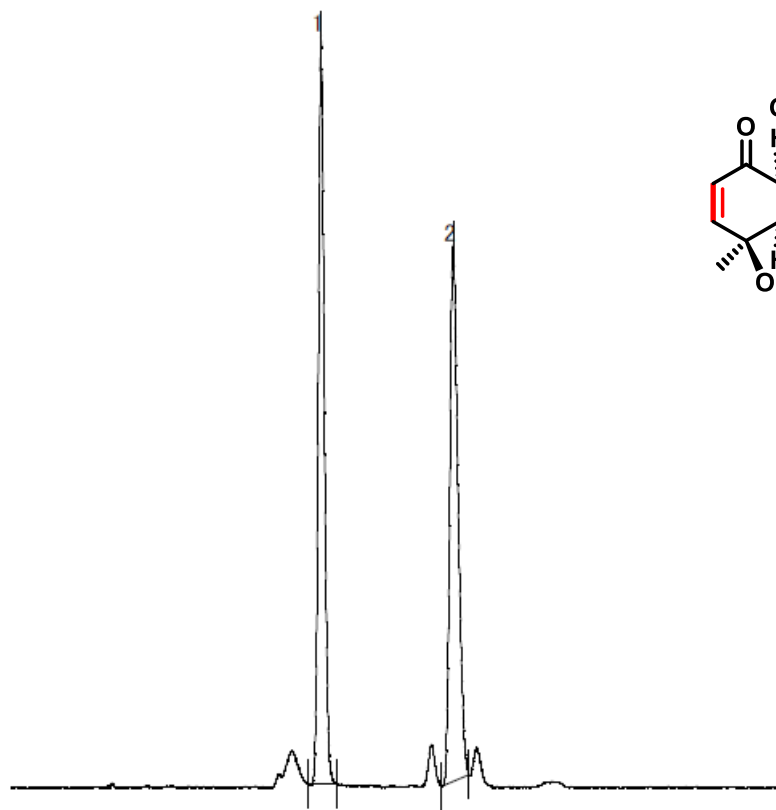

0.0000 Retention Time [min] 5.0000

Chromatogram R-681

Name

| # | CH | tR     | Area    | Height | Area%  |
|---|----|--------|---------|--------|--------|
| 1 | 10 | 3.2367 | 3947525 | 915848 | 50.389 |
| 2 | 10 | 4.6133 | 3886567 | 655119 | 49.611 |

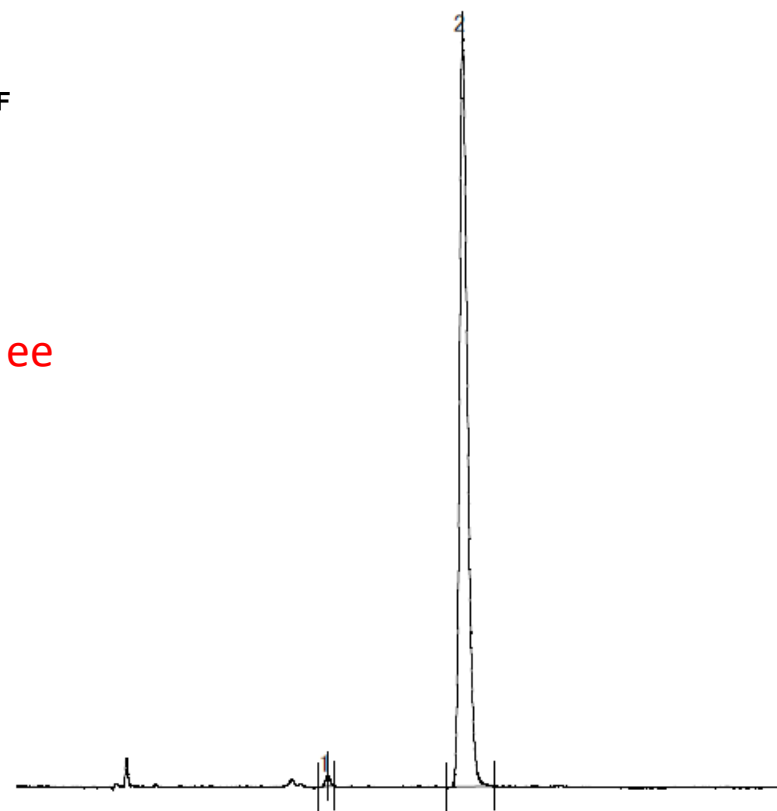

0.0000 Retention Time [min] 5.0000

Chromatogram R-677-p-F-chalcone

Name

| # | CH | tR     | Area    | Height | Area%  |
|---|----|--------|---------|--------|--------|
| 1 | 10 | 3.2517 | 41349   | 11962  | 0.878  |
| 2 | 10 | 4.6583 | 4666885 | 813530 | 99.122 |

Supplementary Figure 8.  $^1\text{H}$ ,  $^{13}\text{C}$ -NMR and SFC spectra of product 3ad

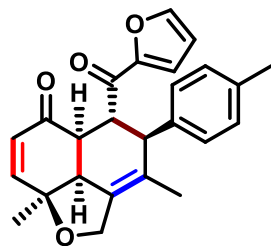

3ad

7.59  
7.59  
7.26  
7.23  
7.22  
7.07  
7.05  
6.88  
6.86  
6.60  
6.59  
6.57  
6.57  
6.51  
6.50  
6.50  
6.49  
5.98  
5.96  
4.62  
4.61  
4.61  
4.61  
4.59  
4.59  
4.58  
4.56  
4.55  
4.55  
4.35  
4.32  
3.75  
2.95  
2.94  
2.93  
2.93  
2.88  
2.30  
1.49  
1.38  
1.38

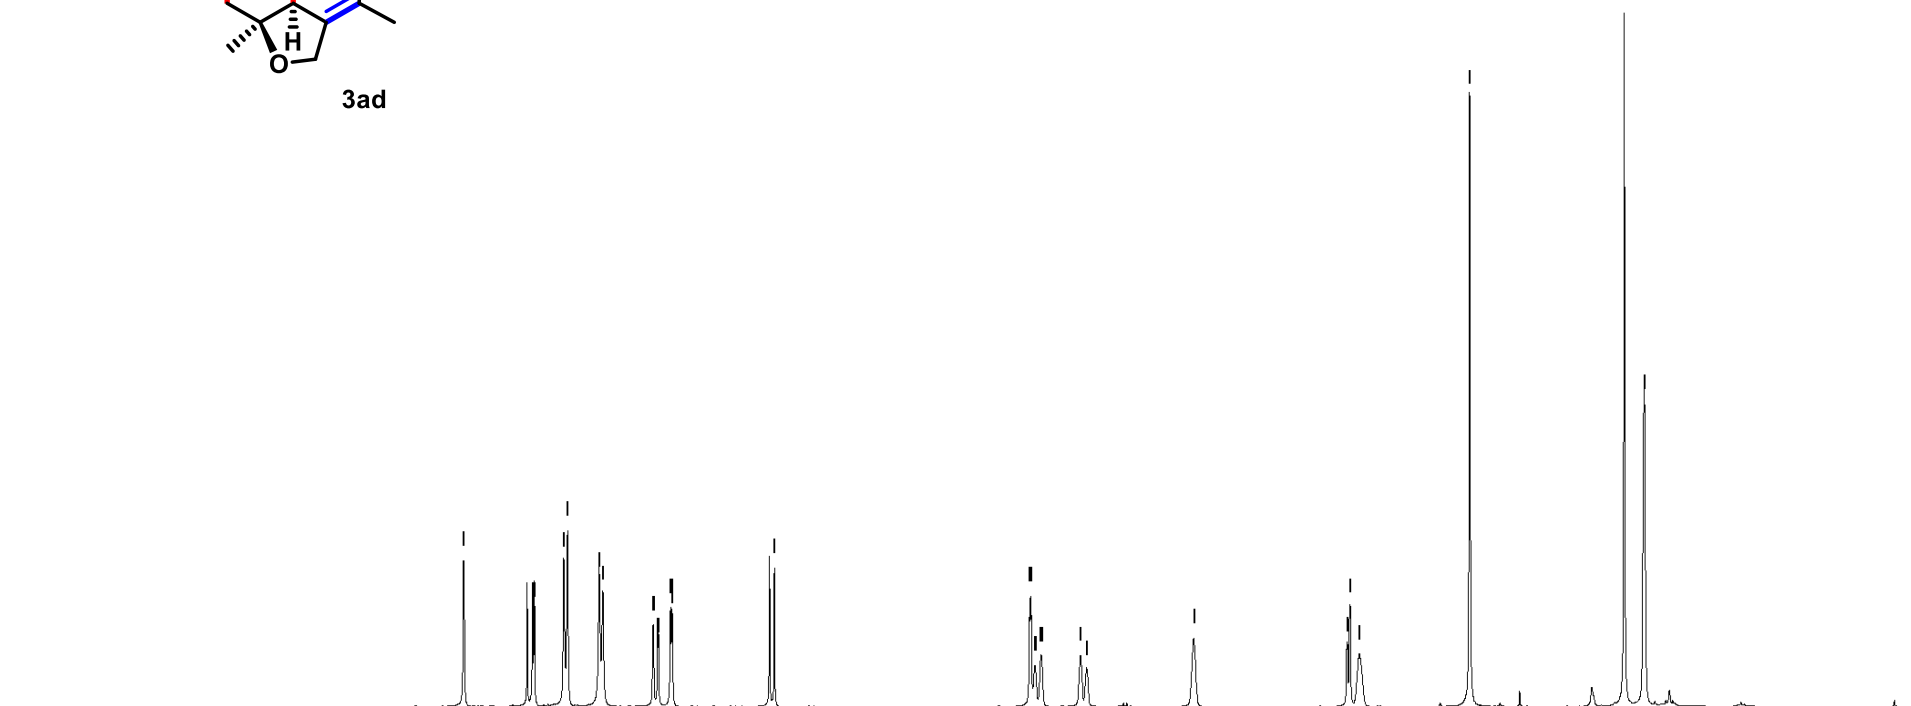

9.5 9.0 8.5 8.0 7.5 7.0 6.5 6.0 5.5 5.0 4.5 4.0 3.5 3.0 2.5 2.0 1.5 1.0 ppm

1.00  
1.03  
2.08  
2.04  
1.05  
1.01  
1.02  
1.00  
1.08  
1.05  
1.04  
1.03  
1.06  
3.18  
3.14  
3.12

— 195.12  
— 190.23

— 151.53  
— 151.17  
— 147.03  
— 140.18  
— 136.03  
— 134.13  
— 128.94  
— 128.21  
— 126.15  
— 118.92  
— 112.27

— 80.08  
— 77.29  
— 76.97  
— 76.66  
— 68.49

— 49.93  
— 44.23  
— 44.13  
— 43.19

— 24.06  
— 21.02  
— 18.05

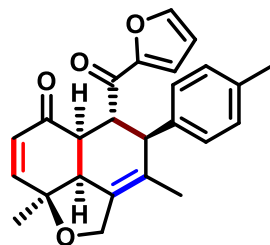

3ad

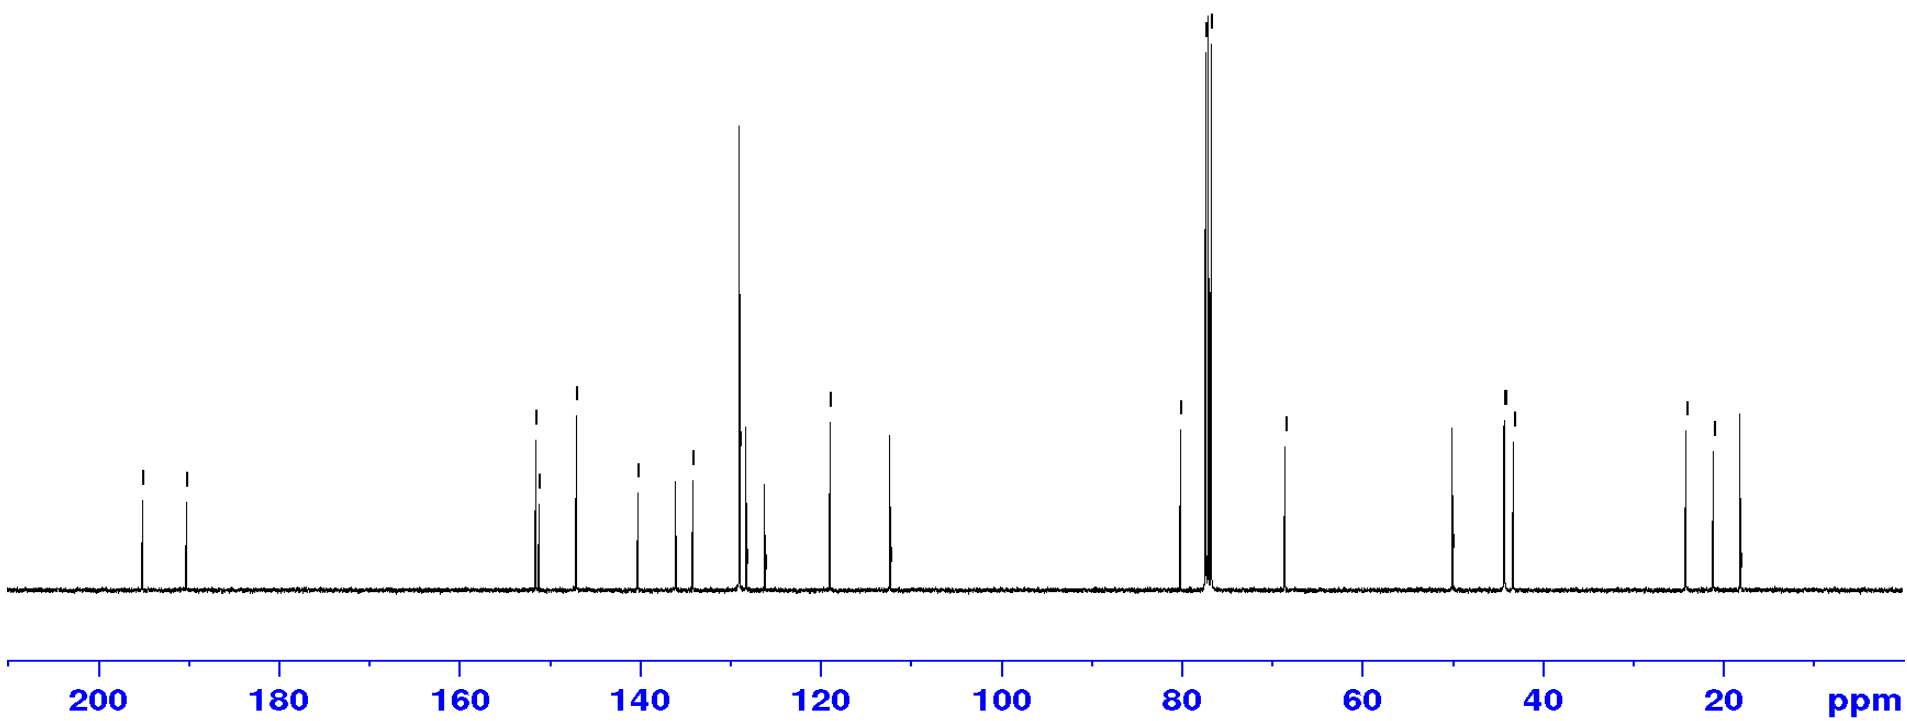

**Chiral Separation** (SFC): Chiralpak IA; Flow (CO<sub>2</sub>) = 3.0 mL/min; Flow (isopropanol) = 0.3 mL/min;  
 T = 25 °C; λ = 250 nm; Back pressure = 15 Mpa

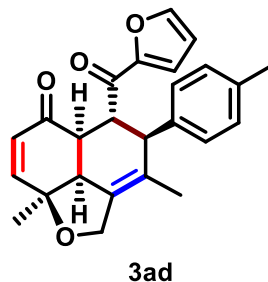

99% ee

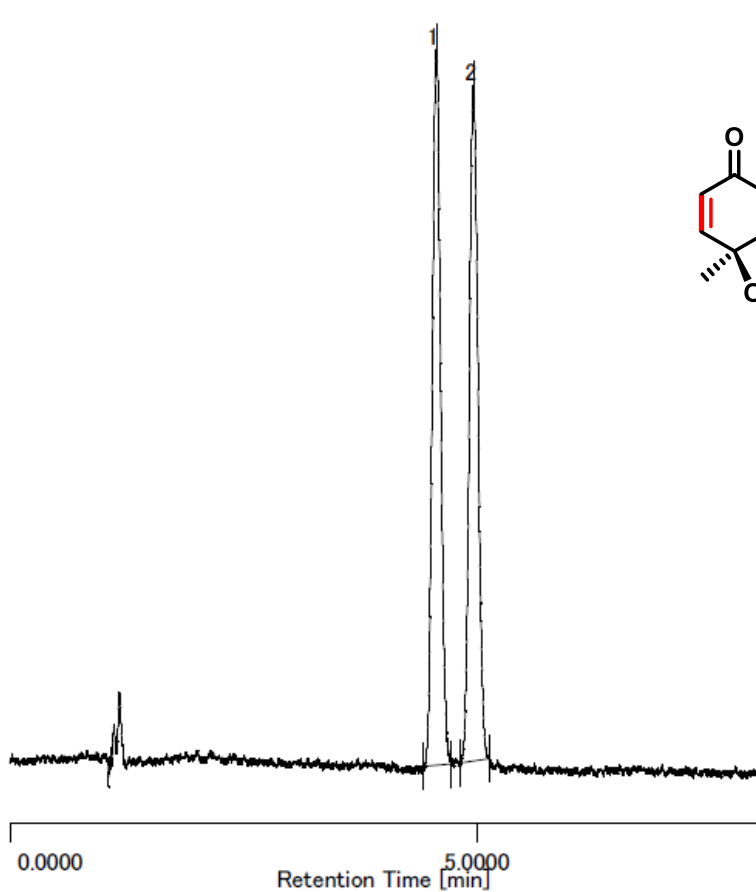

ChromatogramName R-788-rac-model-dienone+furyl-chalcone

| # | CH | tR     | Area   | Height | Area%  |
|---|----|--------|--------|--------|--------|
| 1 | 9  | 4.5633 | 583607 | 95296  | 50.462 |
| 2 | 9  | 4.9600 | 572925 | 90017  | 49.538 |

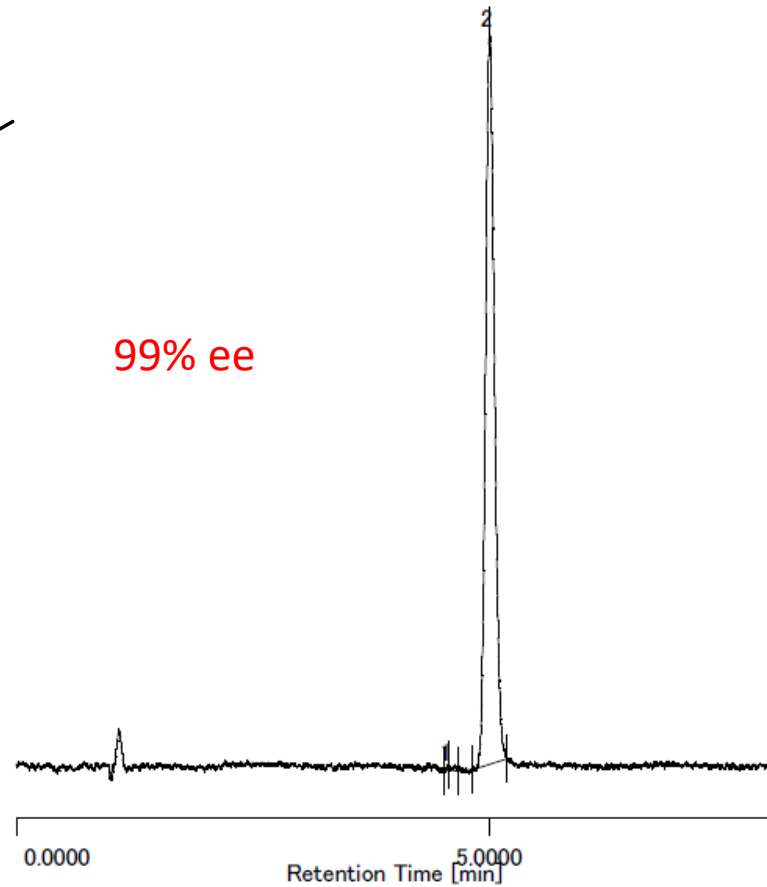

ChromatogramName R-789-chir-model-dienone+furyl-chalcone

| # | CH | tR     | Area   | Height | Area%  |
|---|----|--------|--------|--------|--------|
| 1 | 9  | 4.5717 | 4751   | 1247   | 0.507  |
| 2 | 9  | 5.0000 | 932682 | 143738 | 99.493 |

Supplementary Figure 9.  $^1\text{H}$ ,  $^{13}\text{C}$ -NMR and SFC spectra of product 3ae

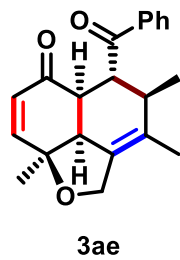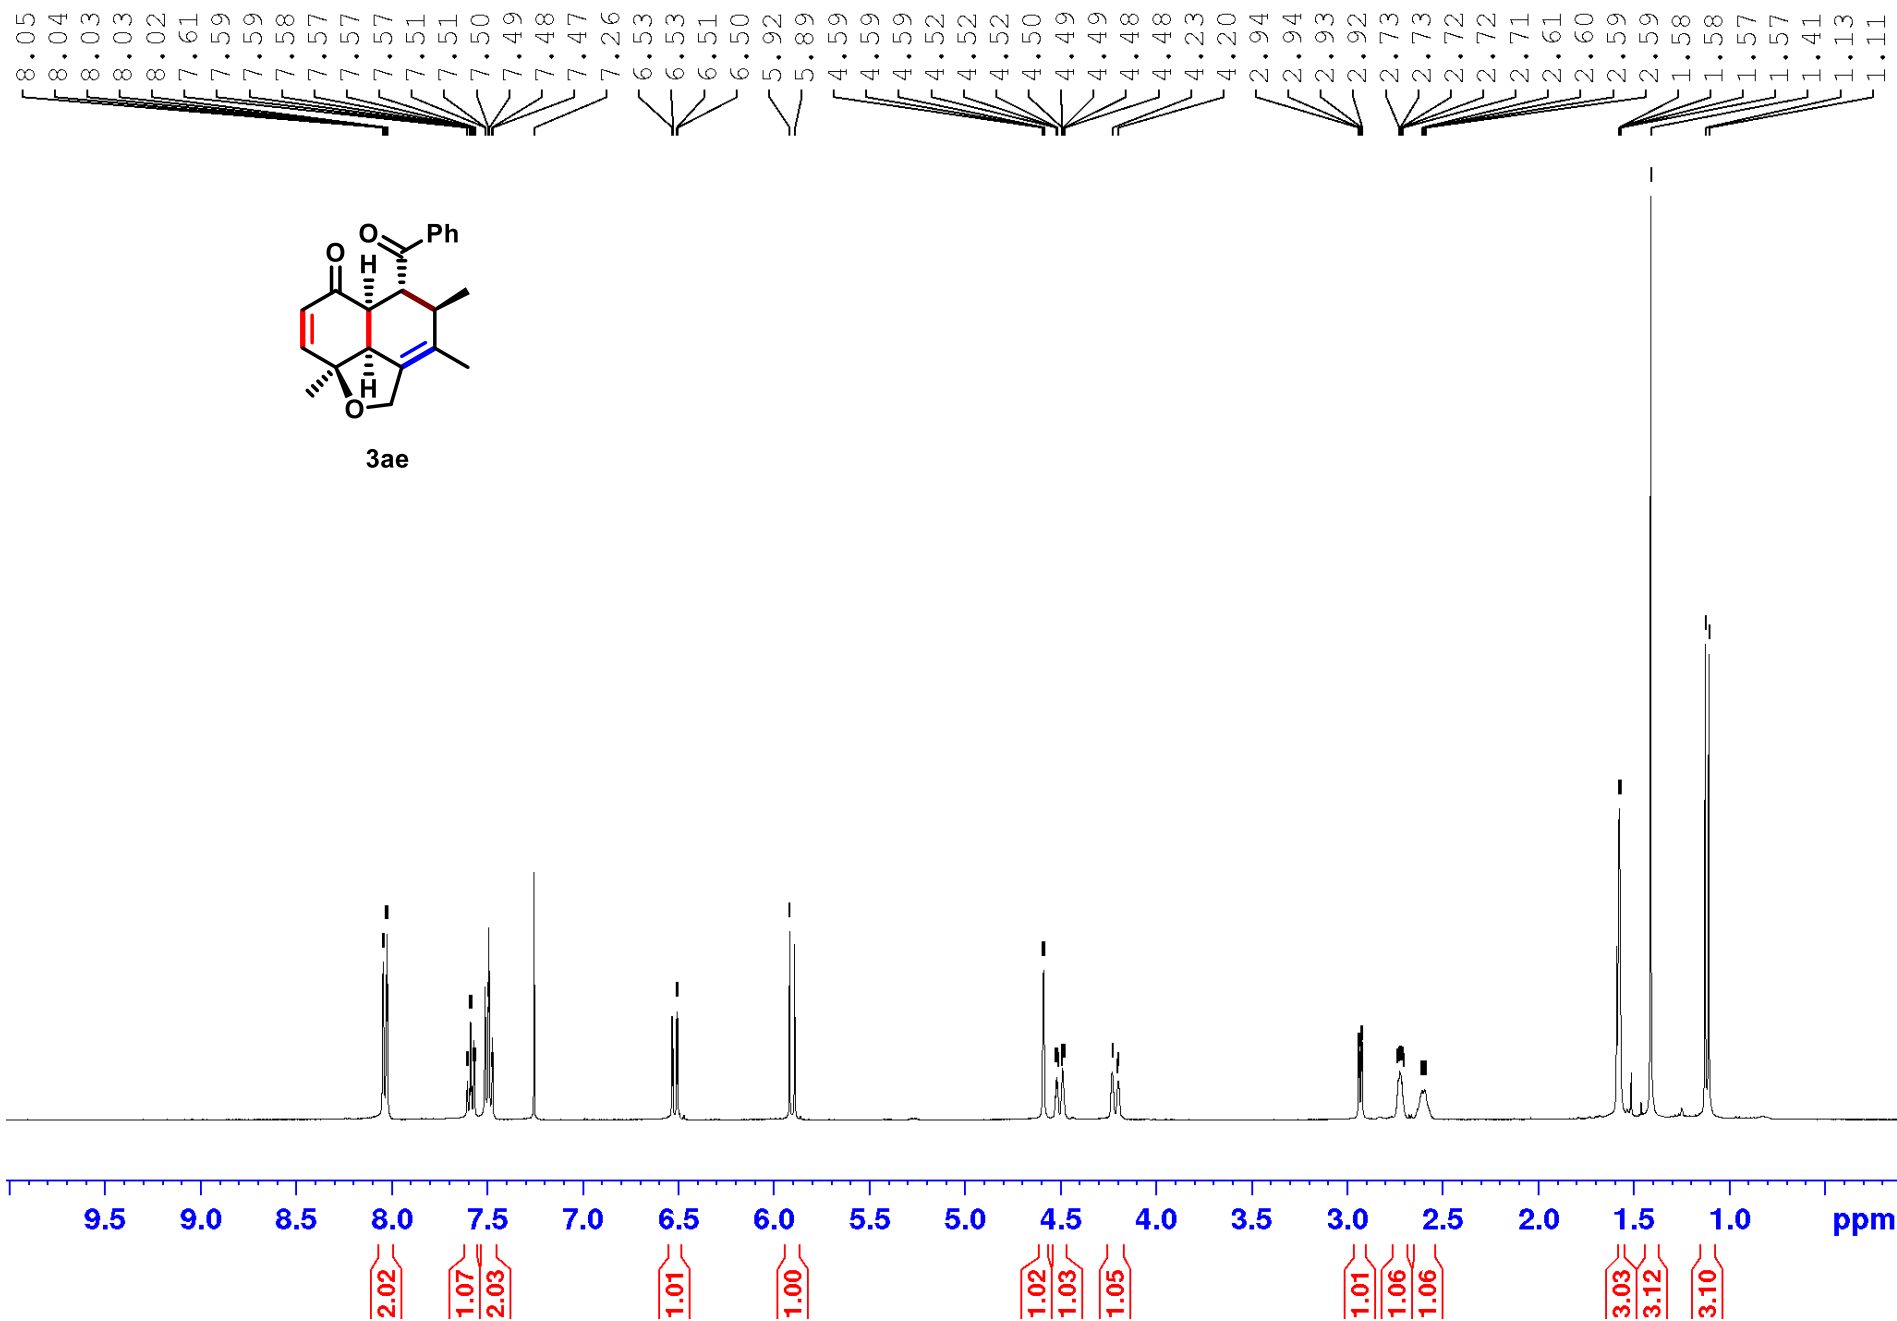

— 201.98  
— 196.32

— 151.92

135.59  
133.17  
131.20  
128.86  
128.51  
128.28  
128.01

79.97  
77.32  
77.00  
76.68  
— 68.58

— 48.18  
43.86  
42.16

— 33.40

— 24.04  
— 20.64  
— 17.19

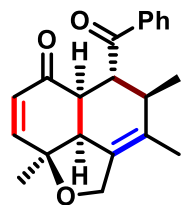

3ae

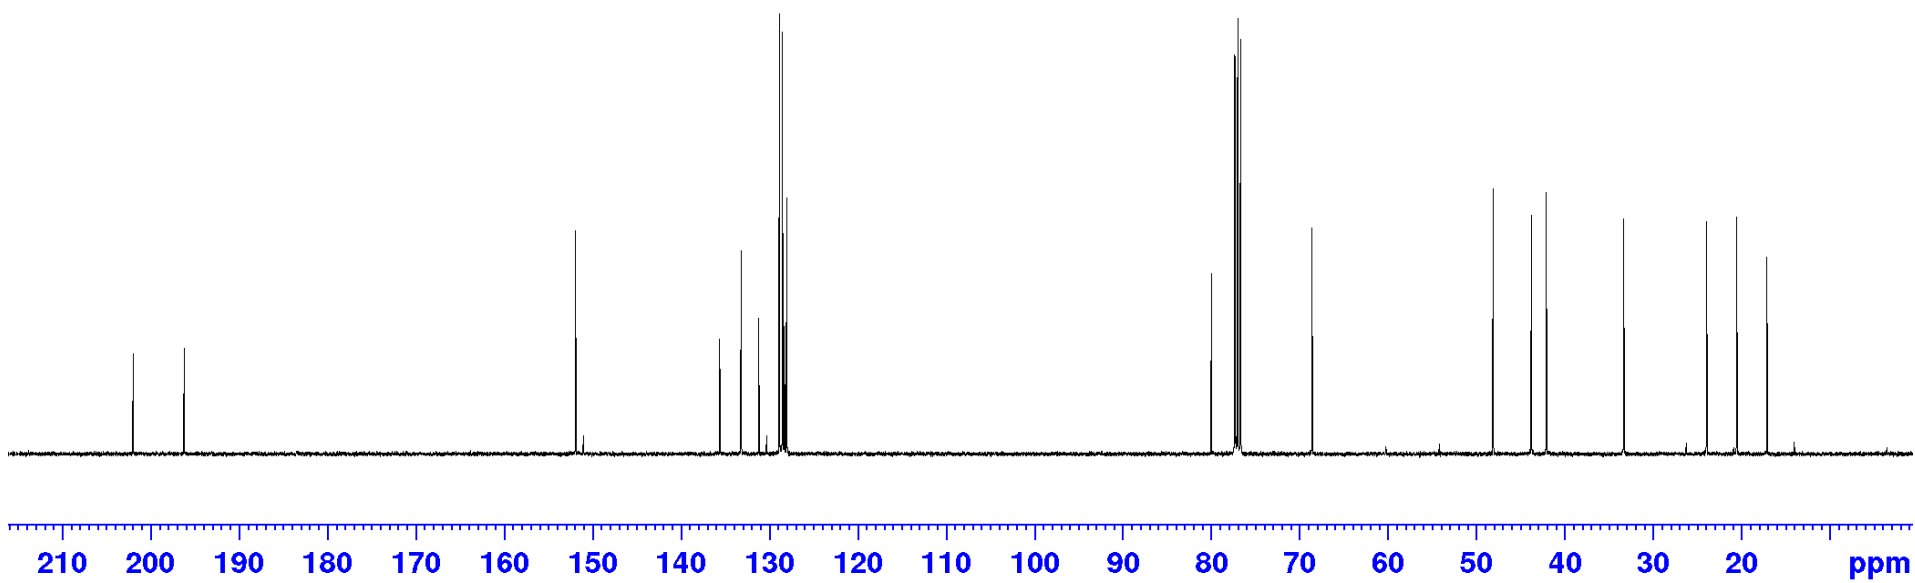

**Chiral Separation** (SFC): Chiralpak IA; Flow (CO<sub>2</sub>) = 2.4 mL/min; Flow (isopropanol) = 0.6 mL/min;  
 T = 25 °C; λ = 250 nm; Back pressure = 15 Mpa

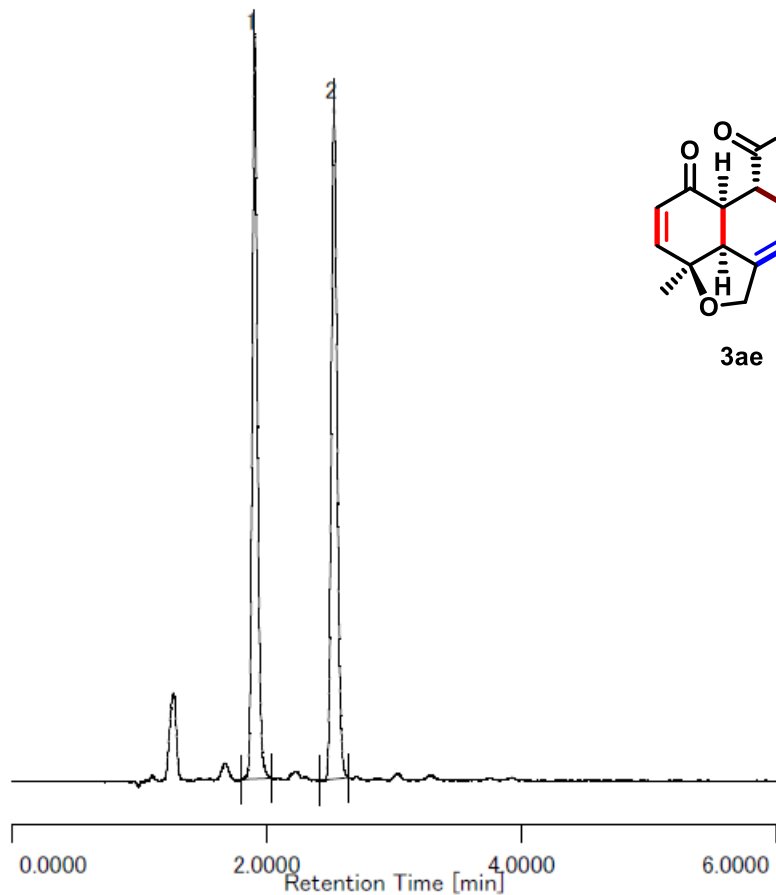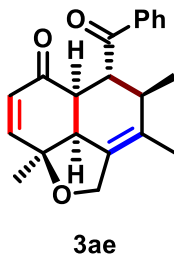

97% ee

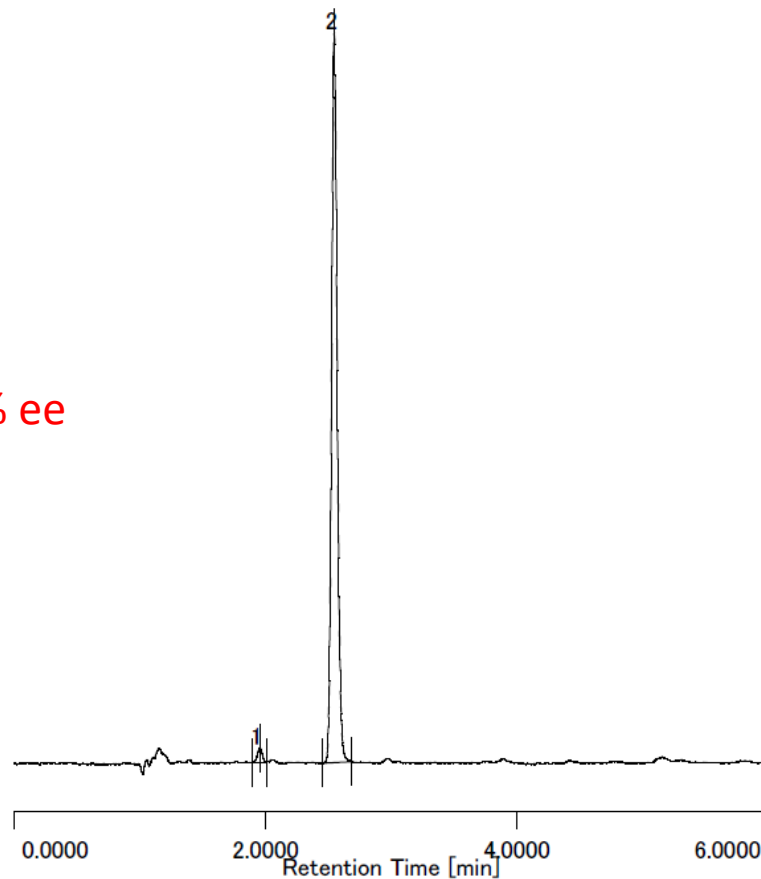

Chromatogram R-572-eri

Name

| # | CH | tR     | Area    | Height | Area%  |
|---|----|--------|---------|--------|--------|
| 1 | 9  | 1.9050 | 1858428 | 666890 | 49.443 |
| 2 | 9  | 2.5267 | 1900331 | 605206 | 50.557 |

Chromatogram R-637

Name

| # | CH | tR     | Area    | Height | Area%  |
|---|----|--------|---------|--------|--------|
| 1 | 9  | 1.9533 | 22445   | 8576   | 1.602  |
| 2 | 9  | 2.5450 | 1378261 | 444946 | 98.398 |

Supplementary Figure 10. <sup>1</sup>H and <sup>13</sup>C-NMR spectra of product 3ae'

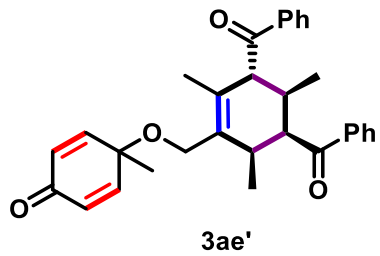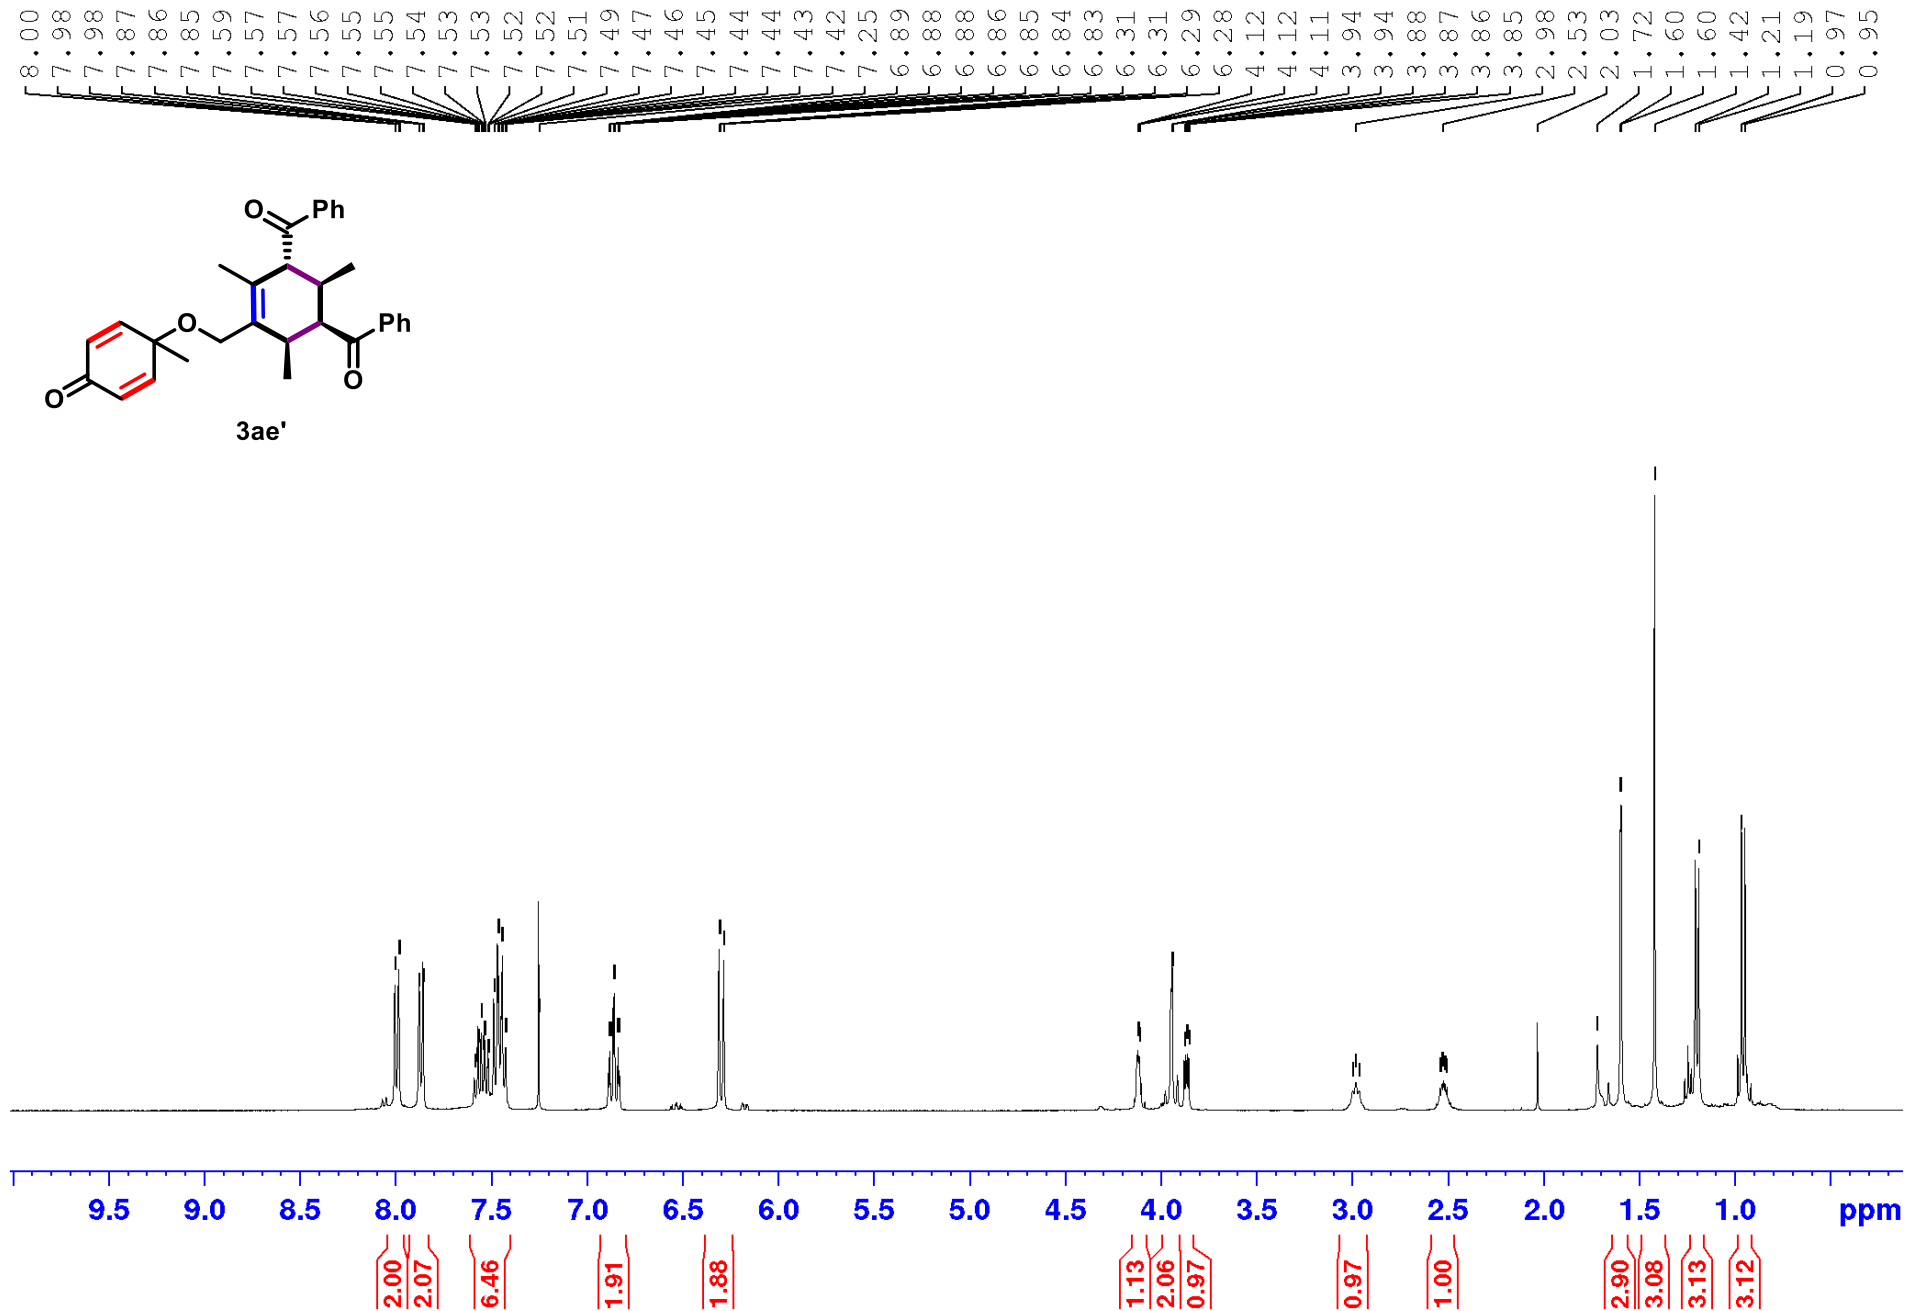



203.65  
202.48

185.32

152.37  
152.27  
138.63  
137.16  
133.49  
133.29  
132.69  
130.00  
129.77  
129.25  
128.77  
128.62  
128.41  
128.01

77.32  
77.00  
76.68  
72.50

63.46

56.04

46.26

34.41  
33.09

26.54

19.25  
18.71  
15.71

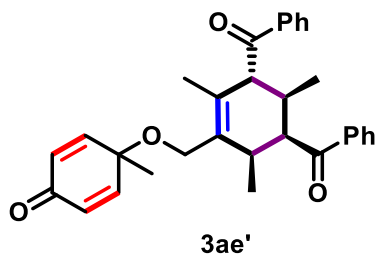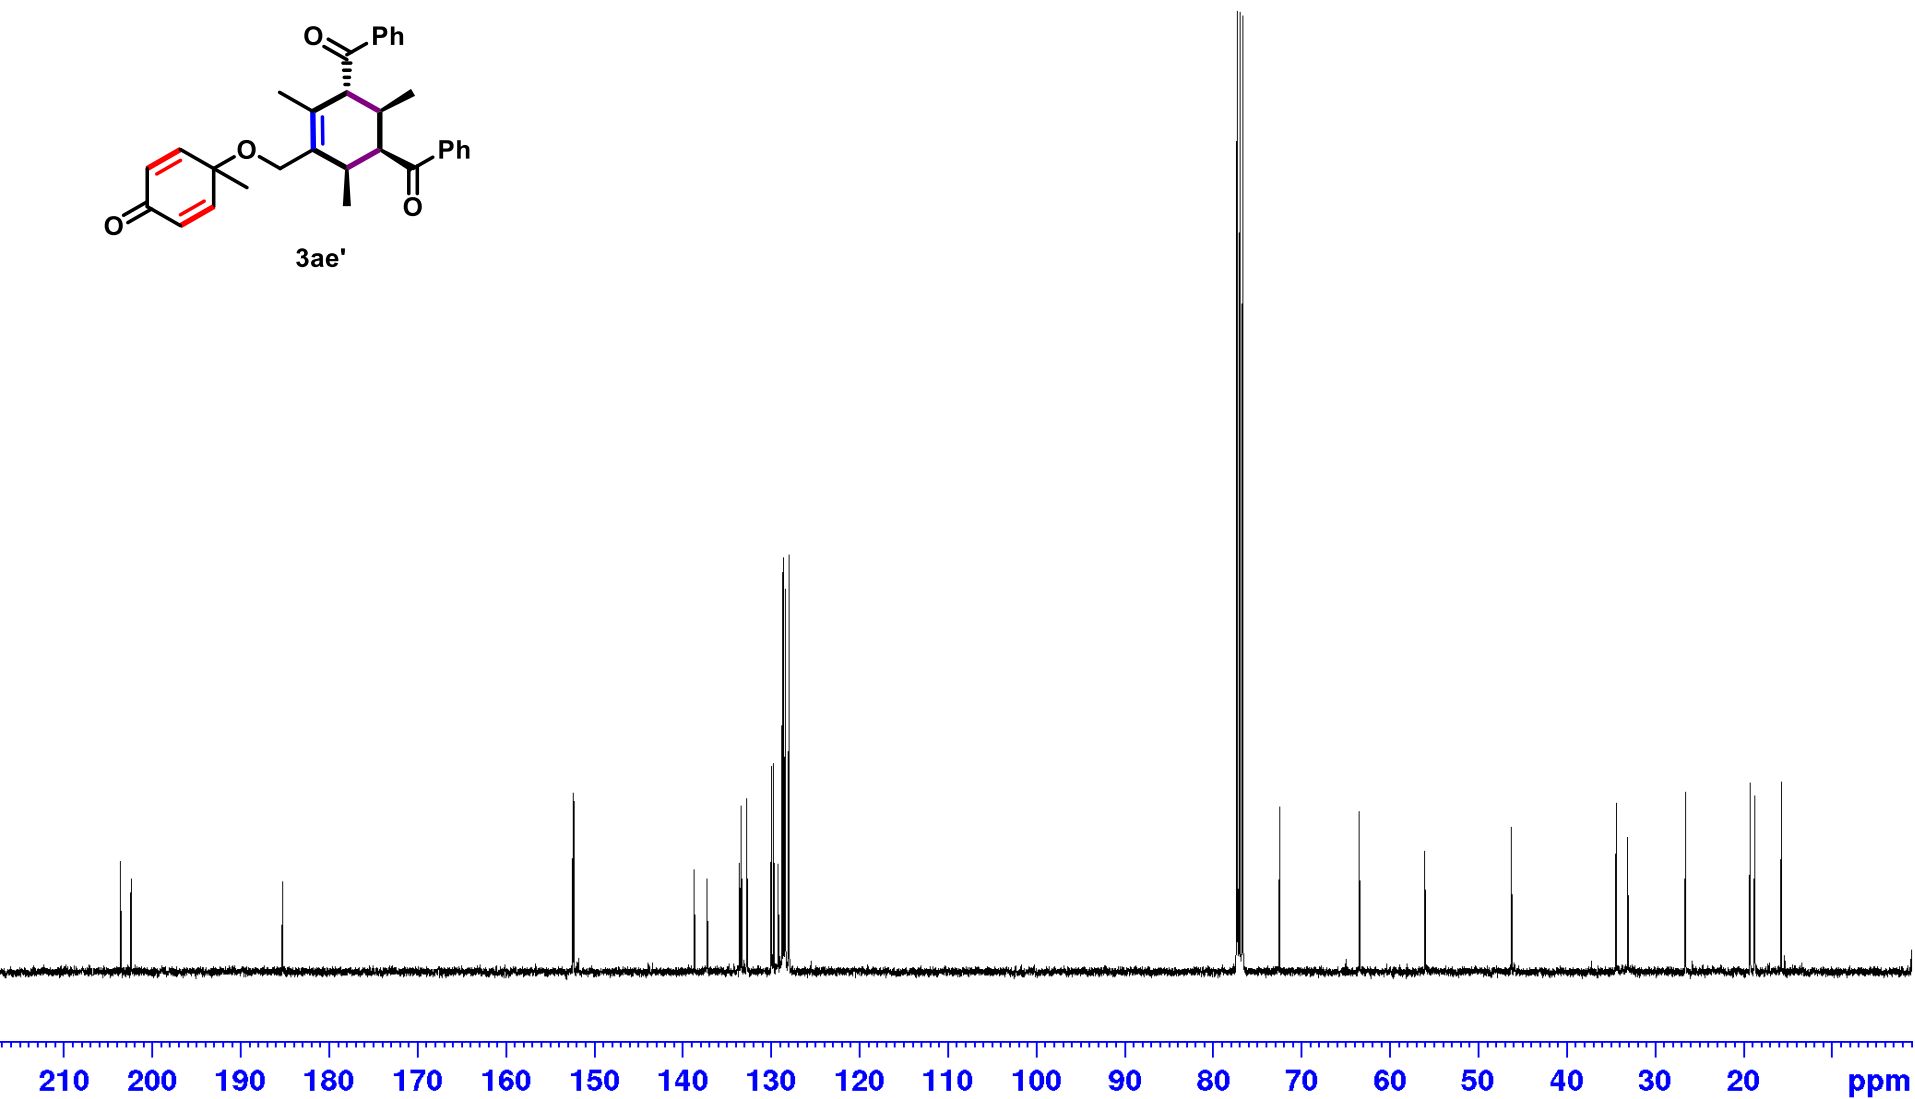

Supplementary Figure 11.  $^1\text{H}$ ,  $^{13}\text{C}$ -NMR and SFC spectra of product 3af

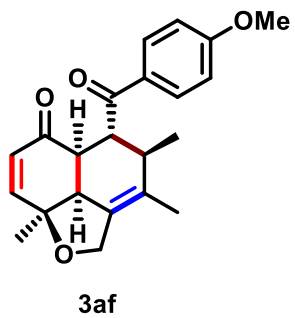

8.04  
8.02

7.26  
6.97  
6.95

6.53  
6.50

5.91  
5.89

4.54  
4.52  
4.49  
4.23  
4.19  
3.87

2.91  
2.89  
2.73  
2.59  
2.58

1.66  
1.57  
1.41  
1.11  
1.09

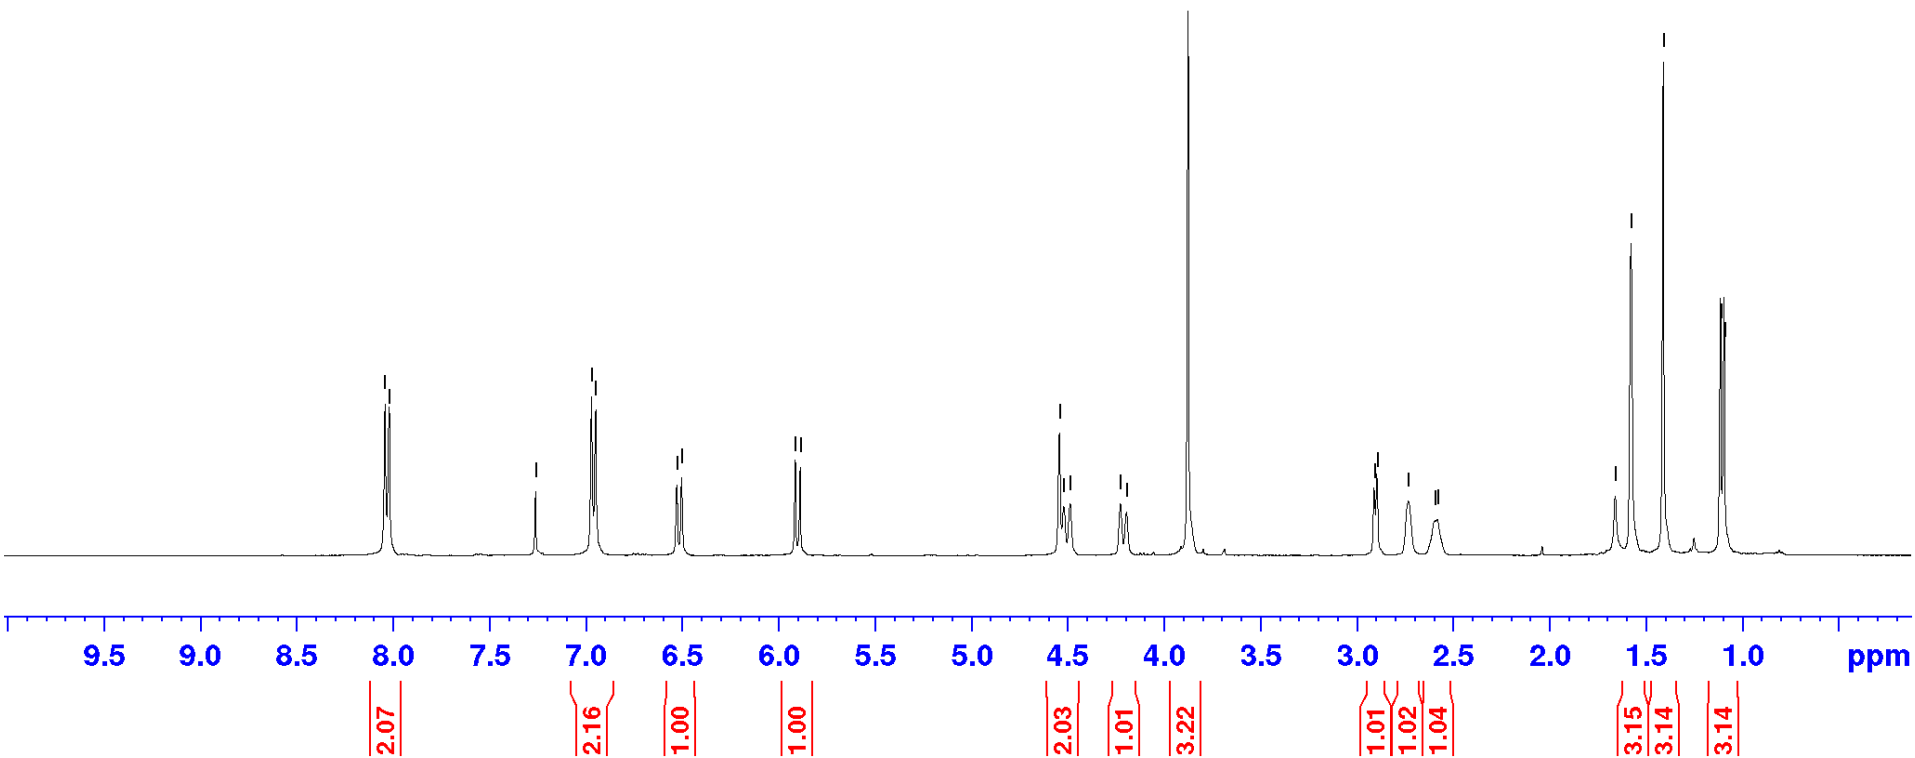

— 200.54

— 196.50

— 163.56

— 151.93

131.19

130.85

128.40

128.01

— 113.99

79.99

77.30

76.99

76.67

— 68.60

— 55.47

— 47.79

43.88

42.55

— 33.52

— 24.04

— 20.62

— 17.19

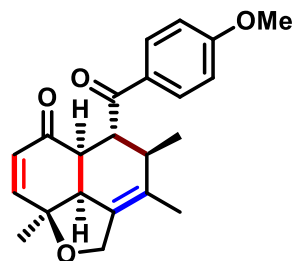

3af

200 190 180 170 160 150 140 130 120 110 100 90 80 70 60 50 40 30 20 ppm

**Chiral Separation** (SFC): Chiralpak IA; Flow (CO<sub>2</sub>) = 2.4 mL/min; Flow (isopropanol) = 0.6 mL/min;  
 T = 25 °C; λ = 250 nm; Back pressure = 15 Mpa

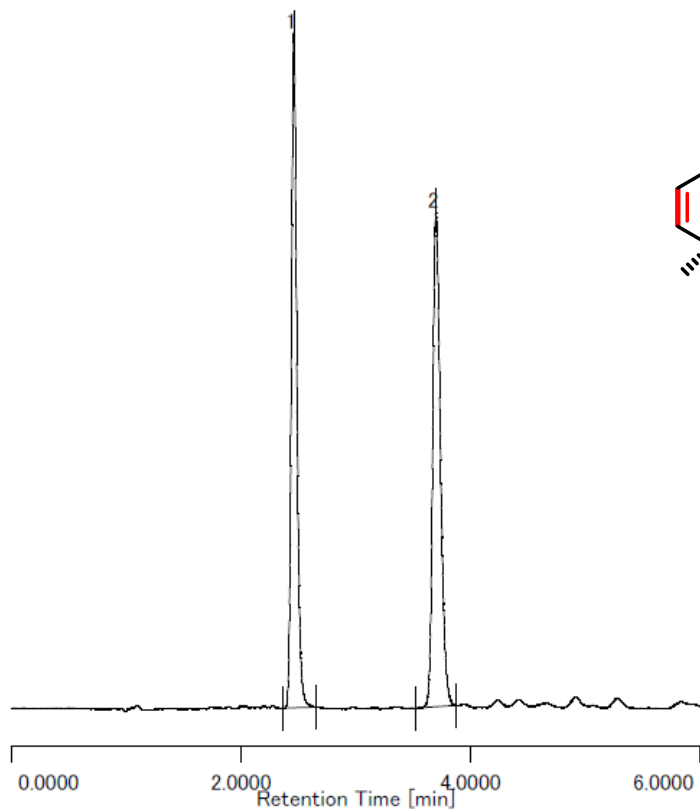

Chromatogram E-565

Name

| # | CH | tR     | Area    | Height | Area%  |
|---|----|--------|---------|--------|--------|
| 1 | 11 | 2.4583 | 2639959 | 806009 | 48.986 |
| 2 | 11 | 3.6933 | 2749229 | 591828 | 51.014 |

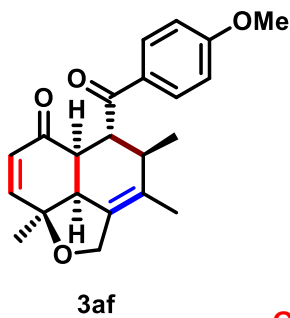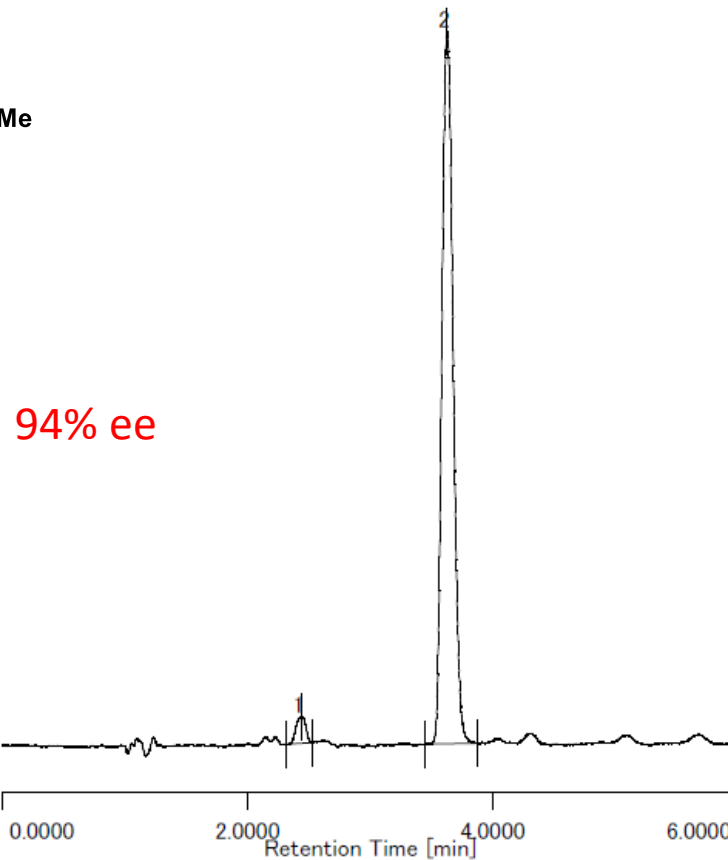

Chromatogram R-654-p-OMe-PPK

Name

| # | CH | tR     | Area    | Height | Area%  |
|---|----|--------|---------|--------|--------|
| 1 | 11 | 2.4383 | 66360   | 12213  | 3.217  |
| 2 | 11 | 3.6217 | 1996317 | 317255 | 96.783 |

94% ee

Supplementary Figure 12.  $^1\text{H}$ ,  $^{13}\text{C}$ -NMR and SFC spectra of product 3ag

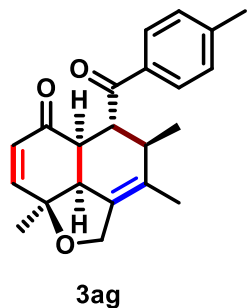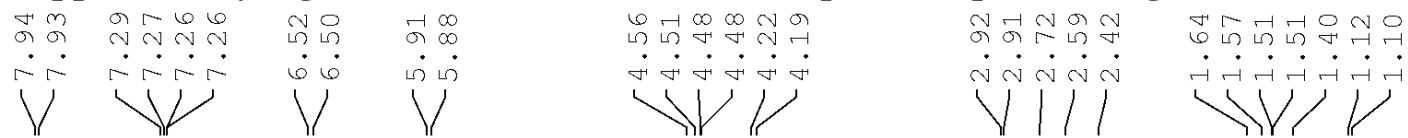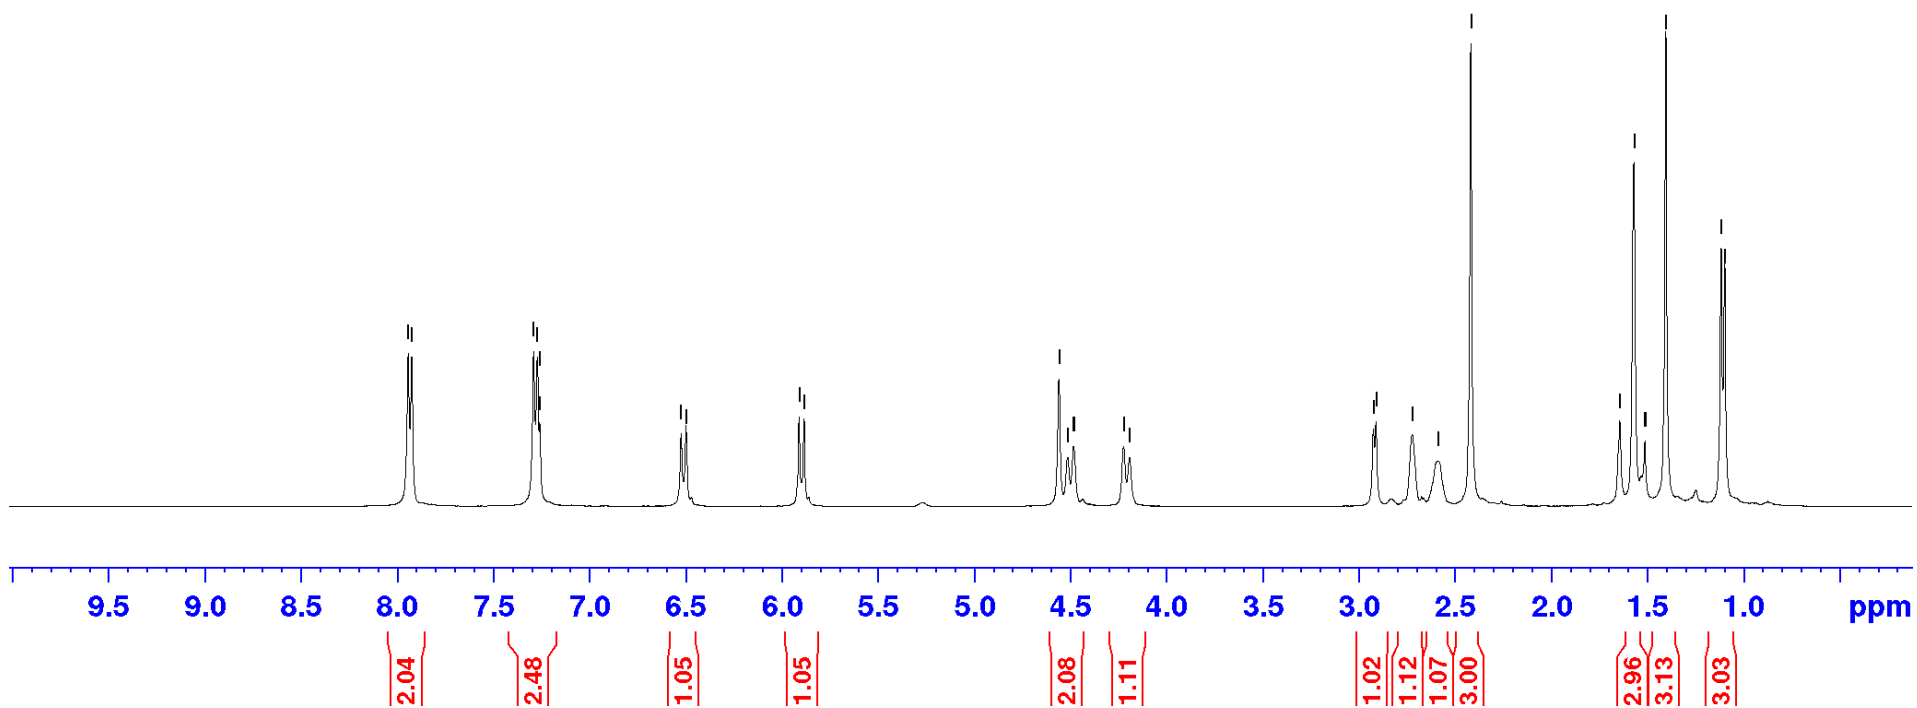

— 201.66  
— 196.45

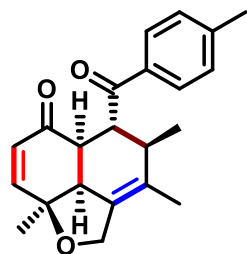

3ag

— 151.91  
— 144.04  
— 133.04  
— 131.19  
— 129.54  
— 128.66  
— 128.36  
— 128.03

— 79.99  
— 77.31  
— 76.99  
— 76.67  
— 68.60

— 48.07  
— 43.88  
— 42.34

— 33.46

— 24.05  
— 21.62  
— 20.63  
— 17.20

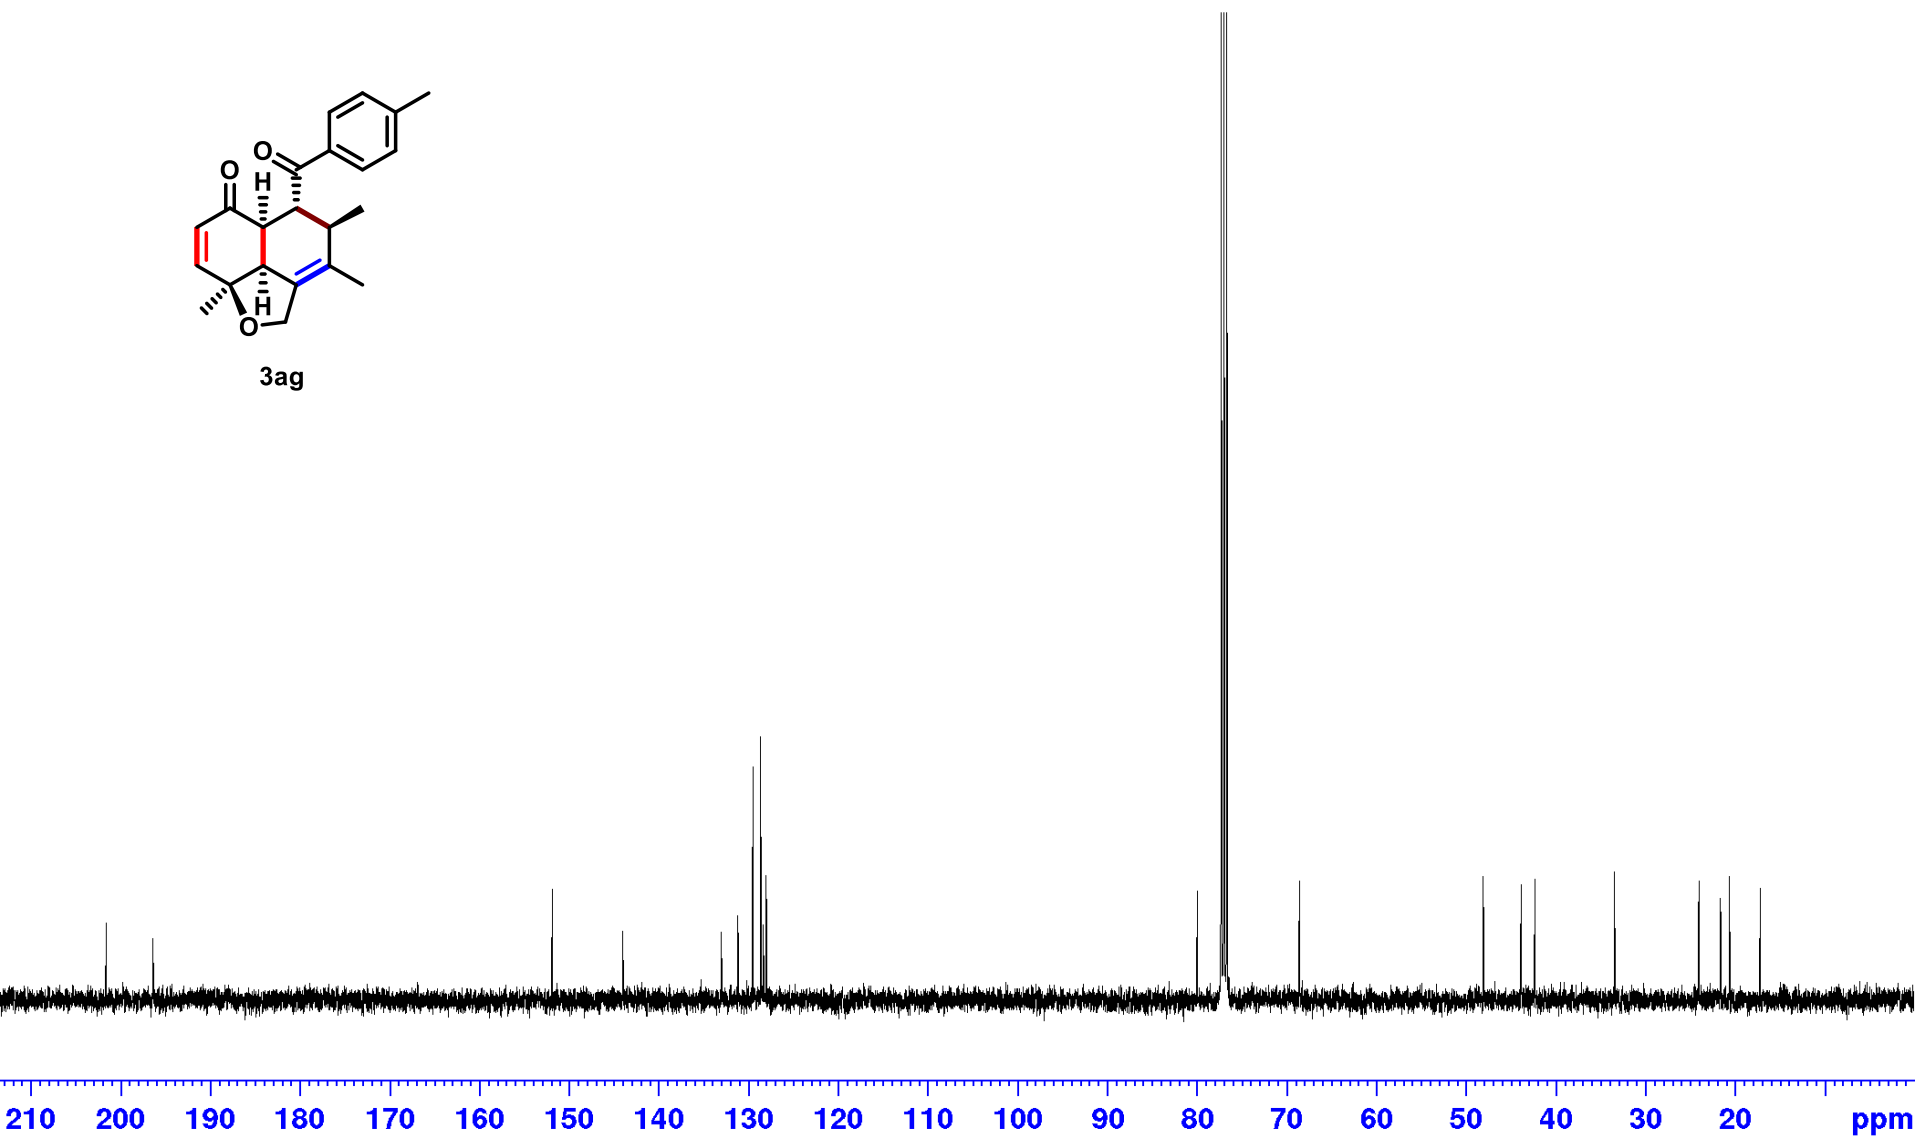

**Chiral Separation** (SFC): Chiralpak IA; Flow (CO<sub>2</sub>) = 3.0 mL/min; Flow (isopropanol) = 0.3 mL/min;  
 T = 25 °C;  $\lambda$  = 250 nm; Back pressure = 15 Mpa

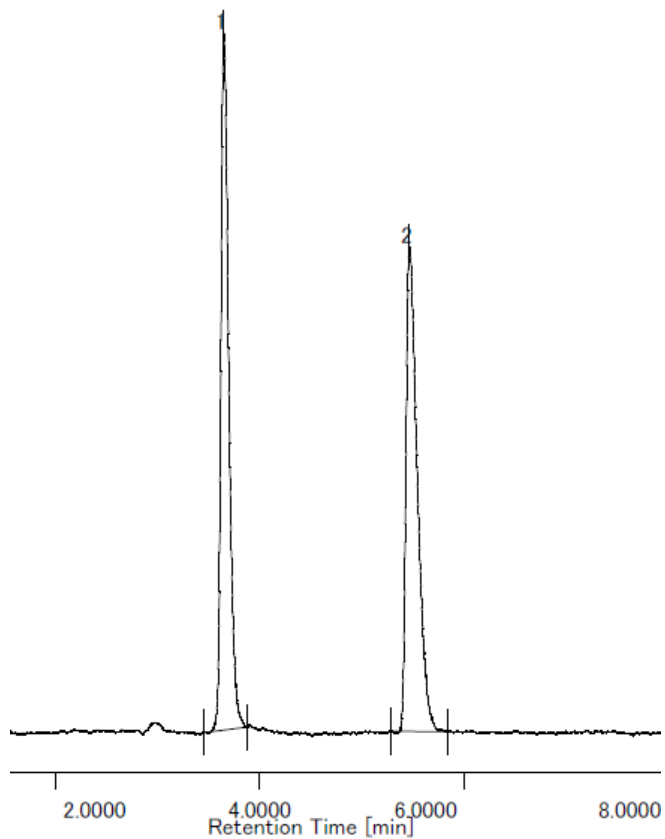

Chromatogram E-654-p-Me-PPK (R)

Name

| # | CH | tR     | Area    | Height | Area%  |
|---|----|--------|---------|--------|--------|
| 1 | 10 | 3.6467 | 1918765 | 362037 | 49.748 |
| 2 | 10 | 5.4617 | 1938168 | 251536 | 50.252 |

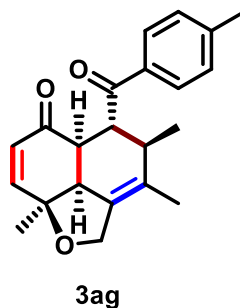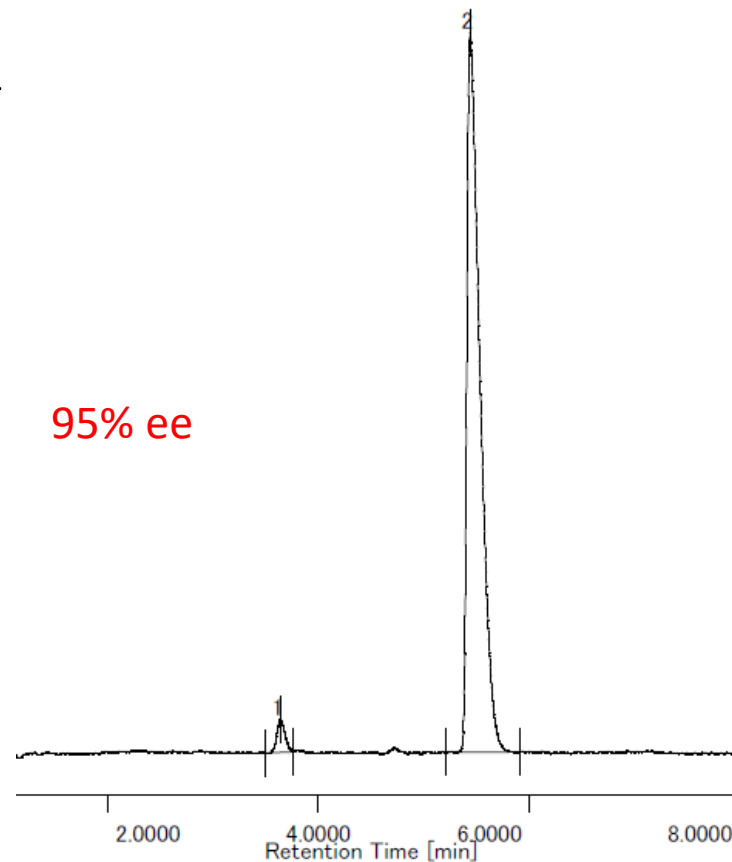

95% ee

Chromatogram R-676-p-Me-PPK(C)

Name

| # | CH | tR     | Area    | Height | Area%  |
|---|----|--------|---------|--------|--------|
| 1 | 10 | 3.6383 | 112471  | 21713  | 2.699  |
| 2 | 10 | 5.4367 | 4054507 | 472044 | 97.301 |

Supplementary Figure 13.  $^1\text{H}$ ,  $^{13}\text{C}$ -NMR and SFC spectra of product 3ah

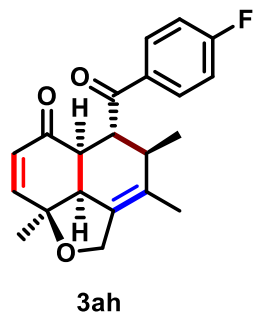

8.09  
8.07  
8.07  
8.05

7.26  
7.18  
7.16  
7.14  
7.12

6.54  
6.54  
6.52  
6.51

5.92  
5.90

4.54  
4.52  
4.48

4.23  
4.19

2.89  
2.89  
2.88

2.71  
2.59  
2.58

1.64  
1.58  
1.42

1.12  
1.10  
1.06  
1.05

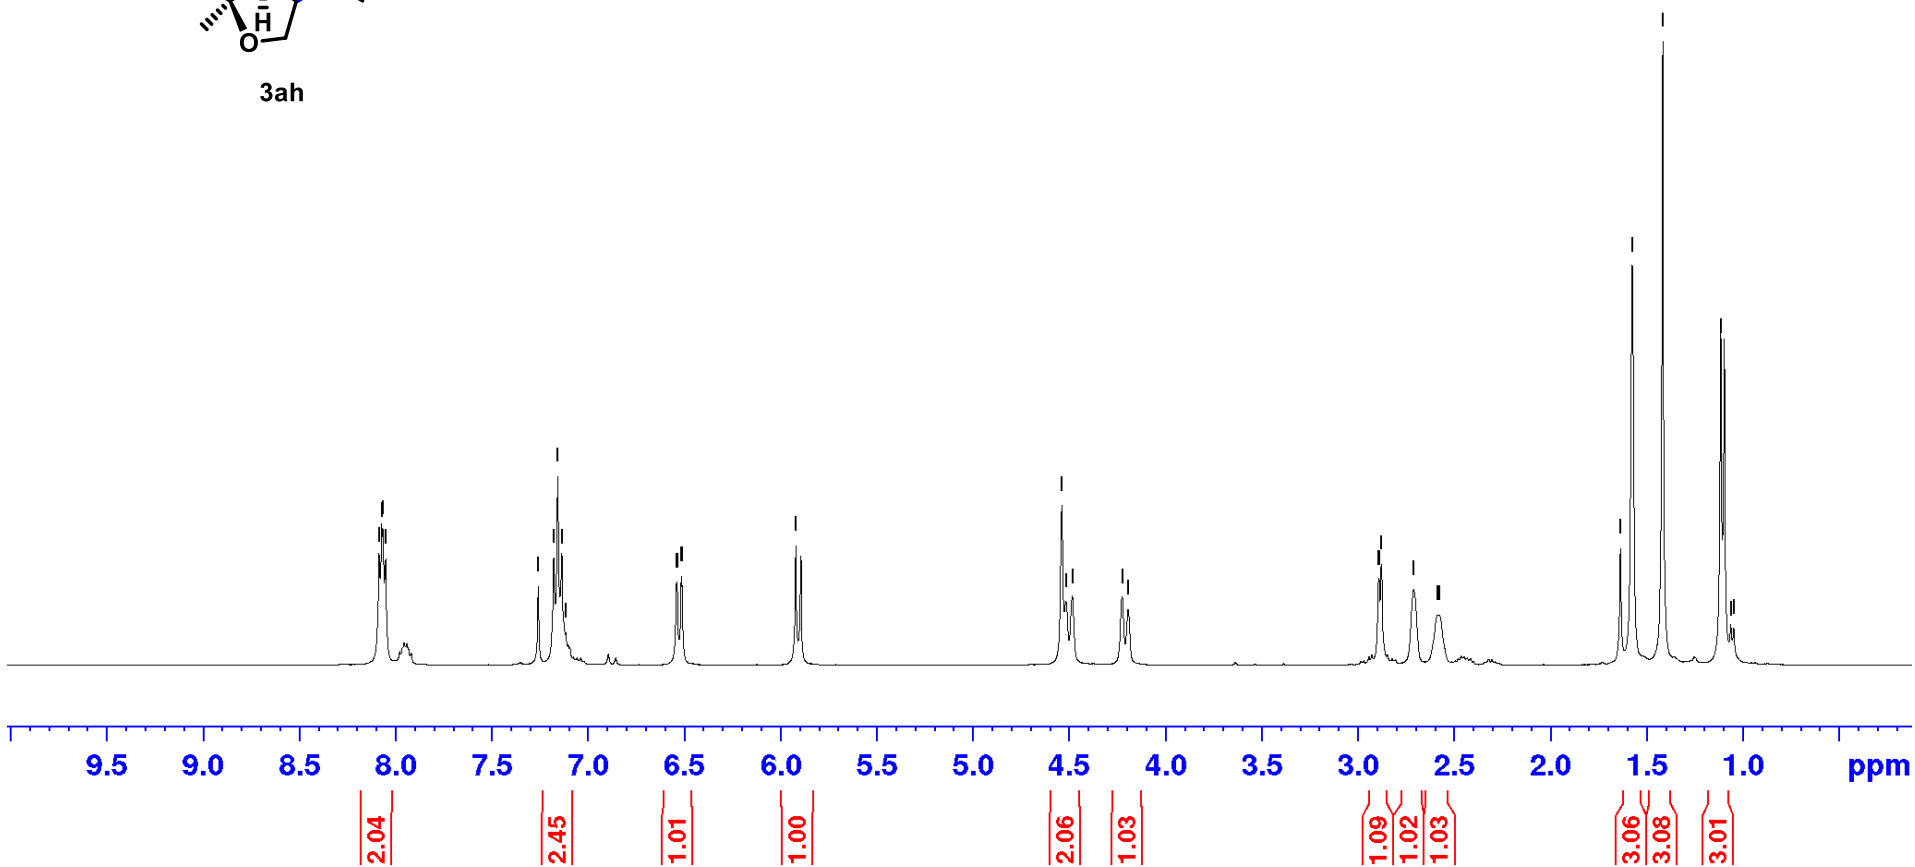



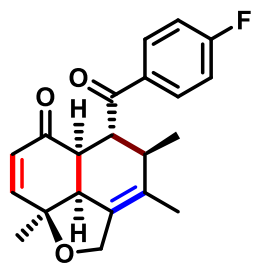

3ah

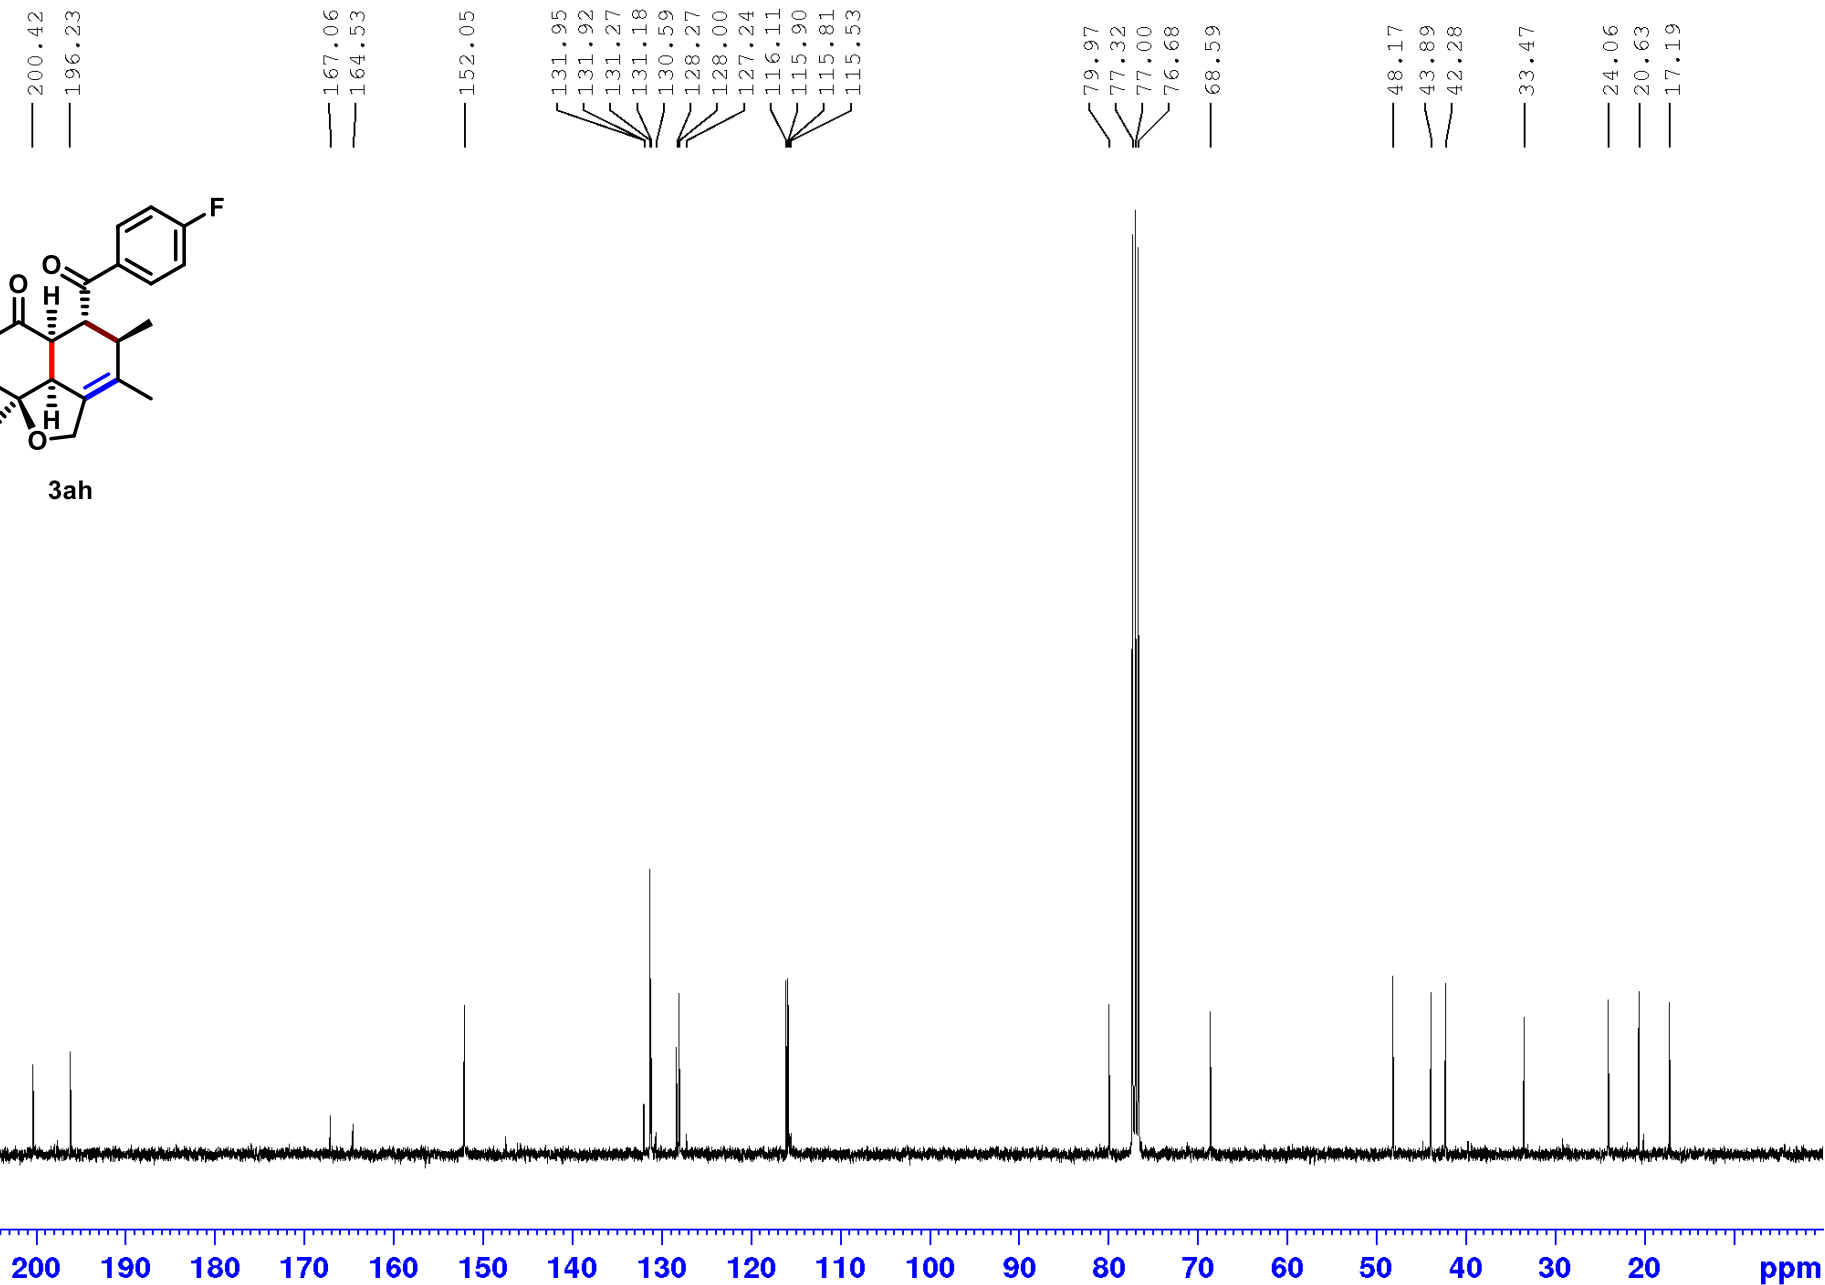

**Chiral Separation** (SFC): Chiralpak IA; Flow (CO<sub>2</sub>) = 3.0 mL/min; Flow (isopropanol) = 0.3 mL/min;  
T = 25 °C; λ = 250 nm; Back pressure = 15 Mpa

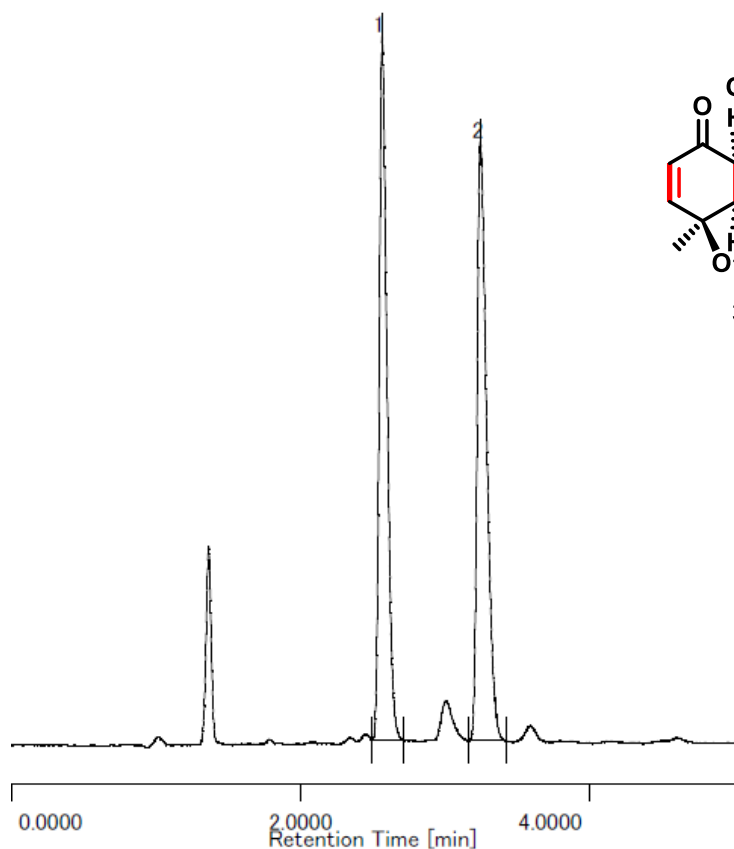

Chromatogram E-566

Name

| # | CH | tR     | Area    | Height | Area%  |
|---|----|--------|---------|--------|--------|
| 1 | 10 | 2.5650 | 2979865 | 805647 | 49.010 |
| 2 | 10 | 3.2433 | 3100264 | 685843 | 50.990 |

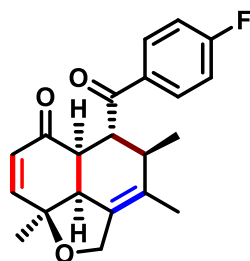

3ah

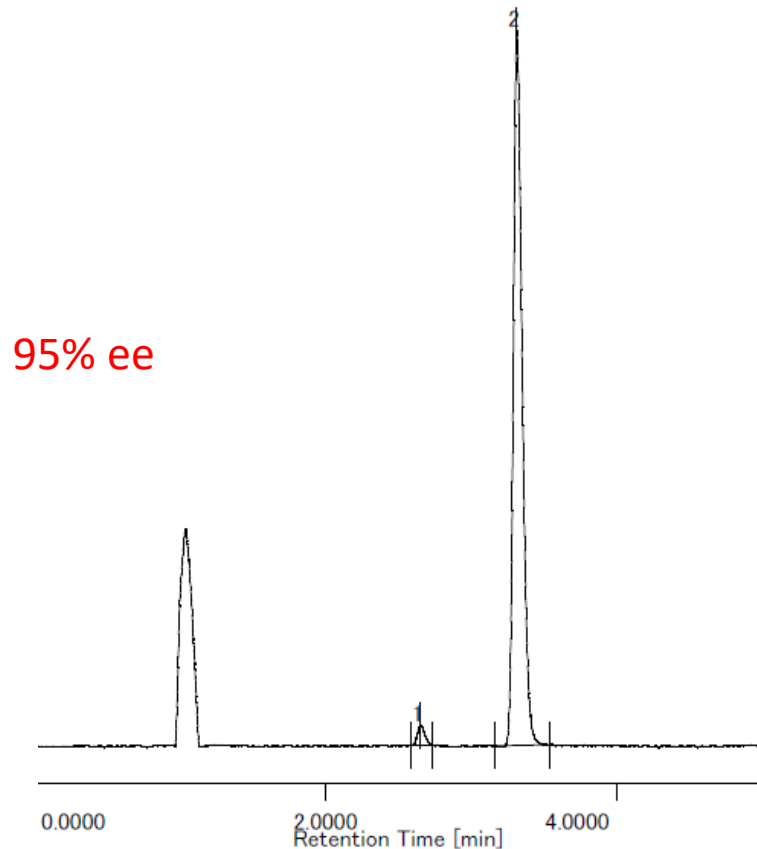

Chromatogram R-655-p-F-PPK

Name

| # | CH | tR     | Area    | Height  | Area%  |
|---|----|--------|---------|---------|--------|
| 1 | 10 | 2.6533 | 107134  | 30734   | 2.281  |
| 2 | 10 | 3.3117 | 4589541 | 1100645 | 97.719 |

Supplementary Figure 14.  $^1\text{H}$ ,  $^{13}\text{C}$ -NMR and SFC spectra of product 3ai

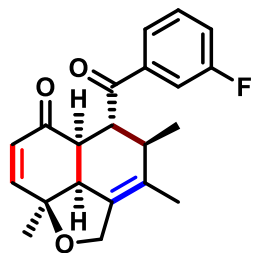

3ai

7.83  
7.81  
7.71  
7.69  
7.68  
7.50  
7.48  
7.48  
7.46  
7.46  
7.44  
7.30  
7.30  
7.28  
7.28  
7.26  
6.54  
6.53  
6.51  
6.51  
5.92  
5.89

4.52  
4.48  
4.48  
4.22  
4.19

2.91  
2.91  
2.90  
2.71  
2.58  
2.57

1.63  
1.57  
1.51  
1.42  
1.12  
1.10

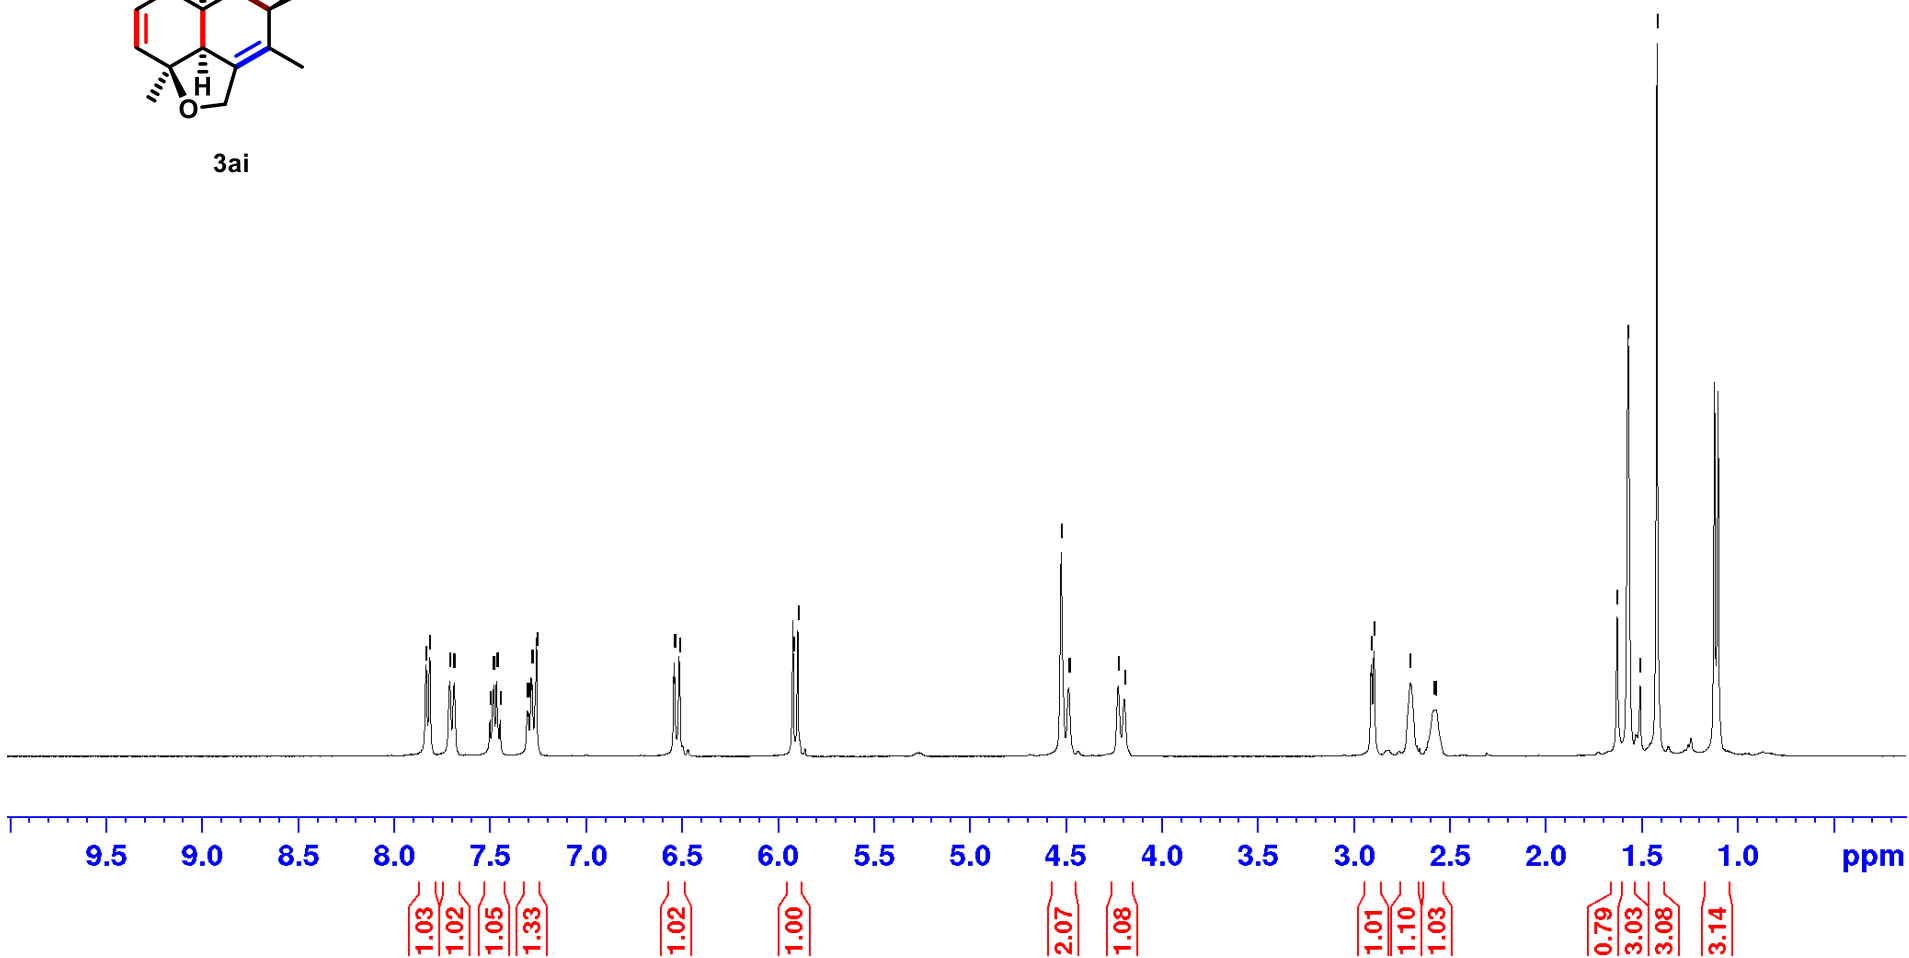

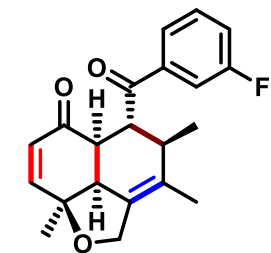

3ai

— 200.75  
— 196.08

— 164.26  
— 161.79

— 152.01

137.83  
137.77  
131.31  
130.60  
130.52  
128.18  
128.00  
124.21  
124.18  
120.37  
120.16  
115.45  
115.23

— 79.97

— 68.59

— 48.47

— 43.89

— 42.08

— 33.42

— 24.06

— 20.64

— 17.18

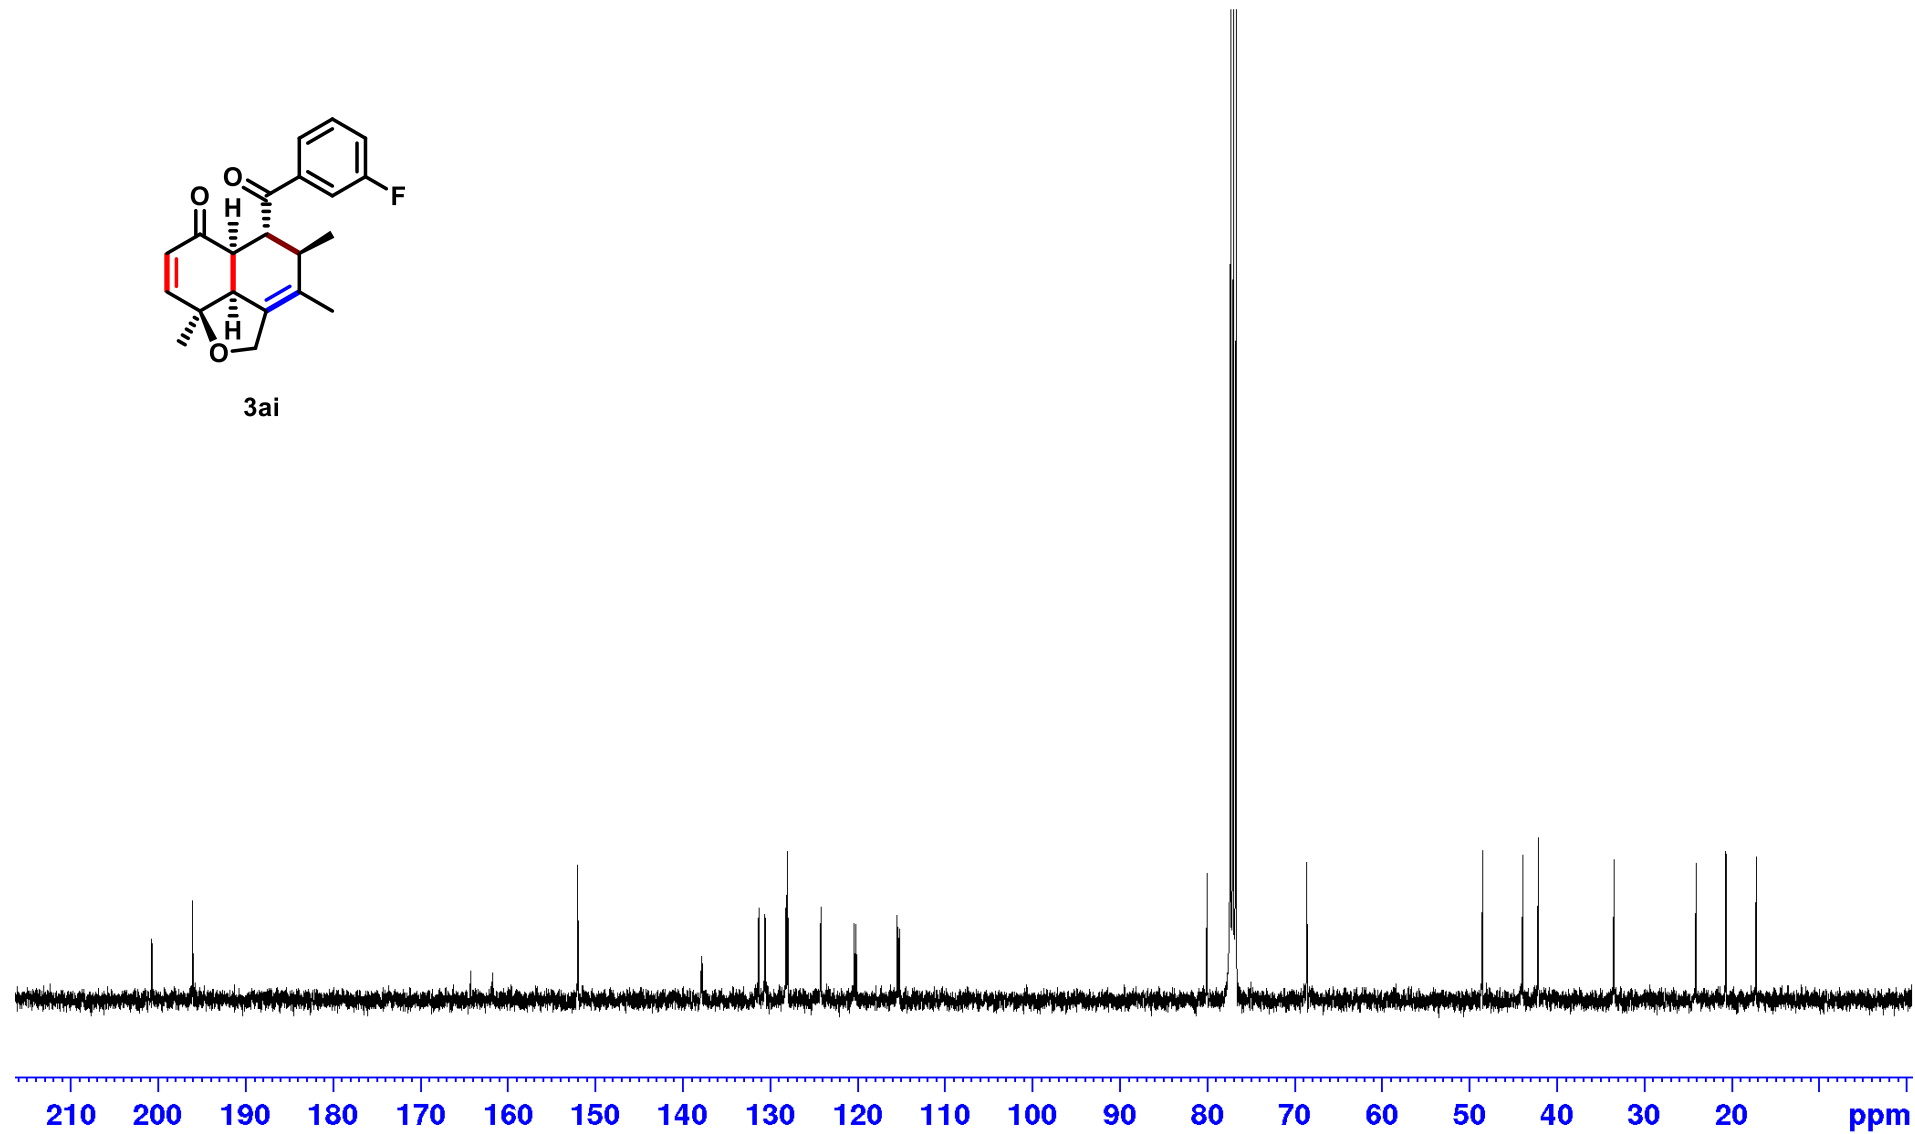

**Chiral Separation** (SFC): Chiralpak IA; Flow (CO<sub>2</sub>) = 4.5 mL/min; Flow (isopropanol) = 0.2 mL/min;  
 T = 25 °C; λ = 250 nm; Back pressure = 15 Mpa

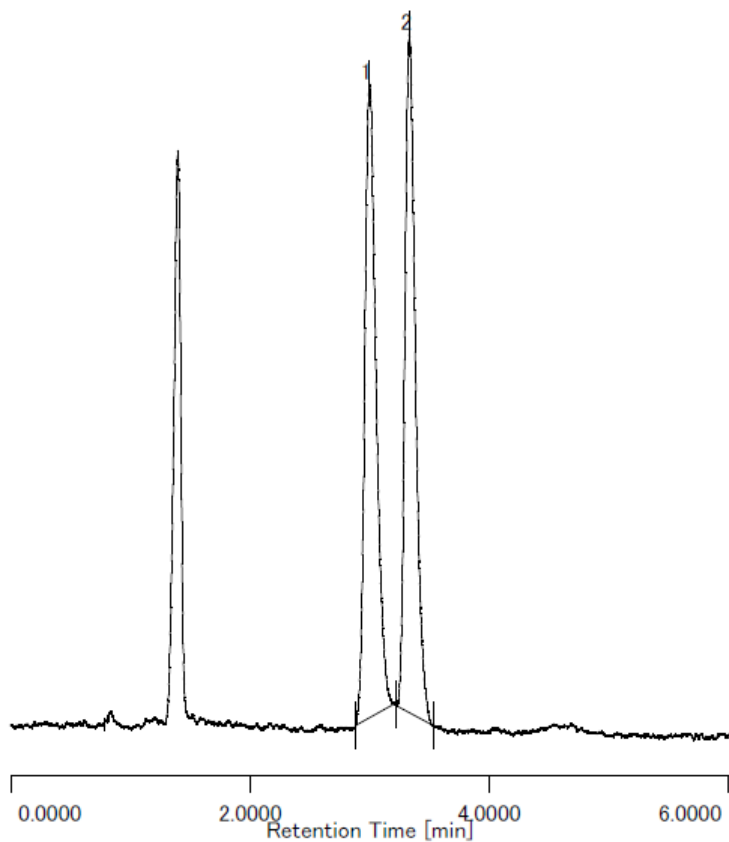

Chromatogram E-567

Name

| # | CH | tR     | Area   | Height | Area%  |
|---|----|--------|--------|--------|--------|
| 1 | 10 | 2.9933 | 653527 | 99269  | 50.448 |
| 2 | 10 | 3.3267 | 641924 | 106257 | 49.552 |

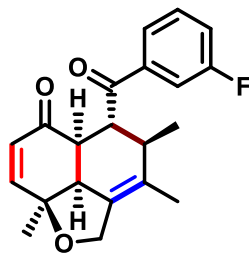

3ai

97% ee

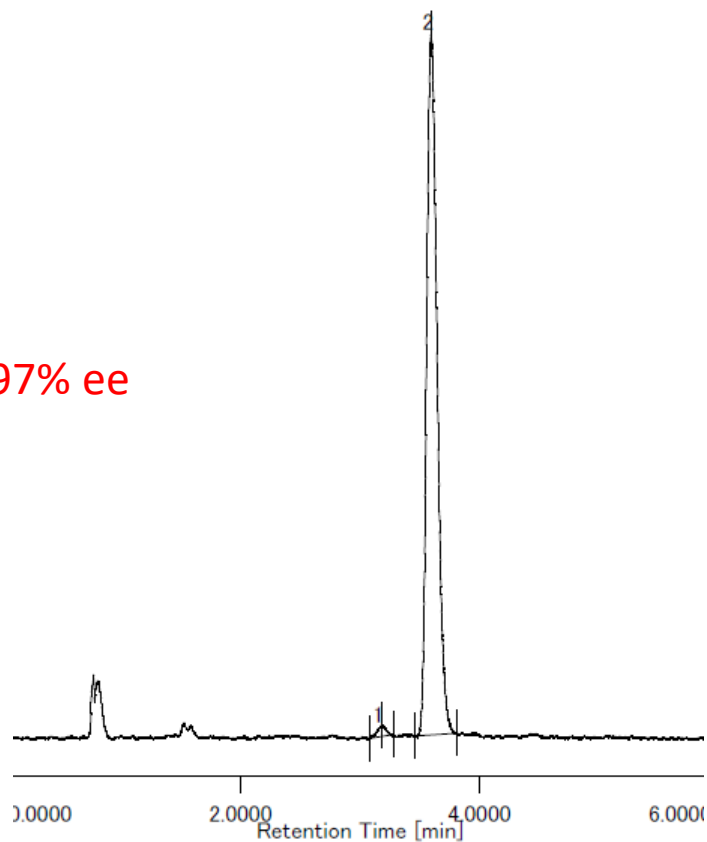

Chromatogram R-656-m-F-PPK

Name

| # | CH | tR     | Area    | Height | Area%  |
|---|----|--------|---------|--------|--------|
| 1 | 10 | 3.1733 | 23472   | 4668   | 1.305  |
| 2 | 10 | 3.5917 | 1775710 | 296078 | 98.695 |



— 201.53  
— 195.55

— 150.94  
— 143.42  
— 135.25  
— 134.10  
— 133.27  
— 129.15  
— 129.10  
— 128.80  
— 128.74  
— 128.27  
— 126.56  
— 126.07

— 82.69  
— 77.31  
— 77.19  
— 76.99  
— 76.67  
— 68.40

— 49.57  
— 44.89  
— 43.42  
— 42.01

— 31.06

— 18.14

— 8.03

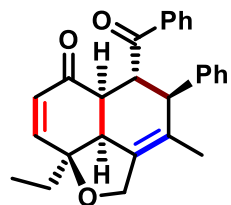

3bb

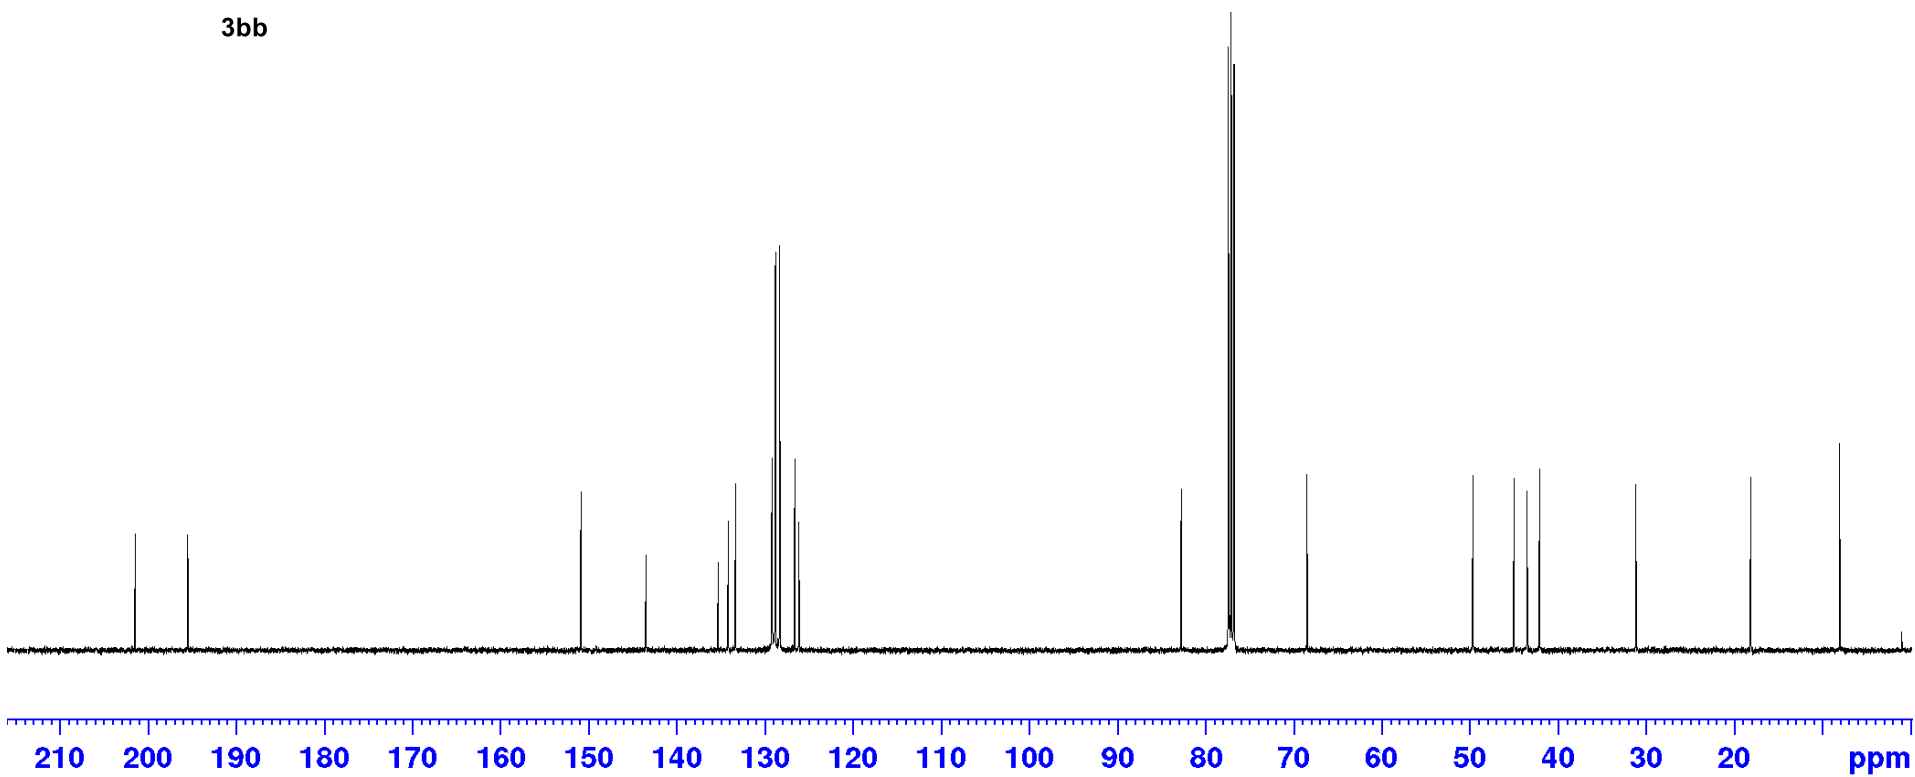

**Chiral Separation** (SFC): Chiralpak IA; Flow (CO<sub>2</sub>) = 3.0 mL/min; Flow (isopropanol) = 0.3 mL/min;  
 T = 25 °C; λ = 250 nm; Back pressure = 15 Mpa

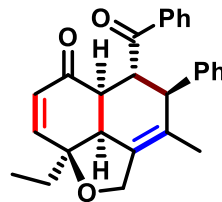

99% ee

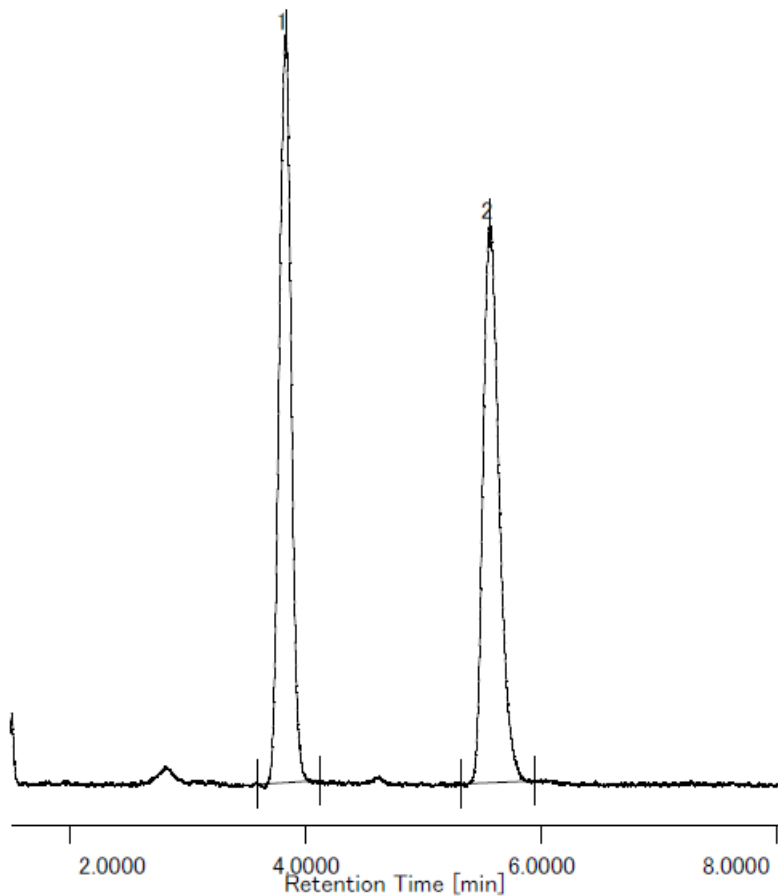

Chromatogram R-695

Name

| # | CH | tR     | Area   | Height | Area%  |
|---|----|--------|--------|--------|--------|
| 1 | 11 | 3.8250 | 843034 | 119024 | 49.959 |
| 2 | 11 | 5.5550 | 844424 | 89022  | 50.041 |

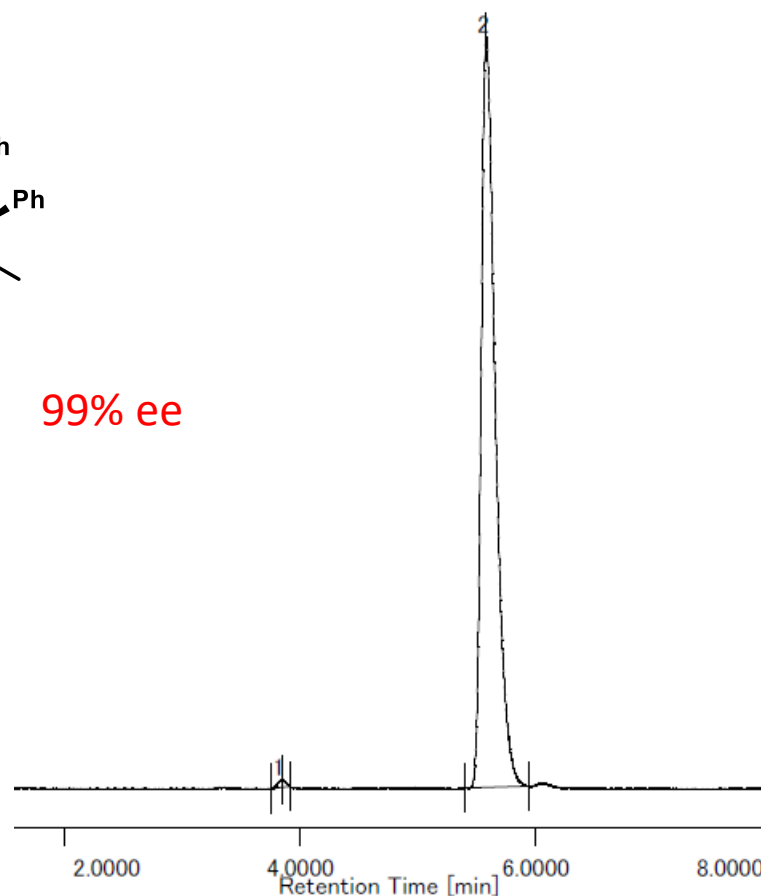

Chromatogram R-699

Name

| # | CH | tR     | Area    | Height | Area%  |
|---|----|--------|---------|--------|--------|
| 1 | 11 | 3.8417 | 22987   | 5210   | 0.551  |
| 2 | 11 | 5.5750 | 4149429 | 498958 | 99.449 |



Supplementary Figure 16.  $^1\text{H}$ ,  $^{13}\text{C}$ -NMR and SFC spectra of product 3bj

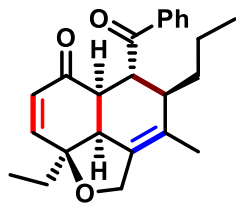

3bj

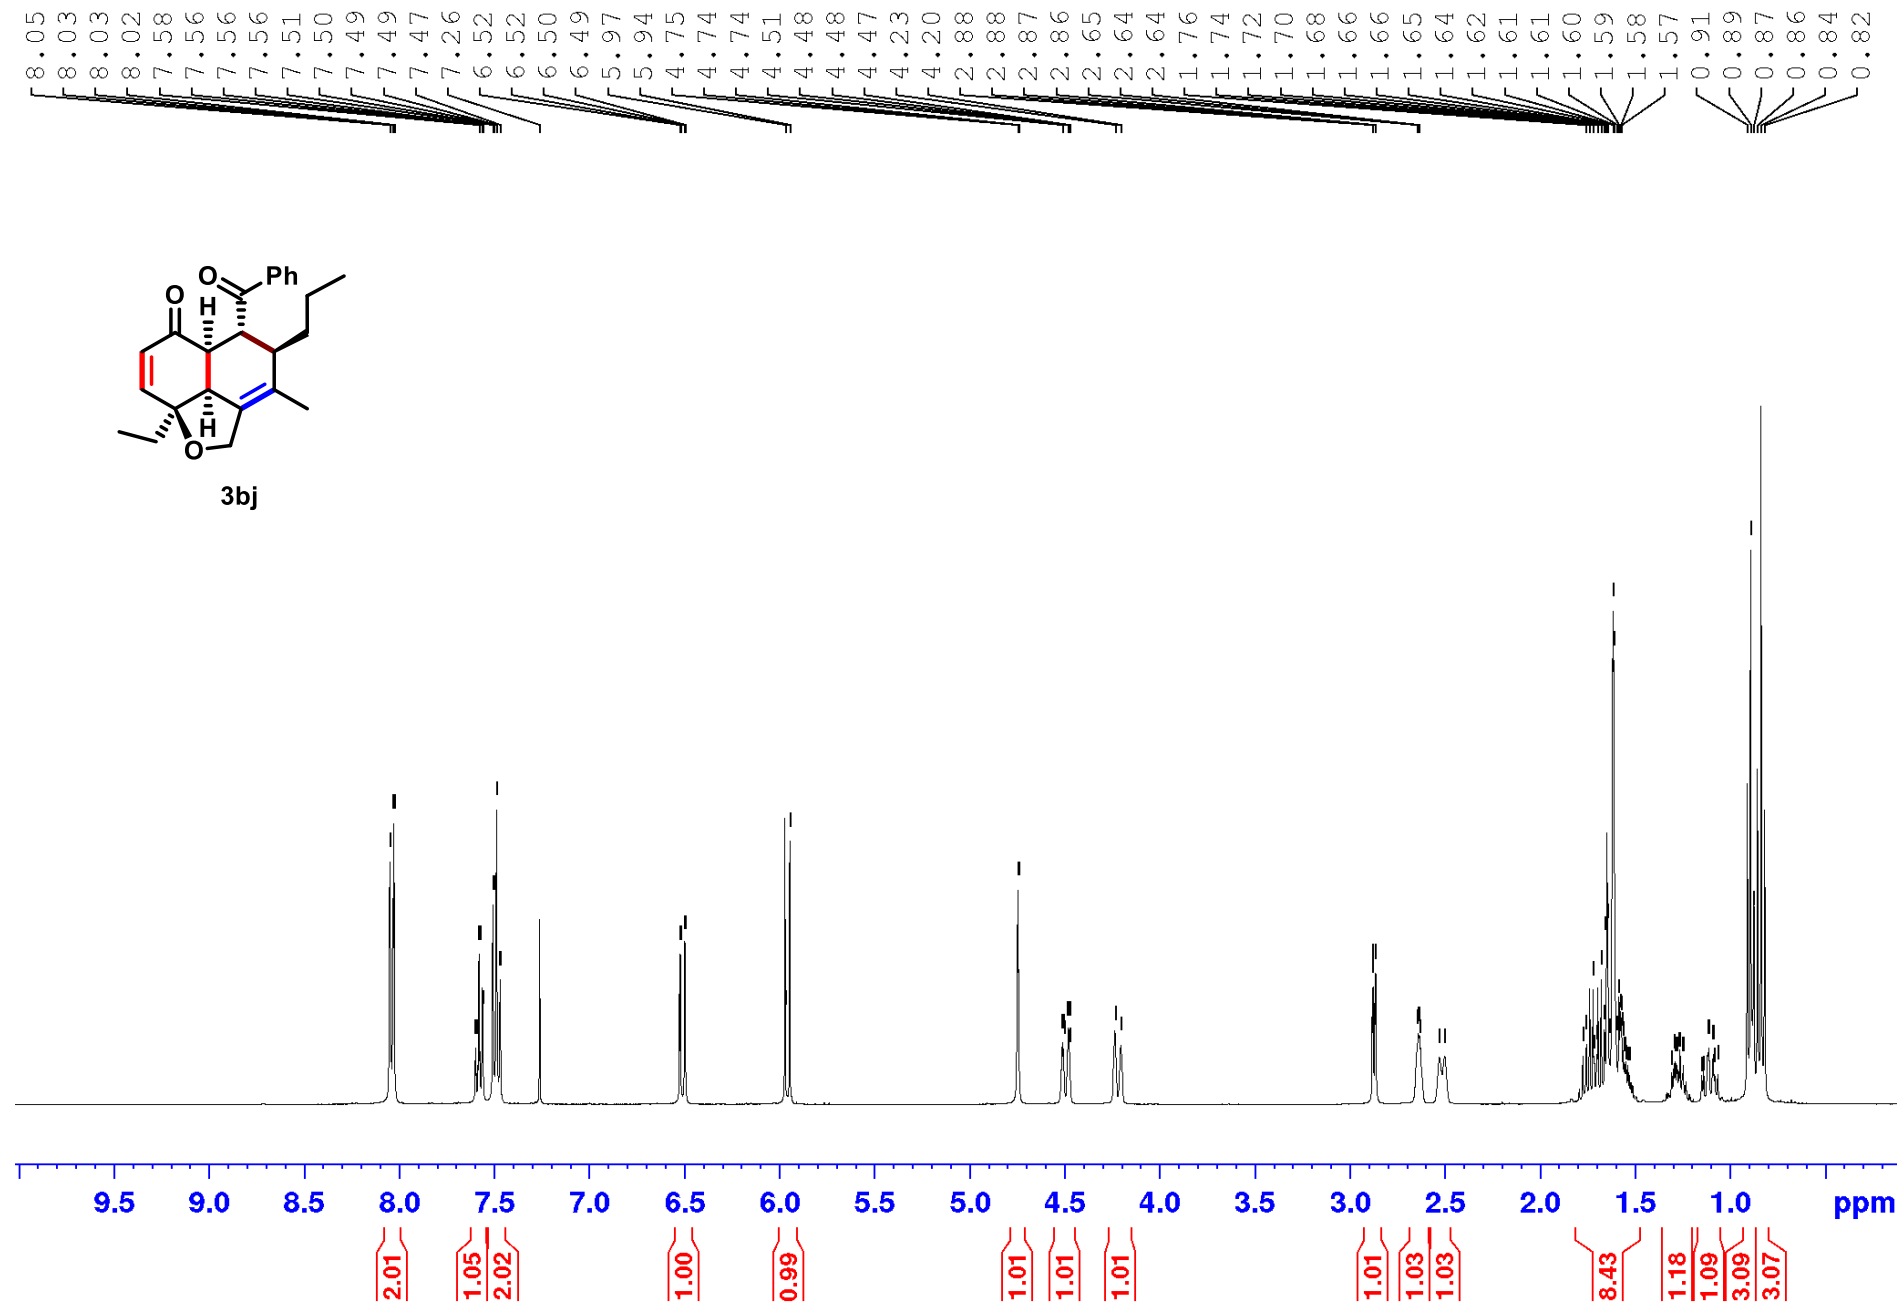

— 202.31  
— 196.28

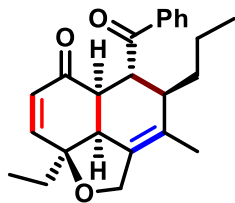

3bj

— 151.21

135.42  
133.15  
131.49  
128.92  
128.82  
128.45  
127.94

82.54  
77.31  
77.00  
76.68  
68.61

44.36  
42.93  
41.48  
38.20  
34.63  
31.00

21.34  
17.58  
14.10  
7.96

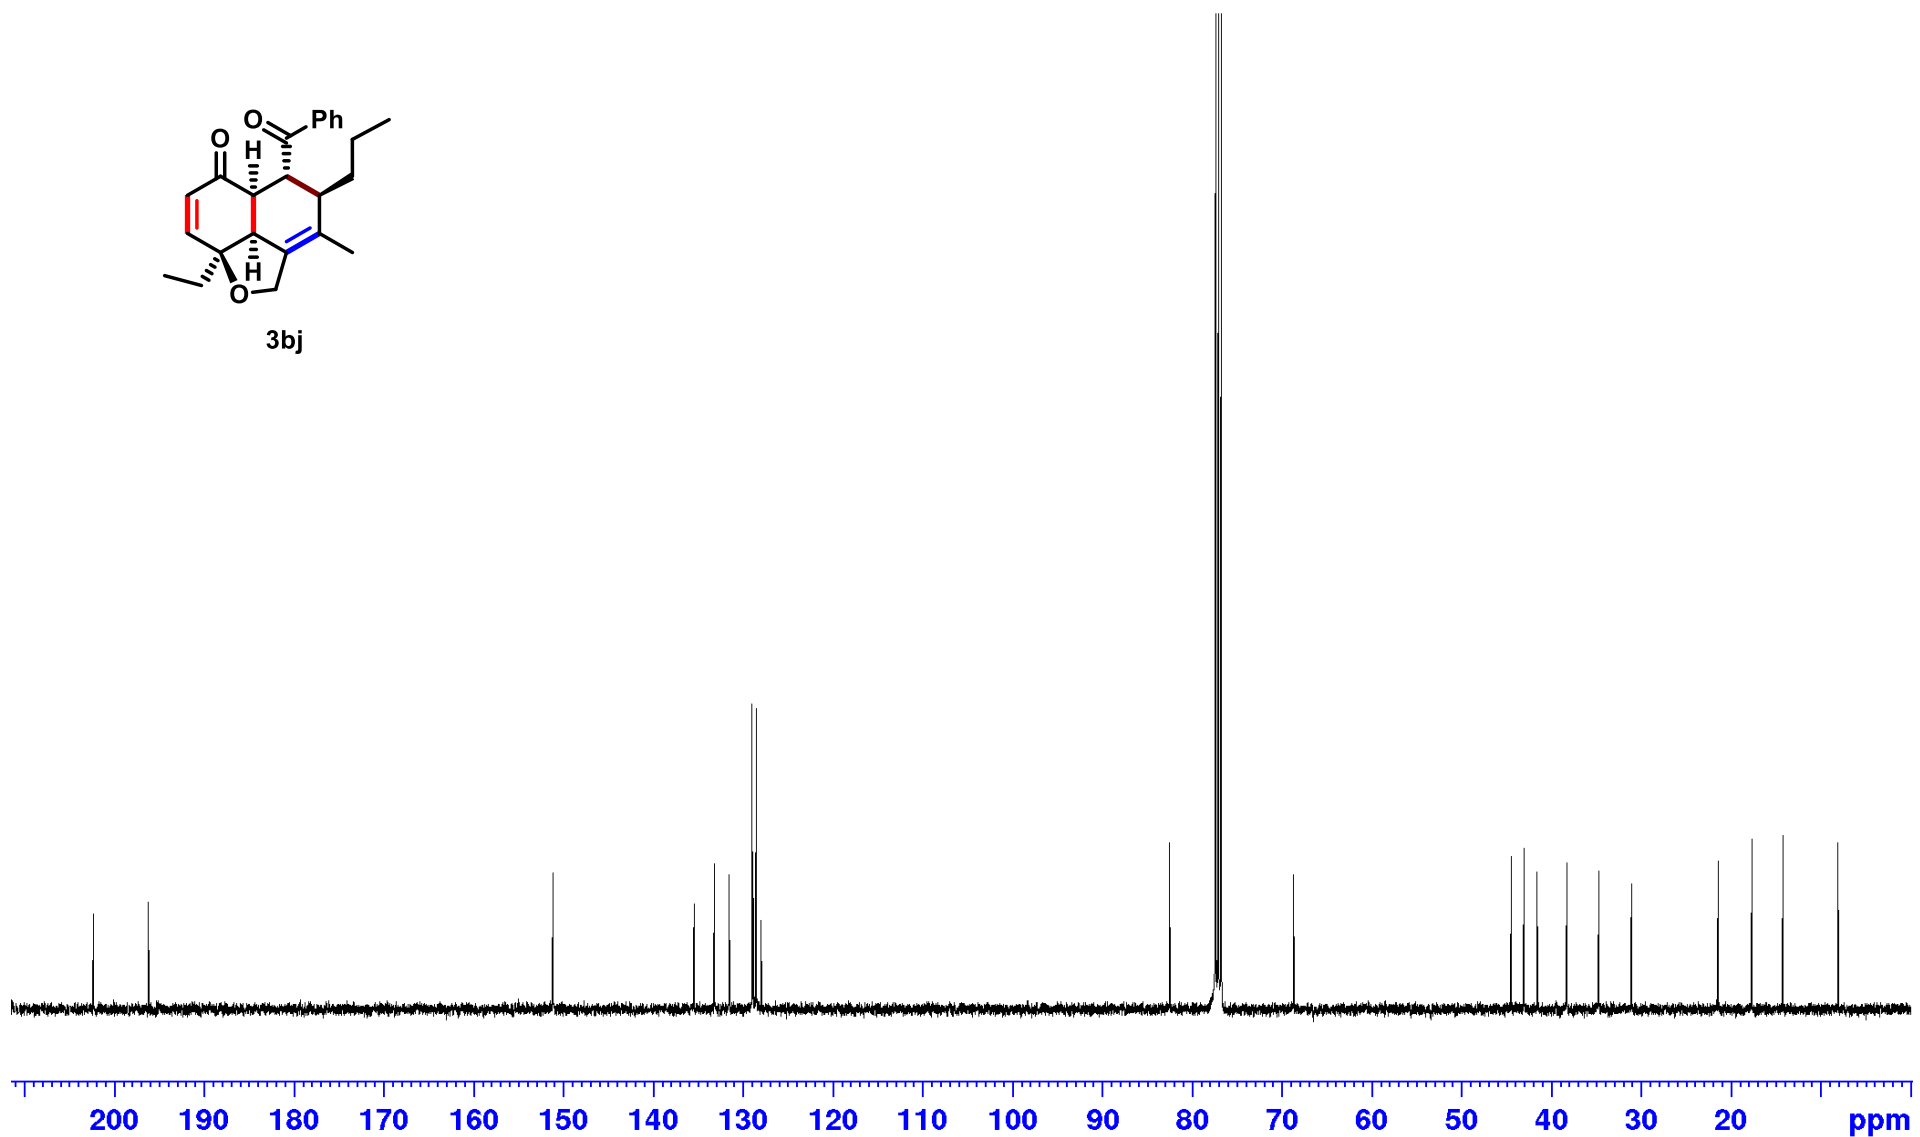

**Chiral Separation (SFC):** Chiralpak IA; Flow (CO<sub>2</sub>) = 3.0 mL/min; Flow (isopropanol) = 0.3 mL/min;  
 T = 25 °C; λ = 250 nm; Back pressure = 15 Mpa

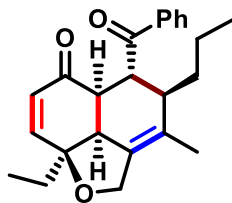

96% ee

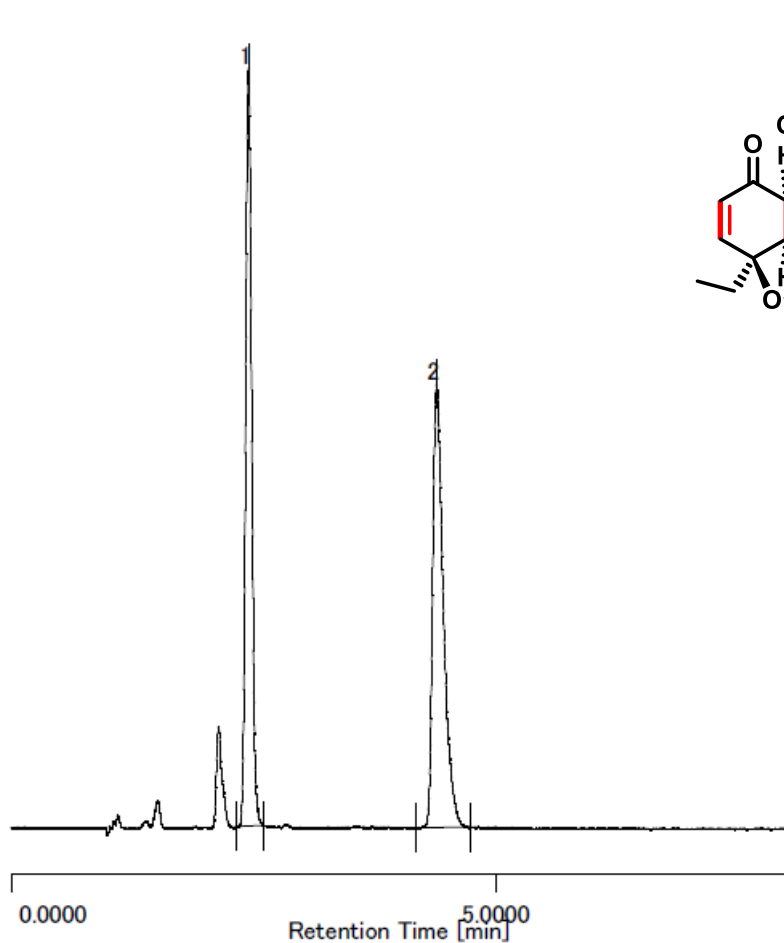

ChromatogramName R-702-rac1

| # | CH | tR     | Area    | Height | Area%  |
|---|----|--------|---------|--------|--------|
| 1 | 9  | 2.4467 | 1630383 | 379574 | 49.024 |
| 2 | 9  | 4.3867 | 1695319 | 222357 | 50.976 |

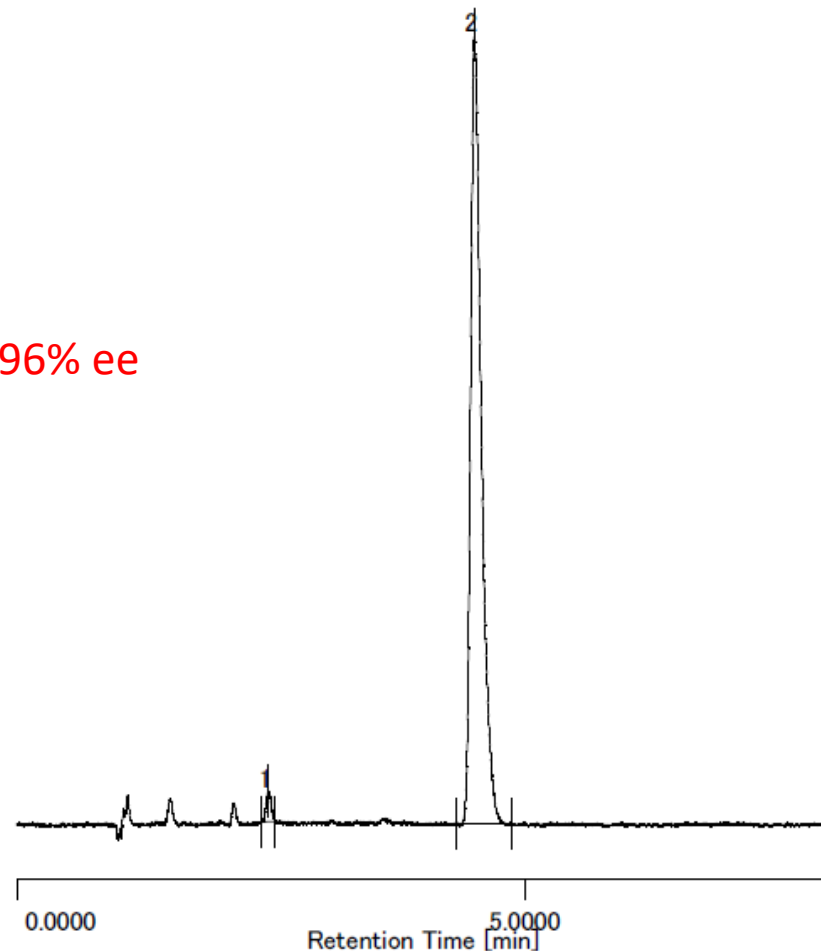

ChromatogramName R-703-chir

| # | CH | tR     | Area    | Height | Area%  |
|---|----|--------|---------|--------|--------|
| 1 | 9  | 2.4767 | 24759   | 7192   | 1.802  |
| 2 | 9  | 4.5000 | 1349495 | 185072 | 98.198 |

Supplementary Figure 17.  $^1\text{H}$ ,  $^{13}\text{C}$ -NMR and SFC spectra of product 3ca

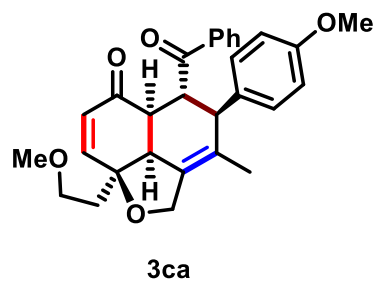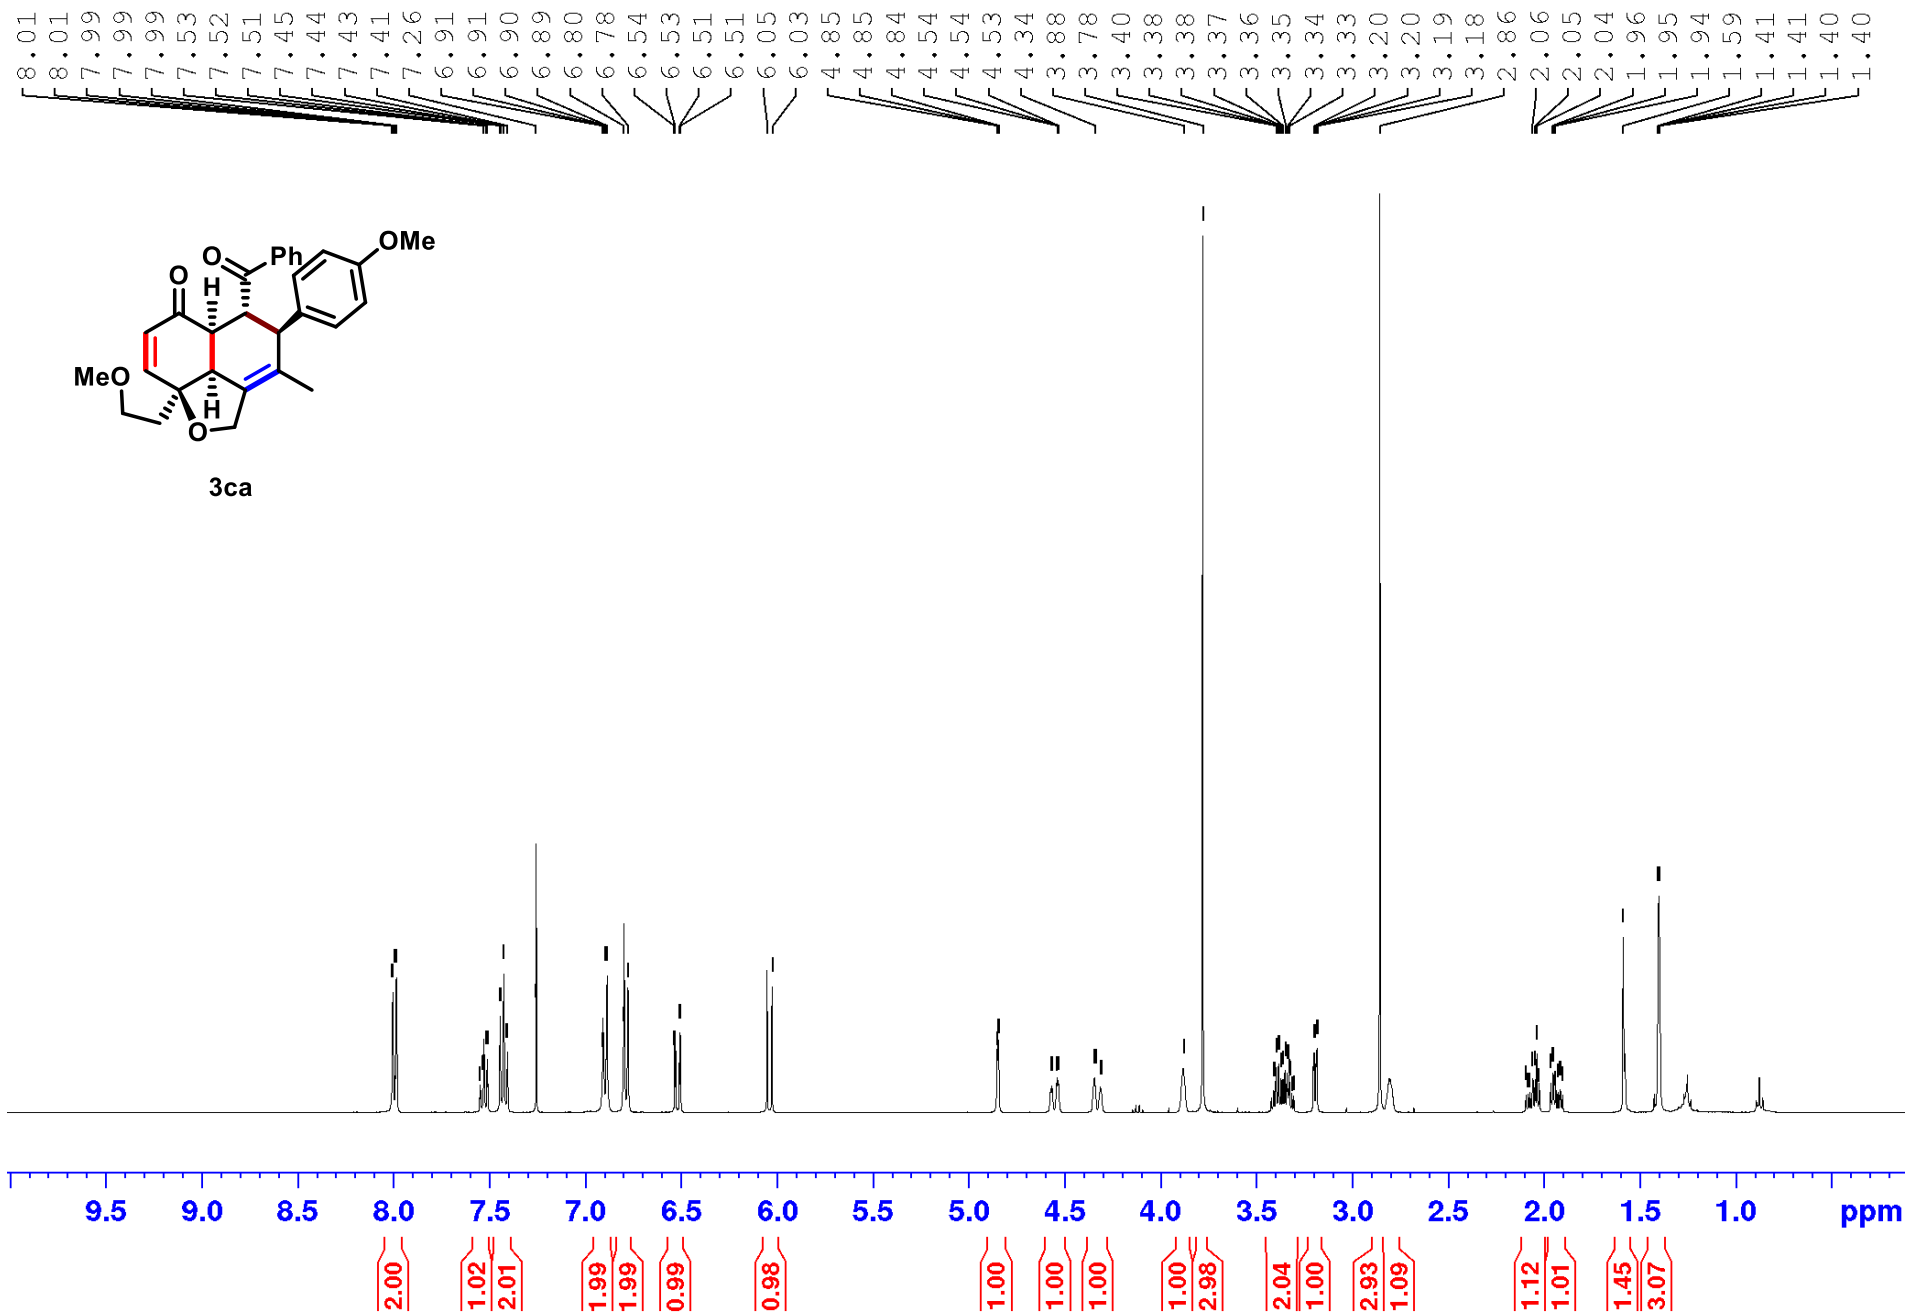

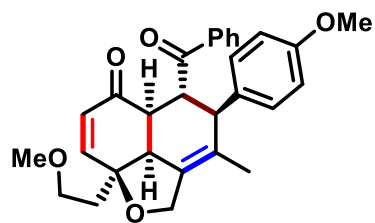

3ca

— 201.26  
— 195.93

— 158.11  
— 150.25  
— 135.77  
— 135.22  
— 133.77  
— 133.15  
— 130.12  
— 129.25  
— 128.78  
— 128.74  
— 126.51  
— 113.62

— 82.07  
— 77.32  
— 77.00  
— 76.68  
— 68.23  
— 67.82

— 57.97  
— 55.11  
— 49.91  
— 43.75  
— 43.12  
— 42.49  
— 38.06

— 18.11

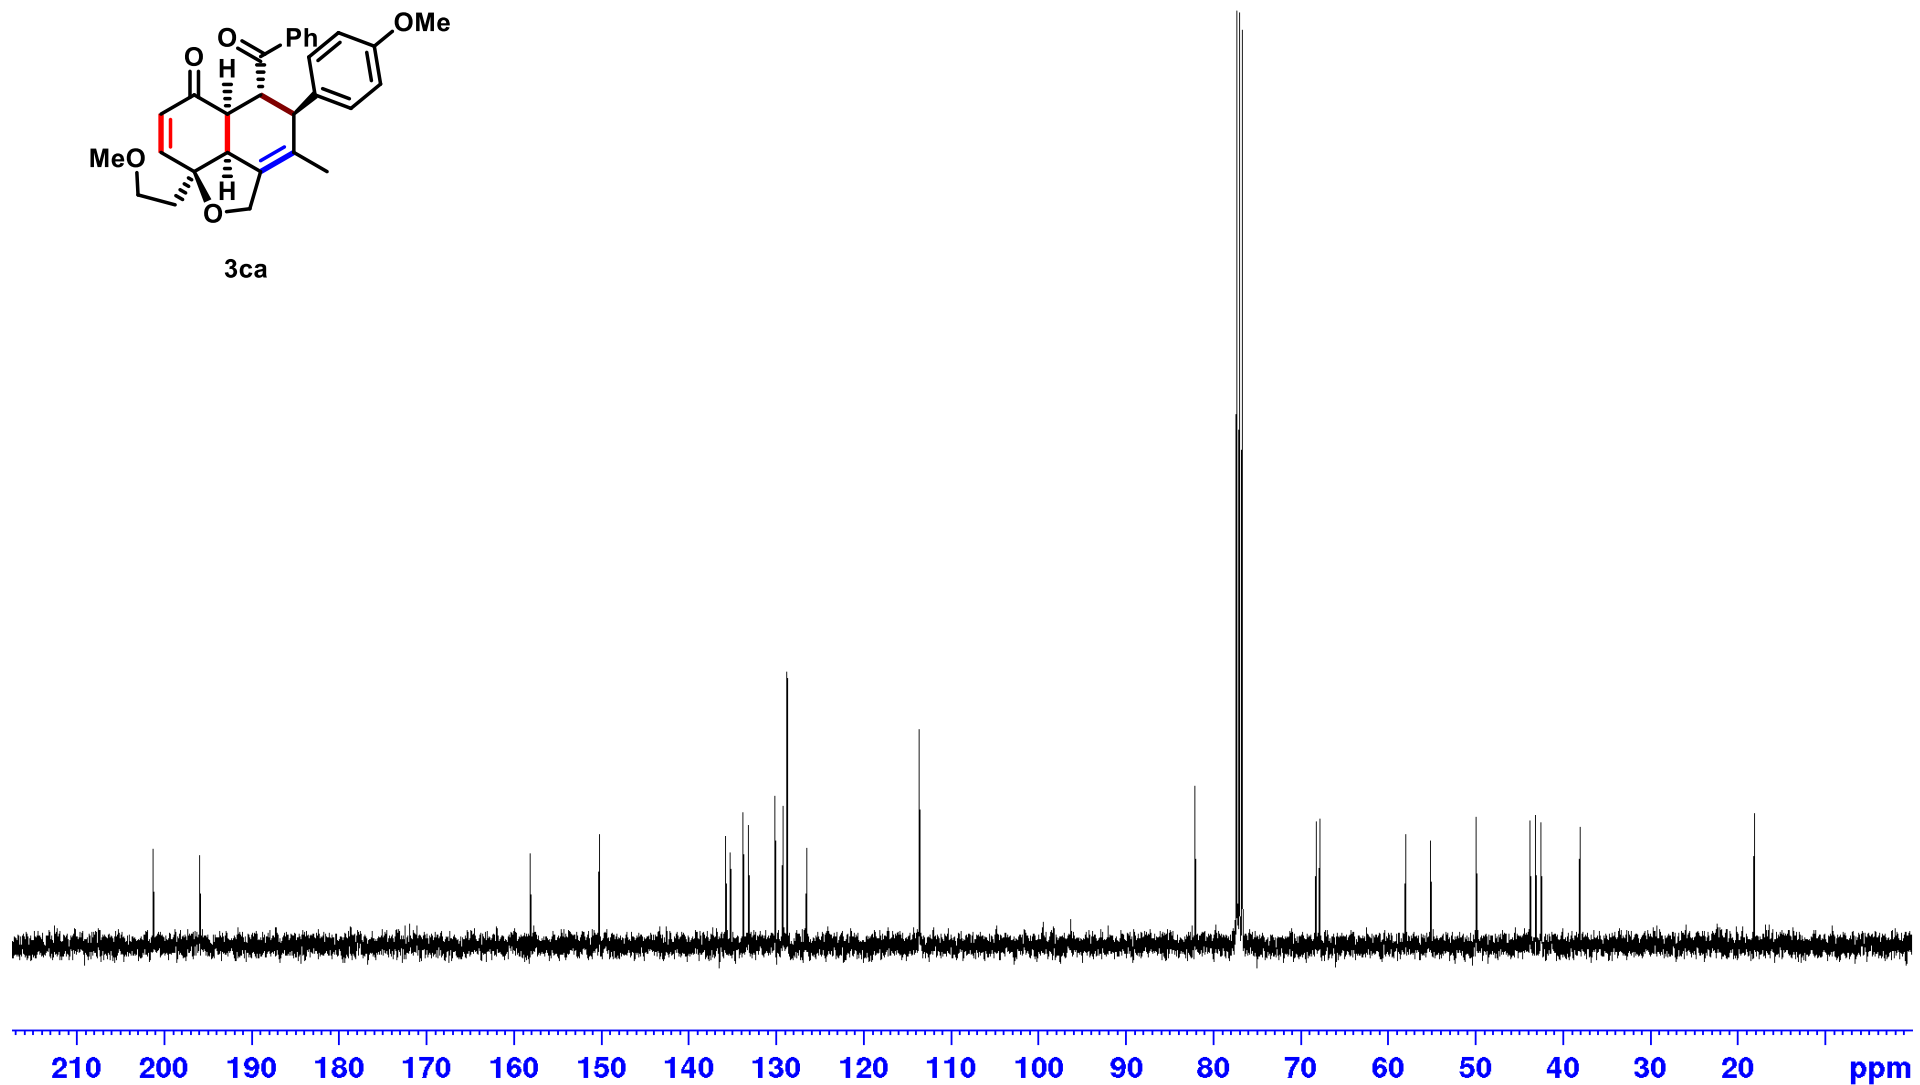

**Chiral Separation** (SFC): Chiralpak IA; Flow (CO<sub>2</sub>) = 2.4 mL/min; Flow (isopropanol) = 0.6 mL/min;  
 T = 25 °C; λ = 250 nm; Back pressure = 15 Mpa

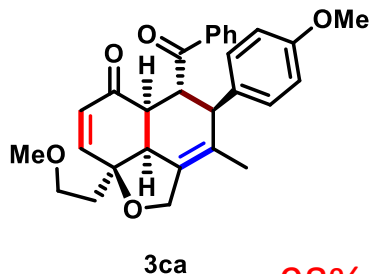

98% ee

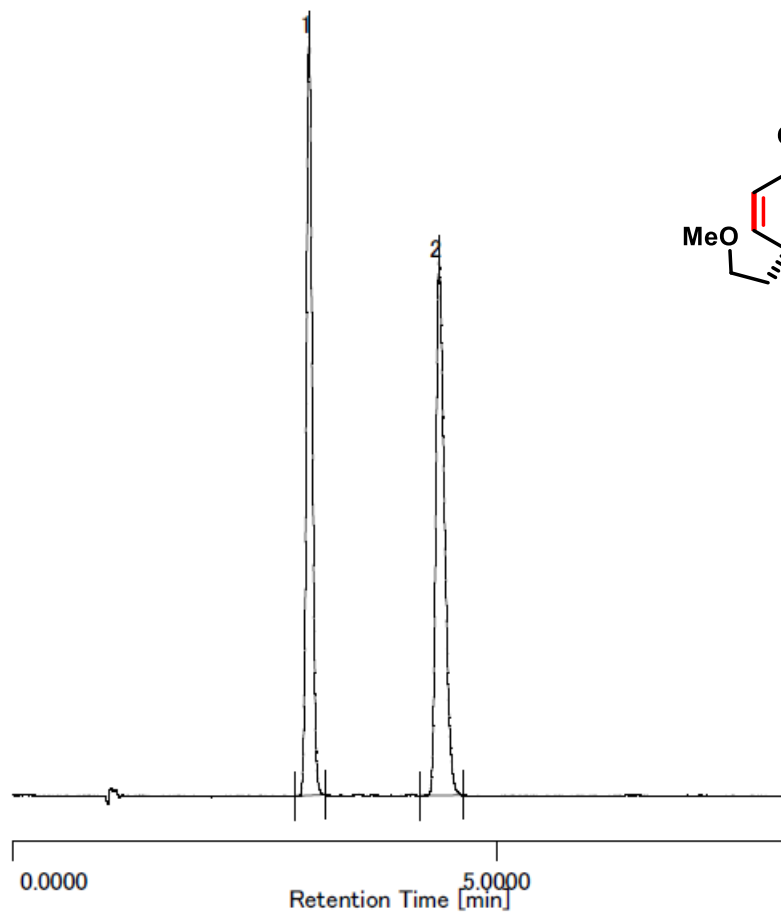

ChromatogramName R-711-rac.OMe-dienone-p-OMe-chalcone

| # | CH | tR     | Area    | Height | Area%  |
|---|----|--------|---------|--------|--------|
| 1 | 9  | 3.0633 | 3343153 | 803691 | 48.961 |
| 2 | 9  | 4.4033 | 3485087 | 567078 | 51.039 |

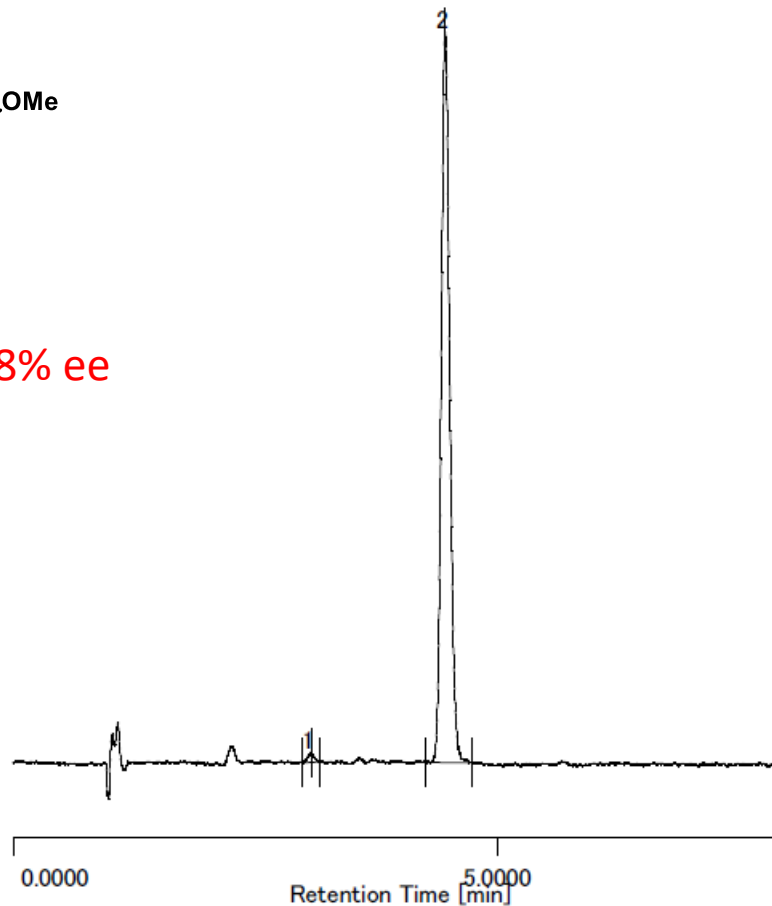

ChromatogramName R-717-Chir.OMe-dienone-p-OMe-chalcone

| # | CH | tR     | Area   | Height | Area%  |
|---|----|--------|--------|--------|--------|
| 1 | 9  | 3.0767 | 7698   | 1757   | 0.962  |
| 2 | 9  | 4.4567 | 792556 | 131448 | 99.038 |

Supplementary Figure 18.  $^1\text{H}$ ,  $^{13}\text{C}$ -NMR and SFC spectra of product 3ck

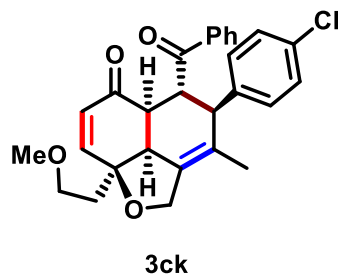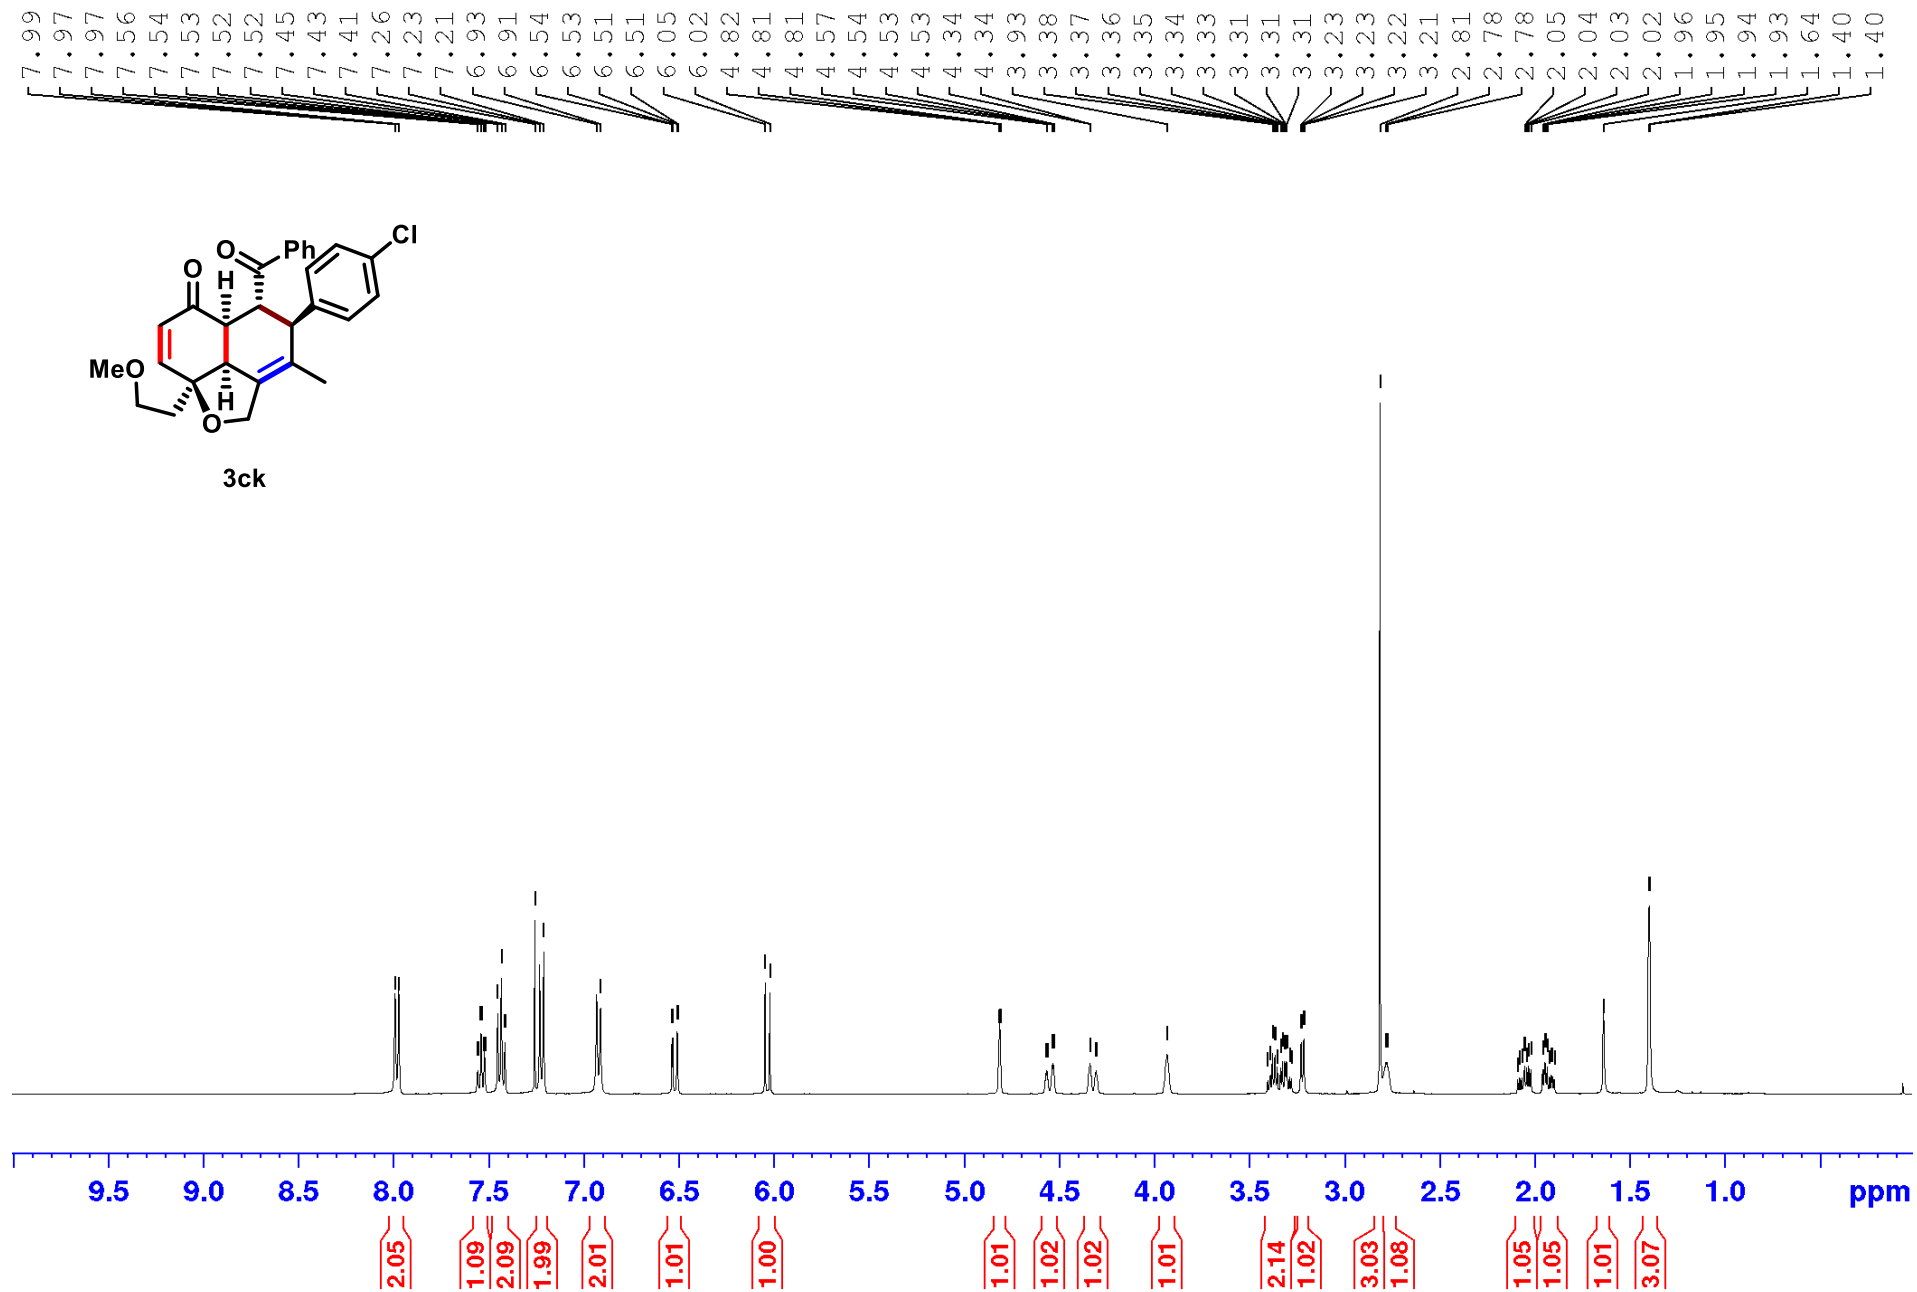

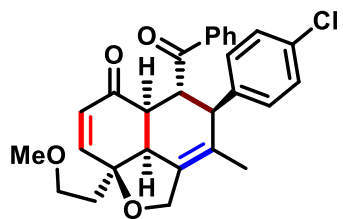

3ck

— 200.83  
— 195.80

— 150.39  
— 142.25  
— 135.03  
— 134.57  
— 133.31  
— 132.26  
— 130.54  
— 129.21  
— 128.83  
— 128.74  
— 128.45  
— 125.62

— 82.15  
— 77.32  
— 77.00  
— 76.68  
— 68.19  
— 67.80

— 57.95

— 49.60  
— 43.83  
— 43.21  
— 42.51  
— 38.04

— 18.08

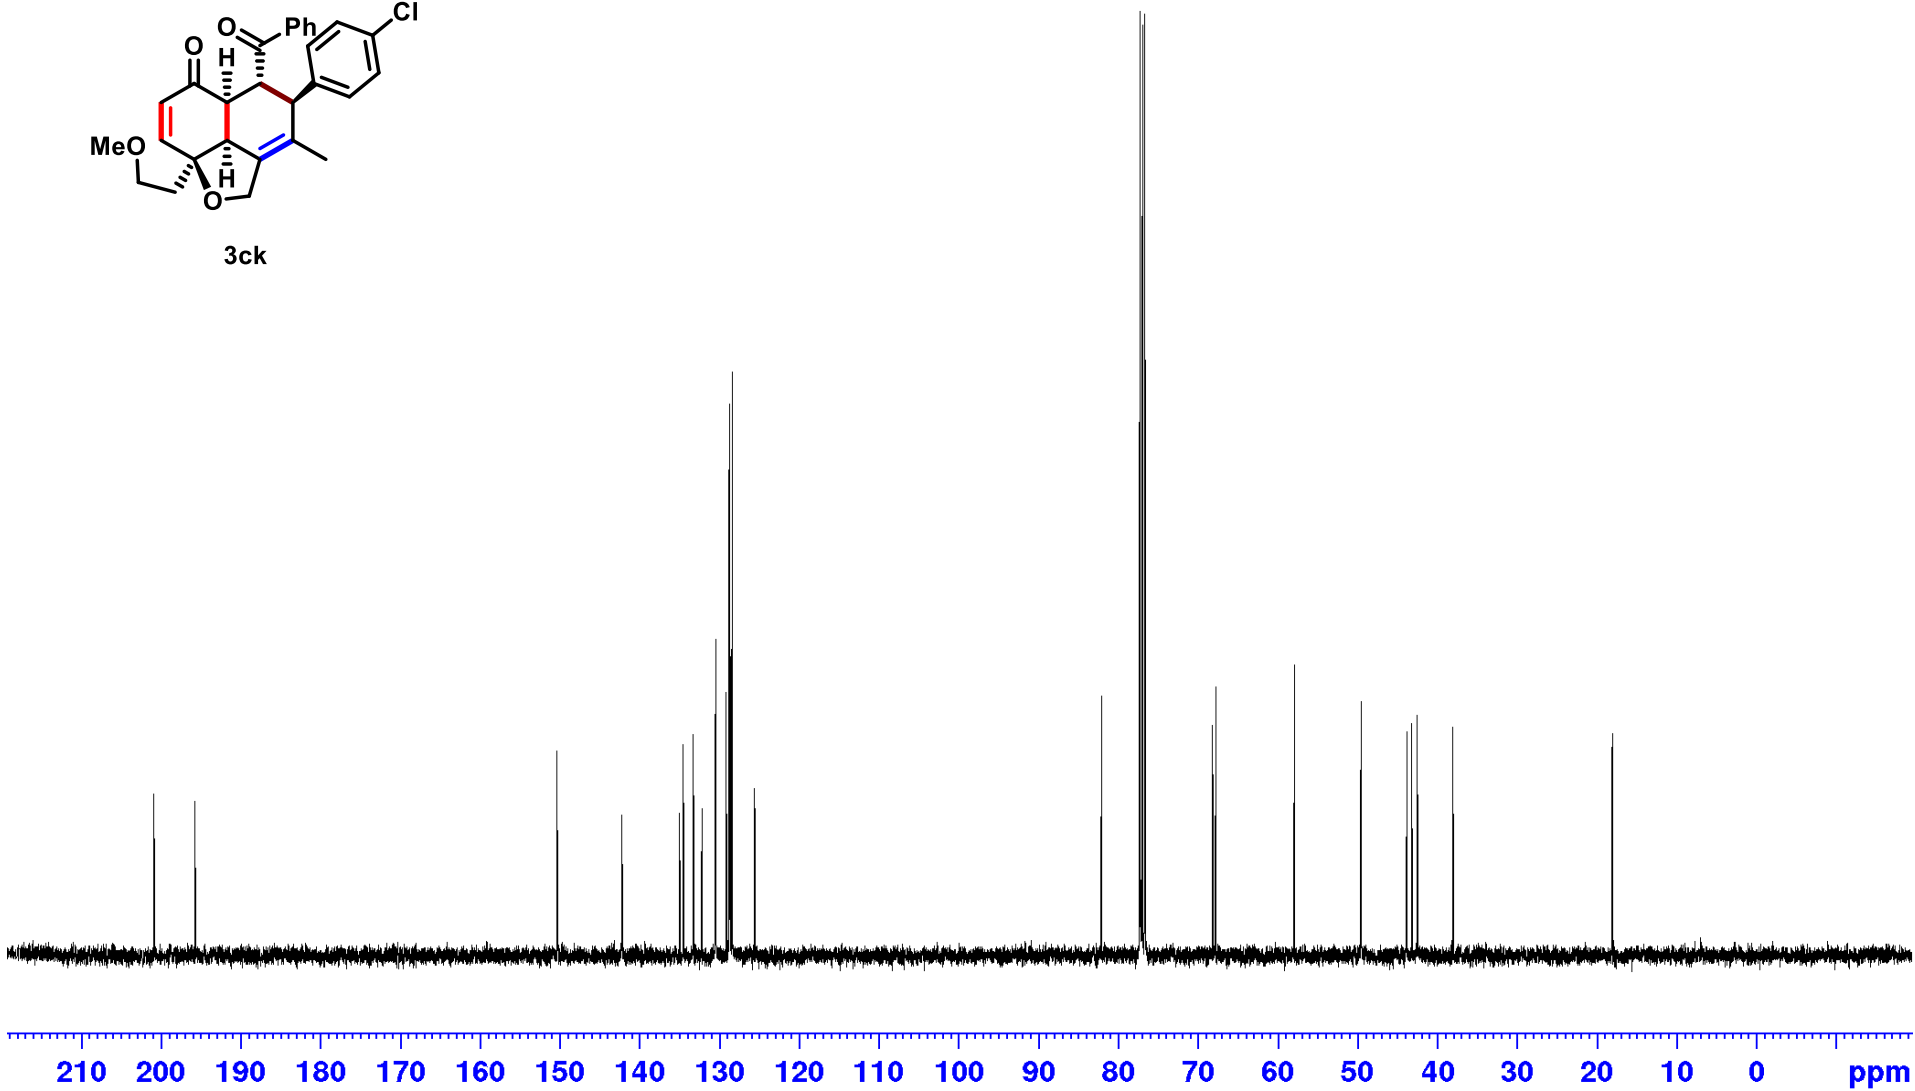



**Chiral Separation** (SFC): Chiralpak IA; Flow (CO<sub>2</sub>) = 2.4 mL/min; Flow (isopropanol) = 0.6 mL/min;  
 T = 40 °C; λ = 250 nm; Back pressure = 15 Mpa

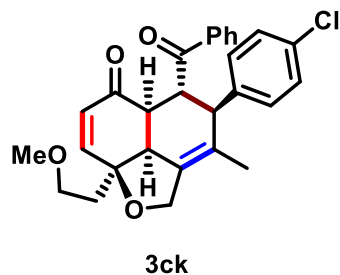

98% ee

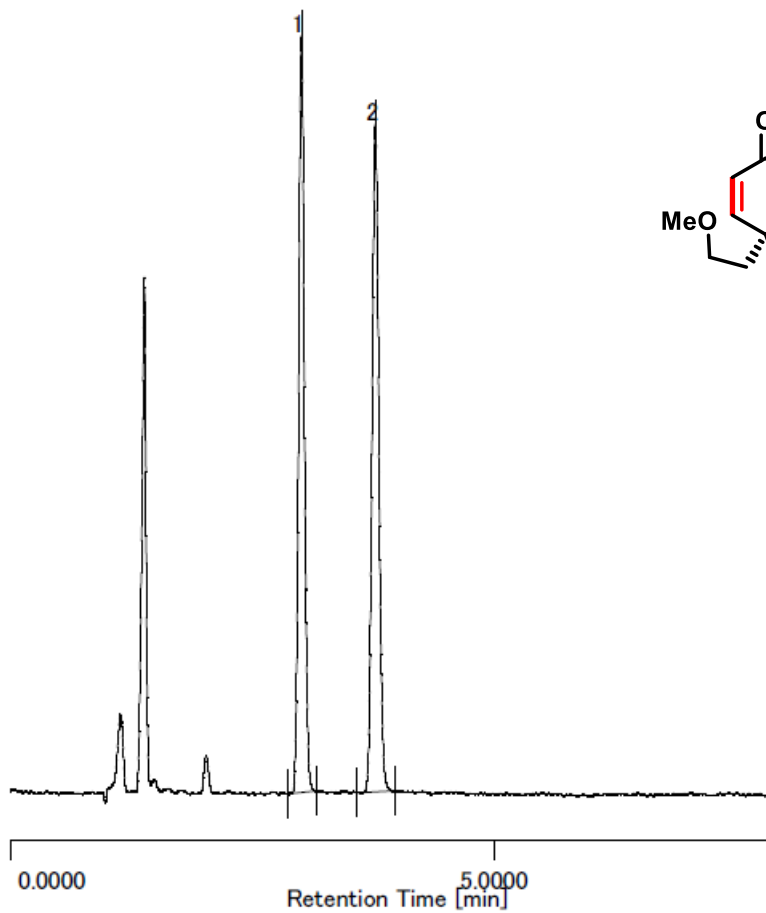

ChromatogramName R-722-rac.OMe-ethyl-dienone+p-Cl-chalcone

| # | CH | tR     | Area    | Height  | Area%  |
|---|----|--------|---------|---------|--------|
| 1 | 10 | 3.0067 | 4359775 | 1071314 | 48.999 |
| 2 | 10 | 3.7700 | 4537921 | 945607  | 51.001 |

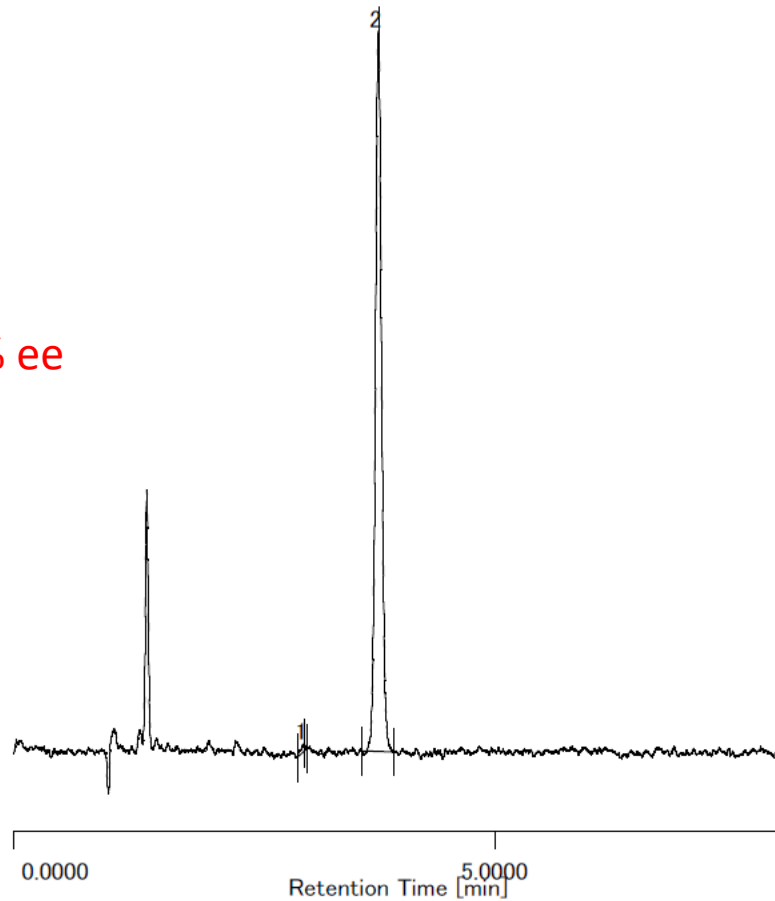

ChromatogramName R-725-Chiral-OMe-ethyl-dienone+p-Cl-chalcone

| # | CH | tR     | Area    | Height | Area%  |
|---|----|--------|---------|--------|--------|
| 1 | 9  | 3.0167 | 10187   | 2924   | 0.839  |
| 2 | 9  | 3.7883 | 1203730 | 272592 | 99.161 |



201.96  
196.03

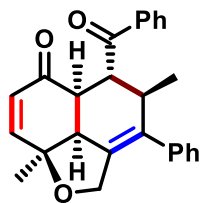

3de

151.85  
140.07  
135.53  
134.78  
134.24  
133.30  
128.94  
128.54  
128.33  
128.25  
127.59  
126.84

80.02  
77.30  
76.99  
76.67  
68.48

47.77  
44.14  
42.09

33.16

23.87  
21.25

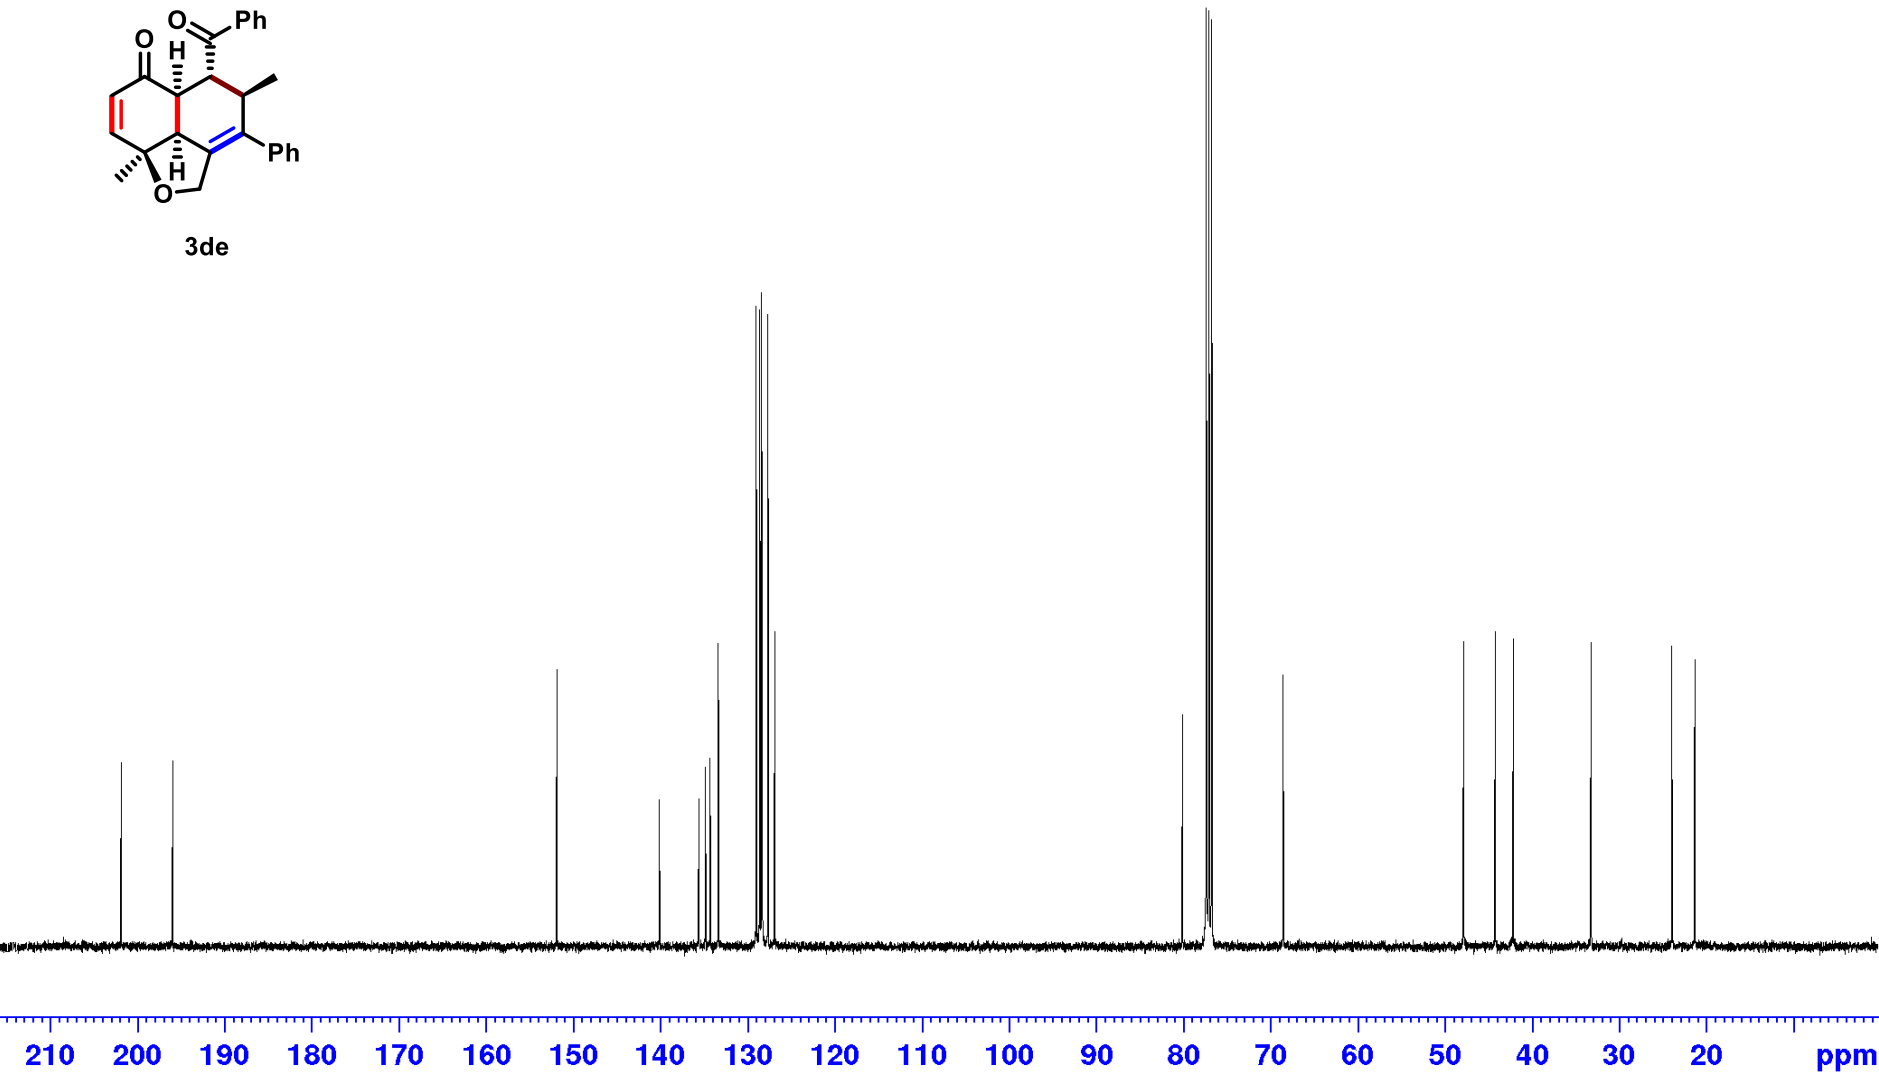

**Chiral Separation** (SFC): Chiralpak IA; Flow (CO<sub>2</sub>) = 3.0 mL/min; Flow (isopropanol) = 0.3 mL/min;  
 T = 25 °C; λ = 250 nm; Back pressure = 15 Mpa

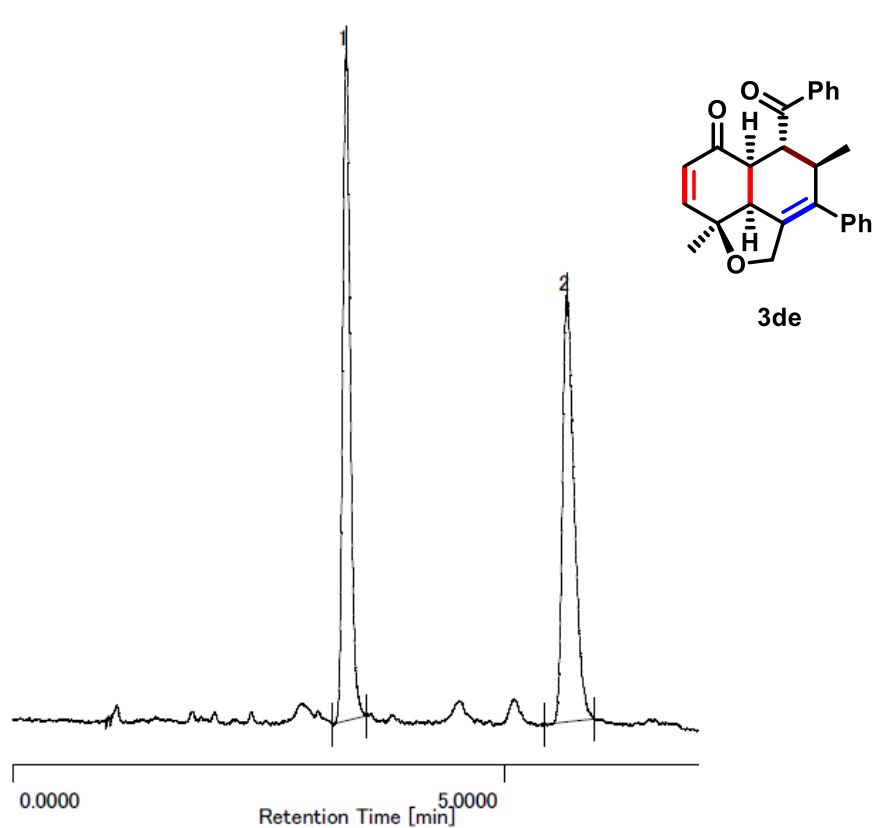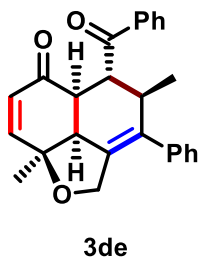

99% ee

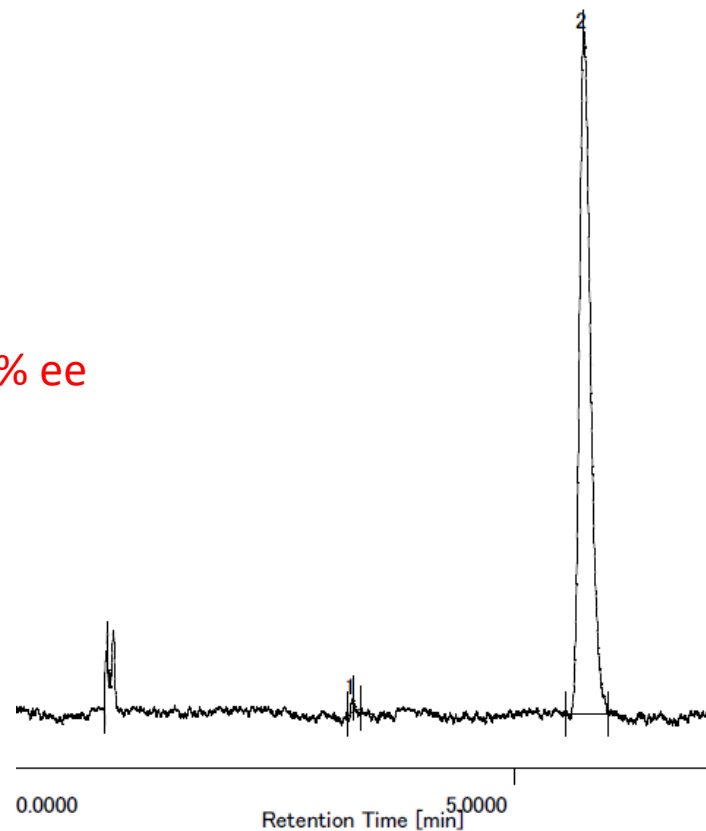

ChromatogramName E-632-rac-Ph-dienone+PPK

| # | CH | tR     | Area    | Height | Area%  |
|---|----|--------|---------|--------|--------|
| 1 | 9  | 3.3883 | 1073578 | 201812 | 50.484 |
| 2 | 9  | 5.6283 | 1052997 | 128546 | 49.516 |

ChromatogramName R-659rr-chir-Ph-dienone+PPK-fr1

| # | CH | tR     | Area   | Height | Area%  |
|---|----|--------|--------|--------|--------|
| 1 | 9  | 3.4033 | 2340   | 1119   | 0.543  |
| 2 | 9  | 5.6800 | 428426 | 55855  | 99.457 |

Supplementary Figure 20.  $^1\text{H}$ ,  $^{13}\text{C}$ -NMR and SFC spectra of product 3ac

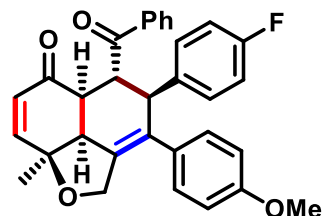

3ec

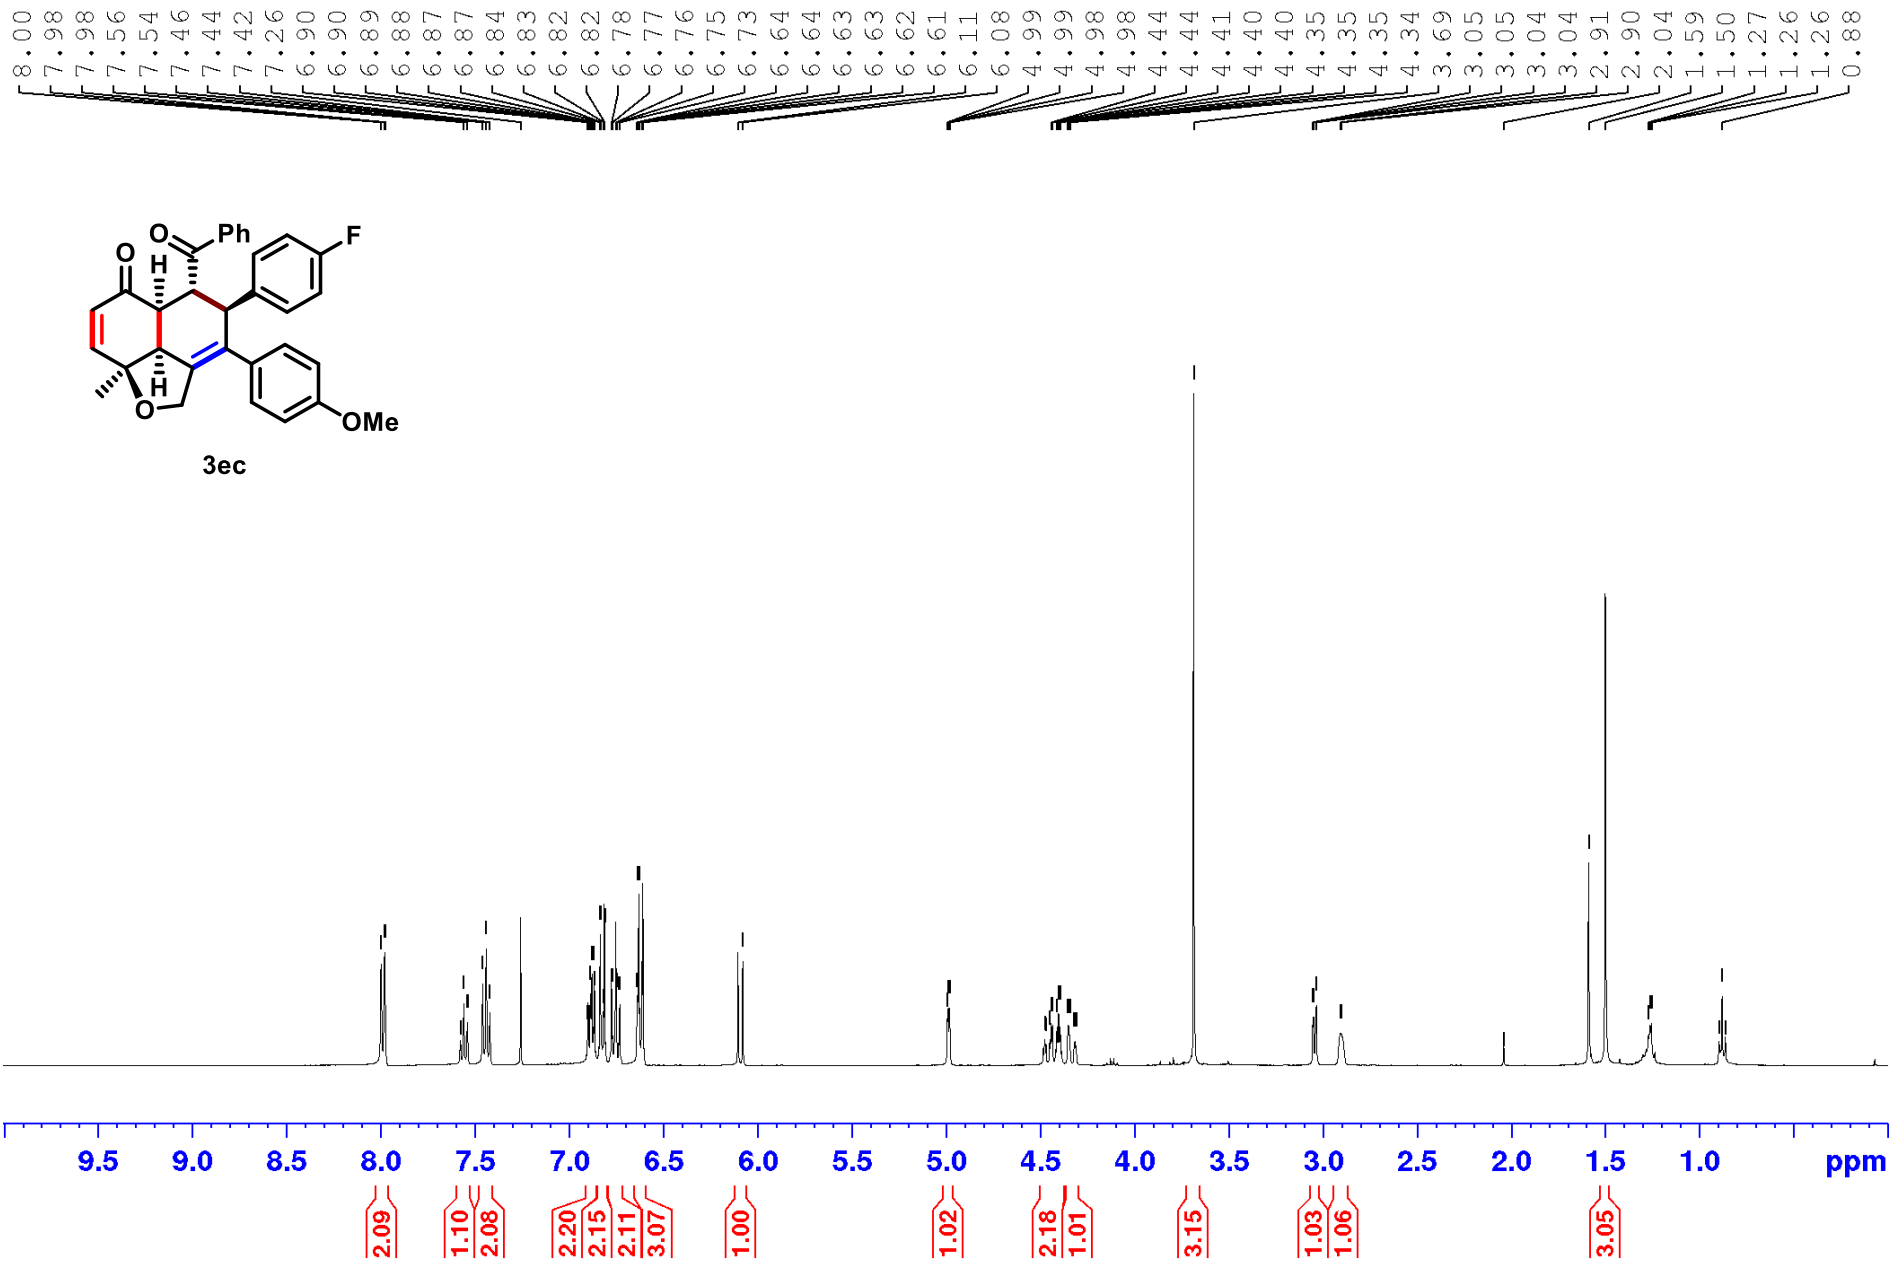



**Chiral Separation** (SFC): Chiralpak IA; Flow (CO<sub>2</sub>) = 2.4 mL/min; Flow (isopropanol) = 0.6 mL/min;  
 T = 40 °C; λ = 250 nm; Back pressure = 15 Mpa

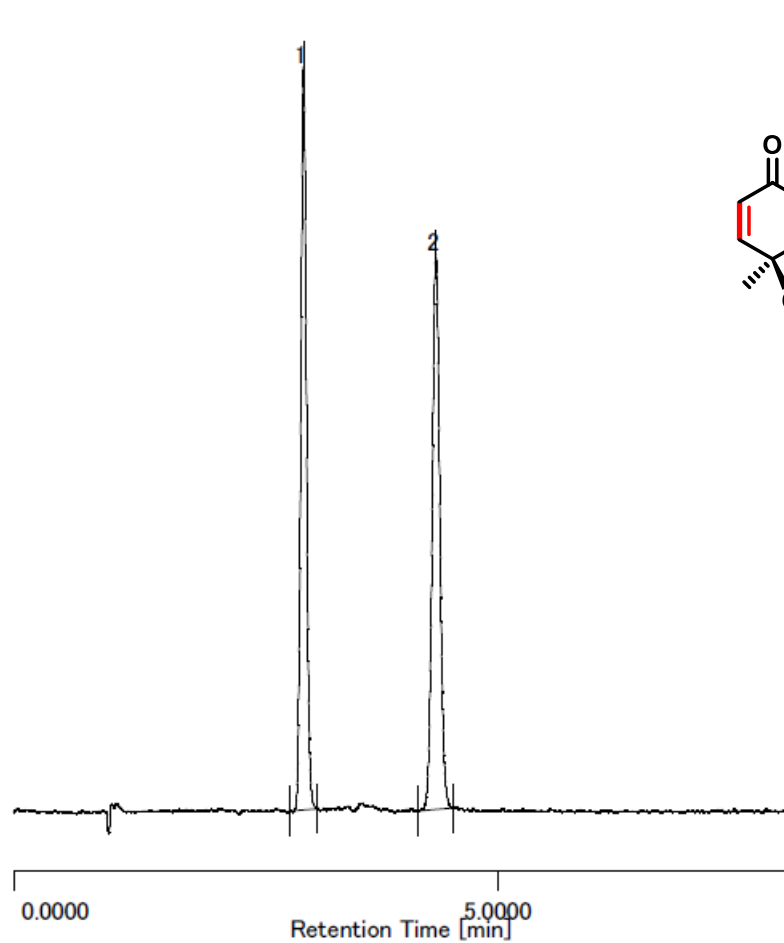

ChromatogramName R-723-rac.dienone-p-OMe-aryl-yne+p-F-chalcone

| # | CH | tR     | Area    | Height | Area%  |
|---|----|--------|---------|--------|--------|
| 1 | 9  | 2.9917 | 2826067 | 717767 | 49.073 |
| 2 | 9  | 4.3583 | 2932789 | 536083 | 50.927 |

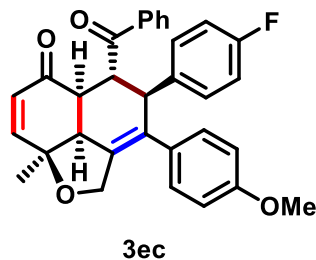

98% ee

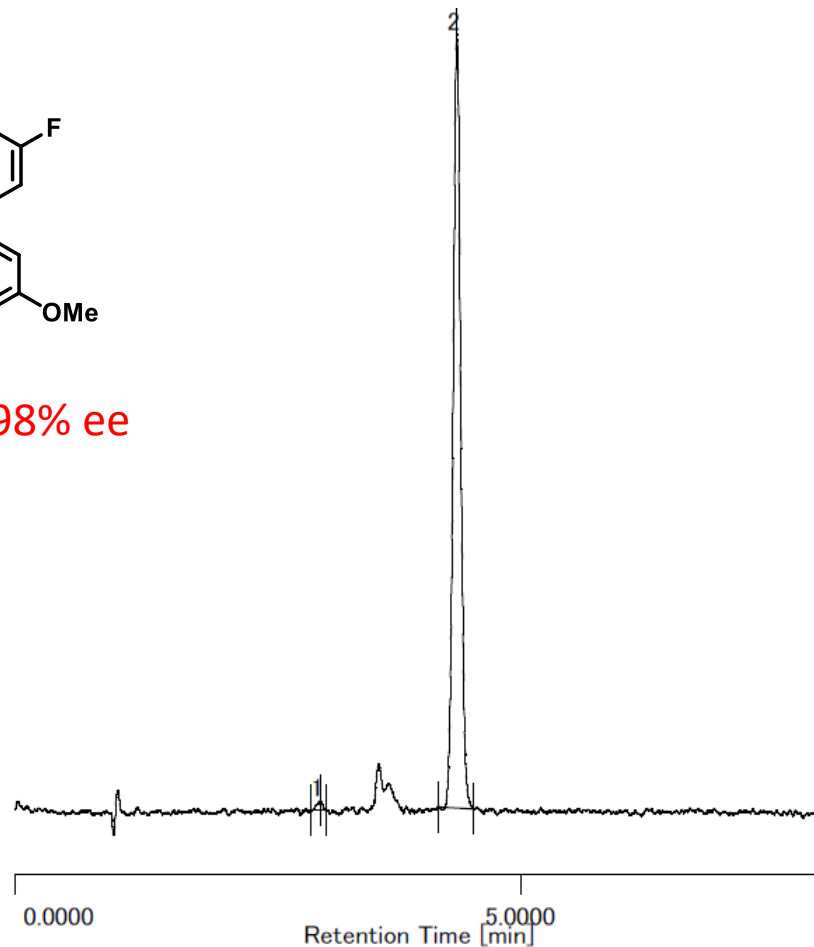

ChromatogramName R-726-Chiral-dienone-p-OMe-aryl-yne+p-F-chalcone

| # | CH | tR     | Area    | Height | Area%  |
|---|----|--------|---------|--------|--------|
| 1 | 10 | 3.0200 | 20171   | 5329   | 0.946  |
| 2 | 10 | 4.3683 | 2111457 | 412793 | 99.054 |

Supplementary Figure 21.  $^1\text{H}$ ,  $^{13}\text{C}$ -NMR and SFC spectra of product 3ek

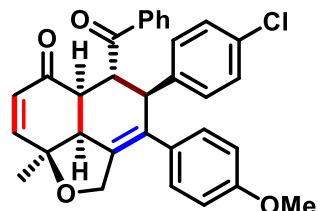

8.00  
7.98  
7.58  
7.56  
7.55  
7.46  
7.44  
7.43  
7.26  
7.05  
7.03  
6.87  
6.85  
6.85  
6.83  
6.64  
6.62  
6.11  
6.08  
4.97  
4.97  
4.96  
4.50  
4.49  
4.49  
4.47  
4.46  
4.45  
4.43  
4.42  
4.41  
4.35  
4.35  
4.35  
4.32  
4.31  
3.69  
3.05  
3.03  
2.88  
— 2.04  
1.63  
1.63  
1.49  
1.27  
1.25

9.5 9.0 8.5 8.0 7.5 7.0 6.5 6.0 5.5 5.0 4.5 4.0 3.5 3.0 2.5 2.0 1.5 1.0 ppm

2.01  
1.02  
2.01  
2.04  
4.10  
3.03  
1.00  
1.01  
0.97  
1.07  
1.01  
3.00  
1.02  
1.02  
3.03



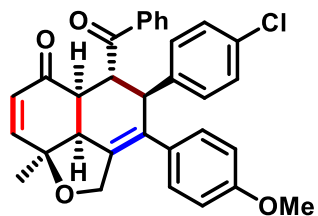

3ek

— 200.96  
— 195.20

— 157.95  
— 151.43  
142.04  
137.29  
135.11  
133.52  
131.83  
131.53  
131.41  
130.70  
128.97  
128.89  
128.81  
128.57  
128.17  
— 113.31

80.04  
77.30  
76.98  
76.67  
— 68.74

— 54.97  
— 49.99  
45.18  
43.85  
43.67

— 23.73

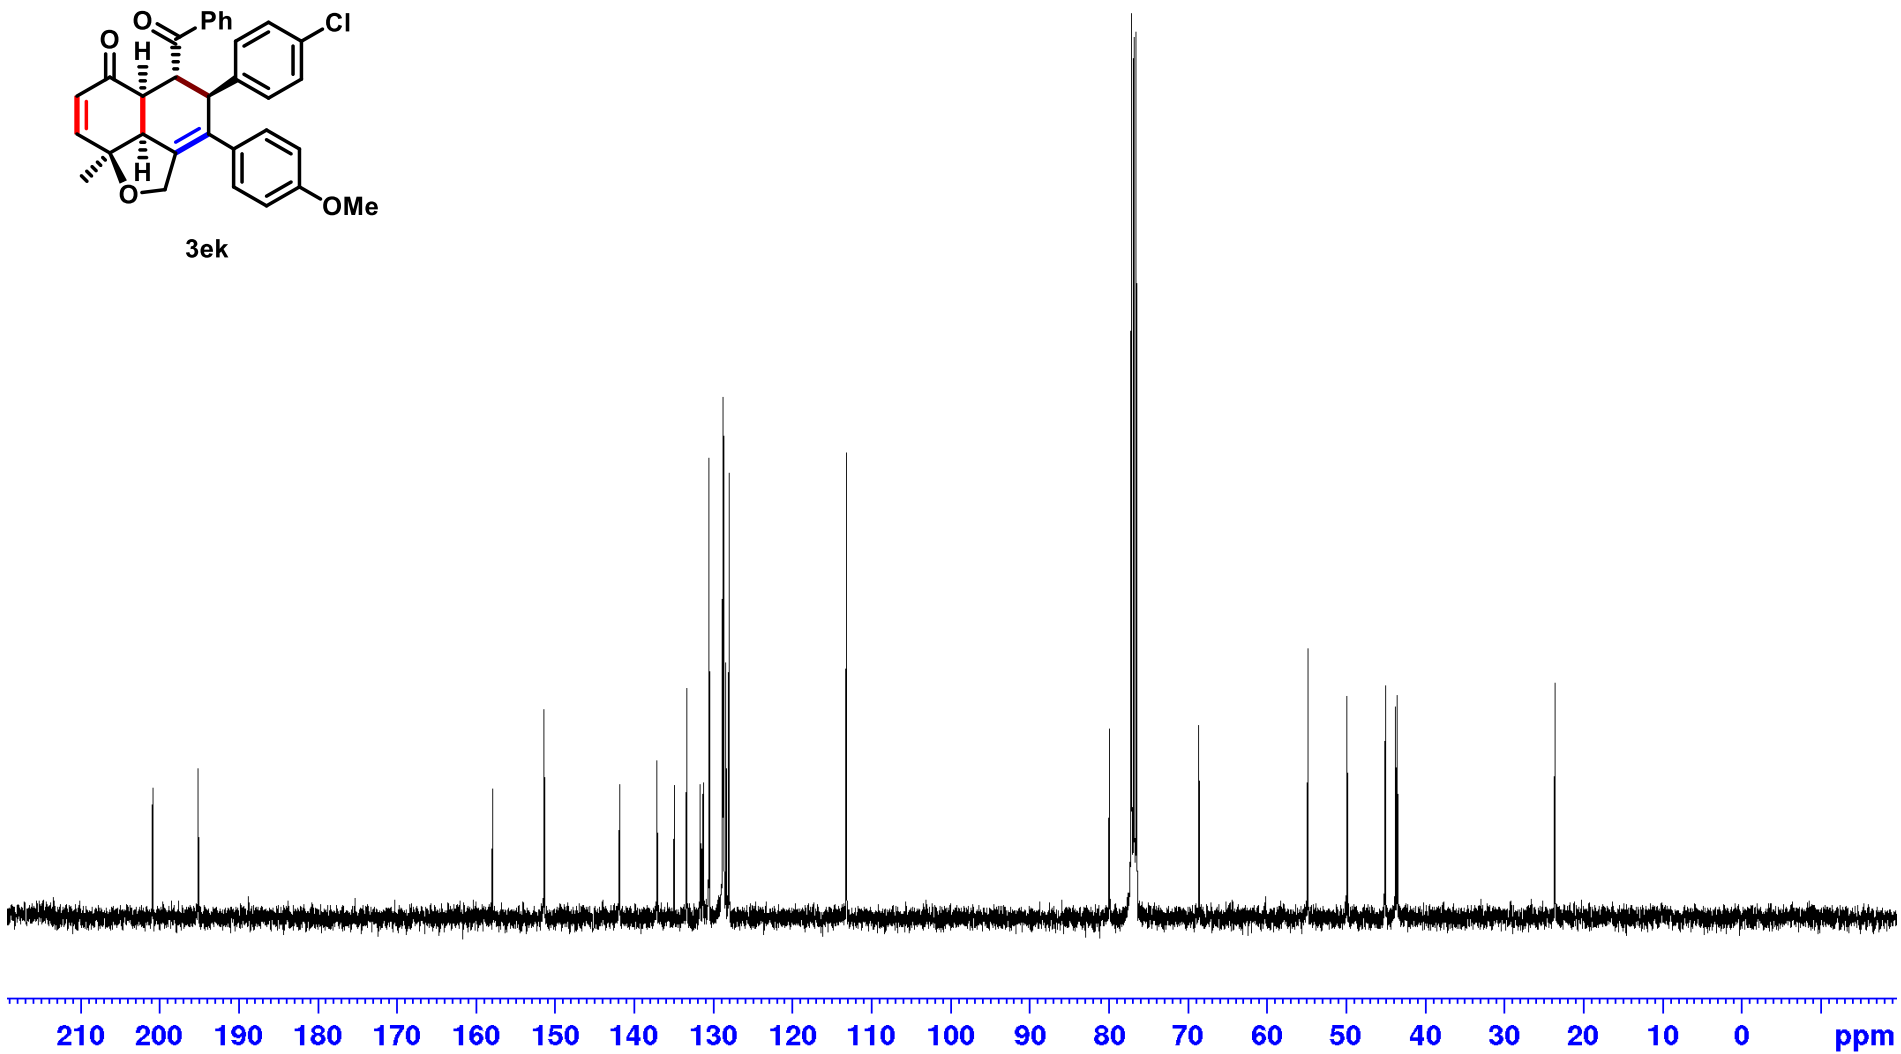

**Chiral Separation** (SFC): Chiralpak IA; Flow (CO<sub>2</sub>) = 2.4 mL/min; Flow (isopropanol) = 0.6 mL/min;  
 T = 40 °C; λ = 250 nm; Back pressure = 15 Mpa

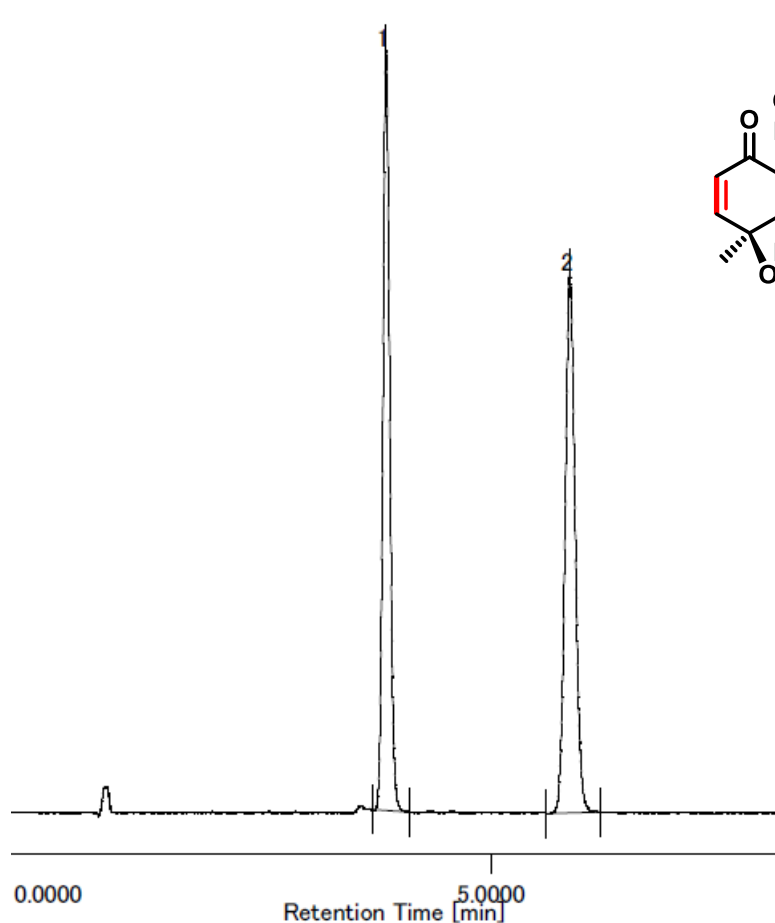

ChromatogramName R-733-rac.dienone-p-OMe-aryl-yne+p-Cl-chalcone

| # | CH | tR     | Area    | Height | Area%  |
|---|----|--------|---------|--------|--------|
| 1 | 9  | 3.9150 | 4509356 | 925913 | 48.951 |
| 2 | 9  | 5.8083 | 4702578 | 656560 | 51.049 |

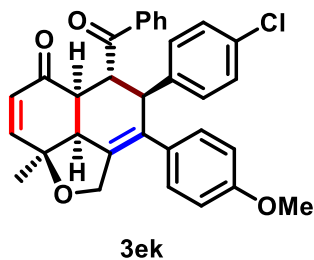

99% ee

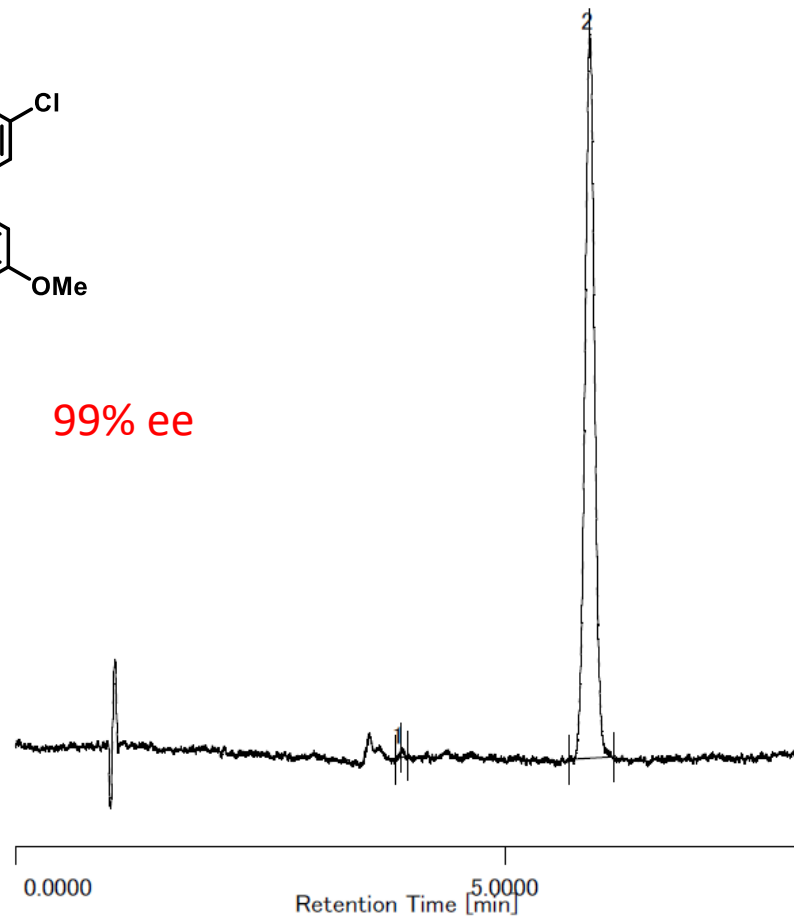

ChromatogramName R-734-chiral-dienone-p-OMe-aryl-yne+p-Cl-chalcone

| # | CH | tR     | Area   | Height | Area%  |
|---|----|--------|--------|--------|--------|
| 1 | 9  | 3.9383 | 1628   | 698    | 0.430  |
| 2 | 9  | 5.8667 | 376918 | 55122  | 99.570 |

Supplementary Figure 22.  $^1\text{H}$ ,  $^{13}\text{C}$ -NMR and SFC spectra of product 3fc

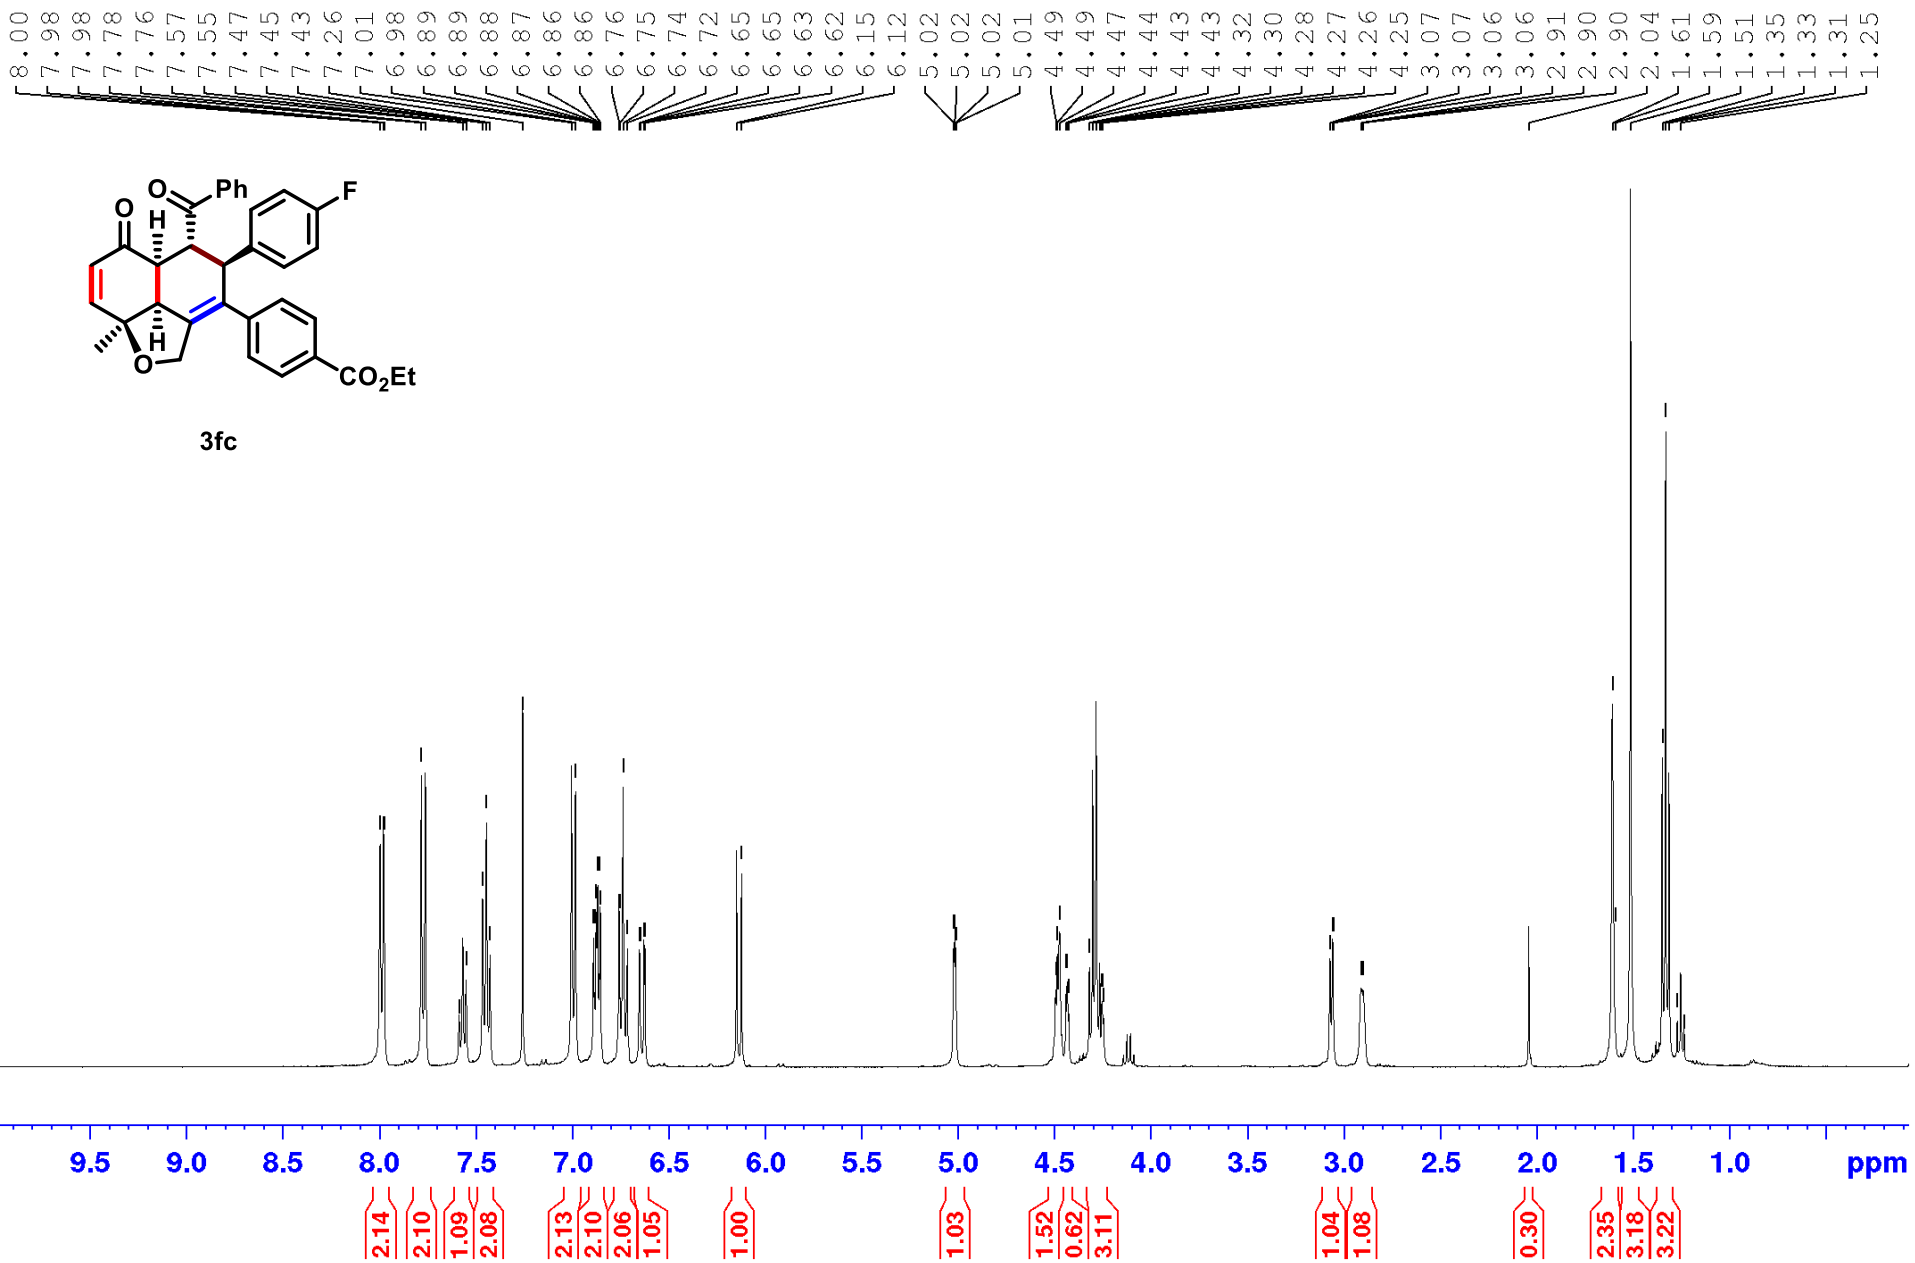

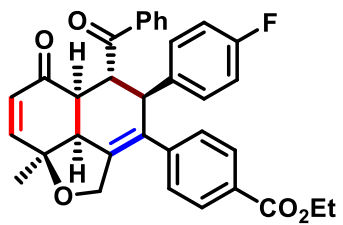

3fc

— 200.98  
— 195.13

— 166.19

— 151.23  
— 144.09  
— 138.92  
— 138.60  
— 135.07  
— 133.63  
— 131.76  
— 130.83  
— 130.75  
— 129.22  
— 128.93  
— 128.86  
— 128.75  
— 128.66  
— 127.89  
— 115.15  
— 114.94

— 80.19  
— 77.32  
— 77.00  
— 76.68

— 68.48

— 60.90

— 49.84  
— 45.38  
— 43.87  
— 43.48

— 23.66

— 14.26

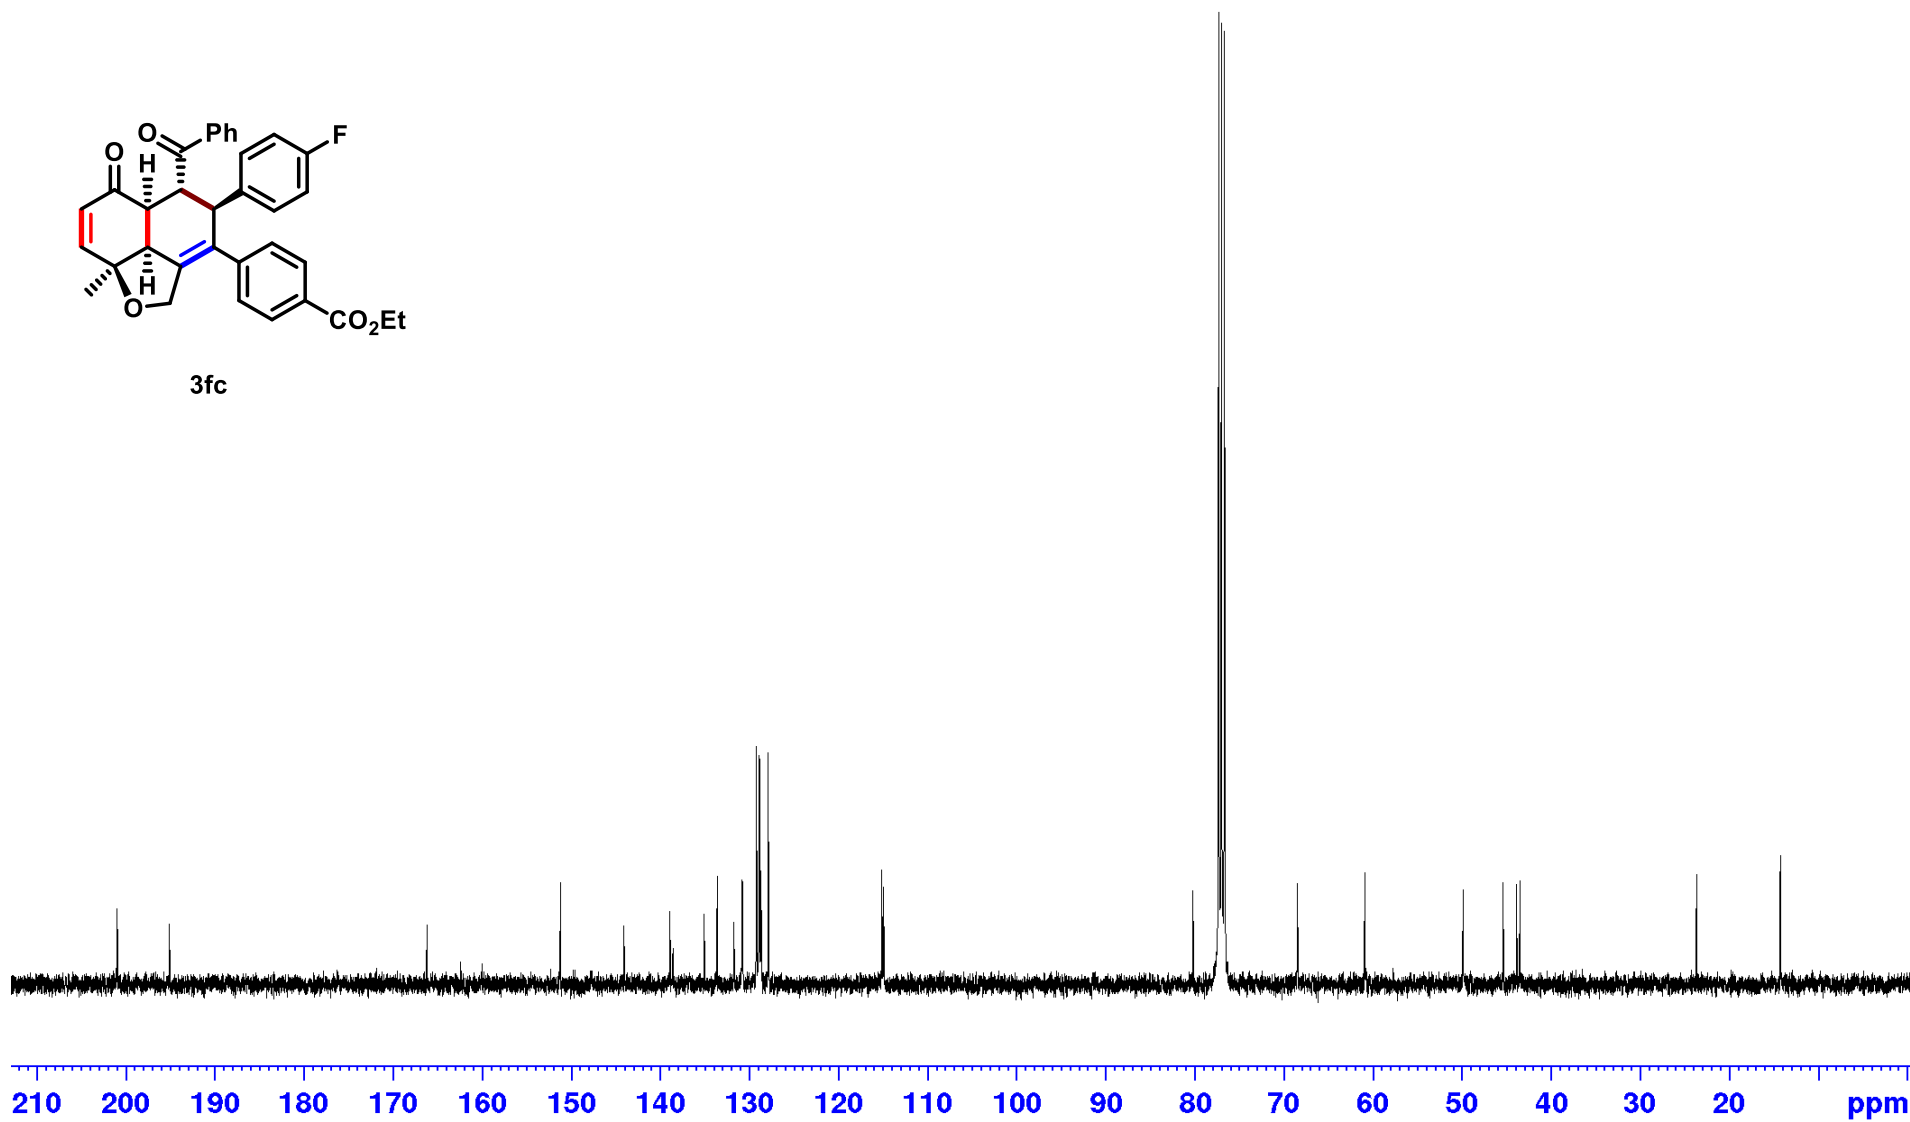

**Chiral Separation** (SFC): Chiralpak IA; Flow (CO<sub>2</sub>) = 2.4 mL/min; Flow (isopropanol) = 0.6 mL/min;  
 T = 40 °C; λ = 250 nm; Back pressure = 15 Mpa

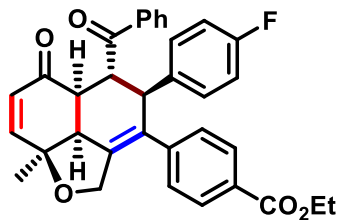

3fc

98% ee

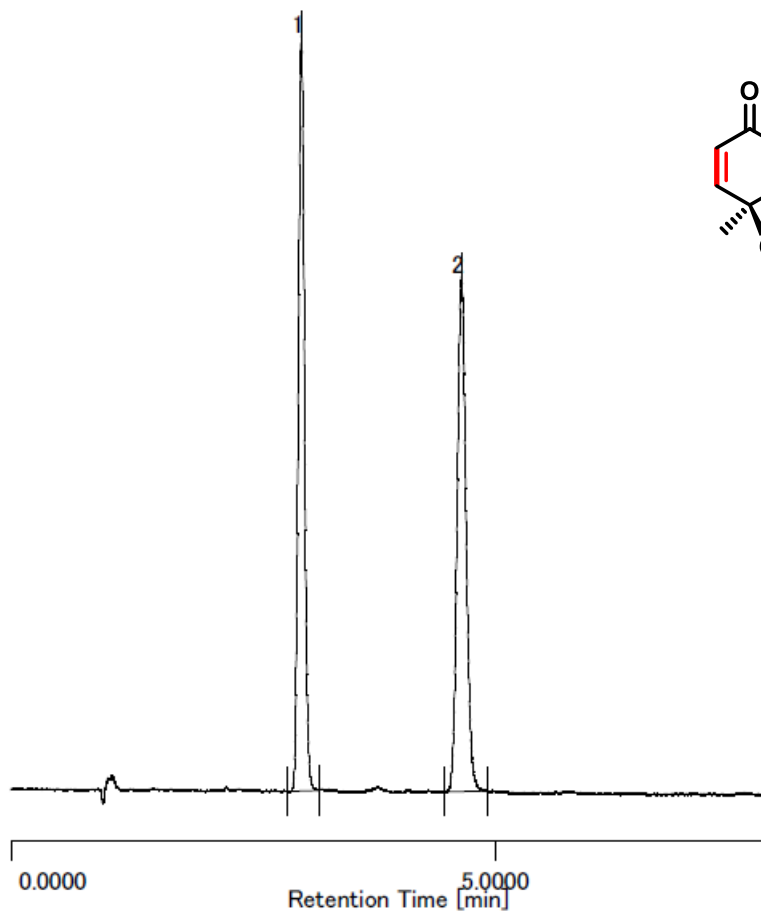

ChromatogramName R-737-rac.dienone-p-Ester-aryl-yne+p-F-chalcone

| # | CH | tR     | Area    | Height | Area%  |
|---|----|--------|---------|--------|--------|
| 1 | 9  | 2.9950 | 1020592 | 235813 | 49.980 |
| 2 | 9  | 4.6467 | 1021394 | 160901 | 50.020 |

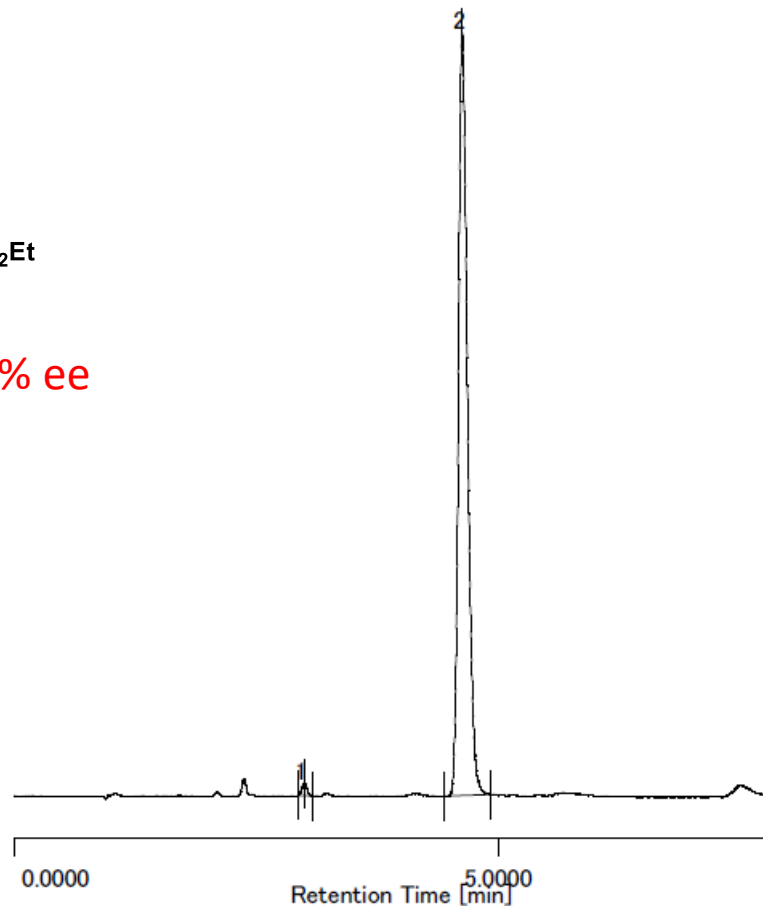

ChromatogramName R-739-Chiral-dienone-p-Ester-aryl-yne+p-F-chalcone

| # | CH | tR     | Area    | Height  | Area%  |
|---|----|--------|---------|---------|--------|
| 1 | 9  | 2.9967 | 83254   | 21734   | 0.991  |
| 2 | 9  | 4.6233 | 8315369 | 1292170 | 99.009 |

# Supplementary Figure 23. $^1\text{H}$ , $^{13}\text{C}$ -NMR and SFC spectra of product 3ge

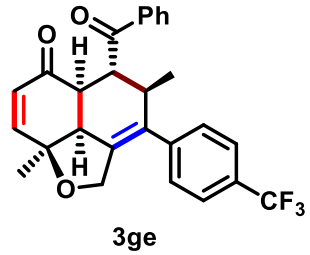

8.09  
8.07  
8.07  
7.64  
7.62  
7.60  
7.57  
7.55  
7.54  
7.52  
7.51  
7.26  
7.20  
7.18  
6.61  
6.60  
6.58  
6.58  
6.05  
6.02

4.75  
4.74  
4.74  
4.24  
4.21  
4.20  
4.20  
4.19  
4.19  
4.18  
4.18  
3.07  
3.07  
3.06  
3.06  
3.05  
3.04  
3.03  
3.03  
2.83  
2.82  
2.82  
2.81  
2.04  
1.62  
1.60  
1.45  
1.25

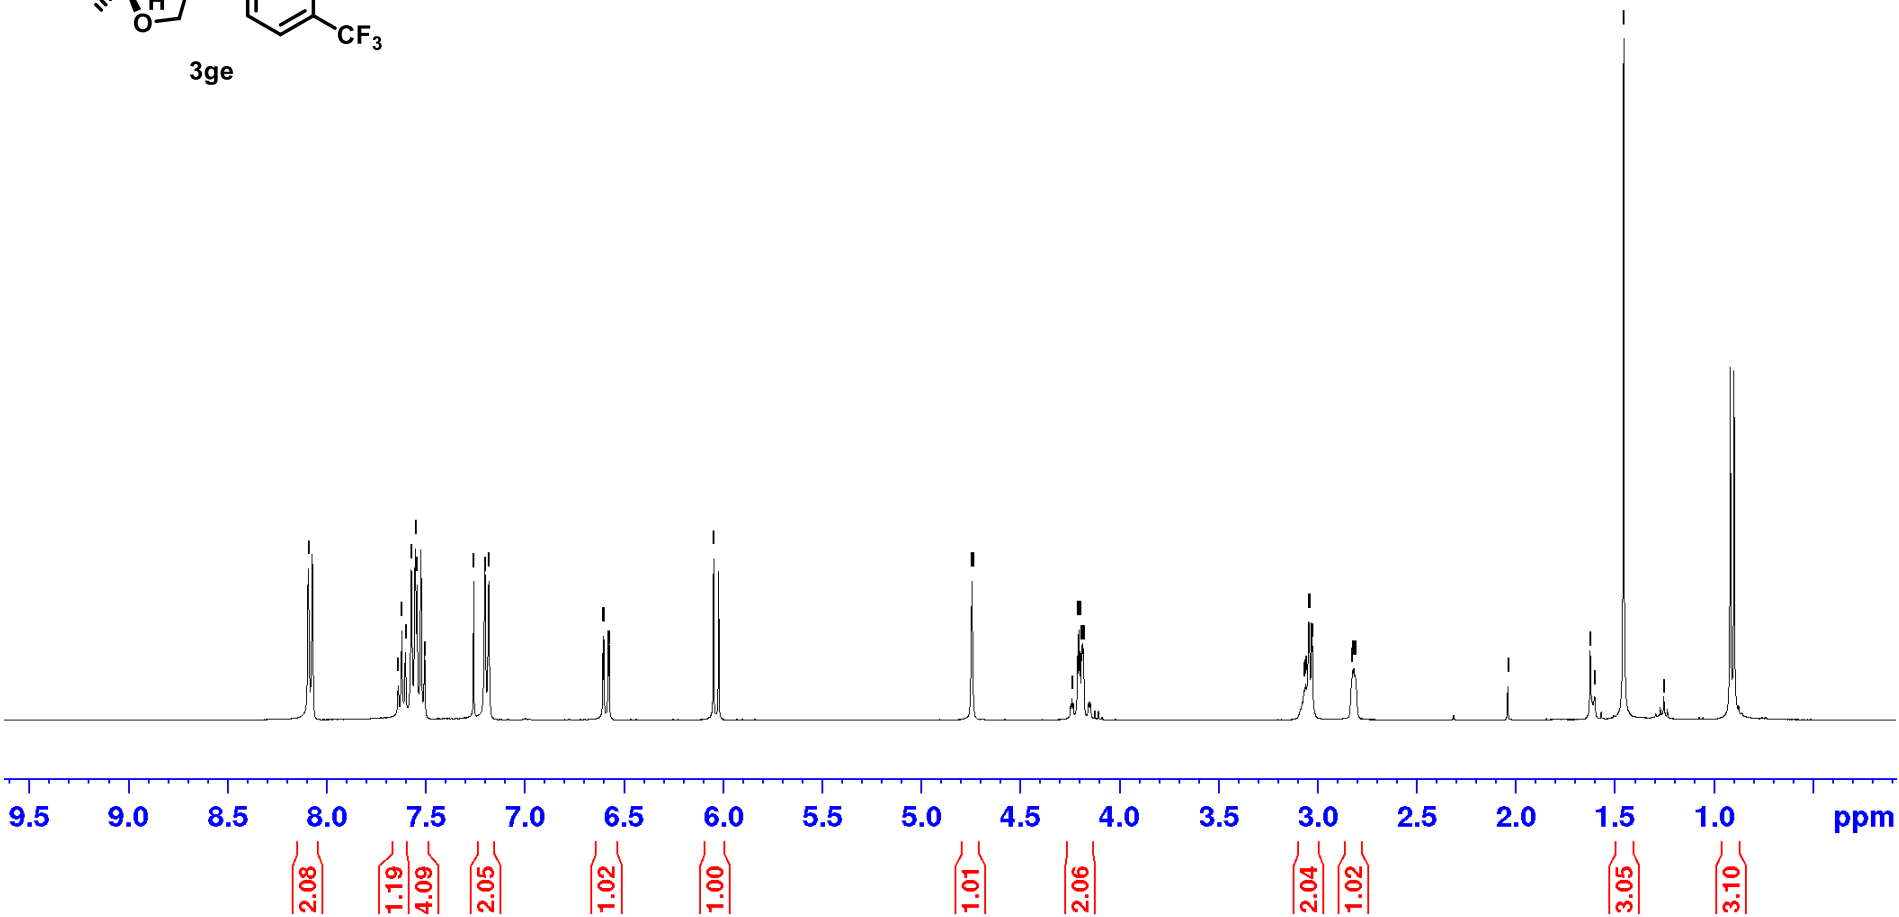

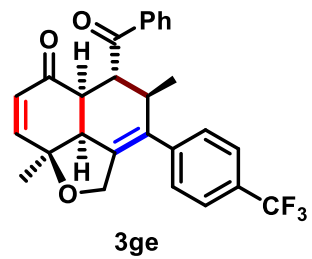

— 201.70  
— 195.62

— 151.70  
— 143.82  
— 135.41  
— 135.26  
— 133.69  
— 133.39  
— 128.95  
— 128.49  
— 128.25  
— 128.00  
— 125.37  
— 125.33

— 80.03  
— 77.24  
— 76.92  
— 76.60  
— 68.19

— 47.55  
— 44.16  
— 42.00

— 32.89

— 23.76  
— 21.08

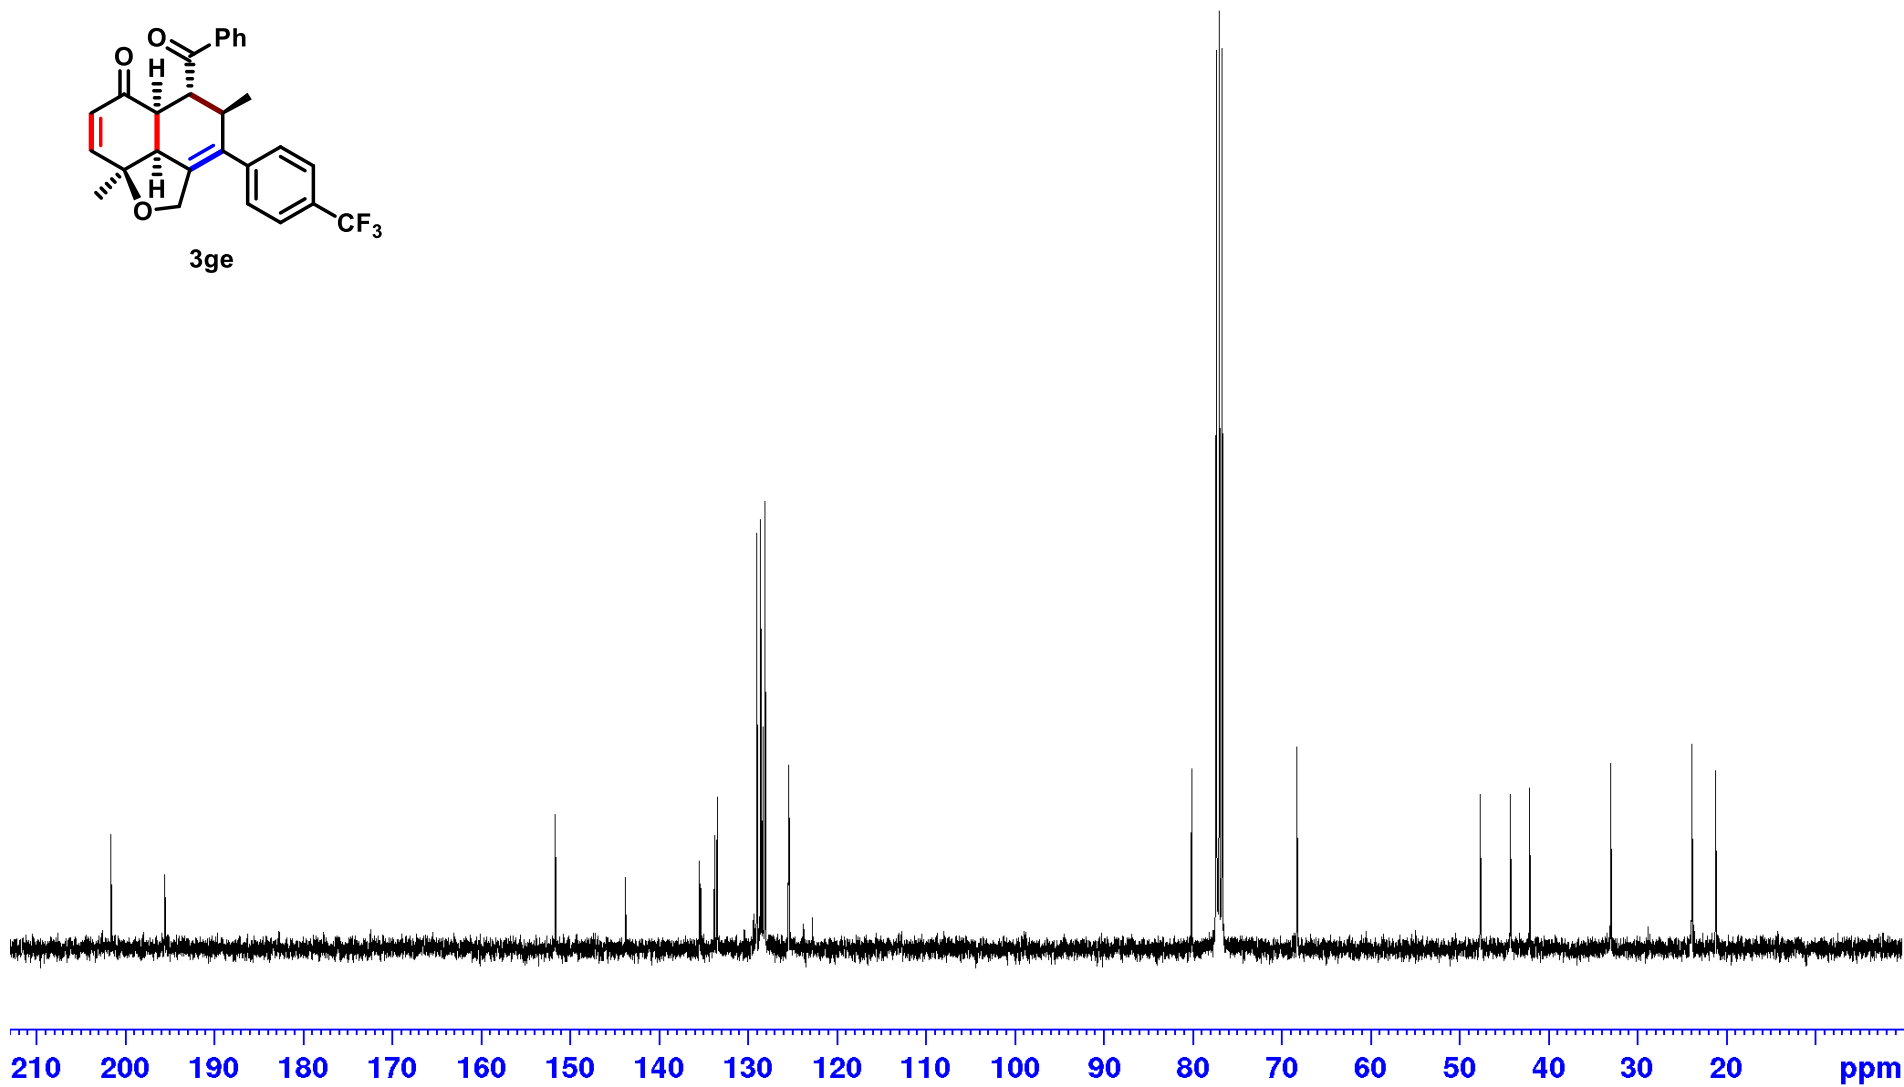

**Chiral Separation** (SFC): Chiralpak IA; Flow (CO<sub>2</sub>) = 3.0 mL/min; Flow (isopropanol) = 0.3 mL/min;  
 T = 40 °C; λ = 250 nm; Back pressure = 15 Mpa

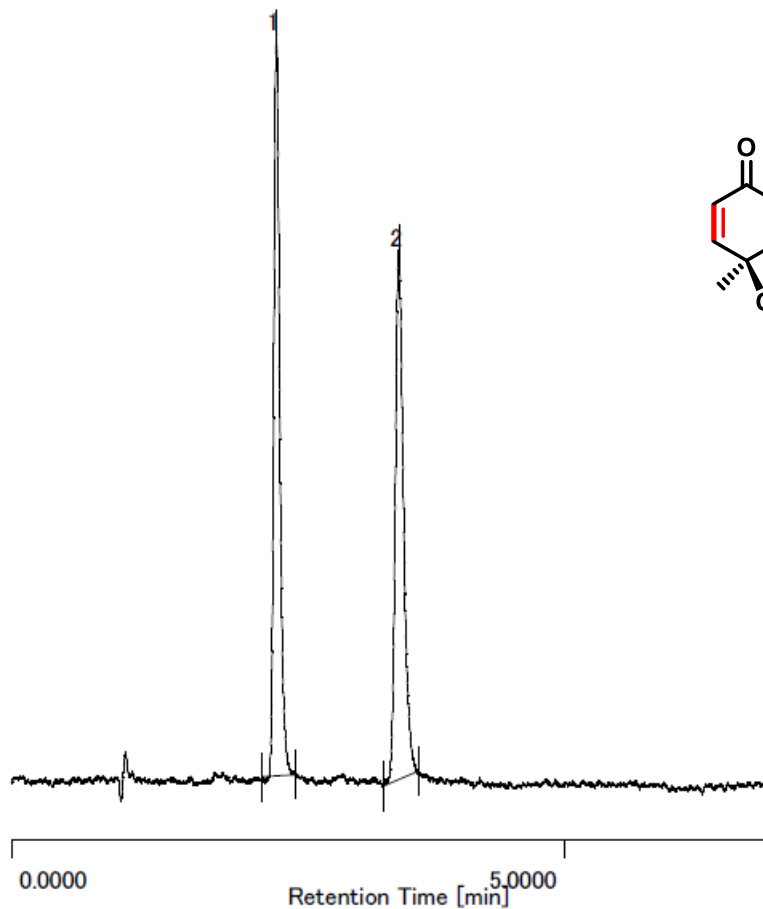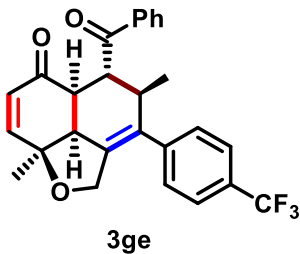

96% ee

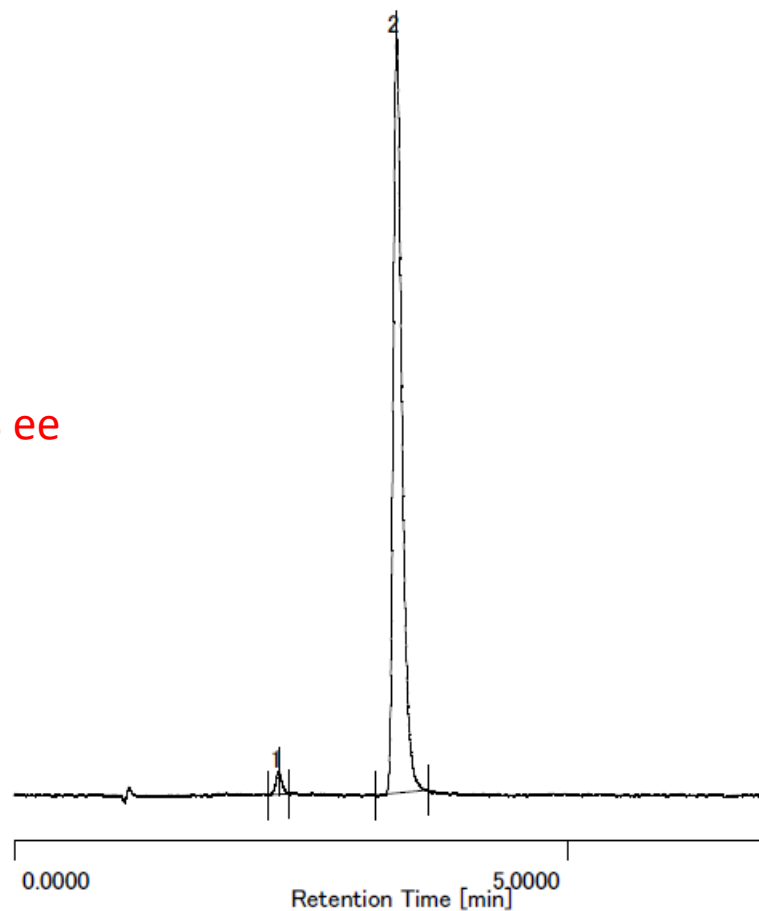

ChromatogramName R-751-rac-p-CF3-Ph-dienone+PPK

| # | CH | tR     | Area   | Height | Area%  |
|---|----|--------|--------|--------|--------|
| 1 | 9  | 2.3933 | 373619 | 101107 | 49.853 |
| 2 | 9  | 3.5000 | 375816 | 72261  | 50.147 |

ChromatogramName R-754-chir-p-CF3-Ph-dienone+PPK

| # | CH | tR     | Area    | Height | Area%  |
|---|----|--------|---------|--------|--------|
| 1 | 9  | 2.3900 | 40185   | 10505  | 2.073  |
| 2 | 9  | 3.4517 | 1898002 | 345869 | 97.927 |



# Supplementary Figure 24. $^1\text{H}$ , $^{13}\text{C}$ -NMR and SFC spectra of product 3he

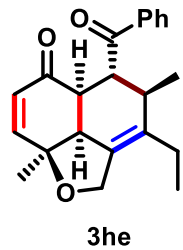

8.04  
8.02  
8.02  
7.60  
7.58  
7.56  
7.51  
7.49  
7.47  
7.26  
6.53  
6.52  
6.50  
6.50  
5.91  
5.89

4.58  
4.52  
4.49  
4.27  
4.24  
2.93  
2.93  
2.92  
2.91  
2.77  
2.76  
2.75  
2.73  
2.70  
2.06  
2.04  
2.02  
2.01  
1.92  
1.90  
1.88  
1.87  
1.67  
1.66  
1.51  
1.40  
1.11  
1.09  
0.98  
0.96

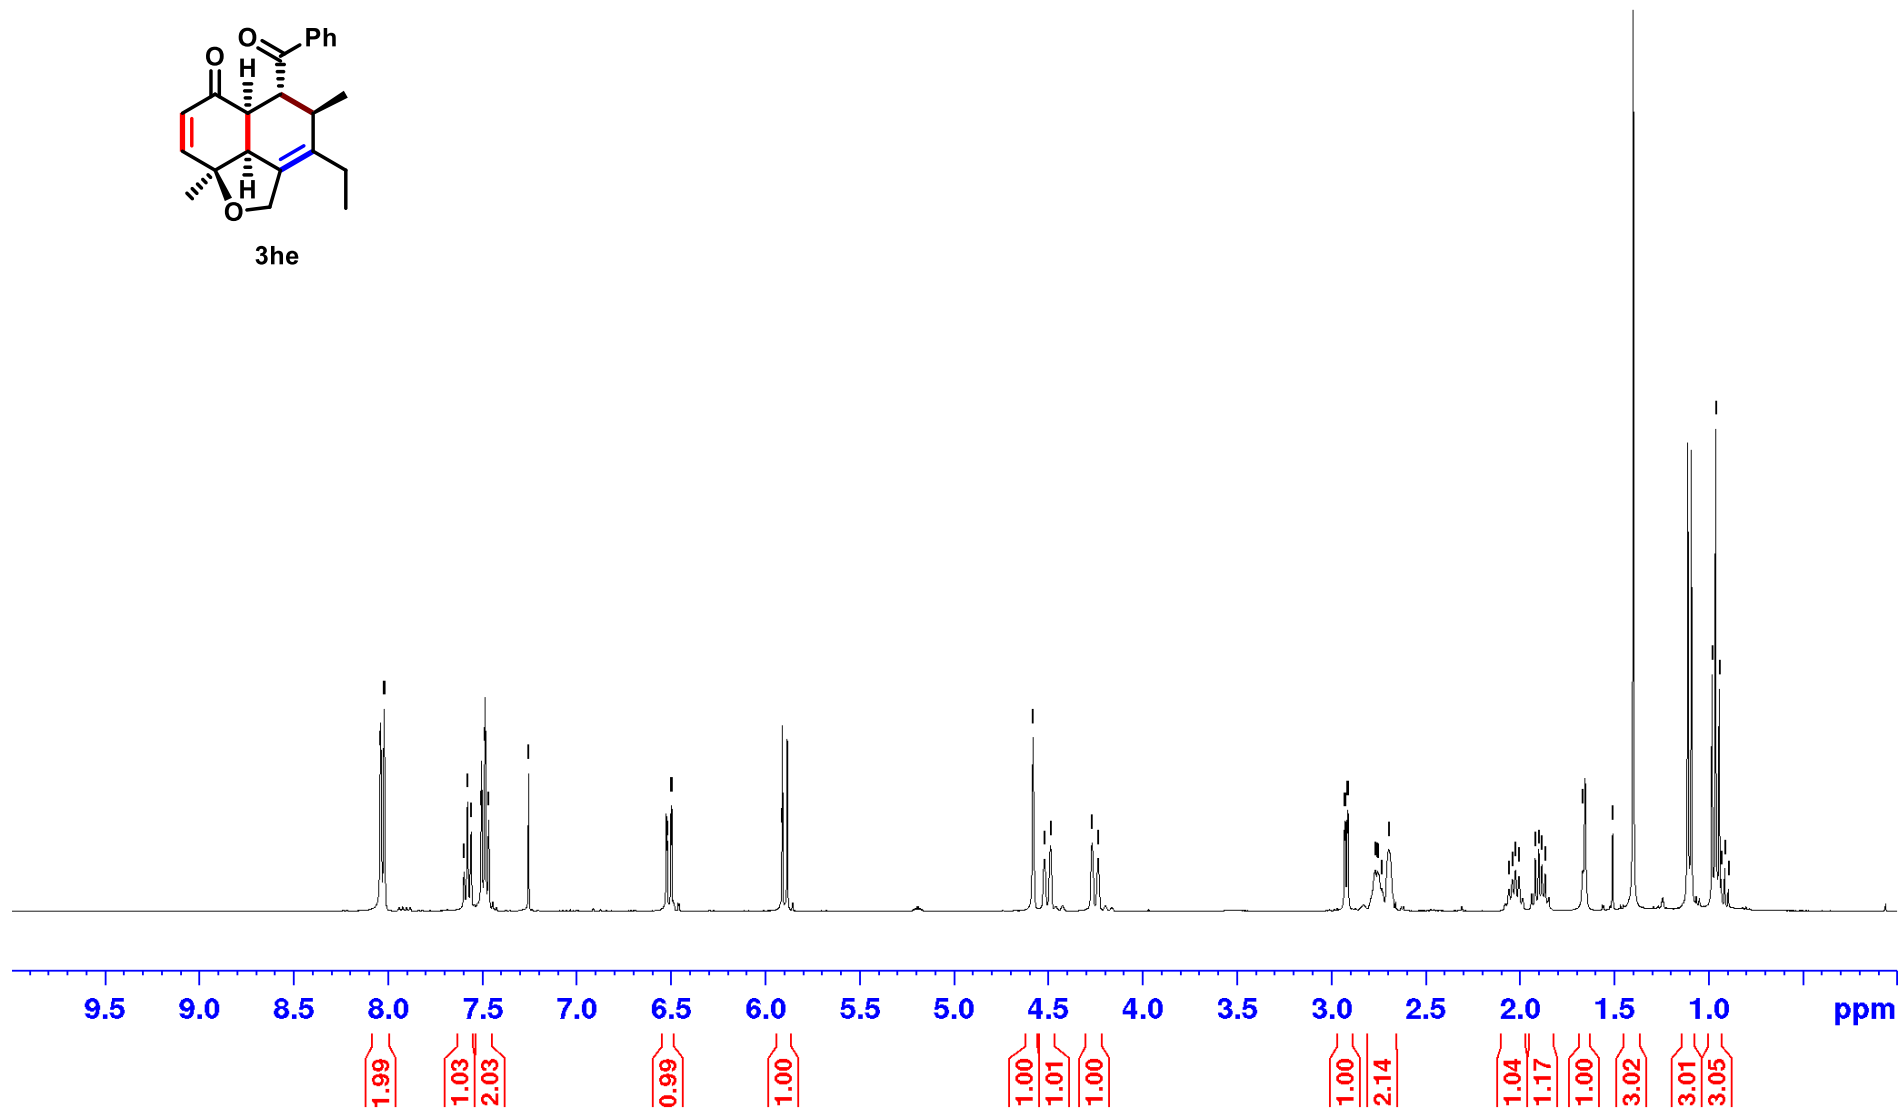

— 201.98

— 196.31

— 151.99

135.59  
134.34  
133.15  
130.68  
128.87  
128.48  
127.97

79.74  
77.30  
76.99  
76.67

— 68.23

— 48.23

— 43.94

— 42.16

— 30.57

— 24.04

— 23.97

— 20.50

— 12.28

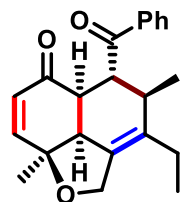

3he

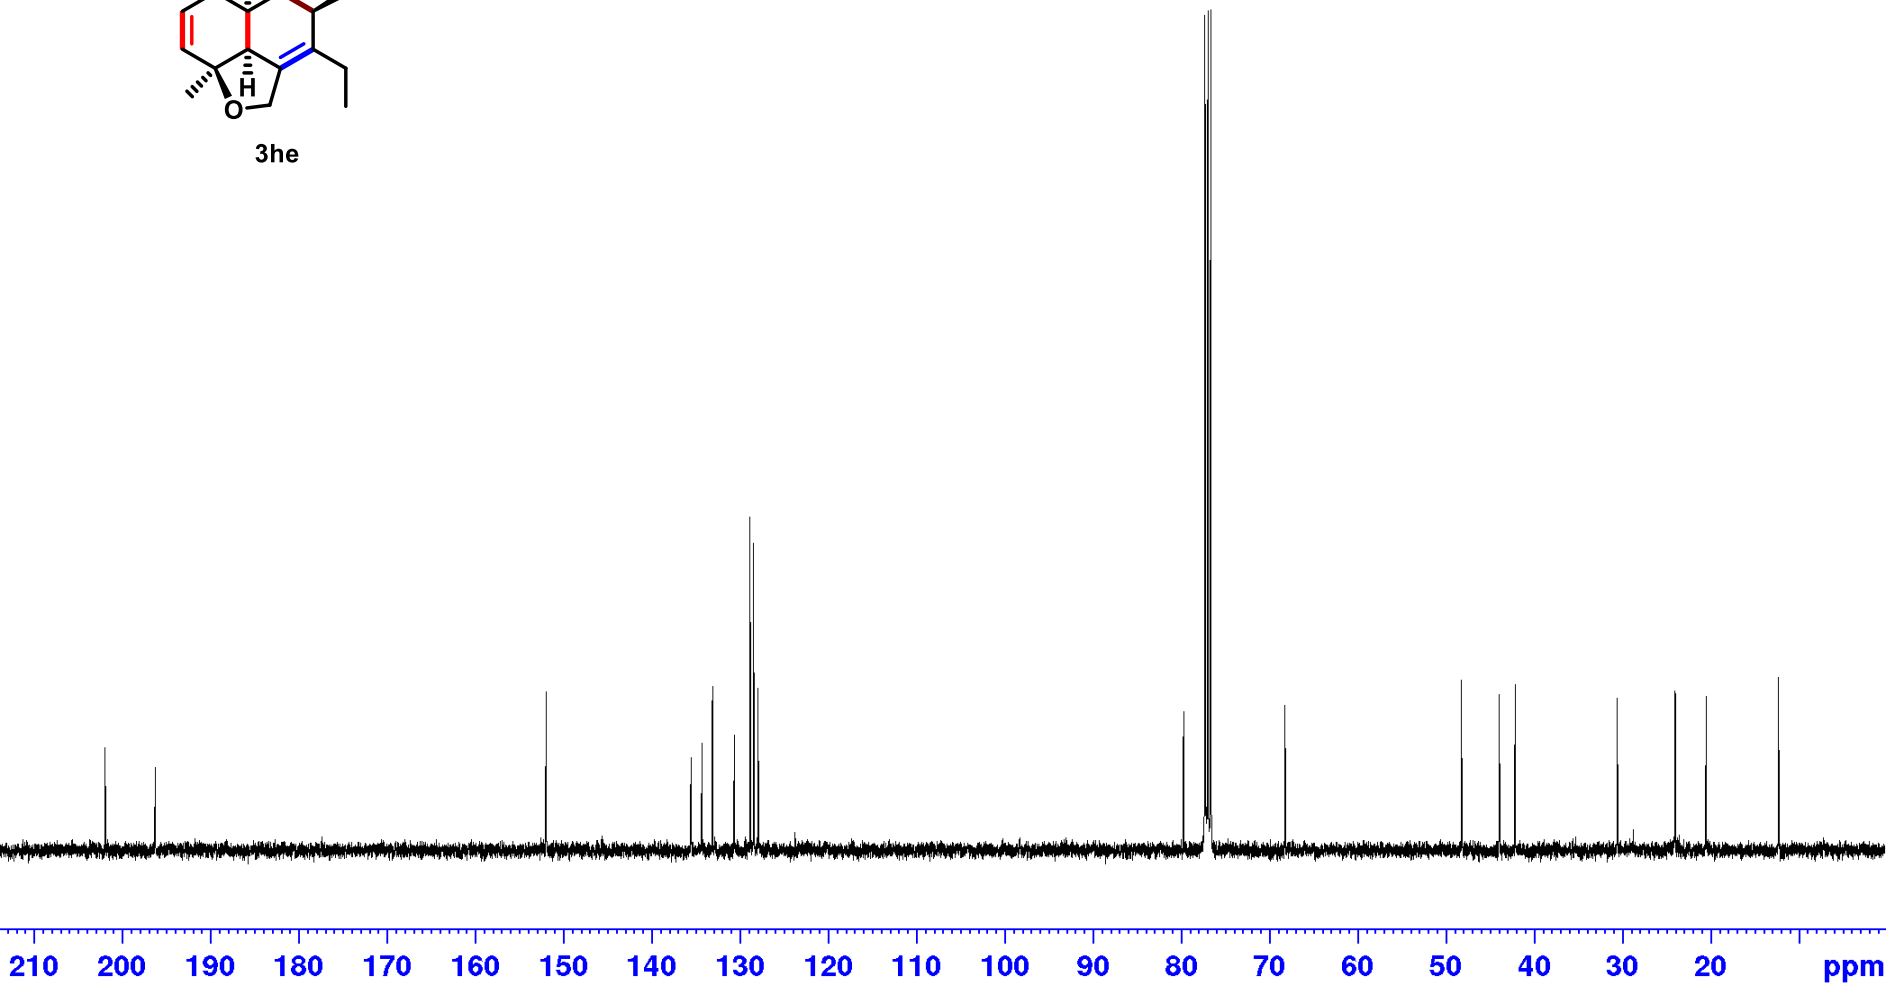

**Chiral Separation** (SFC): Chiralpak IA; Flow (CO<sub>2</sub>) = 3.0 mL/min; Flow (isopropanol) = 0.3 mL/min;  
 T = 25 °C; λ = 250 nm; Back pressure = 15 Mpa

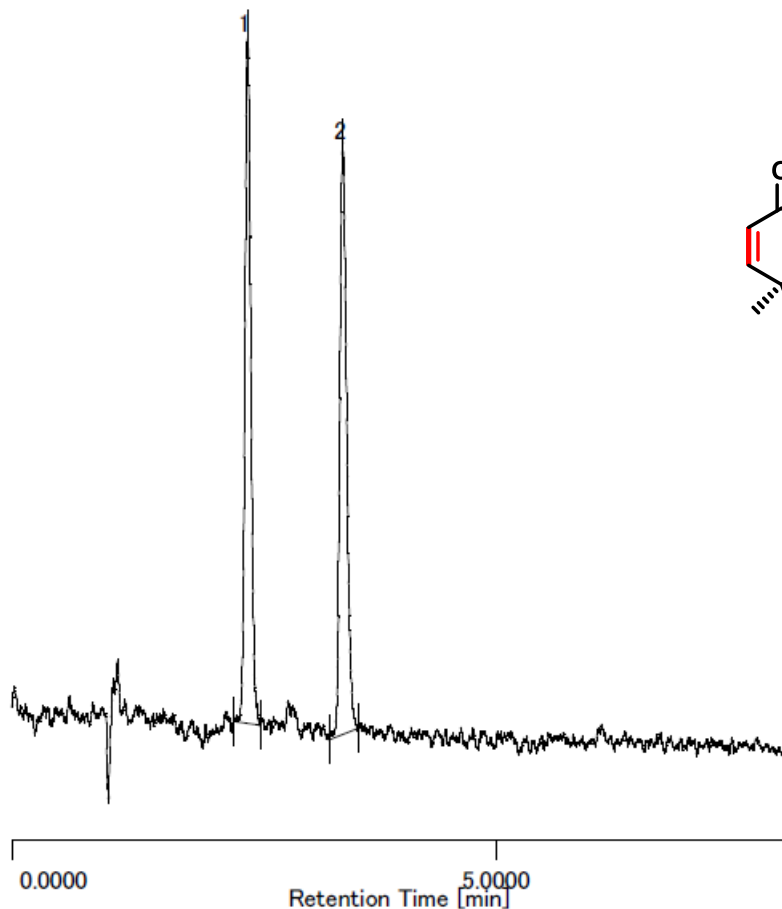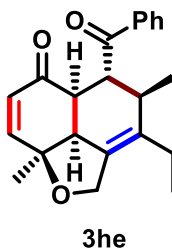

98% ee

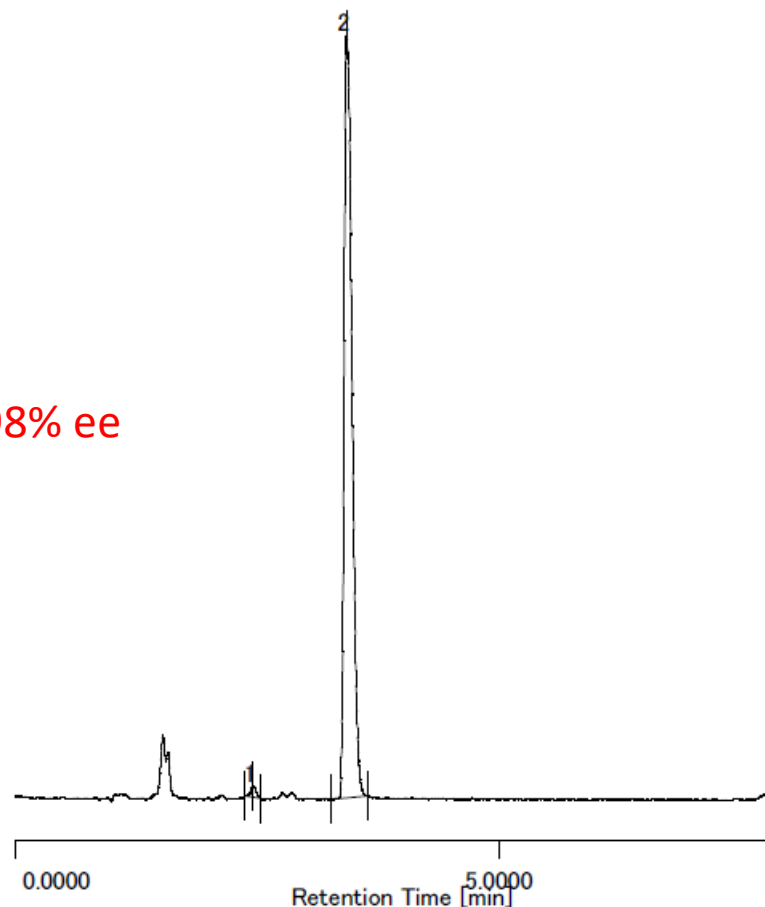

ChromatogramName R-718-rac.dienone-ethyl-yne+PPK

| # | CH | tR     | Area   | Height | Area%  |
|---|----|--------|--------|--------|--------|
| 1 | 10 | 2.4333 | 464991 | 109950 | 50.386 |
| 2 | 10 | 3.4150 | 457871 | 94592  | 49.614 |

ChromatogramName R-720-chiral-dienone-ethyl-yne+PPK

| # | CH | tR     | Area    | Height  | Area%  |
|---|----|--------|---------|---------|--------|
| 1 | 10 | 2.4600 | 90646   | 23505   | 0.998  |
| 2 | 10 | 3.4233 | 8992726 | 1594106 | 99.002 |

Supplementary Figure 25.  $^1\text{H}$ ,  $^{13}\text{C}$ -NMR and SFC spectra of product 3ic

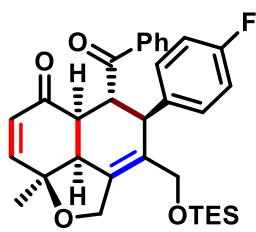

3ic

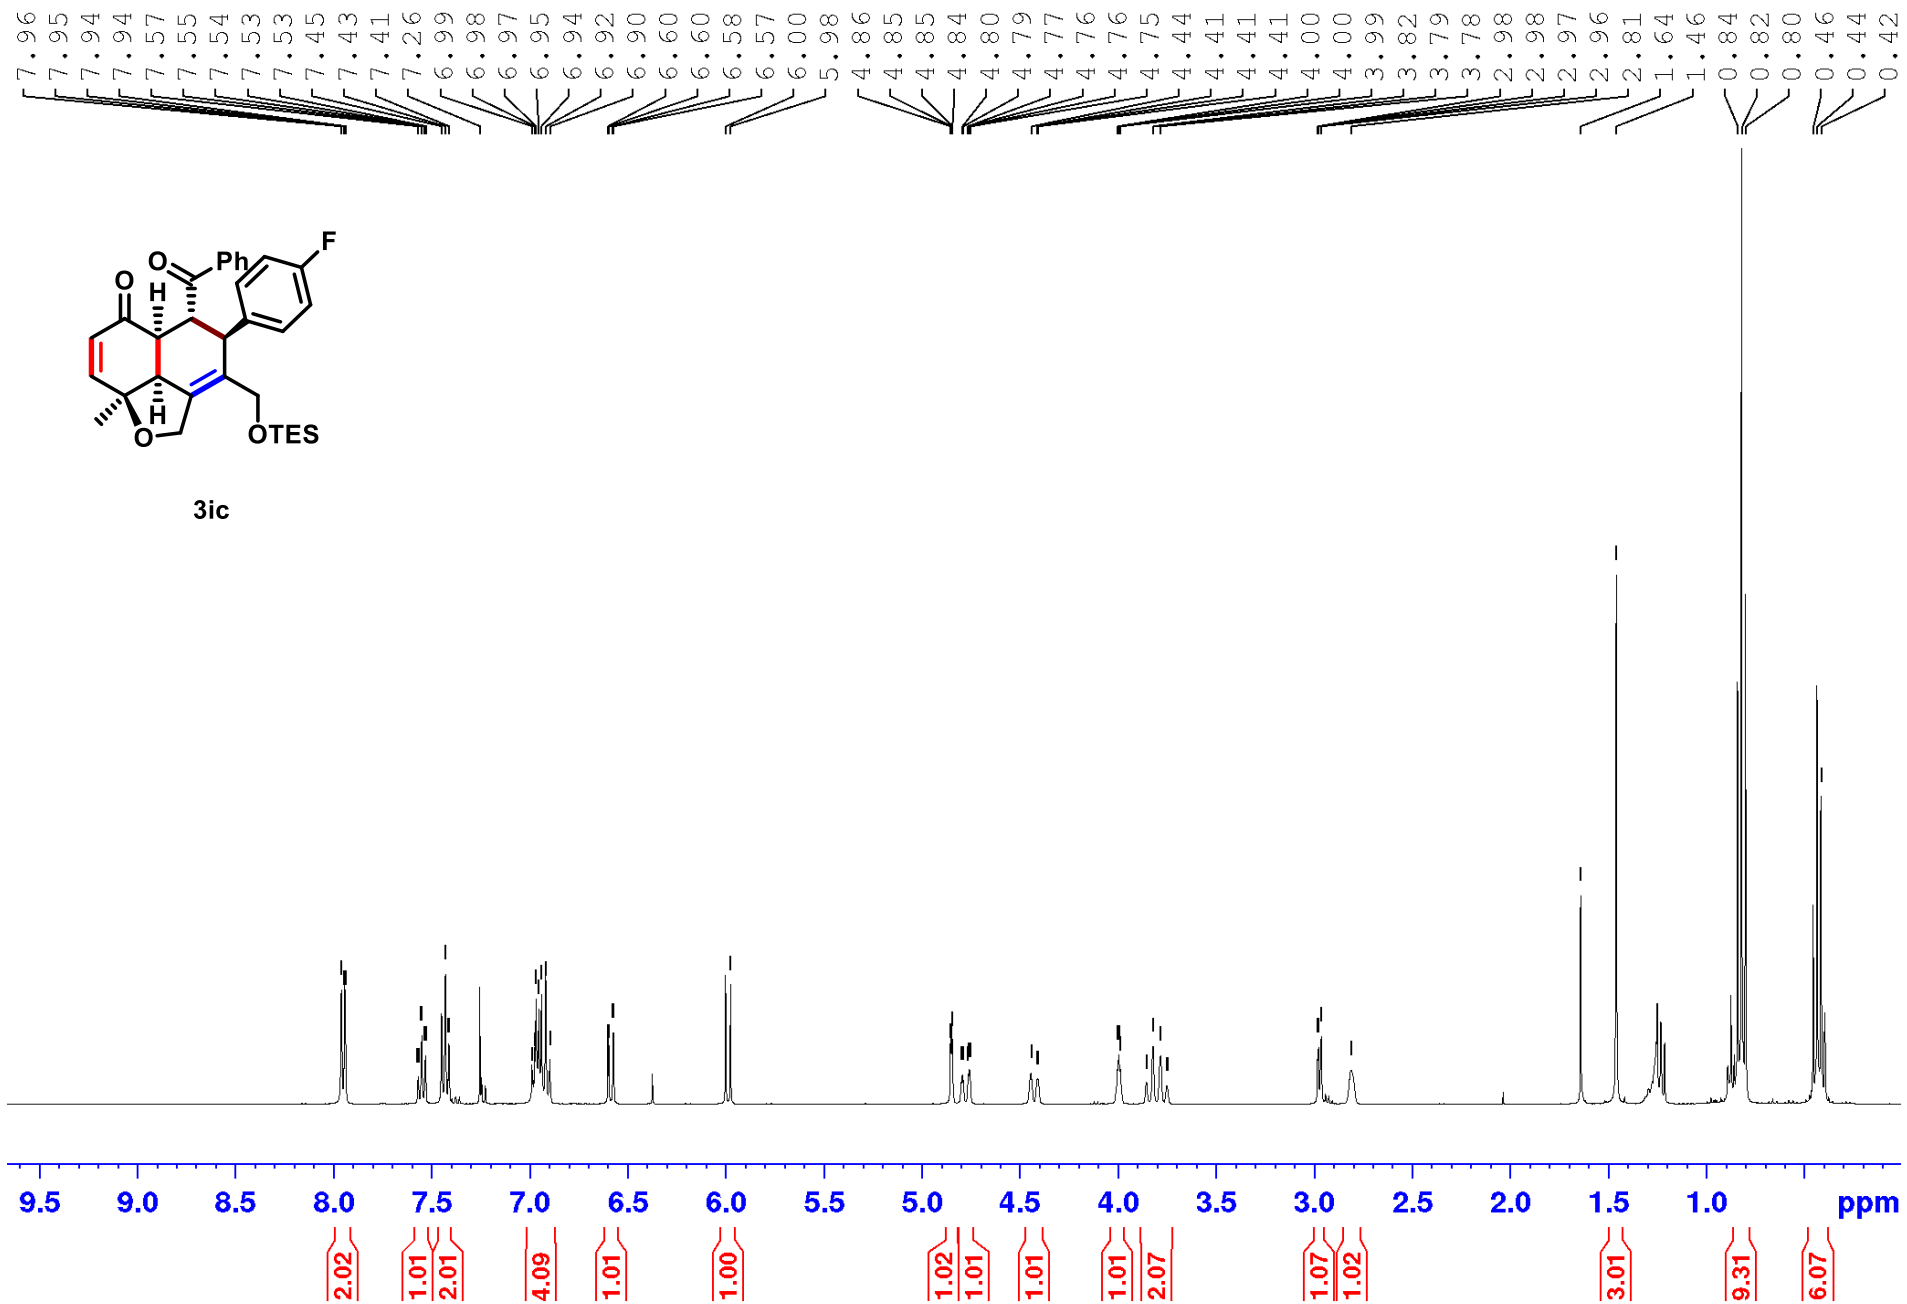

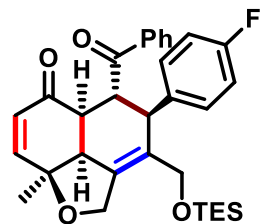

3ic

— 200.91  
— 195.43

— 162.82  
— 160.38

— 151.95  
— 147.33  
— 138.77  
— 138.74  
— 135.61  
— 135.26  
— 133.36  
— 130.58  
— 130.50  
— 129.40  
— 129.12  
— 128.79  
— 128.29  
— 123.78  
— 115.17  
— 114.95

— 79.09  
— 77.31  
— 76.99  
— 76.67  
— 68.55  
— 62.82

— 49.44  
— 44.90  
— 43.30  
— 41.38

— 31.55  
— 28.77  
— 23.78  
— 22.61

— 14.08

— 6.63  
— 4.07

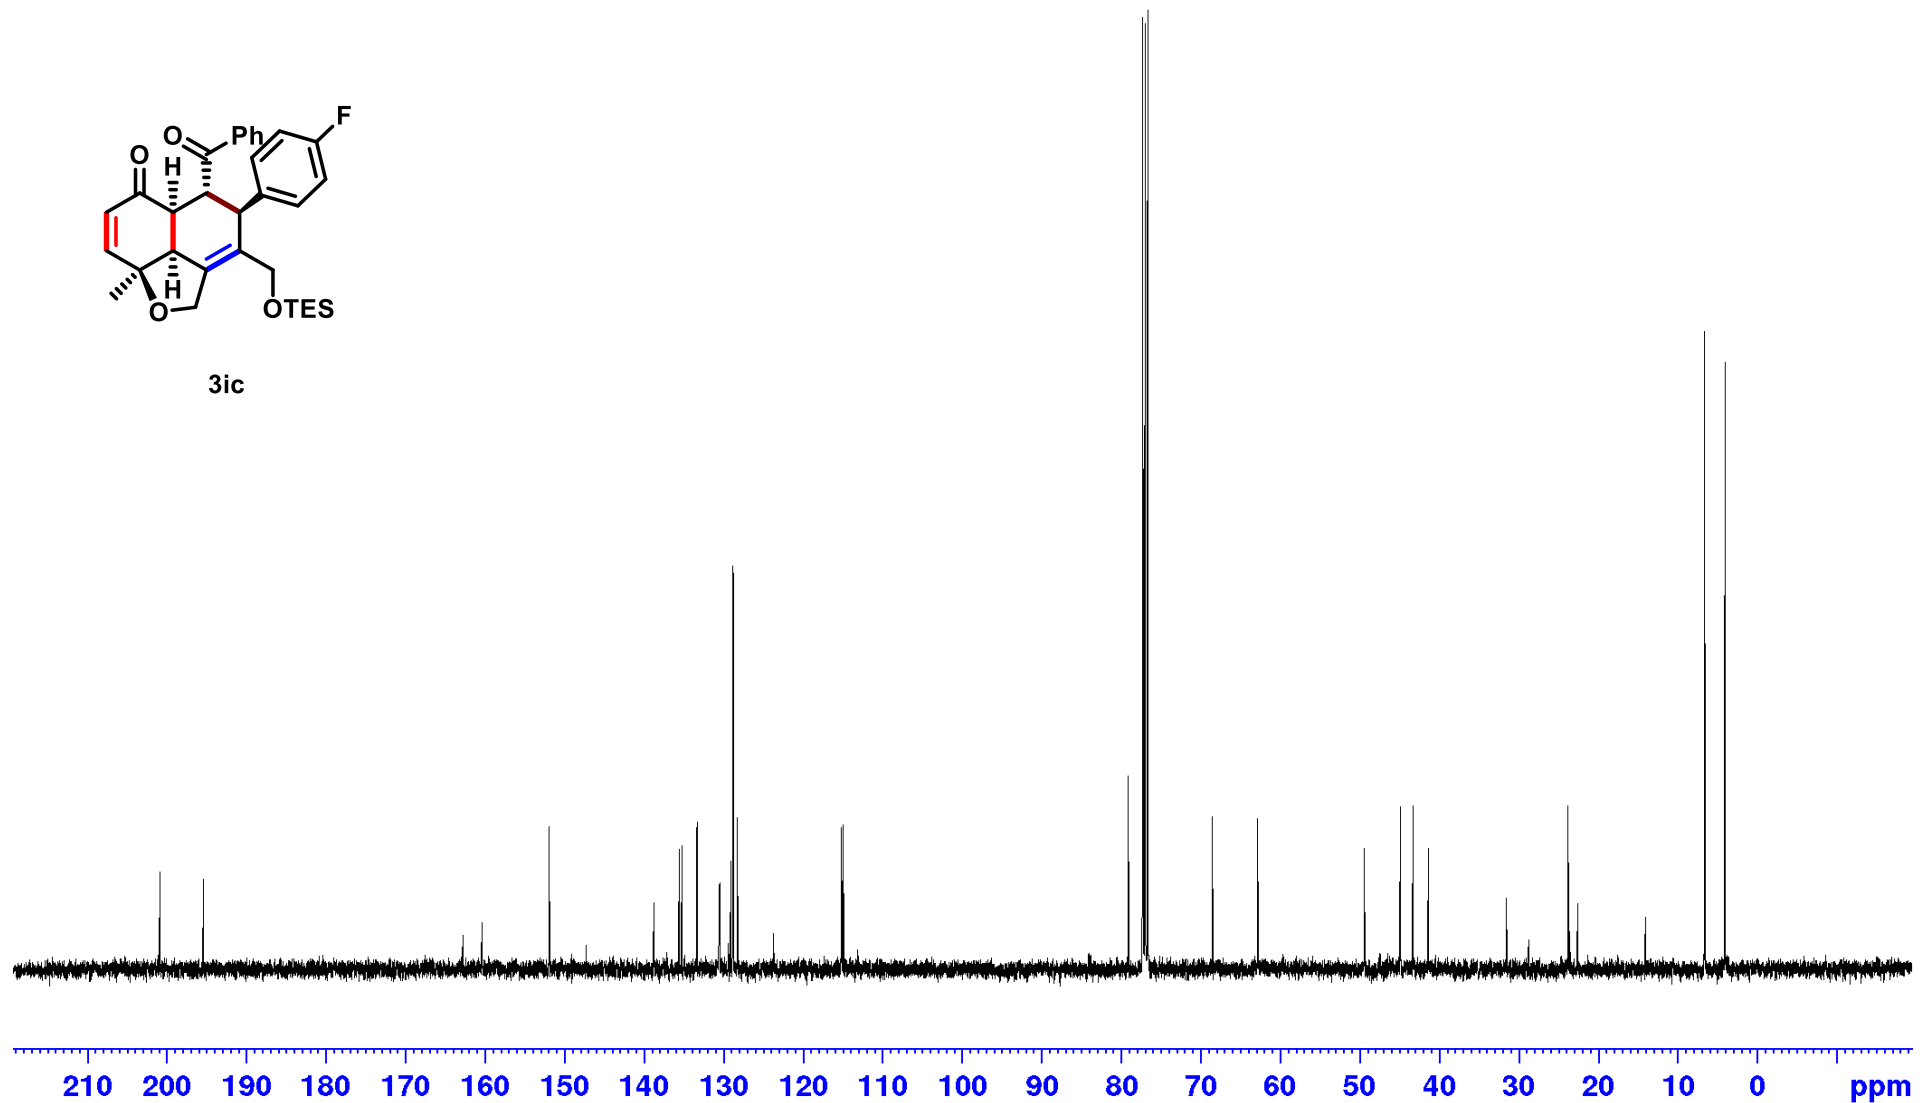

**Chiral Separation** (SFC): Chiralpak IA; Flow (CO<sub>2</sub>) = 3.0 mL/min; Flow (isopropanol) = 0.3 mL/min;  
 T = 25 °C; λ = 250 nm; Back pressure = 15 Mpa

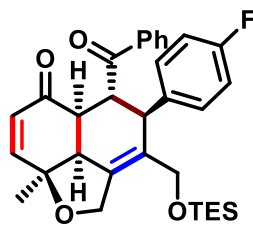

3ic

95% ee

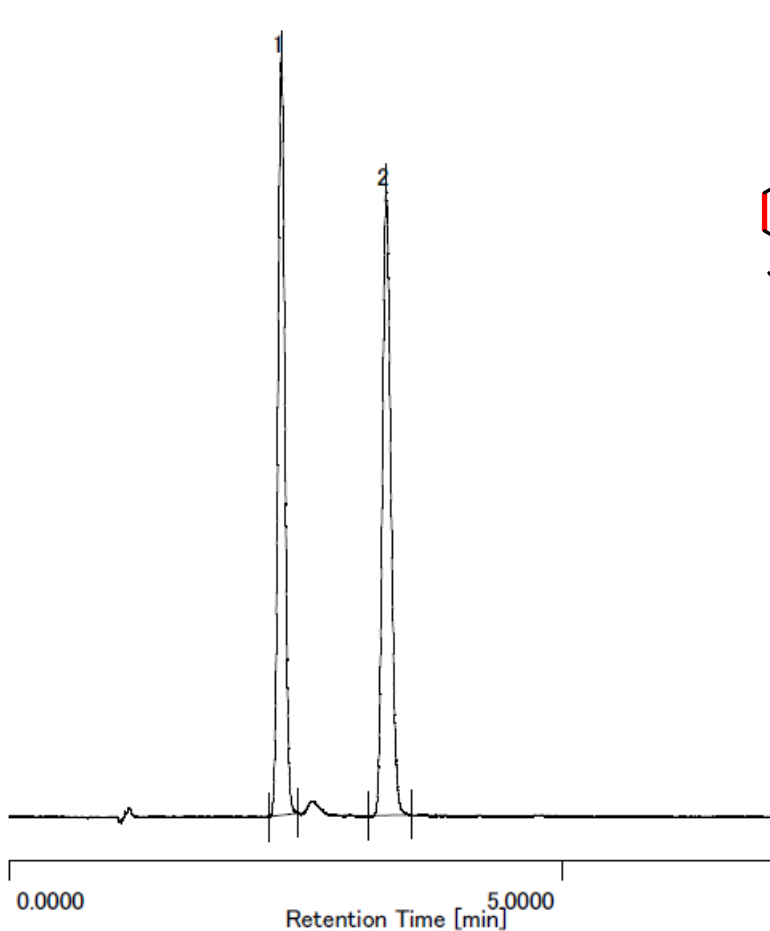

ChromatogramName R-707-rac1

| # | CH | tR     | Area    | Height | Area%  |
|---|----|--------|---------|--------|--------|
| 1 | 9  | 2.4600 | 2224319 | 519973 | 49.565 |
| 2 | 9  | 3.4067 | 2263399 | 429511 | 50.435 |

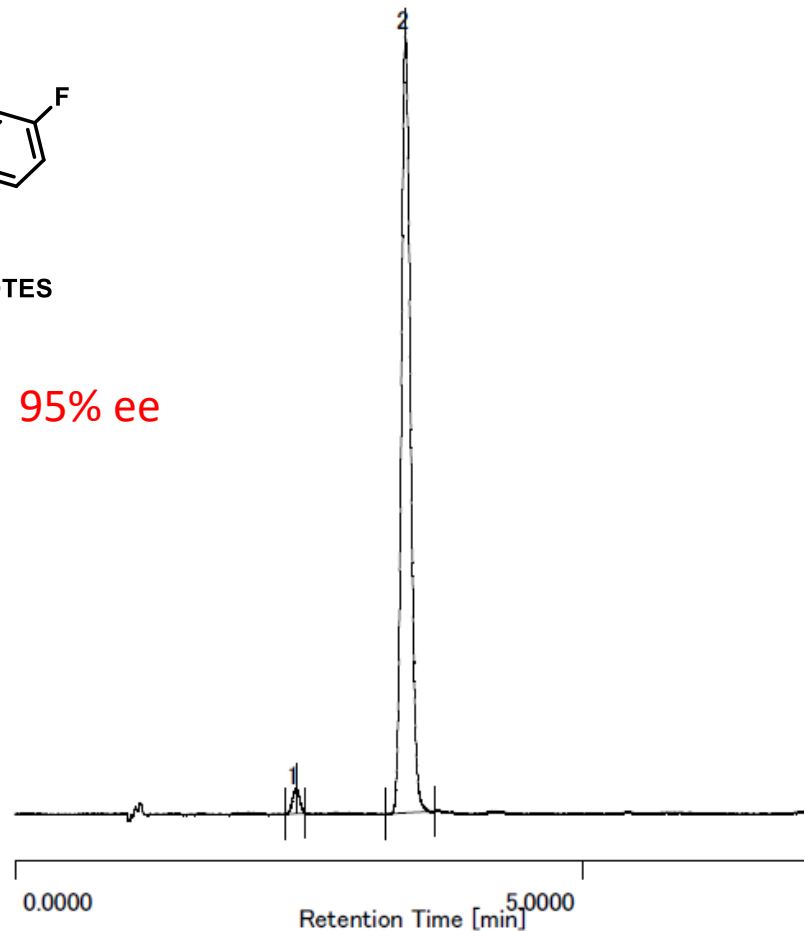

ChromatogramName R-710-chir-OTES-F-chal.

| # | CH | tR     | Area    | Height | Area%  |
|---|----|--------|---------|--------|--------|
| 1 | 9  | 2.4767 | 58021   | 13359  | 2.495  |
| 2 | 9  | 3.4367 | 2267722 | 412149 | 97.505 |

Supplementary Figure 26. <sup>1</sup>H, <sup>13</sup>C-NMR and SFC spectra of product 3ik

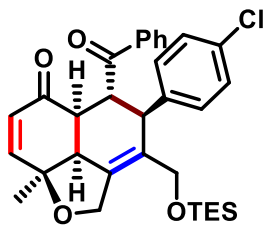

3ik

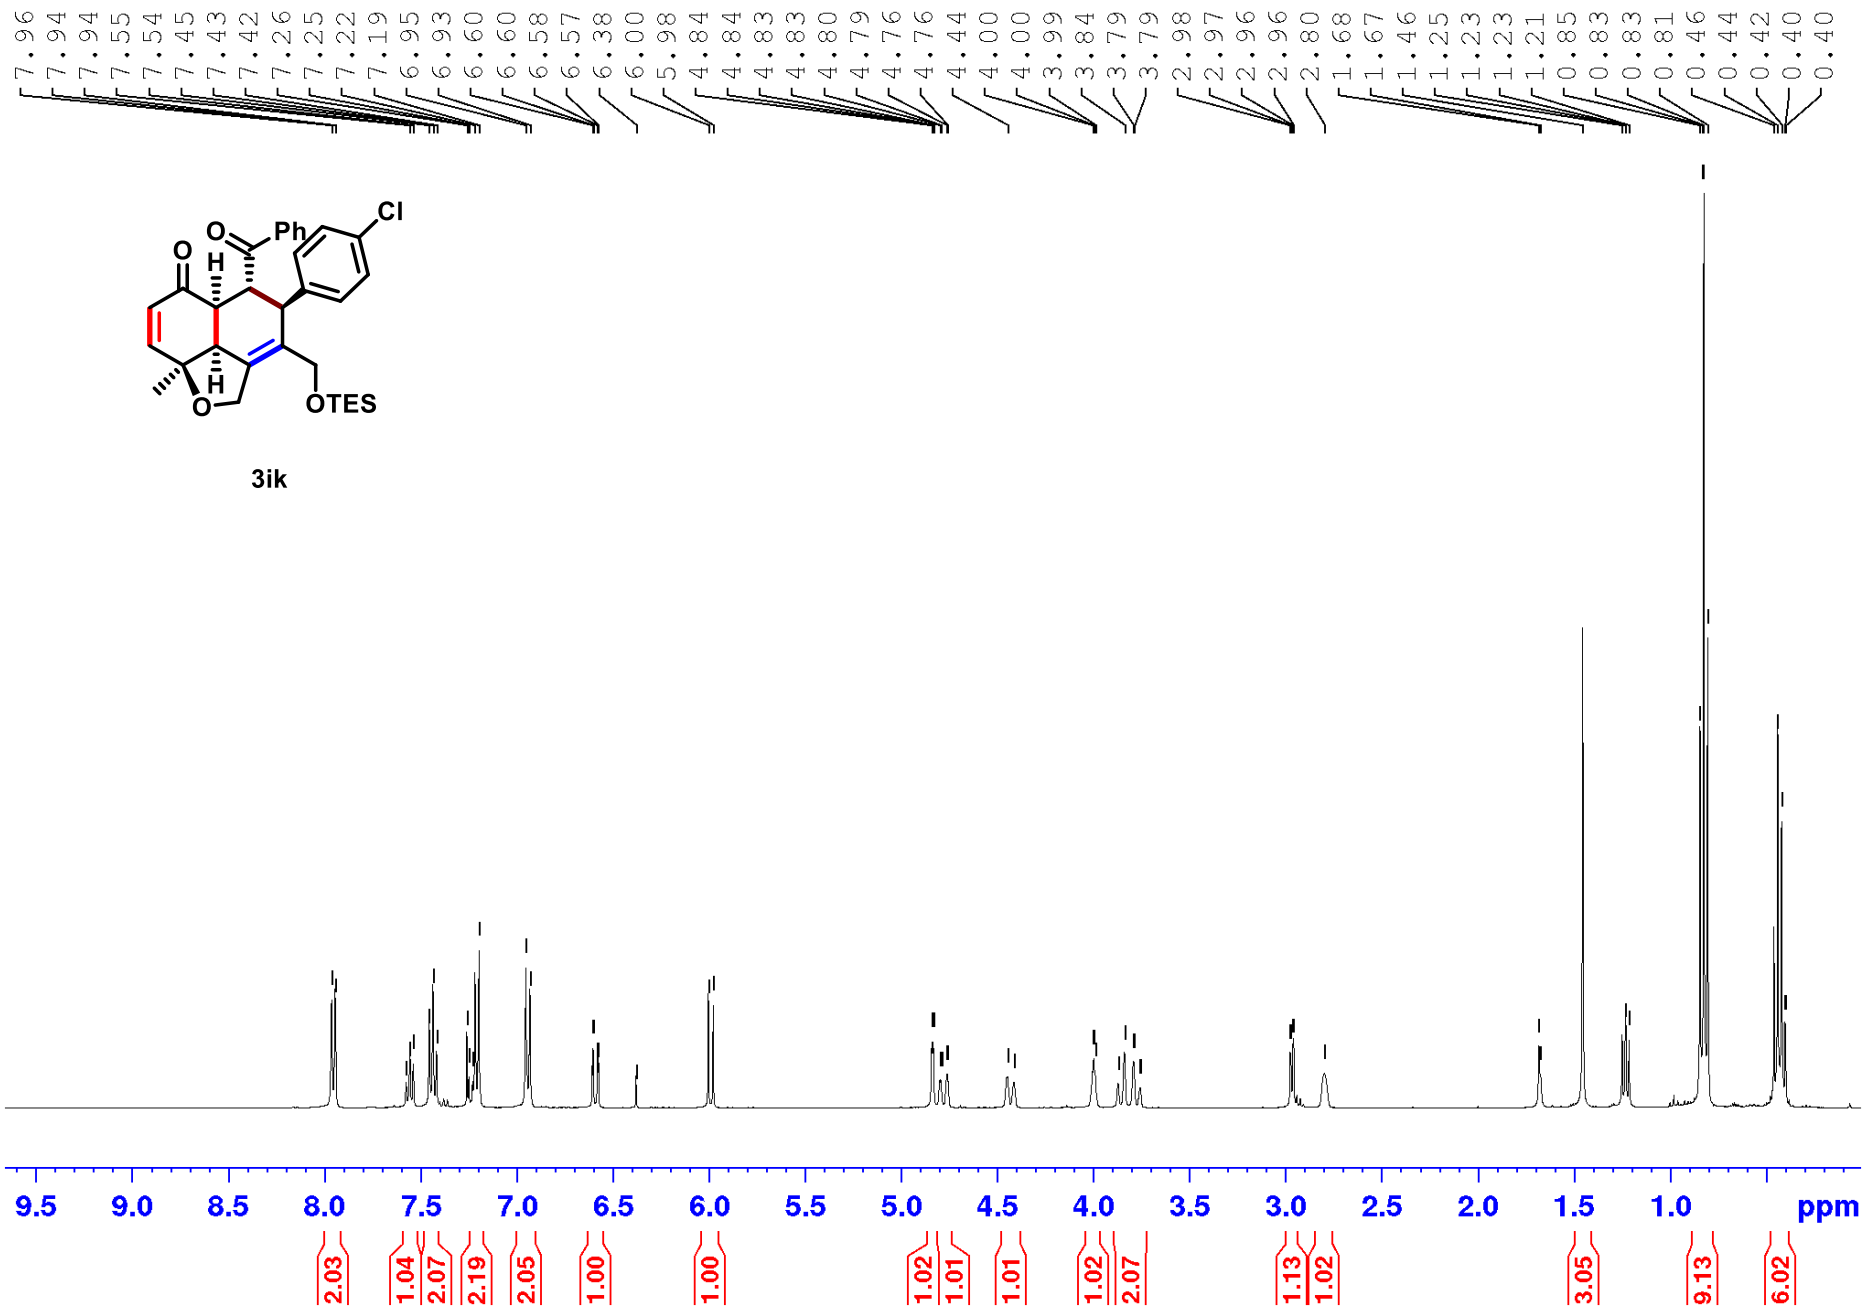

— 200.77  
— 195.31

— 151.99  
— 141.60  
— 135.80  
— 135.19  
— 133.40  
— 132.44  
— 130.42  
— 128.86  
— 128.78  
— 128.40  
— 128.27

— 79.12  
— 77.32  
— 77.00  
— 76.68  
— 68.55  
— 62.76

— 49.28  
— 44.84  
— 43.26  
— 41.47

— 28.77  
— 23.78  
— 23.59

— 6.64  
— 4.08

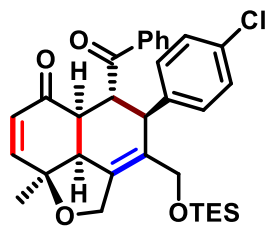

3ik

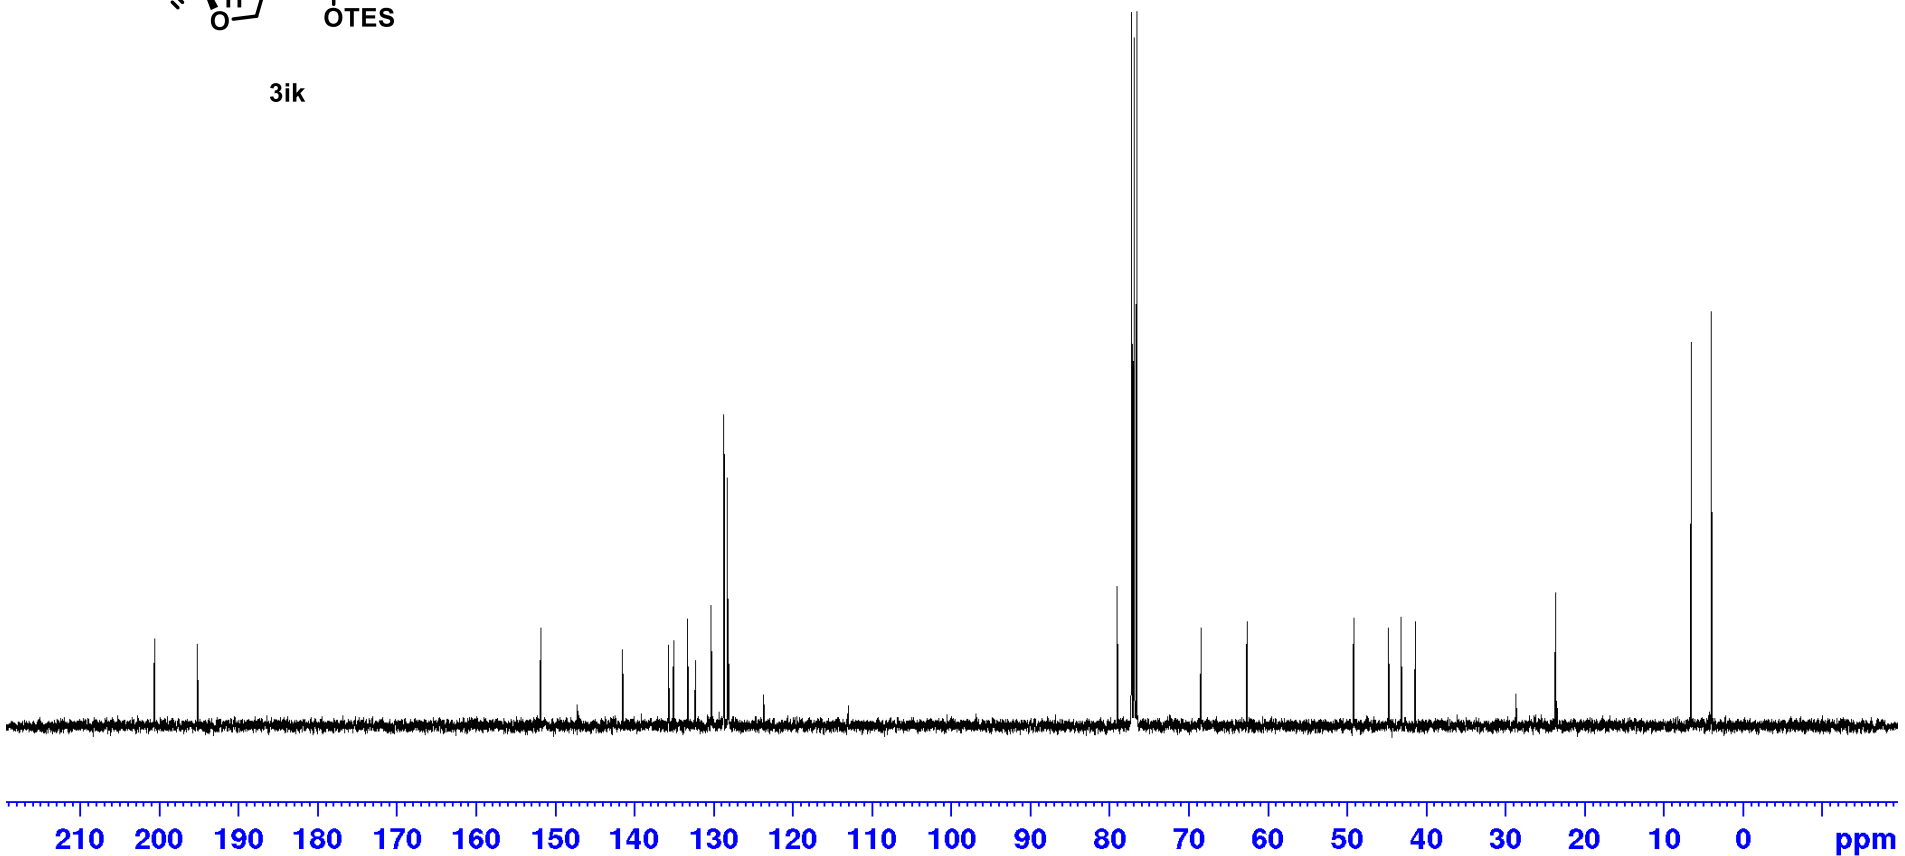



**Chiral Separation** (SFC): Chiralpak IA; Flow (CO<sub>2</sub>) = 3.0 mL/min; Flow (isopropanol) = 0.3 mL/min;  
 T = 25 °C; λ = 250 nm; Back pressure = 15 Mpa

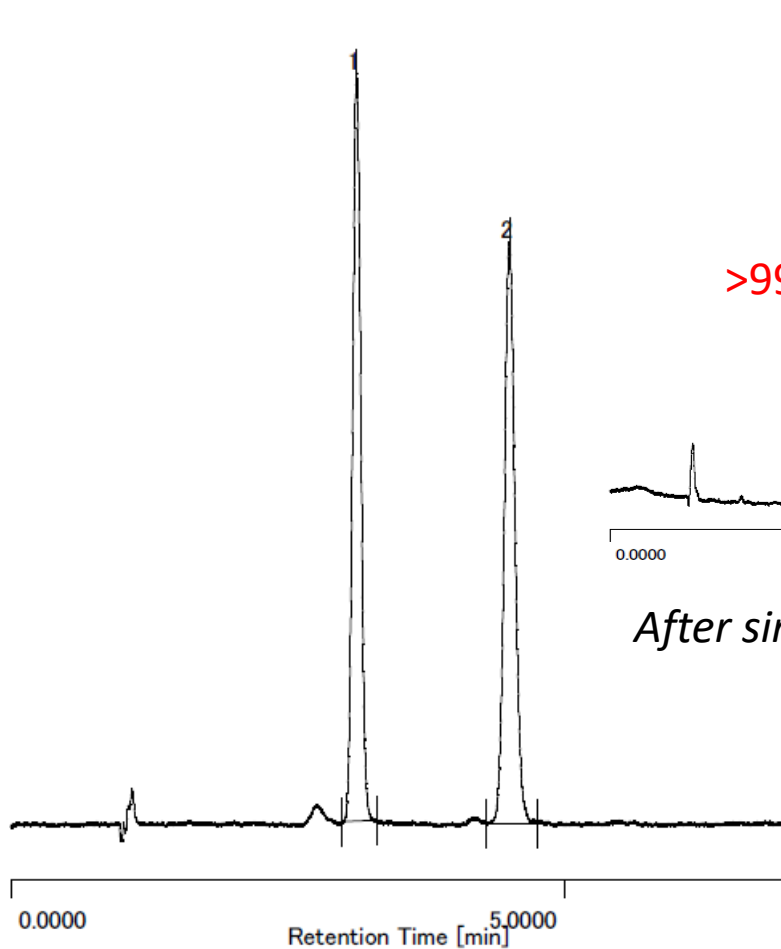

ChromatogramName R-712-rac1

| # | CH | tR     | Area   | Height | Area%  |
|---|----|--------|--------|--------|--------|
| 1 | 9  | 3.1217 | 713916 | 139962 | 49.615 |
| 2 | 9  | 4.4983 | 724992 | 108951 | 50.385 |

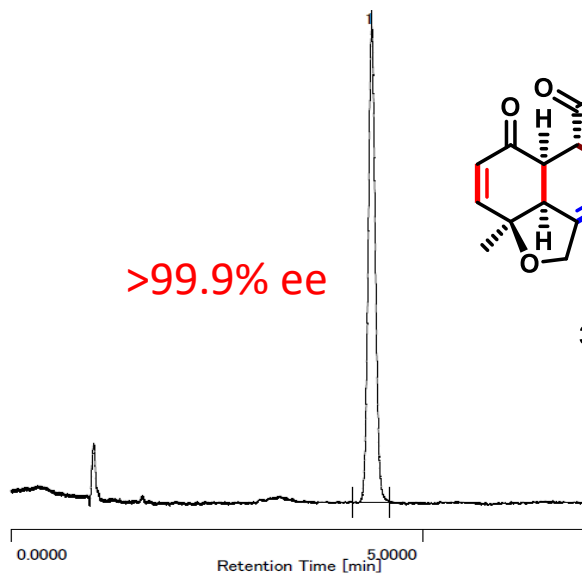

>99.9% ee

After single recrystallization

97% ee

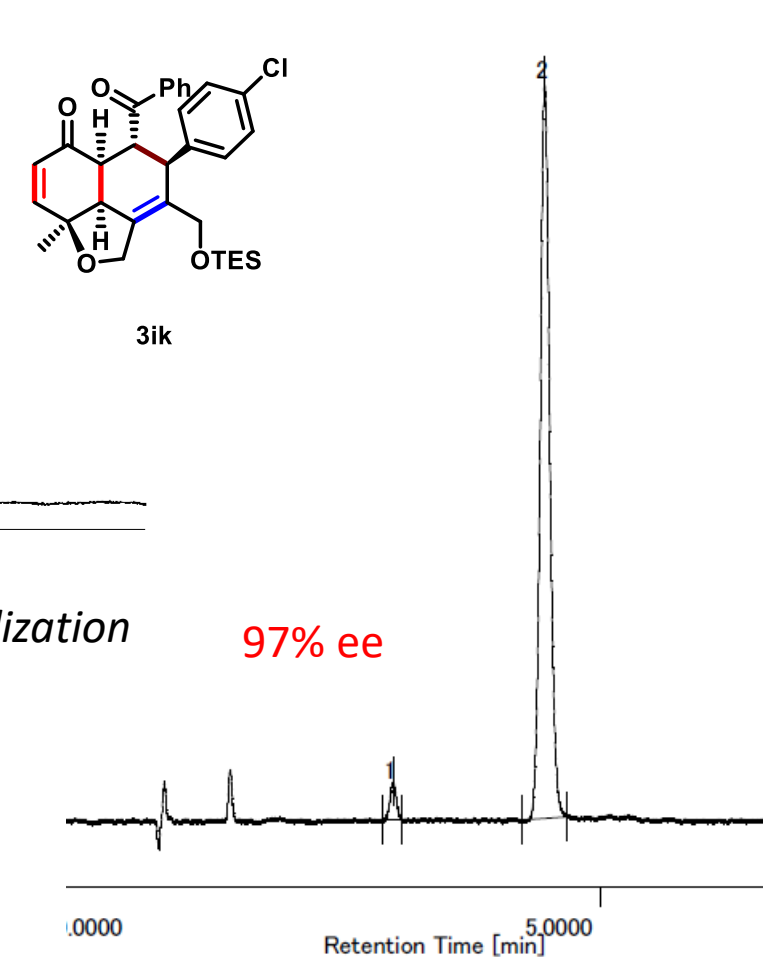

ChromatogramName R-714--chir-OTES-Cl-chal.

| # | CH | tR     | Area   | Height | Area%  |
|---|----|--------|--------|--------|--------|
| 1 | 9  | 3.1250 | 26451  | 6936   | 3.161  |
| 2 | 9  | 4.4933 | 810292 | 135802 | 96.839 |

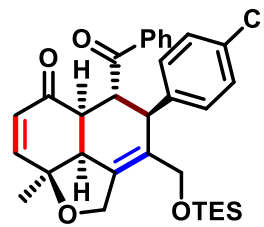

3ik

Supplementary Figure 27. <sup>1</sup>H and <sup>13</sup>C-NMR spectra of product 4

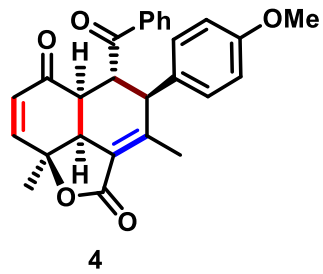

8.00  
7.98  
7.97  
7.61  
7.60  
7.58  
7.49  
7.47  
7.45  
7.26  
6.88  
6.86  
6.82  
6.79  
6.68  
6.68  
6.66  
6.65  
6.08  
6.05

— 4.94

— 3.94  
— 3.78  
3.23  
3.22  
3.21  
3.21  
3.02  
3.00

< 2.04  
< 2.04  
— 1.63

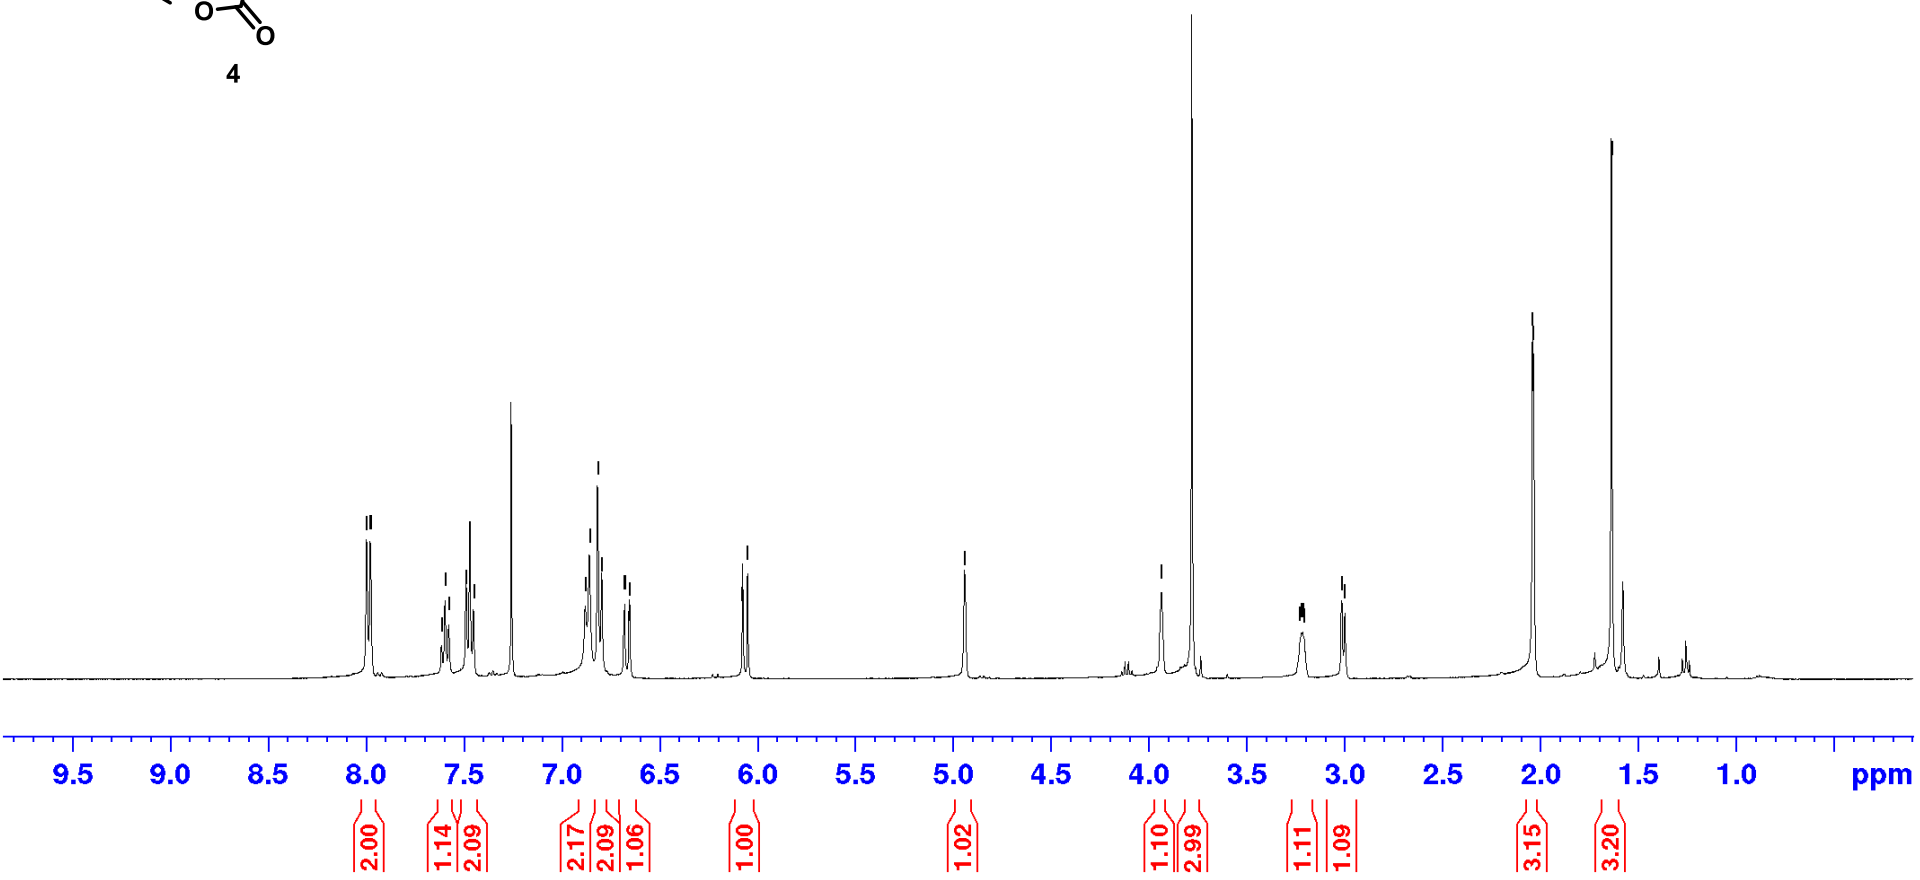

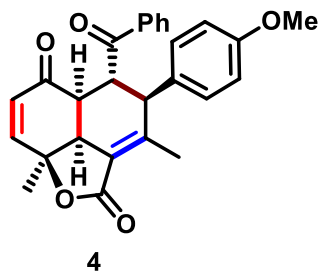

- 200.48
- 193.55
- 167.21
- 158.62
- 153.37
- 147.41
- 134.55
- 133.80
- 133.46
- 130.10
- 129.03
- 128.88
- 127.93
- 120.93
- 114.01

- 78.70
- 77.31
- 76.99
- 76.68

- 55.17
- 48.77
- 46.32
- 43.00
- 41.59

- 24.72
- 17.41

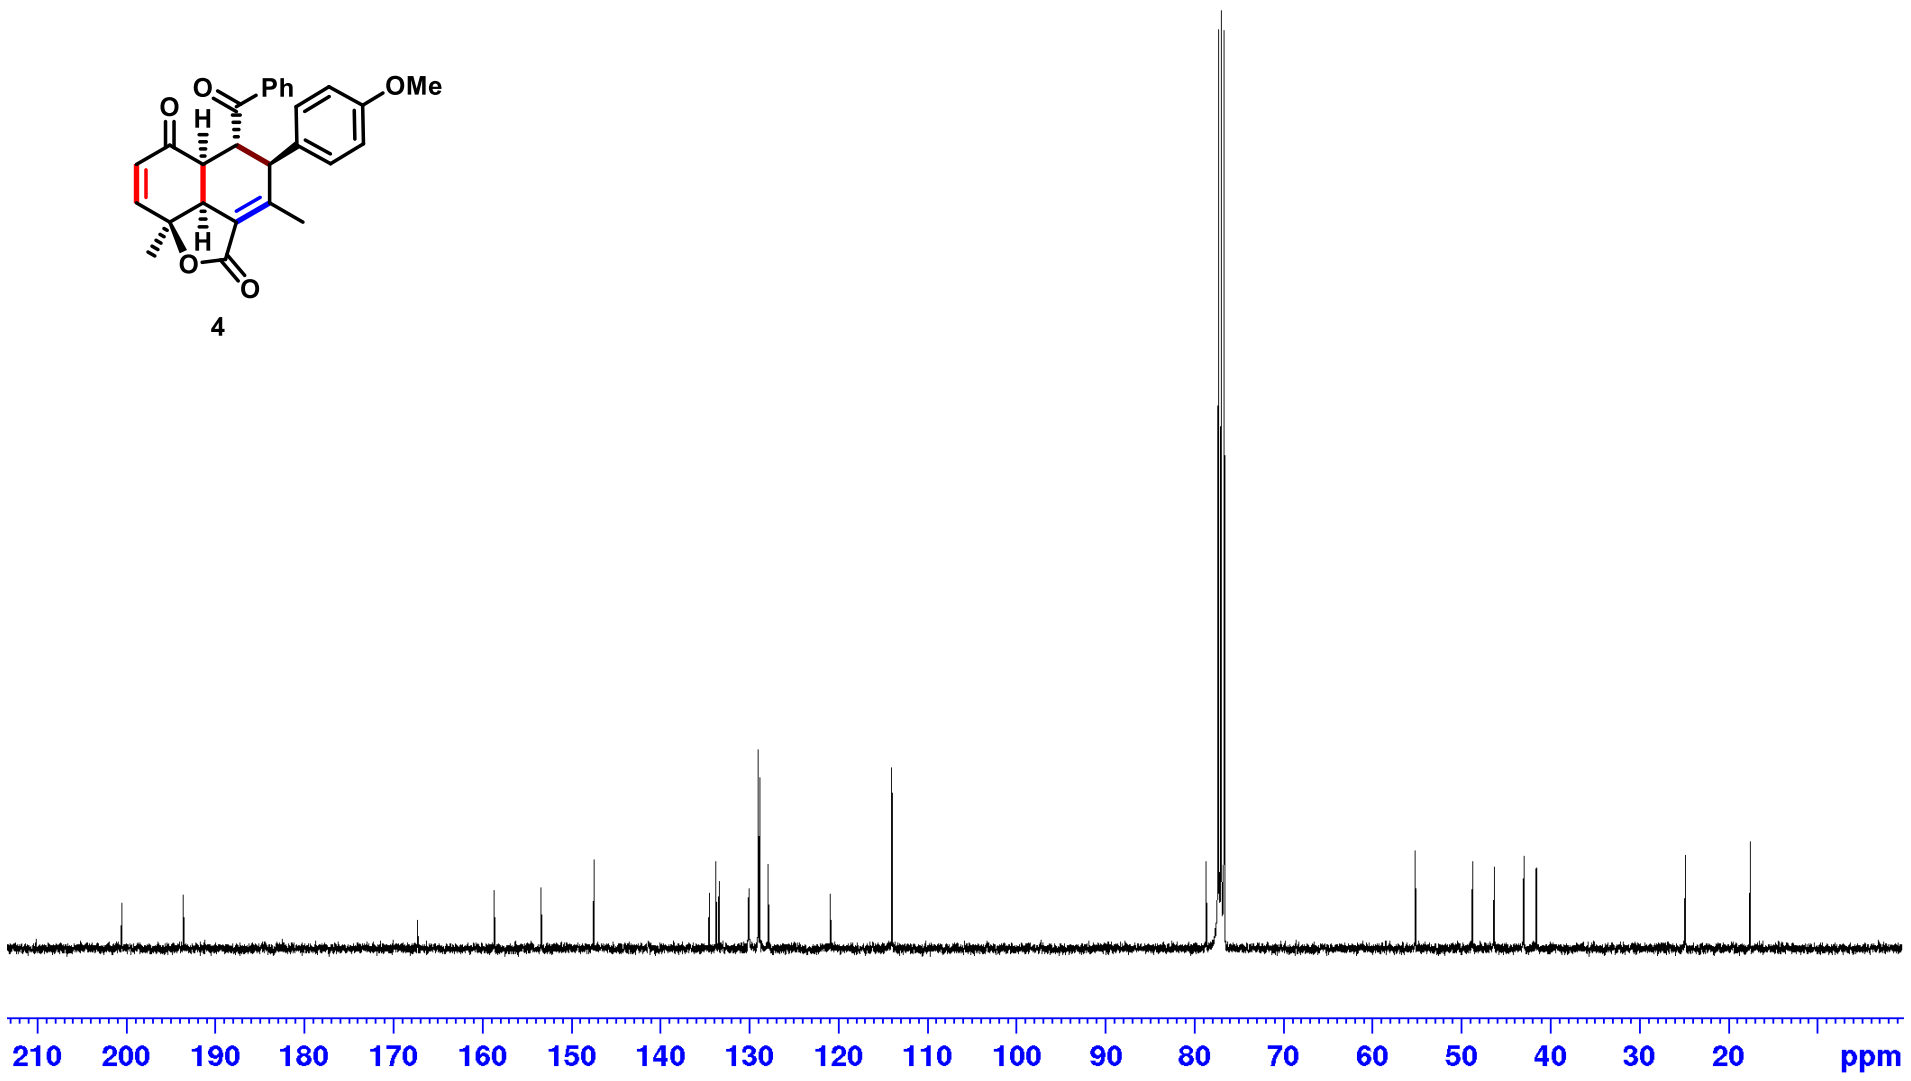

Supplementary Figure 28. <sup>1</sup>H and <sup>13</sup>C-NMR of product 5

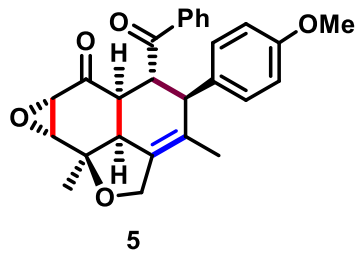

7.75  
7.73  
7.73  
7.52  
7.52  
7.50  
7.48  
7.48  
7.38  
7.36  
7.34  
7.26  
7.17  
7.17  
6.82  
6.80  
4.75  
4.74  
4.73  
4.73  
4.55  
4.55  
4.54  
4.52  
4.52  
4.51  
4.44  
4.43  
4.43  
4.40  
4.40  
4.40  
3.88  
3.76  
3.75  
3.43  
3.42  
3.42  
3.41  
3.41  
3.40  
3.32  
3.31  
3.30  
2.75  
2.75  
2.74  
1.60  
1.31  
1.31  
1.25

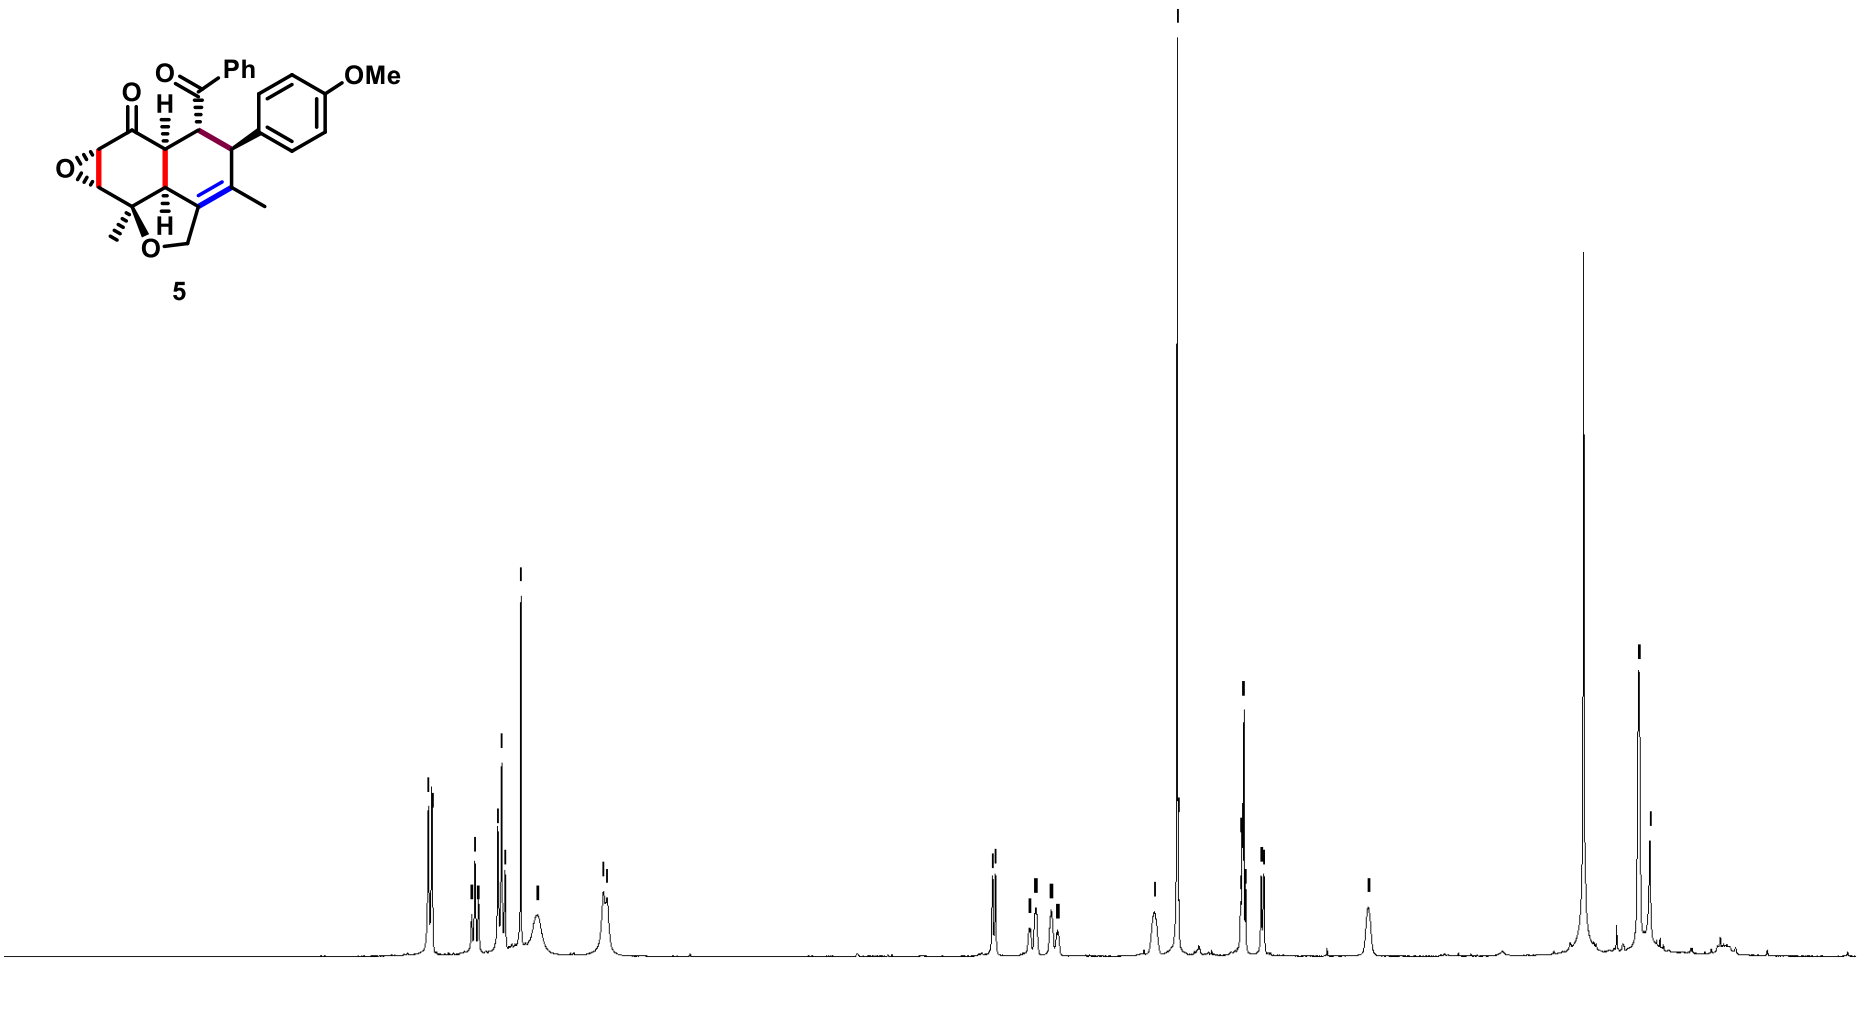

9.5 9.0 8.5 8.0 7.5 7.0 6.5 6.0 5.5 5.0 4.5 4.0 3.5 3.0 2.5 2.0 1.5 1.0 ppm

2.12  
1.21  
2.44  
1.94  
2.04  
1.00  
1.04  
1.00  
1.08  
3.13  
2.00  
1.00  
1.04  
3.56

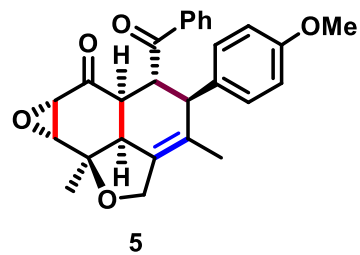

— 204.07  
— 201.41

— 158.25

— 135.67  
— 134.72  
— 133.34  
— 132.80  
— 129.31  
— 128.72  
— 128.59

— 113.69

— 79.60  
— 77.31  
— 77.00  
— 76.68

— 68.97

— 63.75

— 55.66  
— 55.15

— 49.58  
— 48.11

— 44.38  
— 42.66

— 23.88

— 17.97

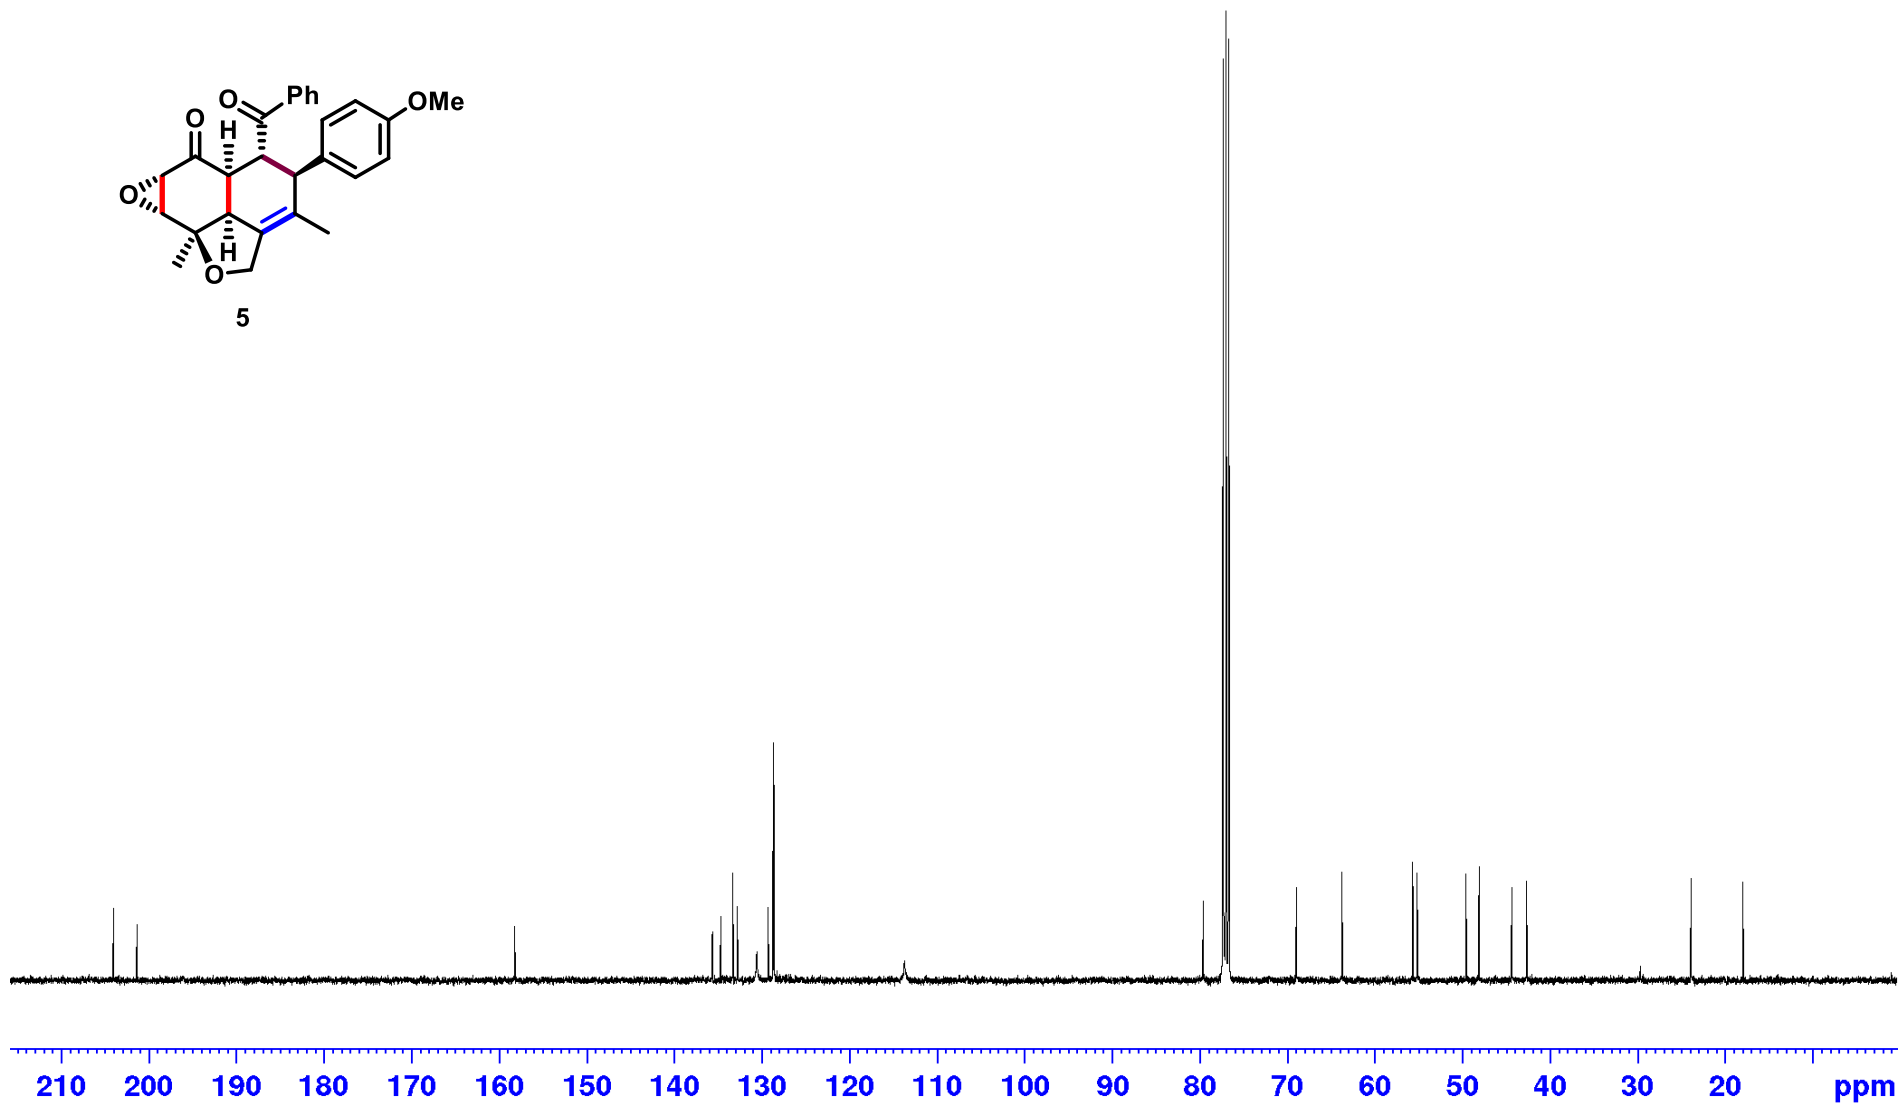

Supplementary Figure 29. <sup>1</sup>H and <sup>13</sup>C-NMR of product 6

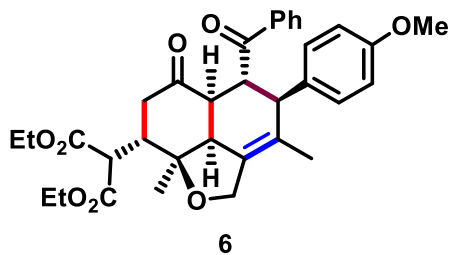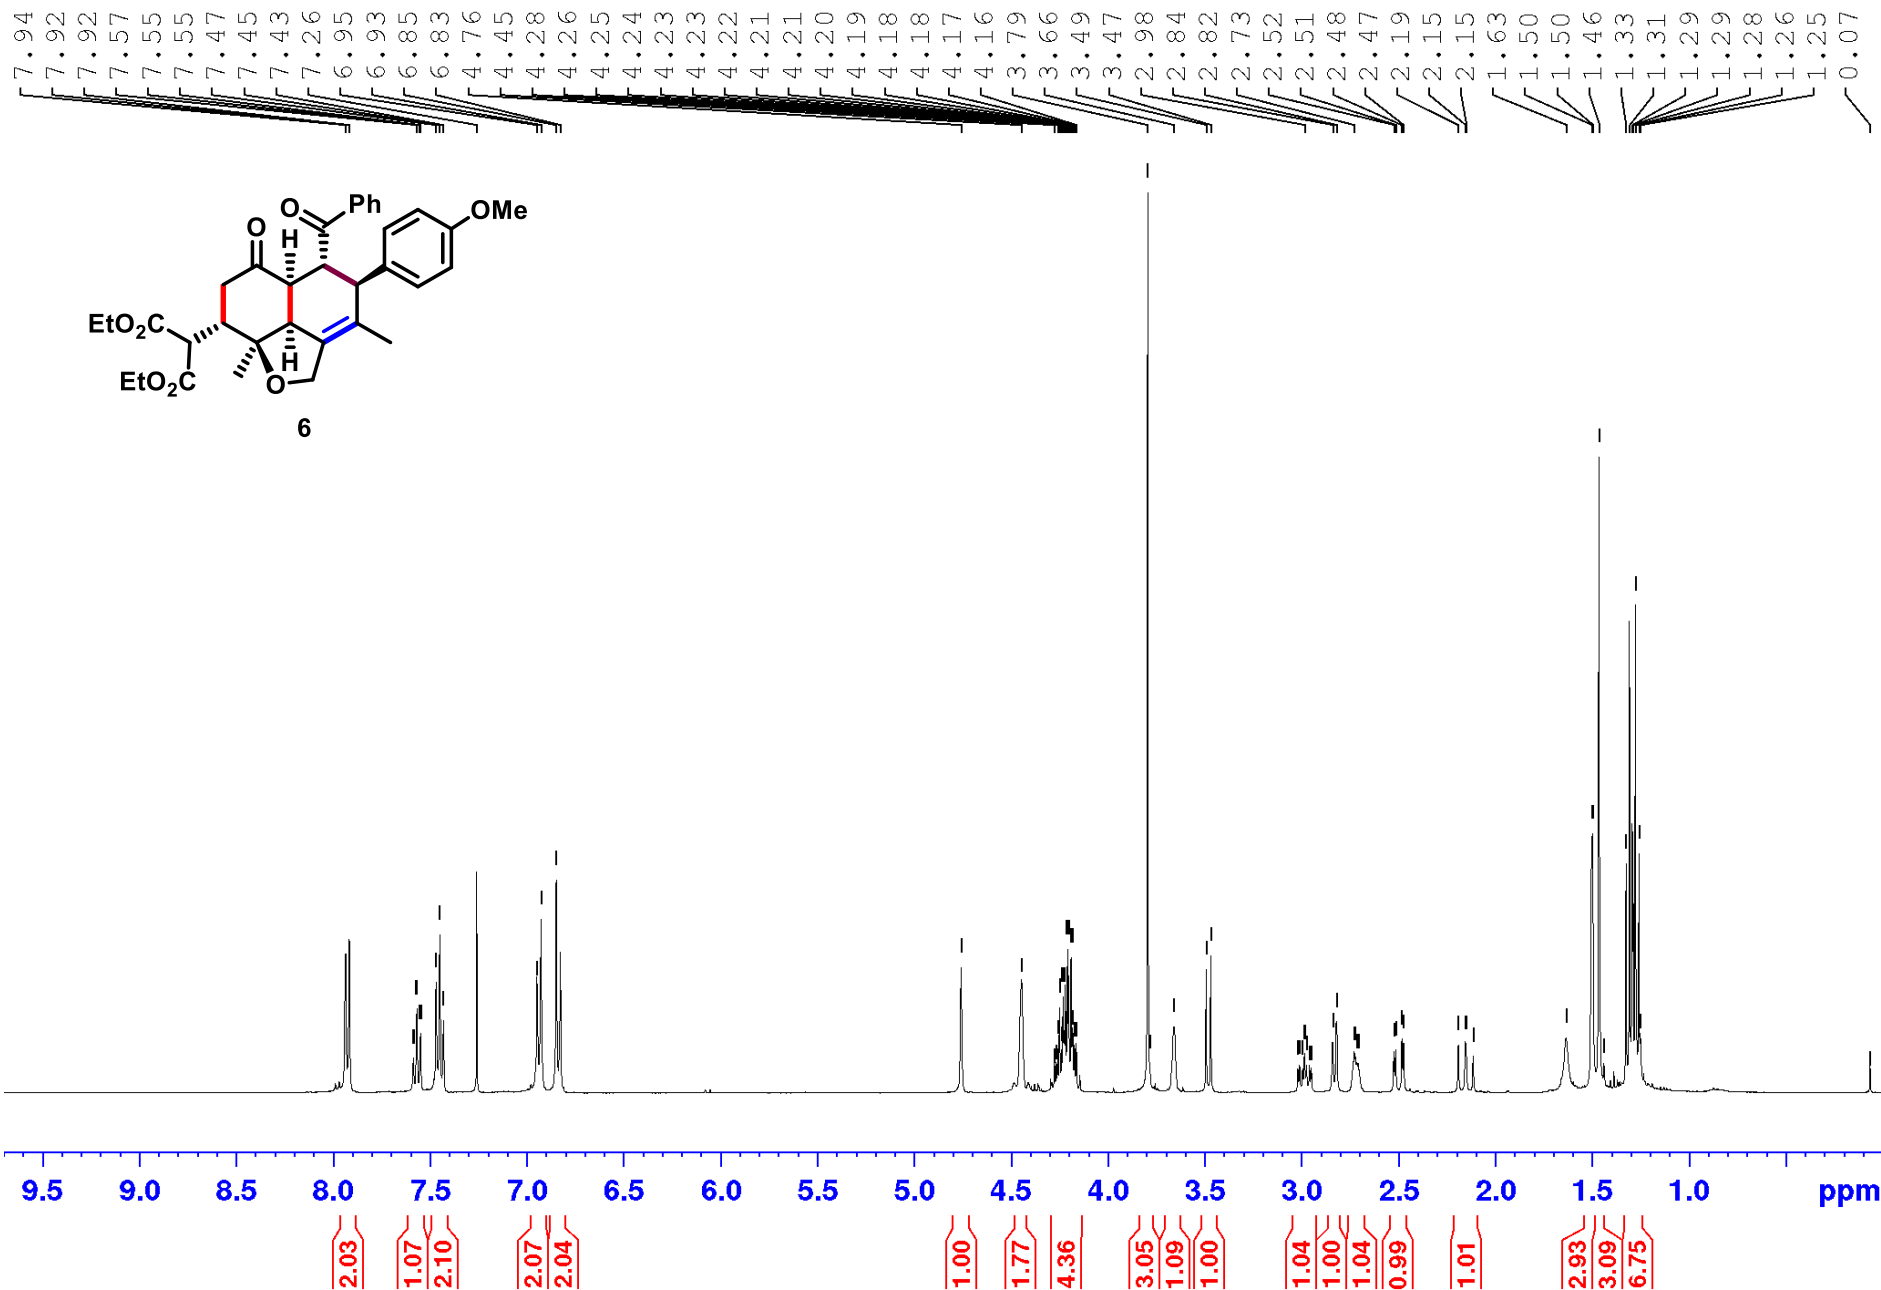

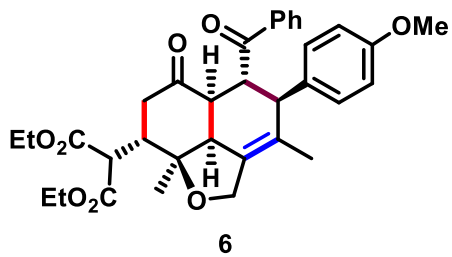

204.57  
201.45

168.16  
168.08

158.27

135.17  
135.07  
133.29  
132.81  
129.80  
128.87  
128.67  
126.20

113.76

82.27  
77.31  
76.99  
76.68

66.99  
61.73  
61.61

55.14  
52.29  
48.13  
47.72  
44.35  
44.15  
40.99  
37.60

18.60  
18.23  
14.04  
13.94

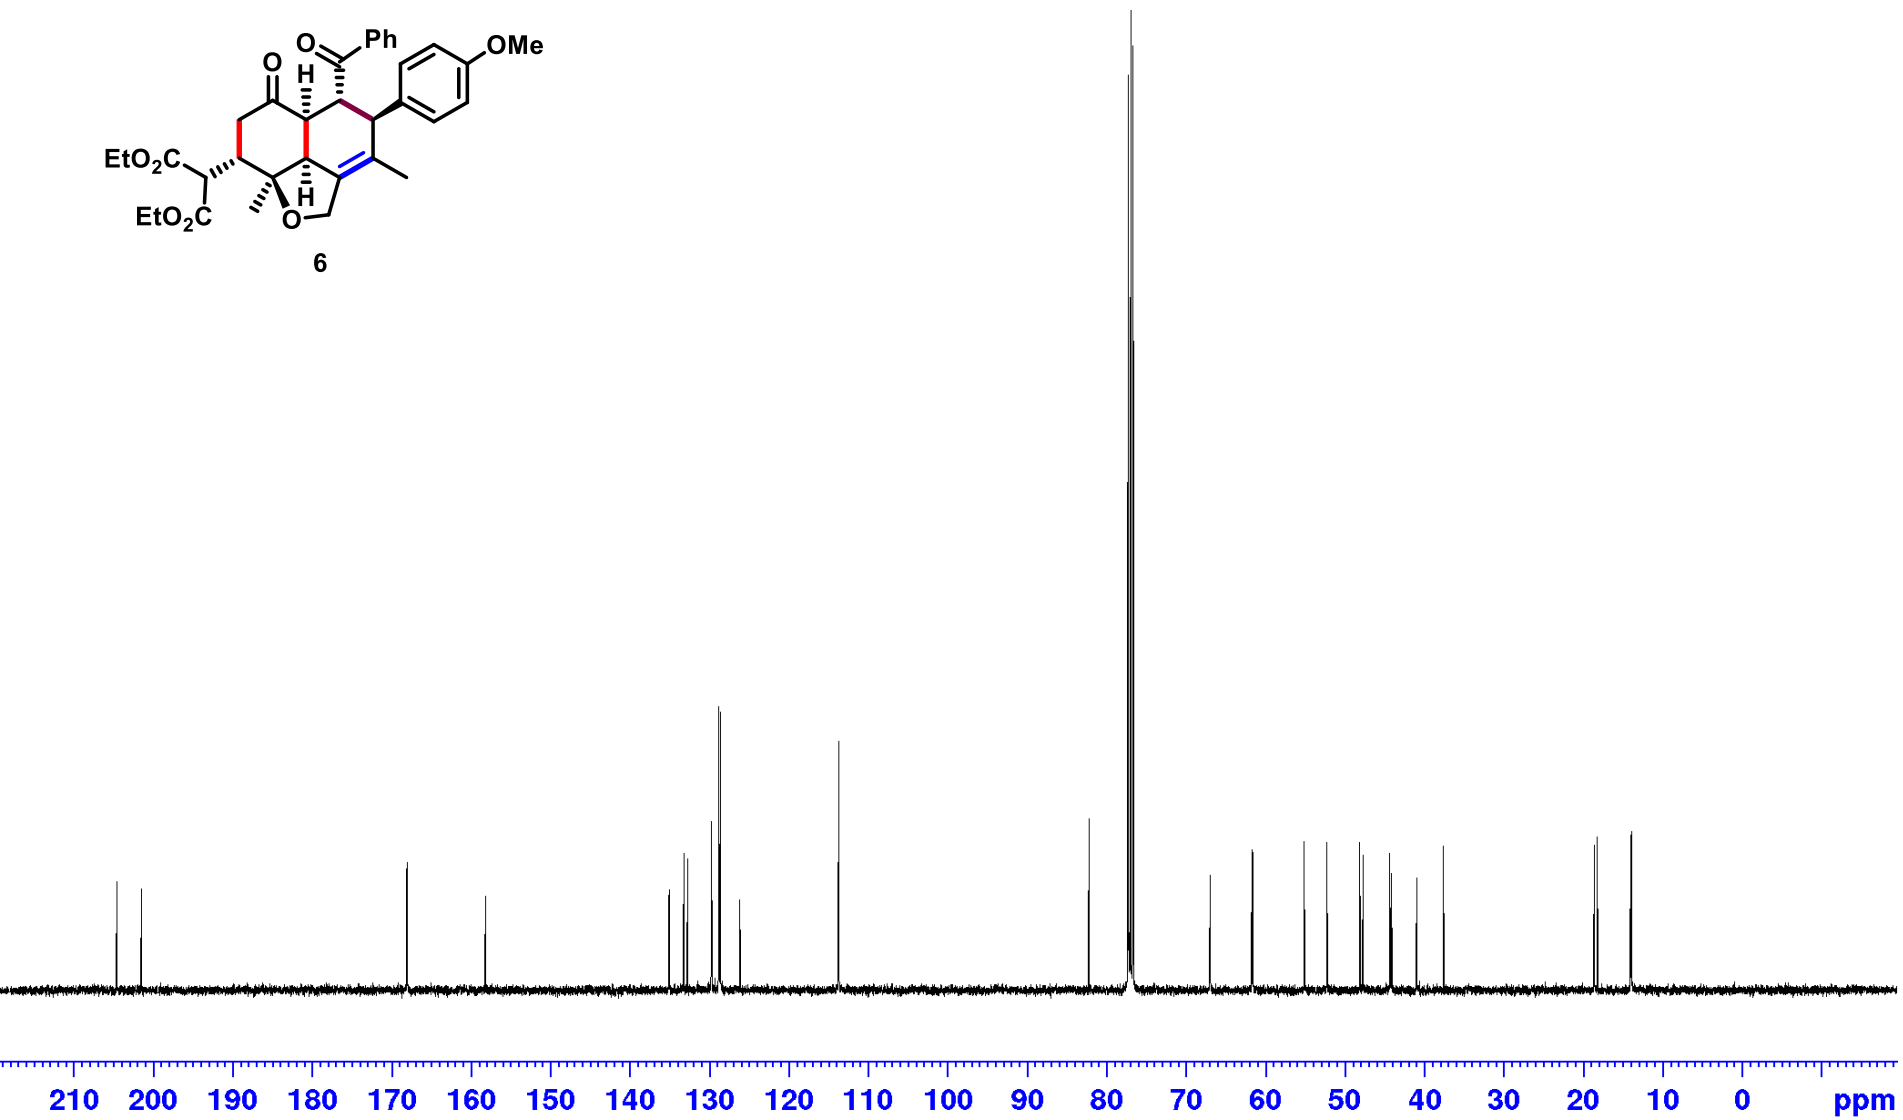

Supplementary Figure 30. <sup>1</sup>H and <sup>13</sup>C-NMR of product 7

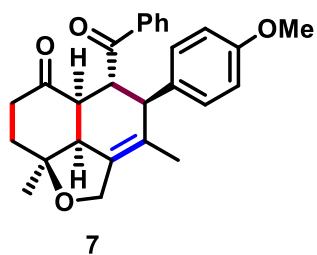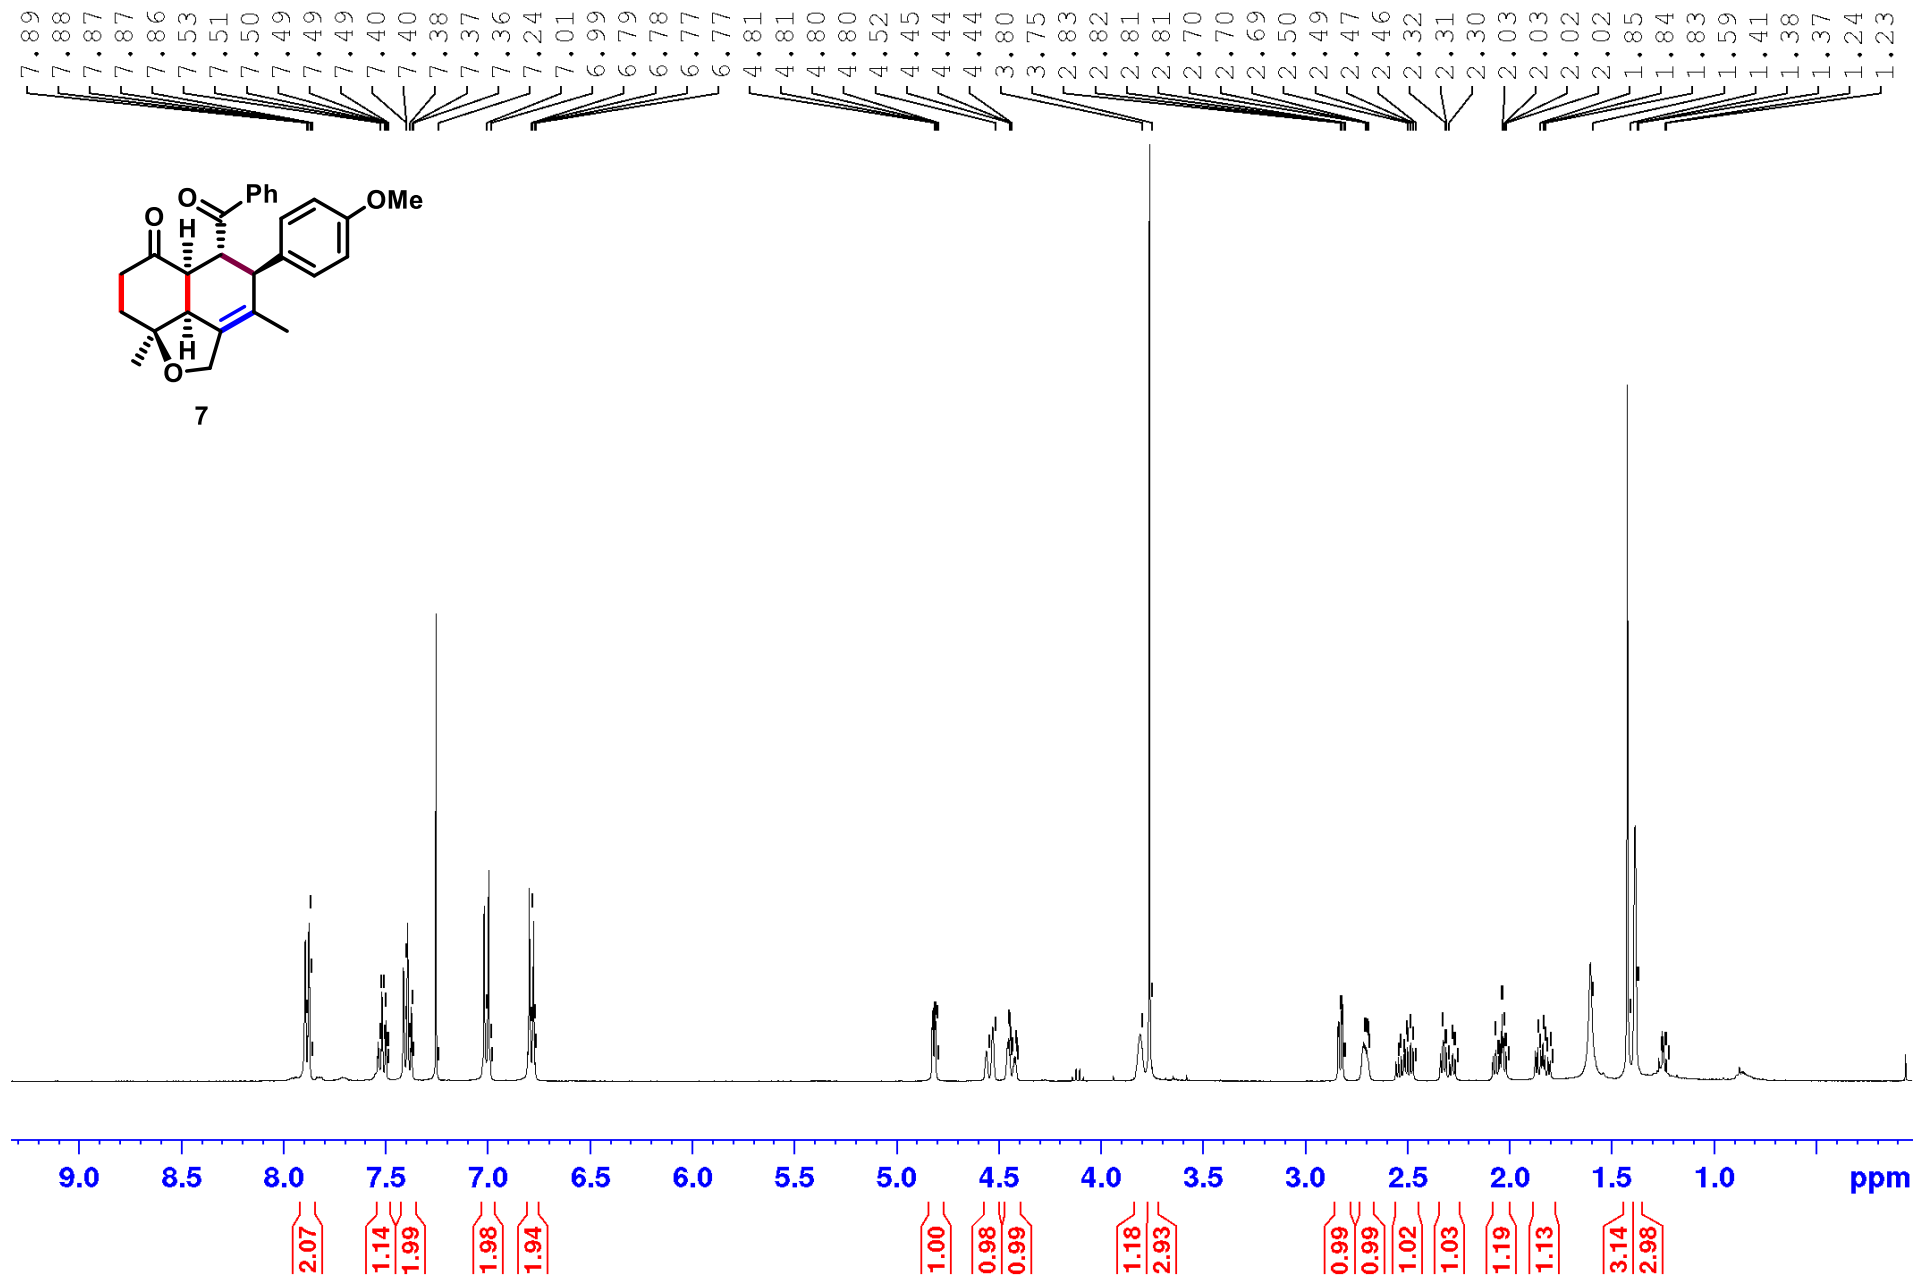





Supplementary Figure 31. <sup>1</sup>H and <sup>13</sup>C-NMR of product 8

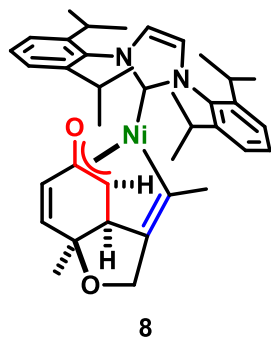

8

7.329  
7.310  
7.292  
7.252  
7.233  
7.159  
6.693

5.940  
5.915  
5.497  
5.472

4.601  
4.586  
3.866  
3.843  
3.714  
3.691  
3.218  
3.203  
3.186  
3.170  
3.154  
3.023  
3.007  
2.991  
2.974  
2.958  
2.730  
2.111  
1.484  
1.468  
1.435  
1.419  
1.199  
1.139  
1.046  
1.029

9.5 9.0 8.5 8.0 7.5 7.0 6.5 6.0 5.5 5.0 4.5 4.0 3.5 3.0 2.5 2.0 1.5 1.0 ppm

2.25  
4.32

2.06

1.03

1.00

1.02

1.02

1.04

2.08

2.11

1.05

12.78

6.82

13.42

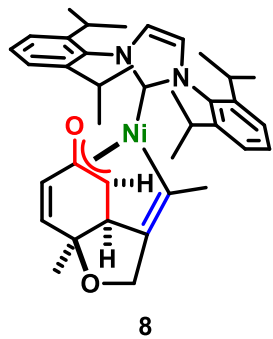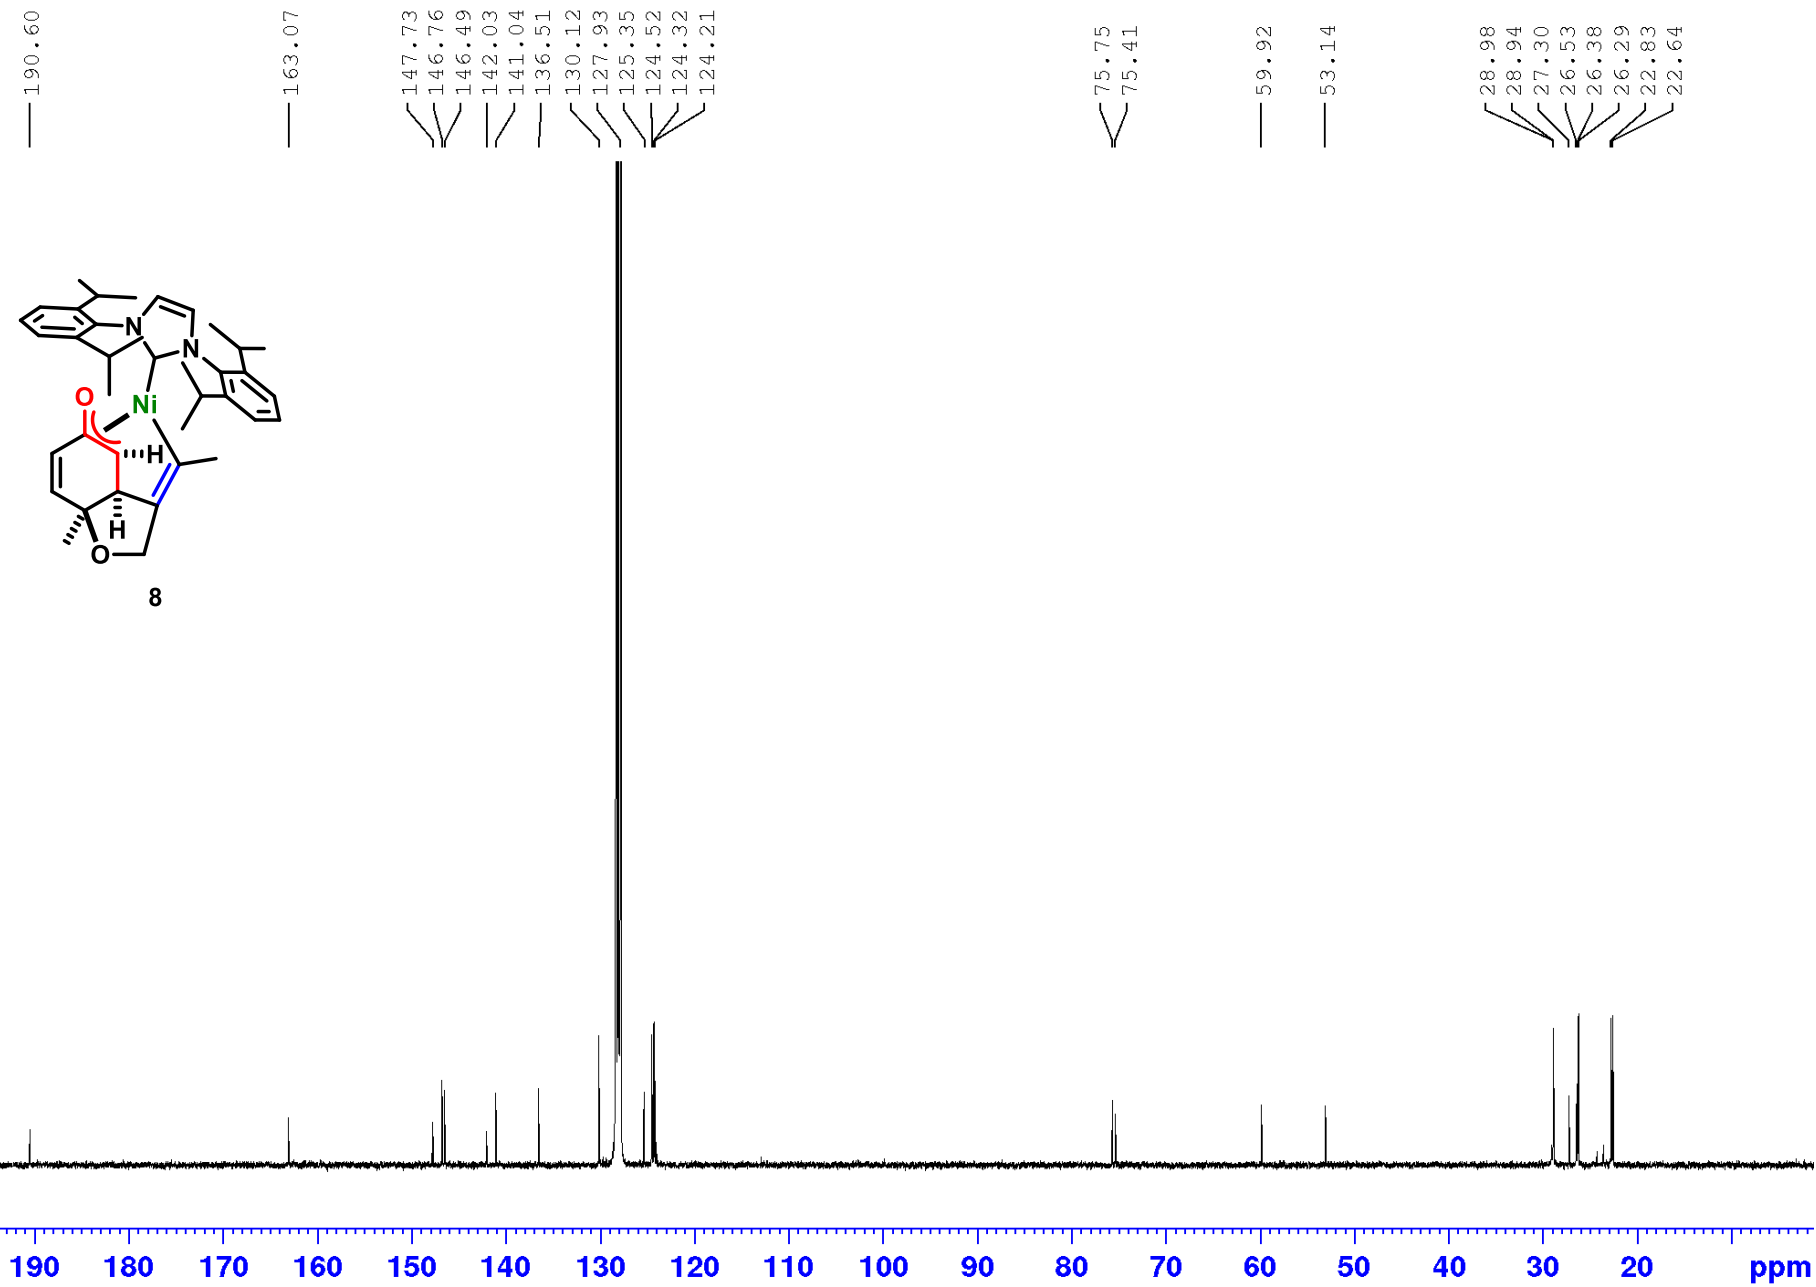

## Supplementary References

1. Seiders, T. J., Ward, D. W. & Grubbs, R. H. Enantioselective ruthenium-catalyzed ring-closing metathesis. *Org. Lett.* **3**, 3225–3228 (2001).
2. Luan, X., Mariz, R., Robert, C., Gatti, M., Blumentritt, S., Linden, A. & Dorta, R. Matching the chirality of monodentate *N*-heterocyclic carbene ligands: a case study on well-defined palladium complexes for the asymmetric  $\alpha$ -arylation of amides. *Org. Lett.* **10**, 5569–5572 (2008).
3. Matsumoto, Y., Yamada, K. & Tomioka, K.  $C_2$  symmetric chiral NHC ligand for asymmetric quaternary carbon constructing copper-catalyzed conjugate addition of Grignard reagents to 3-substituted cyclohexenones. *J. Org. Chem.* **73**, 4578–4581 (2008).
4. Chaulagain, M. R., Sormunen, G. J. & Montgomery, J. New *N*-heterocyclic carbene ligand and its application in asymmetric nickel-catalyzed aldehyde/alkyne reductive couplings. *J. Am. Chem. Soc.* **129**, 9568–9569 (2007).
5. Tello-Aburto, R., Kalstabakken, K. A. & Harned, A. M. Ligand and substrate effects during Pd-catalyzed cyclizations of alkyne-tethered cyclohexadienones. *Org. Biomol. Chem.* **11**, 5596–5604, (2013).
6. Takenaka, K., Mohanta, S. C. & Sasai, H. Palladium enolate umpolung: cyclative diacetoxylation of alkynyl cyclohexadienones promoted by a Pd/SPRIX catalyst. *Angew. Chem. Int. Ed.* **53**, 4675–4679, (2014).
7. He, Z.-T., Tang, X.-Q., Xie, L.-B., Cheng, M., Tian, P. & Lin, G. Q. Efficient access to bicyclo[4.3.0]nonanes: copper-catalyzed asymmetric silylative cyclization of cyclohexadienone-tethered allenes. *Angew. Chem. Int. Ed.* **54**, 14815–14818 (2015).
8. Hexum, J. K., Tello-Aburto, R., Struntz, N. B., Harned, A. M. & Harki, D. A. Bicyclic cyclohexenones as inhibitors of NF- $\kappa$ B signaling. *ACS Medicinal Chemistry Letters* **3**, 459–464, (2012).
